# Supplementary material
Source: publisher figshare collection journal article supplement (https://acs.figshare.com/ndownloader/files/9996343)
Supplement: Supplementary file 1 [file 9996343]

 
data_C:\CFZ_CIT
 
_audit_creation_method            'SHELXL-2014/7'
_shelx_SHELXL_version_number      '2014/7'
_chemical_name_systematic         ?
_chemical_name_common             ?
_chemical_melting_point           ?
_chemical_formula_moiety          ?
_chemical_formula_sum
 'C33 H30 Cl2 N4 O7' 
_chemical_formula_weight          665.51

loop_
 _atom_type_symbol
 _atom_type_description
 _atom_type_scat_dispersion_real
 _atom_type_scat_dispersion_imag
 _atom_type_scat_source
 'C'  'C'   0.0033   0.0016
 'International Tables Vol C Tables 4.2.6.8 and 6.1.1.4'
 'H'  'H'   0.0000   0.0000
 'International Tables Vol C Tables 4.2.6.8 and 6.1.1.4'
 'N'  'N'   0.0061   0.0033
 'International Tables Vol C Tables 4.2.6.8 and 6.1.1.4'
 'O'  'O'   0.0106   0.0060
 'International Tables Vol C Tables 4.2.6.8 and 6.1.1.4'
 'Cl'  'Cl'   0.1484   0.1585
 'International Tables Vol C Tables 4.2.6.8 and 6.1.1.4'
 
_space_group_crystal_system       triclinic
_space_group_IT_number            2
_space_group_name_H-M_alt         'P -1'
_space_group_name_Hall            '-P 1'
 
_shelx_space_group_comment
;
The symmetry employed for this shelxl refinement is uniquely defined
by the following loop, which should always be used as a source of
symmetry information in preference to the above space-group names.
They are only intended as comments.
;
 
loop_
 _space_group_symop_operation_xyz
 'x, y, z'
 '-x, -y, -z'
 
_cell_length_a                    14.7409(6)
_cell_length_b                    15.8211(6)
_cell_length_c                    16.2514(7)
_cell_angle_alpha                 71.9280(10)
_cell_angle_beta                  63.0410(10)
_cell_angle_gamma                 70.747(2)
_cell_volume                      3130.6(2)
_cell_formula_units_Z             4
_cell_measurement_temperature     296(2)
_cell_measurement_reflns_used     715 
_cell_measurement_theta_min       4 
_cell_measurement_theta_max       20 
 
_exptl_crystal_description        plate 
_exptl_crystal_colour             purple
_exptl_crystal_density_meas       ?
_exptl_crystal_density_method     ?
_exptl_crystal_density_diffrn     1.412          
_exptl_crystal_F_000              1384
_exptl_transmission_factor_min    ?
_exptl_transmission_factor_max    ?
_exptl_crystal_size_max           0.300
_exptl_crystal_size_mid           0.300
_exptl_crystal_size_min           0.100
_exptl_absorpt_coefficient_mu     0.263
_shelx_estimated_absorpt_T_min    0.925
_shelx_estimated_absorpt_T_max    0.974
_exptl_absorpt_correction_type    multi-scan 
_exptl_absorpt_correction_T_min   0.7144   
_exptl_absorpt_correction_T_max   0.7456
_exptl_absorpt_process_details    sadabs 
_exptl_absorpt_special_details    ?
_diffrn_ambient_temperature       296(2)
_diffrn_radiation_wavelength      0.71073
_diffrn_radiation_type            MoK\a
_diffrn_source                    ?
_diffrn_measurement_device_type   'Bruker D8 Quest' 
_diffrn_measurement_method        ?
_diffrn_detector_area_resol_mean  ?
_diffrn_reflns_number             165339
_diffrn_reflns_av_unetI/netI      0.0795
_diffrn_reflns_av_R_equivalents   0.1121
_diffrn_reflns_limit_h_min        -19
_diffrn_reflns_limit_h_max        19
_diffrn_reflns_limit_k_min        -20
_diffrn_reflns_limit_k_max        20
_diffrn_reflns_limit_l_min        -21
_diffrn_reflns_limit_l_max        21
_diffrn_reflns_theta_min          2.333
_diffrn_reflns_theta_max          27.555
_diffrn_reflns_theta_full         25.242
_diffrn_measured_fraction_theta_max   0.998
_diffrn_measured_fraction_theta_full  0.999
_diffrn_reflns_Laue_measured_fraction_max    0.998
_diffrn_reflns_Laue_measured_fraction_full   0.999
_diffrn_reflns_point_group_measured_fraction_max   0.998
_diffrn_reflns_point_group_measured_fraction_full  0.999
_reflns_number_total              14446
_reflns_number_gt                 7961
_reflns_threshold_expression      'I > 2\s(I)'
_reflns_Friedel_coverage          0.000
_reflns_Friedel_fraction_max      .
_reflns_Friedel_fraction_full     .
 
_reflns_special_details
;
 Reflections were merged by SHELXL according to the crystal
 class for the calculation of statistics and refinement.
 
 _reflns_Friedel_fraction is defined as the number of unique
 Friedel pairs measured divided by the number that would be
 possible theoretically, ignoring centric projections and
 systematic absences.
;
 
_computing_data_collection        ?
_computing_cell_refinement        ?
_computing_data_reduction         ?
_computing_structure_solution     ?
_computing_structure_refinement 'SHELXL-2014/7 (Sheldrick, 2014)'
_computing_molecular_graphics     ?
_computing_publication_material   ?
_refine_special_details           ?
_refine_ls_structure_factor_coef  Fsqd
_refine_ls_matrix_type            full
_refine_ls_weighting_scheme       calc
_refine_ls_weighting_details
'w=1/[\s^2^(Fo^2^)+(0.0552P)^2^+1.4873P] where P=(Fo^2^+2Fc^2^)/3'
_atom_sites_solution_primary      ?
_atom_sites_solution_secondary    ?
_atom_sites_solution_hydrogens    geom
_refine_ls_hydrogen_treatment     constr
_refine_ls_extinction_method      'SHELXL-2014/7 (Sheldrick 2014'
_refine_ls_extinction_coef        0.0024(3)
_refine_ls_extinction_expression
 'Fc^*^=kFc[1+0.001xFc^2^\l^3^/sin(2\q)]^-1/4^'
_refine_ls_number_reflns          14446
_refine_ls_number_parameters      840
_refine_ls_number_restraints      0
_refine_ls_R_factor_all           0.1442
_refine_ls_R_factor_gt            0.0629
_refine_ls_wR_factor_ref          0.1413
_refine_ls_wR_factor_gt           0.1157
_refine_ls_goodness_of_fit_ref    1.010
_refine_ls_restrained_S_all       1.010
_refine_ls_shift/su_max           0.000
_refine_ls_shift/su_mean          0.000
 
loop_
 _atom_site_label
 _atom_site_type_symbol
 _atom_site_fract_x
 _atom_site_fract_y
 _atom_site_fract_z
 _atom_site_U_iso_or_equiv
 _atom_site_adp_type
 _atom_site_occupancy
 _atom_site_site_symmetry_order  
 _atom_site_calc_flag
 _atom_site_refinement_flags_posn
 _atom_site_refinement_flags_adp
 _atom_site_refinement_flags_occupancy
 _atom_site_disorder_assembly
 _atom_site_disorder_group
Cl1A Cl 0.87559(8) 0.67693(7) -0.37414(6) 0.0891(4) Uani 1 1 d . . . . .
Cl2A Cl 0.09616(7) 0.80910(7) 0.64862(6) 0.0802(3) Uani 1 1 d . . . . .
N1A N 0.36493(16) 0.95602(14) 0.06401(13) 0.0303(5) Uani 1 1 d . . . . .
N2A N 0.53180(15) 0.87088(14) -0.07893(13) 0.0296(5) Uani 1 1 d . . . . .
N3A N 0.58855(15) 0.61450(14) 0.15689(14) 0.0328(5) Uani 1 1 d . . . . .
H3A H 0.5645 0.5878 0.2148 0.039 Uiso 1 1 calc R U . . .
N4A N 0.40744(15) 0.68969(13) 0.29439(13) 0.0299(5) Uani 1 1 d . . . . .
H4A H 0.4383 0.6330 0.3025 0.036 Uiso 1 1 calc R U . . .
C1A C 0.39299(19) 0.99889(16) -0.02816(17) 0.0290(6) Uani 1 1 d . . . . .
C2A C 0.3368(2) 1.08713(17) -0.05107(18) 0.0348(6) Uani 1 1 d . . . . .
H2A H 0.2831 1.1160 -0.0032 0.042 Uiso 1 1 calc R U . . .
C3A C 0.3597(2) 1.13144(19) -0.14263(19) 0.0407(7) Uani 1 1 d . . . . .
H1 H 0.3215 1.1898 -0.1567 0.049 Uiso 1 1 calc R U . . .
C4A C 0.4406(2) 1.08886(19) -0.21482(19) 0.0426(7) Uani 1 1 d . . . . .
H3 H 0.4555 1.1191 -0.2770 0.051 Uiso 1 1 calc R U . . .
C5A C 0.4982(2) 1.00342(19) -0.19573(18) 0.0396(7) Uani 1 1 d . . . . .
H5A H 0.5521 0.9759 -0.2445 0.048 Uiso 1 1 calc R U . . .
C6A C 0.47554(19) 0.95760(17) -0.10243(17) 0.0297(6) Uani 1 1 d . . . . .
C7A C 0.50746(18) 0.82606(16) 0.01268(16) 0.0265(5) Uani 1 1 d . . . . .
C8A C 0.56193(19) 0.74073(16) 0.03826(16) 0.0301(6) Uani 1 1 d . . . . .
H8A H 0.6196 0.7125 -0.0079 0.036 Uiso 1 1 calc R U . . .
C9A C 0.53291(18) 0.69480(16) 0.13232(16) 0.0263(5) Uani 1 1 d . . . . .
C10A C 0.43849(18) 0.73835(16) 0.20461(15) 0.0262(5) Uani 1 1 d . . . . .
C11A C 0.38895(19) 0.82470(16) 0.17790(16) 0.0289(6) Uani 1 1 d . . . . .
H11A H 0.3322 0.8537 0.2241 0.035 Uiso 1 1 calc R U . . .
C12A C 0.41885(18) 0.87271(16) 0.08394(16) 0.0263(5) Uani 1 1 d . . . . .
C13A C 0.6165(2) 0.82467(17) -0.15278(16) 0.0329(6) Uani 1 1 d . . . . .
C14A C 0.5954(2) 0.7696(2) -0.1892(2) 0.0493(8) Uani 1 1 d . . . . .
H14A H 0.5276 0.7627 -0.1677 0.059 Uiso 1 1 calc R U . . .
C15A C 0.6760(3) 0.7242(2) -0.2583(2) 0.0594(9) Uani 1 1 d . . . . .
H15A H 0.6626 0.6871 -0.2842 0.071 Uiso 1 1 calc R U . . .
C16A C 0.7749(3) 0.7343(2) -0.28795(19) 0.0509(8) Uani 1 1 d . . . . .
C17A C 0.7959(2) 0.7898(2) -0.2516(2) 0.0569(9) Uani 1 1 d . . . . .
H17A H 0.8639 0.7961 -0.2727 0.068 Uiso 1 1 calc R U . . .
C18A C 0.7155(2) 0.8363(2) -0.18360(18) 0.0459(7) Uani 1 1 d . . . . .
H18A H 0.7285 0.8749 -0.1591 0.055 Uiso 1 1 calc R U . . .
C19A C 0.68811(19) 0.56667(17) 0.09375(18) 0.0348(6) Uani 1 1 d . . . . .
H19A H 0.7294 0.6117 0.0504 0.042 Uiso 1 1 calc R U . . .
C20A C 0.6699(2) 0.5189(2) 0.0366(2) 0.0571(9) Uani 1 1 d . . . . .
H20A H 0.6310 0.4734 0.0781 0.086 Uiso 1 1 calc R U . . .
H20B H 0.7359 0.4903 -0.0059 0.086 Uiso 1 1 calc R U . . .
H20C H 0.6314 0.5627 0.0013 0.086 Uiso 1 1 calc R U . . .
C21A C 0.7463(2) 0.5013(2) 0.1529(2) 0.0507(8) Uani 1 1 d . . . . .
H21A H 0.7599 0.5347 0.1847 0.076 Uiso 1 1 calc R U . . .
H21B H 0.8112 0.4685 0.1131 0.076 Uiso 1 1 calc R U . . .
H21C H 0.7048 0.4590 0.1984 0.076 Uiso 1 1 calc R U . . .
C22A C 0.32990(18) 0.72321(16) 0.37494(16) 0.0274(6) Uani 1 1 d . . . . .
C23A C 0.3166(2) 0.80839(17) 0.39027(17) 0.0344(6) Uani 1 1 d . . . . .
H23A H 0.3572 0.8482 0.3441 0.041 Uiso 1 1 calc R U . . .
C24A C 0.2437(2) 0.83485(19) 0.47352(18) 0.0404(7) Uani 1 1 d . . . . .
H24A H 0.2343 0.8926 0.4832 0.049 Uiso 1 1 calc R U . . .
C25A C 0.1850(2) 0.7754(2) 0.54234(18) 0.0449(7) Uani 1 1 d . . . . .
C26A C 0.1979(2) 0.6898(2) 0.5294(2) 0.0511(8) Uani 1 1 d . . . . .
H26A H 0.1588 0.6496 0.5767 0.061 Uiso 1 1 calc R U . . .
C27A C 0.2697(2) 0.66433(18) 0.44539(18) 0.0399(7) Uani 1 1 d . . . . .
H27A H 0.2780 0.6068 0.4357 0.048 Uiso 1 1 calc R U . . .
Cl1B Cl -0.10802(7) -0.08180(6) 1.52395(5) 0.0642(3) Uani 1 1 d . . . . .
Cl2B Cl 0.40713(8) 0.00476(7) 0.42968(6) 0.0830(3) Uani 1 1 d . . . . .
N1B N 0.30051(16) -0.20096(13) 0.96607(14) 0.0324(5) Uani 1 1 d . . . . .
N2B N 0.15969(16) -0.15922(13) 1.14163(13) 0.0287(5) Uani 1 1 d . . . . .
N3B N 0.04442(16) 0.14110(13) 0.98464(14) 0.0319(5) Uani 1 1 d . . . . .
H3B H 0.0449 0.1756 0.9319 0.038 Uiso 1 1 calc R U . . .
N4B N 0.17166(17) 0.09007(14) 0.81088(14) 0.0352(5) Uani 1 1 d . . . . .
H4B H 0.1345 0.1445 0.8154 0.042 Uiso 1 1 calc R U . . .
C1B C 0.2960(2) -0.26405(16) 1.04666(17) 0.0311(6) Uani 1 1 d . . . . .
C2B C 0.3643(2) -0.35034(17) 1.0390(2) 0.0406(7) Uani 1 1 d . . . . .
H2B H 0.4112 -0.3632 0.9801 0.049 Uiso 1 1 calc R U . . .
C3B C 0.3620(2) -0.41504(19) 1.1175(2) 0.0466(7) Uani 1 1 d . . . . .
H2 H 0.4072 -0.4720 1.1118 0.056 Uiso 1 1 calc R U . . .
C4B C 0.2924(2) -0.39658(19) 1.2060(2) 0.0450(7) Uani 1 1 d . . . . .
H4 H 0.2915 -0.4416 1.2591 0.054 Uiso 1 1 calc R U . . .
C5B C 0.2251(2) -0.31295(17) 1.21637(19) 0.0384(7) Uani 1 1 d . . . . .
H5B H 0.1798 -0.3010 1.2760 0.046 Uiso 1 1 calc R U . . .
C6B C 0.2253(2) -0.24565(16) 1.13628(17) 0.0308(6) Uani 1 1 d . . . . .
C7B C 0.16119(19) -0.09476(16) 1.06261(16) 0.0277(6) Uani 1 1 d . . . . .
C8B C 0.09718(19) -0.00836(16) 1.06470(17) 0.0308(6) Uani 1 1 d . . . . .
H8B H 0.0496 0.0073 1.1224 0.037 Uiso 1 1 calc R U . . .
C9B C 0.10215(19) 0.05583(16) 0.98248(16) 0.0267(6) Uani 1 1 d . . . . .
C10B C 0.17231(19) 0.02959(16) 0.89123(16) 0.0277(6) Uani 1 1 d . . . . .
C11B C 0.2375(2) -0.05555(16) 0.89060(16) 0.0306(6) Uani 1 1 d . . . . .
H11B H 0.2851 -0.0714 0.8330 0.037 Uiso 1 1 calc R U . . .
C12B C 0.23553(19) -0.11987(16) 0.97318(16) 0.0284(6) Uani 1 1 d . . . . .
C13B C 0.09054(19) -0.13695(16) 1.23411(16) 0.0283(6) Uani 1 1 d . . . . .
C14B C 0.1123(2) -0.07707(17) 1.26517(18) 0.0350(6) Uani 1 1 d . . . . .
H14B H 0.1678 -0.0489 1.2264 0.042 Uiso 1 1 calc R U . . .
C15B C 0.0503(2) -0.05947(19) 1.35475(19) 0.0409(7) Uani 1 1 d . . . . .
H15B H 0.0631 -0.0186 1.3767 0.049 Uiso 1 1 calc R U . . .
C16B C -0.0307(2) -0.10317(18) 1.41129(17) 0.0372(7) Uani 1 1 d . . . . .
C17B C -0.0526(2) -0.16221(18) 1.37978(18) 0.0390(7) Uani 1 1 d . . . . .
H17B H -0.1078 -0.1908 1.4186 0.047 Uiso 1 1 calc R U . . .
C18B C 0.0083(2) -0.17870(17) 1.28960(17) 0.0339(6) Uani 1 1 d . . . . .
H18B H -0.0062 -0.2177 1.2668 0.041 Uiso 1 1 calc R U . . .
C19B C -0.0195(2) 0.18035(17) 1.06958(18) 0.0388(7) Uani 1 1 d . . . . .
H19B H -0.0561 0.1349 1.1193 0.047 Uiso 1 1 calc R U . . .
C20B C 0.0496(3) 0.2031(2) 1.1019(2) 0.0612(9) Uani 1 1 d . . . . .
H20D H 0.0928 0.1478 1.1221 0.092 Uiso 1 1 calc R U . . .
H20E H 0.0069 0.2349 1.1533 0.092 Uiso 1 1 calc R U . . .
H20F H 0.0930 0.2411 1.0509 0.092 Uiso 1 1 calc R U . . .
C21B C -0.0995(2) 0.26291(19) 1.0505(2) 0.0538(8) Uani 1 1 d . . . . .
H21D H -0.0649 0.3091 1.0037 0.081 Uiso 1 1 calc R U . . .
H21E H -0.1444 0.2859 1.1074 0.081 Uiso 1 1 calc R U . . .
H21F H -0.1403 0.2465 1.0281 0.081 Uiso 1 1 calc R U . . .
C22B C 0.2292(2) 0.06790(16) 0.71997(16) 0.0314(6) Uani 1 1 d . . . . .
C23B C 0.2869(2) 0.12684(18) 0.64831(18) 0.0398(7) Uani 1 1 d . . . . .
H23B H 0.2894 0.1796 0.6603 0.048 Uiso 1 1 calc R U . . .
C24B C 0.3410(2) 0.1077(2) 0.55877(19) 0.0487(8) Uani 1 1 d . . . . .
H24B H 0.3796 0.1476 0.5103 0.058 Uiso 1 1 calc R U . . .
C25B C 0.3372(2) 0.0297(2) 0.54209(18) 0.0440(7) Uani 1 1 d . . . . .
C26B C 0.2795(2) -0.02943(19) 0.61228(19) 0.0443(7) Uani 1 1 d . . . . .
H26B H 0.2775 -0.0822 0.5999 0.053 Uiso 1 1 calc R U . . .
C27B C 0.2246(2) -0.00971(18) 0.70098(18) 0.0391(7) Uani 1 1 d . . . . .
H27B H 0.1841 -0.0487 0.7486 0.047 Uiso 1 1 calc R U . . .
O1C O 0.33865(16) 0.44912(13) 0.57679(13) 0.0513(5) Uani 1 1 d . . . . .
O2C O 0.39299(16) 0.31034(14) 0.64840(13) 0.0558(6) Uani 1 1 d . . . . .
H2C H 0.3326 0.3197 0.6870 0.067 Uiso 1 1 calc R U . . .
O3C O 0.42239(15) 0.28858(12) 0.44130(14) 0.0439(5) Uani 1 1 d . . . . .
H3C H 0.3609 0.3156 0.4571 0.053 Uiso 1 1 calc R U . . .
O4C O 0.65895(18) 0.23412(15) 0.21446(14) 0.0618(6) Uani 1 1 d . . . . .
H4C H 0.6603 0.2358 0.1630 0.074 Uiso 1 1 calc R U . . .
O5C O 0.53019(17) 0.35514(15) 0.21303(14) 0.0571(6) Uani 1 1 d . . . . .
O6C O 0.48935(15) 0.50481(12) 0.33026(13) 0.0440(5) Uani 1 1 d . . . . .
O7C O 0.34324(15) 0.45857(13) 0.37529(12) 0.0448(5) Uani 1 1 d . . . . .
C1C C 0.4046(2) 0.37853(19) 0.57618(18) 0.0380(7) Uani 1 1 d . . . . .
C2C C 0.5046(2) 0.35970(19) 0.49331(17) 0.0379(6) Uani 1 1 d . . . . .
H2C1 H 0.5492 0.3034 0.5116 0.045 Uiso 1 1 calc R U . . .
H2C2 H 0.5405 0.4086 0.4733 0.045 Uiso 1 1 calc R U . . .
C3C C 0.4855(2) 0.35160(16) 0.41051(17) 0.0326(6) Uani 1 1 d . . . . .
C4C C 0.5903(2) 0.31194(18) 0.33884(18) 0.0399(7) Uani 1 1 d . . . . .
H4C1 H 0.6385 0.3499 0.3217 0.048 Uiso 1 1 calc R U . . .
H4C2 H 0.6180 0.2518 0.3684 0.048 Uiso 1 1 calc R U . . .
C5C C 0.5868(2) 0.30415(19) 0.25100(19) 0.0399(7) Uani 1 1 d . . . . .
C6C C 0.4345(2) 0.44633(17) 0.36766(17) 0.0343(6) Uani 1 1 d . . . . .
O1D O 0.15248(15) 0.47784(13) 0.50614(13) 0.0519(5) Uani 1 1 d . . . . .
H1D H 0.2090 0.4638 0.4636 0.062 Uiso 1 1 calc R U . . .
O2D O 0.19354(18) 0.33253(14) 0.57045(14) 0.0582(6) Uani 1 1 d . . . . .
O3D O 0.12908(14) 0.49302(11) 0.70994(12) 0.0371(4) Uani 1 1 d . . . . .
H3D H 0.1892 0.4696 0.6787 0.045 Uiso 1 1 calc R U . . .
O4D O -0.06273(18) 0.56592(13) 0.91575(15) 0.0552(6) Uani 1 1 d . . . . .
H4D H -0.0526 0.5685 0.9605 0.066 Uiso 1 1 calc R U . . .
O5D O 0.03190(15) 0.42582(13) 0.93633(13) 0.0441(5) Uani 1 1 d . . . . .
O6D O 0.05594(15) 0.27691(11) 0.81928(12) 0.0390(5) Uani 1 1 d . . . . .
O7D O 0.20515(15) 0.31624(12) 0.77551(12) 0.0440(5) Uani 1 1 d . . . . .
C1D C 0.1352(2) 0.40683(19) 0.57494(17) 0.0362(6) Uani 1 1 d . . . . .
C2D C 0.0385(2) 0.42828(18) 0.66003(17) 0.0350(6) Uani 1 1 d . . . . .
H2D1 H -0.0017 0.3824 0.6811 0.042 Uiso 1 1 calc R U . . .
H2D2 H -0.0041 0.4869 0.6434 0.042 Uiso 1 1 calc R U . . .
C3D C 0.06467(19) 0.43103(16) 0.74100(16) 0.0298(6) Uani 1 1 d . . . . .
C4D C -0.0364(2) 0.47069(18) 0.81705(18) 0.0372(6) Uani 1 1 d . . . . .
H4D1 H -0.0699 0.5286 0.7887 0.045 Uiso 1 1 calc R U . . .
H4D2 H -0.0835 0.4297 0.8432 0.045 Uiso 1 1 calc R U . . .
C5D C -0.0184(2) 0.48504(18) 0.89481(18) 0.0353(6) Uani 1 1 d . . . . .
C6D C 0.1139(2) 0.33335(17) 0.78164(16) 0.0318(6) Uani 1 1 d . . . . .
 
loop_
 _atom_site_aniso_label
 _atom_site_aniso_U_11
 _atom_site_aniso_U_22
 _atom_site_aniso_U_33
 _atom_site_aniso_U_23
 _atom_site_aniso_U_13
 _atom_site_aniso_U_12
Cl1A 0.0935(7) 0.0713(6) 0.0495(5) -0.0250(5) -0.0013(5) 0.0198(5)
Cl2A 0.0751(6) 0.0944(7) 0.0441(5) -0.0374(5) 0.0104(4) -0.0124(5)
N1A 0.0325(12) 0.0304(12) 0.0264(11) -0.0055(9) -0.0113(9) -0.0053(10)
N2A 0.0335(12) 0.0324(12) 0.0194(10) -0.0041(9) -0.0058(9) -0.0104(10)
N3A 0.0317(12) 0.0296(12) 0.0244(11) -0.0028(9) -0.0048(9) -0.0027(10)
N4A 0.0341(12) 0.0252(11) 0.0235(11) -0.0032(9) -0.0094(9) -0.0024(9)
C1A 0.0318(14) 0.0291(14) 0.0286(14) -0.0014(11) -0.0140(11) -0.0104(12)
C2A 0.0350(15) 0.0359(16) 0.0353(15) -0.0056(12) -0.0147(12) -0.0097(12)
C3A 0.0464(17) 0.0328(15) 0.0442(17) 0.0049(13) -0.0253(14) -0.0109(13)
C4A 0.0490(18) 0.0468(18) 0.0307(15) 0.0096(13) -0.0189(14) -0.0200(15)
C5A 0.0444(17) 0.0455(18) 0.0250(14) 0.0007(12) -0.0118(12) -0.0149(14)
C6A 0.0337(14) 0.0316(15) 0.0280(14) -0.0017(11) -0.0142(12) -0.0129(12)
C7A 0.0281(13) 0.0306(14) 0.0217(12) -0.0050(10) -0.0081(10) -0.0101(11)
C8A 0.0299(14) 0.0304(15) 0.0251(13) -0.0101(11) -0.0046(11) -0.0050(11)
C9A 0.0283(13) 0.0271(14) 0.0247(13) -0.0060(10) -0.0089(11) -0.0090(11)
C10A 0.0294(14) 0.0292(14) 0.0198(12) -0.0050(10) -0.0077(10) -0.0086(11)
C11A 0.0293(14) 0.0293(14) 0.0218(13) -0.0081(11) -0.0058(11) -0.0020(11)
C12A 0.0296(14) 0.0271(14) 0.0240(13) -0.0059(10) -0.0098(11) -0.0087(11)
C13A 0.0373(16) 0.0368(15) 0.0189(12) -0.0051(11) -0.0072(11) -0.0072(12)
C14A 0.0480(18) 0.058(2) 0.0418(17) -0.0197(15) -0.0079(14) -0.0160(16)
C15A 0.080(3) 0.055(2) 0.0434(18) -0.0218(16) -0.0164(18) -0.0147(19)
C16A 0.054(2) 0.0488(19) 0.0260(15) -0.0079(13) -0.0064(14) 0.0048(16)
C17A 0.0363(17) 0.087(3) 0.0345(16) -0.0136(17) -0.0037(14) -0.0110(17)
C18A 0.0405(17) 0.067(2) 0.0282(15) -0.0116(14) -0.0052(13) -0.0193(15)
C19A 0.0274(14) 0.0334(15) 0.0327(14) -0.0100(12) -0.0019(11) -0.0044(12)
C20A 0.054(2) 0.057(2) 0.060(2) -0.0329(17) -0.0142(16) -0.0036(16)
C21A 0.0341(16) 0.0468(18) 0.0557(19) -0.0086(15) -0.0128(14) 0.0015(14)
C22A 0.0273(13) 0.0321(14) 0.0195(12) -0.0052(10) -0.0079(10) -0.0042(11)
C23A 0.0436(16) 0.0333(15) 0.0238(13) -0.0028(11) -0.0110(12) -0.0110(13)
C24A 0.0500(18) 0.0363(16) 0.0347(15) -0.0127(13) -0.0182(14) -0.0014(14)
C25A 0.0411(17) 0.0530(19) 0.0287(15) -0.0139(14) -0.0054(13) -0.0024(15)
C26A 0.0517(19) 0.0497(19) 0.0331(16) -0.0059(14) 0.0026(14) -0.0180(15)
C27A 0.0442(17) 0.0316(15) 0.0321(15) -0.0082(12) -0.0020(13) -0.0107(13)
Cl1B 0.0793(6) 0.0684(6) 0.0346(4) -0.0220(4) -0.0116(4) -0.0079(5)
Cl2B 0.0920(7) 0.1060(8) 0.0361(5) -0.0336(5) -0.0038(4) -0.0160(6)
N1B 0.0403(13) 0.0260(12) 0.0320(12) -0.0064(9) -0.0170(10) -0.0036(10)
N2B 0.0382(12) 0.0253(11) 0.0233(11) -0.0044(9) -0.0131(9) -0.0065(10)
N3B 0.0423(13) 0.0235(12) 0.0245(11) -0.0031(9) -0.0117(10) -0.0041(10)
N4B 0.0540(14) 0.0225(11) 0.0265(11) -0.0047(9) -0.0184(10) -0.0014(10)
C1B 0.0394(15) 0.0255(14) 0.0346(15) -0.0066(11) -0.0207(12) -0.0049(12)
C2B 0.0481(17) 0.0278(15) 0.0474(17) -0.0079(13) -0.0238(14) -0.0024(13)
C3B 0.0575(19) 0.0286(16) 0.060(2) -0.0079(14) -0.0351(17) 0.0003(14)
C4B 0.063(2) 0.0323(16) 0.0490(18) 0.0050(13) -0.0368(16) -0.0118(15)
C5B 0.0510(17) 0.0303(15) 0.0374(15) -0.0013(12) -0.0229(14) -0.0102(13)
C6B 0.0408(15) 0.0246(14) 0.0350(14) -0.0030(11) -0.0231(12) -0.0072(12)
C7B 0.0360(14) 0.0253(14) 0.0255(13) -0.0044(11) -0.0137(11) -0.0095(11)
C8B 0.0376(15) 0.0281(14) 0.0248(13) -0.0066(11) -0.0106(11) -0.0058(12)
C9B 0.0324(14) 0.0235(14) 0.0274(13) -0.0055(10) -0.0130(11) -0.0075(11)
C10B 0.0392(15) 0.0247(14) 0.0239(13) -0.0050(10) -0.0146(11) -0.0090(12)
C11B 0.0397(15) 0.0297(14) 0.0213(13) -0.0080(11) -0.0107(11) -0.0053(12)
C12B 0.0352(14) 0.0265(14) 0.0281(13) -0.0084(11) -0.0151(11) -0.0056(12)
C13B 0.0381(15) 0.0252(13) 0.0234(13) -0.0017(10) -0.0173(11) -0.0044(12)
C14B 0.0383(16) 0.0329(15) 0.0380(15) -0.0070(12) -0.0168(13) -0.0104(12)
C15B 0.0524(18) 0.0387(16) 0.0423(16) -0.0157(13) -0.0246(15) -0.0066(14)
C16B 0.0478(17) 0.0362(16) 0.0252(13) -0.0067(12) -0.0171(13) -0.0013(13)
C17B 0.0449(17) 0.0403(16) 0.0305(15) -0.0016(12) -0.0138(13) -0.0140(13)
C18B 0.0456(16) 0.0299(14) 0.0327(14) -0.0016(11) -0.0203(13) -0.0132(13)
C19B 0.0405(16) 0.0300(15) 0.0289(14) -0.0051(12) 0.0006(12) -0.0084(13)
C20B 0.072(2) 0.064(2) 0.052(2) -0.0345(17) -0.0255(18) 0.0041(18)
C21B 0.0381(17) 0.0378(17) 0.069(2) -0.0164(15) -0.0072(15) -0.0019(14)
C22B 0.0437(16) 0.0273(14) 0.0255(13) -0.0030(11) -0.0190(12) -0.0045(12)
C23B 0.0559(18) 0.0283(15) 0.0369(16) -0.0038(12) -0.0203(14) -0.0105(13)
C24B 0.0574(19) 0.0466(19) 0.0316(16) 0.0035(13) -0.0090(14) -0.0210(15)
C25B 0.0544(19) 0.0479(18) 0.0252(14) -0.0127(13) -0.0121(13) -0.0058(15)
C26B 0.070(2) 0.0339(16) 0.0343(16) -0.0092(13) -0.0239(15) -0.0097(15)
C27B 0.0607(19) 0.0339(16) 0.0265(14) -0.0007(12) -0.0187(13) -0.0175(14)
O1C 0.0547(13) 0.0376(12) 0.0408(11) -0.0035(9) -0.0098(10) -0.0016(11)
O2C 0.0508(13) 0.0554(13) 0.0354(12) 0.0093(10) -0.0127(10) -0.0033(11)
O3C 0.0468(12) 0.0298(10) 0.0488(12) -0.0017(9) -0.0158(10) -0.0105(9)
O4C 0.0699(15) 0.0571(14) 0.0443(13) -0.0246(11) -0.0190(12) 0.0119(12)
O5C 0.0666(15) 0.0545(14) 0.0488(13) -0.0195(11) -0.0277(12) 0.0048(12)
O6C 0.0493(12) 0.0270(10) 0.0383(11) 0.0022(8) -0.0085(9) -0.0076(9)
O7C 0.0378(12) 0.0512(12) 0.0330(10) 0.0024(9) -0.0154(9) -0.0021(9)
C1C 0.0482(18) 0.0403(17) 0.0283(15) -0.0018(13) -0.0188(13) -0.0121(15)
C2C 0.0390(16) 0.0384(16) 0.0329(15) -0.0022(12) -0.0178(13) -0.0034(13)
C3C 0.0369(15) 0.0261(14) 0.0292(14) -0.0001(11) -0.0111(12) -0.0075(12)
C4C 0.0407(16) 0.0323(15) 0.0376(16) -0.0066(12) -0.0135(13) 0.0000(13)
C5C 0.0399(17) 0.0324(16) 0.0367(16) -0.0103(13) -0.0057(14) -0.0050(14)
C6C 0.0412(17) 0.0301(15) 0.0228(13) -0.0029(11) -0.0104(12) -0.0021(13)
O1D 0.0522(13) 0.0446(12) 0.0359(11) 0.0051(9) -0.0103(10) -0.0048(10)
O2D 0.0770(15) 0.0337(12) 0.0417(12) -0.0080(9) -0.0132(11) 0.0011(11)
O3D 0.0410(11) 0.0272(10) 0.0398(11) -0.0070(8) -0.0111(9) -0.0097(9)
O4D 0.0727(15) 0.0409(12) 0.0548(14) -0.0251(10) -0.0285(12) 0.0041(11)
O5D 0.0592(13) 0.0346(11) 0.0398(11) -0.0123(9) -0.0214(10) -0.0042(10)
O6D 0.0600(12) 0.0269(10) 0.0337(10) -0.0009(8) -0.0206(9) -0.0154(9)
O7D 0.0413(12) 0.0421(12) 0.0385(11) -0.0004(9) -0.0179(9) -0.0004(9)
C1D 0.0531(18) 0.0323(16) 0.0288(14) -0.0046(12) -0.0218(13) -0.0090(14)
C2D 0.0428(16) 0.0303(15) 0.0312(14) -0.0029(11) -0.0173(12) -0.0061(12)
C3D 0.0386(15) 0.0221(13) 0.0272(13) -0.0046(10) -0.0108(11) -0.0078(11)
C4D 0.0414(16) 0.0316(15) 0.0376(15) -0.0094(12) -0.0164(13) -0.0027(12)
C5D 0.0362(15) 0.0279(15) 0.0332(15) -0.0105(12) -0.0016(13) -0.0096(13)
C6D 0.0458(18) 0.0285(14) 0.0185(12) -0.0058(11) -0.0117(12) -0.0051(13)
 
_geom_special_details
;
 All esds (except the esd in the dihedral angle between two l.s. planes)
 are estimated using the full covariance matrix.  The cell esds are taken
 into account individually in the estimation of esds in distances, angles
 and torsion angles; correlations between esds in cell parameters are only
 used when they are defined by crystal symmetry.  An approximate (isotropic)
 treatment of cell esds is used for estimating esds involving l.s. planes.
;
 
loop_
 _geom_bond_atom_site_label_1
 _geom_bond_atom_site_label_2
 _geom_bond_distance
 _geom_bond_site_symmetry_2
 _geom_bond_publ_flag
Cl1A C16A 1.734(3) . ?
Cl2A C25A 1.744(3) . ?
N1A C12A 1.323(3) . ?
N1A C1A 1.367(3) . ?
N2A C7A 1.370(3) . ?
N2A C6A 1.388(3) . ?
N2A C13A 1.455(3) . ?
N3A C9A 1.319(3) . ?
N3A C19A 1.471(3) . ?
N3A H3A 0.8600 . ?
N4A C10A 1.364(3) . ?
N4A C22A 1.406(3) . ?
N4A H4A 0.8600 . ?
C1A C2A 1.403(3) . ?
C1A C6A 1.413(3) . ?
C2A C3A 1.369(4) . ?
C2A H2A 0.9300 . ?
C3A C4A 1.394(4) . ?
C3A H1 0.9300 . ?
C4A C5A 1.366(4) . ?
C4A H3 0.9300 . ?
C5A C6A 1.398(3) . ?
C5A H5A 0.9300 . ?
C7A C8A 1.371(3) . ?
C7A C12A 1.454(3) . ?
C8A C9A 1.404(3) . ?
C8A H8A 0.9300 . ?
C9A C10A 1.476(3) . ?
C10A C11A 1.360(3) . ?
C11A C12A 1.412(3) . ?
C11A H11A 0.9300 . ?
C13A C14A 1.368(4) . ?
C13A C18A 1.368(4) . ?
C14A C15A 1.384(4) . ?
C14A H14A 0.9300 . ?
C15A C16A 1.361(4) . ?
C15A H15A 0.9300 . ?
C16A C17A 1.371(4) . ?
C17A C18A 1.382(4) . ?
C17A H17A 0.9300 . ?
C18A H18A 0.9300 . ?
C19A C21A 1.508(4) . ?
C19A C20A 1.517(4) . ?
C19A H19A 0.9800 . ?
C20A H20A 0.9600 . ?
C20A H20B 0.9600 . ?
C20A H20C 0.9600 . ?
C21A H21A 0.9600 . ?
C21A H21B 0.9600 . ?
C21A H21C 0.9600 . ?
C22A C23A 1.381(3) . ?
C22A C27A 1.388(3) . ?
C23A C24A 1.377(3) . ?
C23A H23A 0.9300 . ?
C24A C25A 1.376(4) . ?
C24A H24A 0.9300 . ?
C25A C26A 1.372(4) . ?
C26A C27A 1.377(4) . ?
C26A H26A 0.9300 . ?
C27A H27A 0.9300 . ?
Cl1B C16B 1.733(3) . ?
Cl2B C25B 1.740(3) . ?
N1B C12B 1.326(3) . ?
N1B C1B 1.367(3) . ?
N2B C7B 1.366(3) . ?
N2B C6B 1.392(3) . ?
N2B C13B 1.458(3) . ?
N3B C9B 1.338(3) . ?
N3B C19B 1.465(3) . ?
N3B H3B 0.8600 . ?
N4B C10B 1.361(3) . ?
N4B C22B 1.419(3) . ?
N4B H4B 0.8600 . ?
C1B C2B 1.406(3) . ?
C1B C6B 1.407(3) . ?
C2B C3B 1.360(4) . ?
C2B H2B 0.9300 . ?
C3B C4B 1.391(4) . ?
C3B H2 0.9300 . ?
C4B C5B 1.373(4) . ?
C4B H4 0.9300 . ?
C5B C6B 1.402(3) . ?
C5B H5B 0.9300 . ?
C7B C8B 1.382(3) . ?
C7B C12B 1.449(3) . ?
C8B C9B 1.393(3) . ?
C8B H8B 0.9300 . ?
C9B C10B 1.466(3) . ?
C10B C11B 1.373(3) . ?
C11B C12B 1.405(3) . ?
C11B H11B 0.9300 . ?
C13B C18B 1.373(3) . ?
C13B C14B 1.378(3) . ?
C14B C15B 1.382(4) . ?
C14B H14B 0.9300 . ?
C15B C16B 1.380(4) . ?
C15B H15B 0.9300 . ?
C16B C17B 1.373(4) . ?
C17B C18B 1.383(4) . ?
C17B H17B 0.9300 . ?
C18B H18B 0.9300 . ?
C19B C21B 1.502(4) . ?
C19B C20B 1.513(4) . ?
C19B H19B 0.9800 . ?
C20B H20D 0.9600 . ?
C20B H20E 0.9600 . ?
C20B H20F 0.9600 . ?
C21B H21D 0.9600 . ?
C21B H21E 0.9600 . ?
C21B H21F 0.9600 . ?
C22B C23B 1.378(3) . ?
C22B C27B 1.384(3) . ?
C23B C24B 1.381(4) . ?
C23B H23B 0.9300 . ?
C24B C25B 1.365(4) . ?
C24B H24B 0.9300 . ?
C25B C26B 1.373(4) . ?
C26B C27B 1.373(4) . ?
C26B H26B 0.9300 . ?
C27B H27B 0.9300 . ?
O1C C1C 1.215(3) . ?
O2C C1C 1.313(3) . ?
O2C H2C 0.8200 . ?
O3C C3C 1.411(3) . ?
O3C H3C 0.8200 . ?
O4C C5C 1.331(3) . ?
O4C H4C 0.8200 . ?
O5C C5C 1.200(3) . ?
O6C C6C 1.256(3) . ?
O7C C6C 1.247(3) . ?
C1C C2C 1.495(4) . ?
C2C C3C 1.543(4) . ?
C2C H2C1 0.9700 . ?
C2C H2C2 0.9700 . ?
C3C C4C 1.523(3) . ?
C3C C6C 1.543(3) . ?
C4C C5C 1.496(4) . ?
C4C H4C1 0.9700 . ?
C4C H4C2 0.9700 . ?
O1D C1D 1.315(3) . ?
O1D H1D 0.8200 . ?
O2D C1D 1.207(3) . ?
O3D C3D 1.411(3) . ?
O3D H3D 0.8200 . ?
O4D C5D 1.303(3) . ?
O4D H4D 0.8200 . ?
O5D C5D 1.219(3) . ?
O6D C6D 1.262(3) . ?
O7D C6D 1.244(3) . ?
C1D C2D 1.498(4) . ?
C2D C3D 1.546(3) . ?
C2D H2D1 0.9700 . ?
C2D H2D2 0.9700 . ?
C3D C4D 1.529(3) . ?
C3D C6D 1.553(3) . ?
C4D C5D 1.498(4) . ?
C4D H4D1 0.9700 . ?
C4D H4D2 0.9700 . ?
 
loop_
 _geom_angle_atom_site_label_1
 _geom_angle_atom_site_label_2
 _geom_angle_atom_site_label_3
 _geom_angle
 _geom_angle_site_symmetry_1
 _geom_angle_site_symmetry_3
 _geom_angle_publ_flag
C12A N1A C1A 118.1(2) . . ?
C7A N2A C6A 121.5(2) . . ?
C7A N2A C13A 118.7(2) . . ?
C6A N2A C13A 119.81(19) . . ?
C9A N3A C19A 125.6(2) . . ?
C9A N3A H3A 117.2 . . ?
C19A N3A H3A 117.2 . . ?
C10A N4A C22A 126.3(2) . . ?
C10A N4A H4A 116.9 . . ?
C22A N4A H4A 116.9 . . ?
N1A C1A C2A 119.1(2) . . ?
N1A C1A C6A 122.9(2) . . ?
C2A C1A C6A 118.0(2) . . ?
C3A C2A C1A 121.2(3) . . ?
C3A C2A H2A 119.4 . . ?
C1A C2A H2A 119.4 . . ?
C2A C3A C4A 119.8(3) . . ?
C2A C3A H1 120.1 . . ?
C4A C3A H1 120.1 . . ?
C5A C4A C3A 121.0(2) . . ?
C5A C4A H3 119.5 . . ?
C3A C4A H3 119.5 . . ?
C4A C5A C6A 119.6(3) . . ?
C4A C5A H5A 120.2 . . ?
C6A C5A H5A 120.2 . . ?
N2A C6A C5A 122.1(2) . . ?
N2A C6A C1A 117.6(2) . . ?
C5A C6A C1A 120.3(2) . . ?
N2A C7A C8A 122.9(2) . . ?
N2A C7A C12A 117.0(2) . . ?
C8A C7A C12A 120.2(2) . . ?
C7A C8A C9A 121.8(2) . . ?
C7A C8A H8A 119.1 . . ?
C9A C8A H8A 119.1 . . ?
N3A C9A C8A 121.4(2) . . ?
N3A C9A C10A 119.9(2) . . ?
C8A C9A C10A 118.7(2) . . ?
C11A C10A N4A 124.2(2) . . ?
C11A C10A C9A 118.1(2) . . ?
N4A C10A C9A 117.7(2) . . ?
C10A C11A C12A 123.6(2) . . ?
C10A C11A H11A 118.2 . . ?
C12A C11A H11A 118.2 . . ?
N1A C12A C11A 119.6(2) . . ?
N1A C12A C7A 123.0(2) . . ?
C11A C12A C7A 117.4(2) . . ?
C14A C13A C18A 121.4(2) . . ?
C14A C13A N2A 119.1(2) . . ?
C18A C13A N2A 119.5(2) . . ?
C13A C14A C15A 119.4(3) . . ?
C13A C14A H14A 120.3 . . ?
C15A C14A H14A 120.3 . . ?
C16A C15A C14A 119.4(3) . . ?
C16A C15A H15A 120.3 . . ?
C14A C15A H15A 120.3 . . ?
C15A C16A C17A 121.2(3) . . ?
C15A C16A Cl1A 119.3(3) . . ?
C17A C16A Cl1A 119.6(3) . . ?
C16A C17A C18A 119.6(3) . . ?
C16A C17A H17A 120.2 . . ?
C18A C17A H17A 120.2 . . ?
C13A C18A C17A 119.0(3) . . ?
C13A C18A H18A 120.5 . . ?
C17A C18A H18A 120.5 . . ?
N3A C19A C21A 108.0(2) . . ?
N3A C19A C20A 111.0(2) . . ?
C21A C19A C20A 112.3(2) . . ?
N3A C19A H19A 108.5 . . ?
C21A C19A H19A 108.5 . . ?
C20A C19A H19A 108.5 . . ?
C19A C20A H20A 109.5 . . ?
C19A C20A H20B 109.5 . . ?
H20A C20A H20B 109.5 . . ?
C19A C20A H20C 109.5 . . ?
H20A C20A H20C 109.5 . . ?
H20B C20A H20C 109.5 . . ?
C19A C21A H21A 109.5 . . ?
C19A C21A H21B 109.5 . . ?
H21A C21A H21B 109.5 . . ?
C19A C21A H21C 109.5 . . ?
H21A C21A H21C 109.5 . . ?
H21B C21A H21C 109.5 . . ?
C23A C22A C27A 118.9(2) . . ?
C23A C22A N4A 123.3(2) . . ?
C27A C22A N4A 117.6(2) . . ?
C24A C23A C22A 120.5(2) . . ?
C24A C23A H23A 119.8 . . ?
C22A C23A H23A 119.8 . . ?
C25A C24A C23A 119.7(3) . . ?
C25A C24A H24A 120.2 . . ?
C23A C24A H24A 120.2 . . ?
C26A C25A C24A 121.0(2) . . ?
C26A C25A Cl2A 120.2(2) . . ?
C24A C25A Cl2A 118.8(2) . . ?
C25A C26A C27A 119.0(3) . . ?
C25A C26A H26A 120.5 . . ?
C27A C26A H26A 120.5 . . ?
C26A C27A C22A 121.0(3) . . ?
C26A C27A H27A 119.5 . . ?
C22A C27A H27A 119.5 . . ?
C12B N1B C1B 118.5(2) . . ?
C7B N2B C6B 121.5(2) . . ?
C7B N2B C13B 119.80(19) . . ?
C6B N2B C13B 118.70(19) . . ?
C9B N3B C19B 125.3(2) . . ?
C9B N3B H3B 117.4 . . ?
C19B N3B H3B 117.4 . . ?
C10B N4B C22B 123.4(2) . . ?
C10B N4B H4B 118.3 . . ?
C22B N4B H4B 118.3 . . ?
N1B C1B C2B 118.5(2) . . ?
N1B C1B C6B 122.3(2) . . ?
C2B C1B C6B 119.2(2) . . ?
C3B C2B C1B 120.3(3) . . ?
C3B C2B H2B 119.9 . . ?
C1B C2B H2B 119.9 . . ?
C2B C3B C4B 120.4(3) . . ?
C2B C3B H2 119.8 . . ?
C4B C3B H2 119.8 . . ?
C5B C4B C3B 121.0(3) . . ?
C5B C4B H4 119.5 . . ?
C3B C4B H4 119.5 . . ?
C4B C5B C6B 119.5(3) . . ?
C4B C5B H5B 120.3 . . ?
C6B C5B H5B 120.3 . . ?
N2B C6B C5B 122.5(2) . . ?
N2B C6B C1B 117.9(2) . . ?
C5B C6B C1B 119.6(2) . . ?
N2B C7B C8B 123.4(2) . . ?
N2B C7B C12B 117.0(2) . . ?
C8B C7B C12B 119.7(2) . . ?
C7B C8B C9B 121.6(2) . . ?
C7B C8B H8B 119.2 . . ?
C9B C8B H8B 119.2 . . ?
N3B C9B C8B 121.6(2) . . ?
N3B C9B C10B 119.0(2) . . ?
C8B C9B C10B 119.4(2) . . ?
N4B C10B C11B 122.5(2) . . ?
N4B C10B C9B 119.4(2) . . ?
C11B C10B C9B 118.1(2) . . ?
C10B C11B C12B 122.9(2) . . ?
C10B C11B H11B 118.6 . . ?
C12B C11B H11B 118.6 . . ?
N1B C12B C11B 118.9(2) . . ?
N1B C12B C7B 122.9(2) . . ?
C11B C12B C7B 118.2(2) . . ?
C18B C13B C14B 121.6(2) . . ?
C18B C13B N2B 119.6(2) . . ?
C14B C13B N2B 118.8(2) . . ?
C13B C14B C15B 119.0(2) . . ?
C13B C14B H14B 120.5 . . ?
C15B C14B H14B 120.5 . . ?
C16B C15B C14B 119.3(2) . . ?
C16B C15B H15B 120.4 . . ?
C14B C15B H15B 120.4 . . ?
C17B C16B C15B 121.5(2) . . ?
C17B C16B Cl1B 119.1(2) . . ?
C15B C16B Cl1B 119.4(2) . . ?
C16B C17B C18B 119.2(2) . . ?
C16B C17B H17B 120.4 . . ?
C18B C17B H17B 120.4 . . ?
C13B C18B C17B 119.3(2) . . ?
C13B C18B H18B 120.3 . . ?
C17B C18B H18B 120.3 . . ?
N3B C19B C21B 109.7(2) . . ?
N3B C19B C20B 109.9(2) . . ?
C21B C19B C20B 111.7(2) . . ?
N3B C19B H19B 108.5 . . ?
C21B C19B H19B 108.5 . . ?
C20B C19B H19B 108.5 . . ?
C19B C20B H20D 109.5 . . ?
C19B C20B H20E 109.5 . . ?
H20D C20B H20E 109.5 . . ?
C19B C20B H20F 109.5 . . ?
H20D C20B H20F 109.5 . . ?
H20E C20B H20F 109.5 . . ?
C19B C21B H21D 109.5 . . ?
C19B C21B H21E 109.5 . . ?
H21D C21B H21E 109.5 . . ?
C19B C21B H21F 109.5 . . ?
H21D C21B H21F 109.5 . . ?
H21E C21B H21F 109.5 . . ?
C23B C22B C27B 119.4(2) . . ?
C23B C22B N4B 119.4(2) . . ?
C27B C22B N4B 121.1(2) . . ?
C22B C23B C24B 120.2(3) . . ?
C22B C23B H23B 119.9 . . ?
C24B C23B H23B 119.9 . . ?
C25B C24B C23B 119.4(3) . . ?
C25B C24B H24B 120.3 . . ?
C23B C24B H24B 120.3 . . ?
C24B C25B C26B 121.3(2) . . ?
C24B C25B Cl2B 119.4(2) . . ?
C26B C25B Cl2B 119.3(2) . . ?
C25B C26B C27B 119.2(3) . . ?
C25B C26B H26B 120.4 . . ?
C27B C26B H26B 120.4 . . ?
C26B C27B C22B 120.4(2) . . ?
C26B C27B H27B 119.8 . . ?
C22B C27B H27B 119.8 . . ?
C1C O2C H2C 109.5 . . ?
C3C O3C H3C 109.5 . . ?
C5C O4C H4C 109.5 . . ?
O1C C1C O2C 122.6(3) . . ?
O1C C1C C2C 123.7(2) . . ?
O2C C1C C2C 113.7(2) . . ?
C1C C2C C3C 111.7(2) . . ?
C1C C2C H2C1 109.3 . . ?
C3C C2C H2C1 109.3 . . ?
C1C C2C H2C2 109.3 . . ?
C3C C2C H2C2 109.3 . . ?
H2C1 C2C H2C2 107.9 . . ?
O3C C3C C4C 106.4(2) . . ?
O3C C3C C2C 110.1(2) . . ?
C4C C3C C2C 107.9(2) . . ?
O3C C3C C6C 111.1(2) . . ?
C4C C3C C6C 111.7(2) . . ?
C2C C3C C6C 109.6(2) . . ?
C5C C4C C3C 114.9(2) . . ?
C5C C4C H4C1 108.6 . . ?
C3C C4C H4C1 108.6 . . ?
C5C C4C H4C2 108.6 . . ?
C3C C4C H4C2 108.6 . . ?
H4C1 C4C H4C2 107.5 . . ?
O5C C5C O4C 121.6(3) . . ?
O5C C5C C4C 126.4(3) . . ?
O4C C5C C4C 111.9(3) . . ?
O7C C6C O6C 126.3(2) . . ?
O7C C6C C3C 117.9(2) . . ?
O6C C6C C3C 115.8(2) . . ?
C1D O1D H1D 109.5 . . ?
C3D O3D H3D 109.5 . . ?
C5D O4D H4D 109.5 . . ?
O2D C1D O1D 122.9(3) . . ?
O2D C1D C2D 123.7(2) . . ?
O1D C1D C2D 113.4(2) . . ?
C1D C2D C3D 111.7(2) . . ?
C1D C2D H2D1 109.3 . . ?
C3D C2D H2D1 109.3 . . ?
C1D C2D H2D2 109.3 . . ?
C3D C2D H2D2 109.3 . . ?
H2D1 C2D H2D2 107.9 . . ?
O3D C3D C4D 105.01(19) . . ?
O3D C3D C2D 110.25(19) . . ?
C4D C3D C2D 108.2(2) . . ?
O3D C3D C6D 112.7(2) . . ?
C4D C3D C6D 110.4(2) . . ?
C2D C3D C6D 110.03(19) . . ?
C5D C4D C3D 112.6(2) . . ?
C5D C4D H4D1 109.1 . . ?
C3D C4D H4D1 109.1 . . ?
C5D C4D H4D2 109.1 . . ?
C3D C4D H4D2 109.1 . . ?
H4D1 C4D H4D2 107.8 . . ?
O5D C5D O4D 122.6(3) . . ?
O5D C5D C4D 123.1(2) . . ?
O4D C5D C4D 114.3(3) . . ?
O7D C6D O6D 125.0(2) . . ?
O7D C6D C3D 119.2(2) . . ?
O6D C6D C3D 115.8(2) . . ?
 
_refine_diff_density_max    0.281
_refine_diff_density_min   -0.352
_refine_diff_density_rms    0.050


_shelx_res_file
;

    C:\Frames\PB24cit\work1\PB24_0m.res created by SHELXL-2014/7

TITL PB24_0m_a.res in P-1
CELL 0.71073 14.7409 15.8211 16.2514 71.928 63.041 70.747
ZERR 4.0000 0.0006 0.0006 0.0007 0.001 0.001 0.002
LATT 1
SFAC C H N O CL
UNIT 132 120 16 28 8
MERG 2
FMAP 2
GRID
PLAN 5
TEMP 23
SIZE 0.3 0.3 0.1
BOND $H
L.S. 20
ACTA
WGHT    0.055200    1.487300
EXTI    0.002377
FVAR       0.10061
CL1A  5    0.875588    0.676928   -0.374143    11.00000    0.09351    0.07133 =
         0.04950   -0.02496   -0.00133    0.01983
CL2A  5    0.096156    0.809101    0.648620    11.00000    0.07510    0.09440 =
         0.04405   -0.03738    0.01044   -0.01238
N1A   3    0.364932    0.956019    0.064009    11.00000    0.03253    0.03040 =
         0.02636   -0.00553   -0.01135   -0.00527
N2A   3    0.531796    0.870878   -0.078926    11.00000    0.03349    0.03239 =
         0.01940   -0.00408   -0.00581   -0.01044
N3A   3    0.588549    0.614505    0.156894    11.00000    0.03174    0.02960 =
         0.02445   -0.00285   -0.00479   -0.00274
AFIX  43
H3A   2    0.564529    0.587839    0.214827    11.00000   -1.20000
AFIX   0
N4A   3    0.407444    0.689690    0.294388    11.00000    0.03413    0.02523 =
         0.02353   -0.00321   -0.00941   -0.00244
AFIX  43
H4A   2    0.438287    0.633043    0.302480    11.00000   -1.20000
AFIX   0
C1A   1    0.392985    0.998888   -0.028160    11.00000    0.03177    0.02907 =
         0.02860   -0.00138   -0.01404   -0.01044
C2A   1    0.336836    1.087127   -0.051067    11.00000    0.03499    0.03586 =
         0.03530   -0.00558   -0.01470   -0.00967
AFIX  43
H2A   2    0.283094    1.116026   -0.003195    11.00000   -1.20000
AFIX   0
C3A   1    0.359749    1.131443   -0.142634    11.00000    0.04638    0.03280 =
         0.04416    0.00491   -0.02529   -0.01088
AFIX  43
H1    2    0.321500    1.189799   -0.156656    11.00000   -1.20000
AFIX   0
C4A   1    0.440584    1.088863   -0.214824    11.00000    0.04897    0.04678 =
         0.03073    0.00957   -0.01895   -0.02001
AFIX  43
H3    2    0.455547    1.119102   -0.276950    11.00000   -1.20000
AFIX   0
C5A   1    0.498151    1.003419   -0.195726    11.00000    0.04445    0.04552 =
         0.02500    0.00072   -0.01177   -0.01485
AFIX  43
H5A   2    0.552085    0.975878   -0.244513    11.00000   -1.20000
AFIX   0
C6A   1    0.475543    0.957598   -0.102433    11.00000    0.03373    0.03156 =
         0.02800   -0.00170   -0.01416   -0.01294
C7A   1    0.507457    0.826060    0.012684    11.00000    0.02812    0.03059 =
         0.02171   -0.00497   -0.00814   -0.01007
C8A   1    0.561932    0.740727    0.038262    11.00000    0.02986    0.03041 =
         0.02511   -0.01011   -0.00459   -0.00504
AFIX  43
H8A   2    0.619650    0.712524   -0.007933    11.00000   -1.20000
AFIX   0
C9A   1    0.532906    0.694795    0.132321    11.00000    0.02833    0.02713 =
         0.02469   -0.00602   -0.00887   -0.00898
C10A  1    0.438491    0.738348    0.204614    11.00000    0.02938    0.02918 =
         0.01976   -0.00502   -0.00768   -0.00857
C11A  1    0.388948    0.824696    0.177905    11.00000    0.02934    0.02925 =
         0.02175   -0.00810   -0.00579   -0.00199
AFIX  43
H11A  2    0.332233    0.853730    0.224084    11.00000   -1.20000
AFIX   0
C12A  1    0.418849    0.872711    0.083937    11.00000    0.02965    0.02714 =
         0.02397   -0.00585   -0.00980   -0.00875
C13A  1    0.616475    0.824667   -0.152779    11.00000    0.03731    0.03680 =
         0.01889   -0.00506   -0.00720   -0.00716
C14A  1    0.595410    0.769591   -0.189196    11.00000    0.04796    0.05778 =
         0.04179   -0.01970   -0.00790   -0.01603
AFIX  43
H14A  2    0.527596    0.762704   -0.167733    11.00000   -1.20000
AFIX   0
C15A  1    0.675964    0.724218   -0.258279    11.00000    0.08002    0.05477 =
         0.04337   -0.02182   -0.01636   -0.01471
AFIX  43
H15A  2    0.662627    0.687141   -0.284211    11.00000   -1.20000
AFIX   0
C16A  1    0.774857    0.734316   -0.287945    11.00000    0.05405    0.04876 =
         0.02601   -0.00790   -0.00644    0.00478
C17A  1    0.795876    0.789767   -0.251641    11.00000    0.03629    0.08696 =
         0.03446   -0.01362   -0.00367   -0.01095
AFIX  43
H17A  2    0.863856    0.796054   -0.272689    11.00000   -1.20000
AFIX   0
C18A  1    0.715482    0.836267   -0.183597    11.00000    0.04046    0.06696 =
         0.02823   -0.01158   -0.00521   -0.01927
AFIX  43
H18A  2    0.728495    0.874863   -0.159127    11.00000   -1.20000
AFIX   0
C19A  1    0.688109    0.566674    0.093754    11.00000    0.02740    0.03342 =
         0.03267   -0.01004   -0.00195   -0.00437
AFIX  13
H19A  2    0.729409    0.611699    0.050366    11.00000   -1.20000
AFIX   0
C20A  1    0.669941    0.518904    0.036554    11.00000    0.05406    0.05730 =
         0.05958   -0.03286   -0.01418   -0.00360
AFIX 137
H20A  2    0.631027    0.473445    0.078069    11.00000   -1.50000
H20B  2    0.735941    0.490323   -0.005881    11.00000   -1.50000
H20C  2    0.631359    0.562718    0.001284    11.00000   -1.50000
AFIX   0
C21A  1    0.746309    0.501273    0.152857    11.00000    0.03412    0.04681 =
         0.05574   -0.00857   -0.01275    0.00153
AFIX 137
H21A  2    0.759920    0.534727    0.184672    11.00000   -1.50000
H21B  2    0.811219    0.468492    0.113137    11.00000   -1.50000
H21C  2    0.704836    0.458969    0.198384    11.00000   -1.50000
AFIX   0
C22A  1    0.329905    0.723205    0.374943    11.00000    0.02734    0.03205 =
         0.01945   -0.00517   -0.00789   -0.00421
C23A  1    0.316615    0.808389    0.390274    11.00000    0.04357    0.03325 =
         0.02384   -0.00278   -0.01103   -0.01100
AFIX  43
H23A  2    0.357152    0.848163    0.344068    11.00000   -1.20000
AFIX   0
C24A  1    0.243740    0.834851    0.473525    11.00000    0.05004    0.03627 =
         0.03470   -0.01265   -0.01817   -0.00141
AFIX  43
H24A  2    0.234289    0.892636    0.483171    11.00000   -1.20000
AFIX   0
C25A  1    0.184995    0.775367    0.542342    11.00000    0.04114    0.05304 =
         0.02866   -0.01393   -0.00537   -0.00239
C26A  1    0.197937    0.689798    0.529385    11.00000    0.05170    0.04969 =
         0.03308   -0.00585    0.00260   -0.01802
AFIX  43
H26A  2    0.158782    0.649592    0.576661    11.00000   -1.20000
AFIX   0
C27A  1    0.269726    0.664333    0.445385    11.00000    0.04416    0.03161 =
         0.03208   -0.00823   -0.00197   -0.01074
AFIX  43
H27A  2    0.278026    0.606849    0.435693    11.00000   -1.20000
AFIX   0
CL1B  5   -0.108025   -0.081795    1.523947    11.00000    0.07930    0.06839 =
         0.03458   -0.02200   -0.01162   -0.00790
CL2B  5    0.407130    0.004757    0.429684    11.00000    0.09196    0.10605 =
         0.03610   -0.03360   -0.00382   -0.01600
N1B   3    0.300515   -0.200962    0.966075    11.00000    0.04028    0.02597 =
         0.03201   -0.00635   -0.01698   -0.00363
N2B   3    0.159693   -0.159222    1.141631    11.00000    0.03819    0.02532 =
         0.02329   -0.00438   -0.01312   -0.00647
N3B   3    0.044415    0.141096    0.984638    11.00000    0.04232    0.02353 =
         0.02451   -0.00313   -0.01173   -0.00405
AFIX  43
H3B   2    0.044879    0.175635    0.931908    11.00000   -1.20000
AFIX   0
N4B   3    0.171664    0.090073    0.810879    11.00000    0.05399    0.02249 =
         0.02648   -0.00468   -0.01840   -0.00139
AFIX  43
H4B   2    0.134464    0.144531    0.815402    11.00000   -1.20000
AFIX   0
C1B   1    0.296025   -0.264050    1.046657    11.00000    0.03939    0.02545 =
         0.03463   -0.00658   -0.02068   -0.00494
C2B   1    0.364262   -0.350335    1.039012    11.00000    0.04814    0.02778 =
         0.04743   -0.00785   -0.02379   -0.00242
AFIX  43
H2B   2    0.411161   -0.363196    0.980057    11.00000   -1.20000
AFIX   0
C3B   1    0.361950   -0.415037    1.117463    11.00000    0.05754    0.02864 =
         0.05959   -0.00792   -0.03512    0.00029
AFIX  43
H2    2    0.407158   -0.472021    1.111847    11.00000   -1.20000
AFIX   0
C4B   1    0.292439   -0.396576    1.206046    11.00000    0.06272    0.03226 =
         0.04904    0.00495   -0.03682   -0.01184
AFIX  43
H4    2    0.291530   -0.441563    1.259084    11.00000   -1.20000
AFIX   0
C5B   1    0.225149   -0.312950    1.216371    11.00000    0.05102    0.03028 =
         0.03739   -0.00132   -0.02286   -0.01019
AFIX  43
H5B   2    0.179783   -0.301012    1.276012    11.00000   -1.20000
AFIX   0
C6B   1    0.225342   -0.245646    1.136279    11.00000    0.04078    0.02458 =
         0.03496   -0.00299   -0.02310   -0.00725
C7B   1    0.161189   -0.094756    1.062610    11.00000    0.03597    0.02534 =
         0.02546   -0.00438   -0.01366   -0.00950
C8B   1    0.097182   -0.008364    1.064699    11.00000    0.03761    0.02808 =
         0.02477   -0.00662   -0.01064   -0.00584
AFIX  43
H8B   2    0.049650    0.007307    1.122366    11.00000   -1.20000
AFIX   0
C9B   1    0.102153    0.055831    0.982476    11.00000    0.03240    0.02352 =
         0.02742   -0.00550   -0.01299   -0.00755
C10B  1    0.172305    0.029590    0.891235    11.00000    0.03917    0.02470 =
         0.02390   -0.00499   -0.01465   -0.00902
C11B  1    0.237505   -0.055554    0.890598    11.00000    0.03971    0.02965 =
         0.02134   -0.00800   -0.01070   -0.00529
AFIX  43
H11B  2    0.285060   -0.071358    0.832995    11.00000   -1.20000
AFIX   0
C12B  1    0.235533   -0.119871    0.973178    11.00000    0.03517    0.02651 =
         0.02805   -0.00841   -0.01509   -0.00561
C13B  1    0.090538   -0.136949    1.234106    11.00000    0.03810    0.02520 =
         0.02345   -0.00166   -0.01727   -0.00443
C14B  1    0.112281   -0.077075    1.265172    11.00000    0.03831    0.03287 =
         0.03805   -0.00697   -0.01677   -0.01041
AFIX  43
H14B  2    0.167847   -0.048917    1.226405    11.00000   -1.20000
AFIX   0
C15B  1    0.050343   -0.059471    1.354748    11.00000    0.05236    0.03867 =
         0.04230   -0.01575   -0.02459   -0.00664
AFIX  43
H15B  2    0.063126   -0.018619    1.376703    11.00000   -1.20000
AFIX   0
C16B  1   -0.030703   -0.103169    1.411286    11.00000    0.04779    0.03621 =
         0.02516   -0.00675   -0.01710   -0.00135
C17B  1   -0.052619   -0.162209    1.379784    11.00000    0.04486    0.04030 =
         0.03046   -0.00164   -0.01378   -0.01402
AFIX  43
H17B  2   -0.107821   -0.190784    1.418647    11.00000   -1.20000
AFIX   0
C18B  1    0.008338   -0.178698    1.289599    11.00000    0.04558    0.02993 =
         0.03267   -0.00161   -0.02029   -0.01324
AFIX  43
H18B  2   -0.006194   -0.217669    1.266763    11.00000   -1.20000
AFIX   0
C19B  1   -0.019518    0.180348    1.069582    11.00000    0.04053    0.02998 =
         0.02890   -0.00506    0.00058   -0.00838
AFIX  13
H19B  2   -0.056061    0.134905    1.119313    11.00000   -1.20000
AFIX   0
C20B  1    0.049617    0.203100    1.101930    11.00000    0.07186    0.06400 =
         0.05151   -0.03454   -0.02555    0.00410
AFIX 137
H20D  2    0.092773    0.147805    1.122099    11.00000   -1.50000
H20E  2    0.006933    0.234851    1.153341    11.00000   -1.50000
H20F  2    0.093009    0.241081    1.050872    11.00000   -1.50000
AFIX   0
C21B  1   -0.099475    0.262906    1.050482    11.00000    0.03806    0.03780 =
         0.06872   -0.01642   -0.00723   -0.00187
AFIX 137
H21D  2   -0.064861    0.309099    1.003732    11.00000   -1.50000
H21E  2   -0.144405    0.285907    1.107420    11.00000   -1.50000
H21F  2   -0.140256    0.246474    1.028086    11.00000   -1.50000
AFIX   0
C22B  1    0.229245    0.067897    0.719974    11.00000    0.04366    0.02727 =
         0.02555   -0.00299   -0.01904   -0.00451
C23B  1    0.286901    0.126836    0.648310    11.00000    0.05592    0.02834 =
         0.03686   -0.00380   -0.02029   -0.01055
AFIX  43
H23B  2    0.289390    0.179645    0.660288    11.00000   -1.20000
AFIX   0
C24B  1    0.340982    0.107695    0.558775    11.00000    0.05736    0.04656 =
         0.03159    0.00349   -0.00900   -0.02098
AFIX  43
H24B  2    0.379623    0.147556    0.510268    11.00000   -1.20000
AFIX   0
C25B  1    0.337224    0.029729    0.542089    11.00000    0.05441    0.04786 =
         0.02523   -0.01269   -0.01208   -0.00577
C26B  1    0.279469   -0.029426    0.612283    11.00000    0.06956    0.03389 =
         0.03432   -0.00922   -0.02392   -0.00965
AFIX  43
H26B  2    0.277515   -0.082237    0.599897    11.00000   -1.20000
AFIX   0
C27B  1    0.224629   -0.009707    0.700980    11.00000    0.06073    0.03388 =
         0.02653   -0.00074   -0.01873   -0.01749
AFIX  43
H27B  2    0.184110   -0.048741    0.748623    11.00000   -1.20000
AFIX   0
O1C   4    0.338645    0.449115    0.576791    11.00000    0.05468    0.03757 =
         0.04083   -0.00346   -0.00978   -0.00156
O2C   4    0.392991    0.310335    0.648405    11.00000    0.05079    0.05541 =
         0.03539    0.00928   -0.01269   -0.00332
AFIX 147
H2C   2    0.332578    0.319675    0.686981    11.00000   -1.20000
AFIX   0
O3C   4    0.422392    0.288578    0.441299    11.00000    0.04676    0.02985 =
         0.04876   -0.00167   -0.01583   -0.01053
AFIX 147
H3C   2    0.360877    0.315618    0.457120    11.00000   -1.20000
AFIX   0
O4C   4    0.658955    0.234117    0.214457    11.00000    0.06990    0.05713 =
         0.04435   -0.02460   -0.01895    0.01193
AFIX 147
H4C   2    0.660252    0.235795    0.163001    11.00000   -1.20000
AFIX   0
O5C   4    0.530190    0.355139    0.213034    11.00000    0.06661    0.05450 =
         0.04877   -0.01955   -0.02768    0.00476
O6C   4    0.489347    0.504811    0.330259    11.00000    0.04926    0.02696 =
         0.03835    0.00217   -0.00849   -0.00757
O7C   4    0.343237    0.458566    0.375292    11.00000    0.03775    0.05119 =
         0.03296    0.00238   -0.01540   -0.00208
C1C   1    0.404627    0.378526    0.576180    11.00000    0.04823    0.04027 =
         0.02832   -0.00182   -0.01882   -0.01205
C2C   1    0.504607    0.359702    0.493313    11.00000    0.03898    0.03837 =
         0.03289   -0.00224   -0.01777   -0.00335
AFIX  23
H2C1  2    0.549217    0.303387    0.511580    11.00000   -1.20000
H2C2  2    0.540515    0.408556    0.473253    11.00000   -1.20000
AFIX   0
C3C   1    0.485547    0.351601    0.410514    11.00000    0.03687    0.02611 =
         0.02920   -0.00009   -0.01110   -0.00751
C4C   1    0.590326    0.311945    0.338838    11.00000    0.04074    0.03229 =
         0.03759   -0.00657   -0.01351    0.00004
AFIX  23
H4C1  2    0.638478    0.349932    0.321708    11.00000   -1.20000
H4C2  2    0.617989    0.251777    0.368381    11.00000   -1.20000
AFIX   0
C5C   1    0.586751    0.304147    0.250996    11.00000    0.03985    0.03236 =
         0.03670   -0.01025   -0.00569   -0.00501
C6C   1    0.434533    0.446326    0.367657    11.00000    0.04121    0.03010 =
         0.02278   -0.00285   -0.01044   -0.00213
O1D   4    0.152478    0.477837    0.506141    11.00000    0.05221    0.04460 =
         0.03591    0.00515   -0.01027   -0.00485
AFIX 147
H1D   2    0.208963    0.463771    0.463575    11.00000   -1.20000
AFIX   0
O2D   4    0.193539    0.332531    0.570455    11.00000    0.07698    0.03372 =
         0.04167   -0.00805   -0.01318    0.00112
O3D   4    0.129081    0.493018    0.709945    11.00000    0.04100    0.02722 =
         0.03977   -0.00697   -0.01113   -0.00973
AFIX 147
H3D   2    0.189155    0.469559    0.678678    11.00000   -1.20000
AFIX   0
O4D   4   -0.062728    0.565916    0.915745    11.00000    0.07271    0.04095 =
         0.05477   -0.02515   -0.02850    0.00407
AFIX 147
H4D   2   -0.052639    0.568477    0.960473    11.00000   -1.20000
AFIX   0
O5D   4    0.031895    0.425824    0.936325    11.00000    0.05924    0.03459 =
         0.03982   -0.01230   -0.02144   -0.00421
O6D   4    0.055940    0.276907    0.819275    11.00000    0.06002    0.02689 =
         0.03371   -0.00087   -0.02060   -0.01536
O7D   4    0.205154    0.316238    0.775508    11.00000    0.04126    0.04211 =
         0.03849   -0.00040   -0.01793   -0.00040
C1D   1    0.135217    0.406835    0.574936    11.00000    0.05311    0.03232 =
         0.02881   -0.00464   -0.02183   -0.00898
C2D   1    0.038498    0.428284    0.660027    11.00000    0.04283    0.03033 =
         0.03119   -0.00290   -0.01733   -0.00608
AFIX  23
H2D1  2   -0.001744    0.382424    0.681139    11.00000   -1.20000
H2D2  2   -0.004062    0.486885    0.643396    11.00000   -1.20000
AFIX   0
C3D   1    0.064671    0.431032    0.741003    11.00000    0.03861    0.02207 =
         0.02718   -0.00455   -0.01085   -0.00780
C4D   1   -0.036443    0.470691    0.817045    11.00000    0.04136    0.03157 =
         0.03758   -0.00939   -0.01641   -0.00267
AFIX  23
H4D1  2   -0.069938    0.528559    0.788681    11.00000   -1.20000
H4D2  2   -0.083463    0.429663    0.843171    11.00000   -1.20000
AFIX   0
C5D   1   -0.018356    0.485043    0.894809    11.00000    0.03618    0.02785 =
         0.03321   -0.01046   -0.00158   -0.00965
C6D   1    0.113930    0.333351    0.781638    11.00000    0.04575    0.02848 =
         0.01845   -0.00581   -0.01168   -0.00514
HKLF 4

REM  PB24_0m_a.res in P-1
REM R1 =  0.0629 for    7961 Fo > 4sig(Fo)  and  0.1442 for all   14446 data
REM    840 parameters refined using      0 restraints

END

WGHT      0.0549      1.4967

REM Highest difference peak  0.281,  deepest hole -0.352,  1-sigma level  0.050
Q1    1   0.8272  0.7212 -0.3975  11.00000  0.05    0.28
Q2    1   0.8330  0.6284 -0.3437  11.00000  0.05    0.28
Q3    1   0.9036  0.6936 -0.3419  11.00000  0.05    0.27
Q4    1   0.1490  0.7671  0.6714  11.00000  0.05    0.25
Q5    1   0.3982  0.6321  0.2968  11.00000  0.05    0.24
;
_shelx_res_checksum   59786

_shelx_hkl_file
;
  -2   0   0   27.29    0.64
  -2   0   0   29.47    0.78
   2   0   0   29.00    0.63
   2   0   0   28.74    0.62
   2   0   0   28.79    0.68
   2   0   0   28.59    0.66
  -3   0   0    8.63    0.42
  -3   0   0    8.62    0.49
  -3   0   0    8.67    0.38
  -3   0   0    8.92    0.39
  -3   0   0    8.64    0.41
  -3   0   0    8.82    0.44
  -3   0   0    8.50    0.40
  -3   0   0    9.44    0.49
  -3   0   0    8.46    0.25
  -3   0   0    9.02    0.52
   3   0   0    8.02    0.40
   3   0   0    8.74    0.48
   3   0   0    8.49    0.42
   3   0   0    8.08    0.41
   3   0   0    8.35    0.41
   3   0   0    8.13    0.53
   3   0   0    8.39    0.24
   3   0   0    8.82    0.48
   3   0   0    8.72    0.41
  -4   0   0   72.69    1.51
  -4   0   0   72.19    1.54
  -4   0   0   74.32    1.47
  -4   0   0   72.73    1.47
  -4   0   0   72.53    1.53
  -4   0   0   72.17    1.50
  -4   0   0   76.68    1.61
  -4   0   0   75.04    1.65
  -4   0   0   70.65    1.29
  -4   0   0   63.99    1.99
   4   0   0   73.90    1.60
   4   0   0   70.50    1.53
   4   0   0   71.76    1.47
   4   0   0   72.05    1.47
   4   0   0   72.10    1.51
   4   0   0   72.32    1.64
   4   0   0   72.33    1.29
   4   0   0   71.16    1.51
  -5   0   0    0.79    0.27
  -5   0   0    1.15    0.31
  -5   0   0    0.92    0.28
  -5   0   0    0.39    0.39
  -5   0   0    0.50    0.14
  -5   0   0    0.98    0.37
  -5   0   0    0.68    0.26
  -5   0   0    0.53    0.28
  -5   0   0    0.91    0.30
   5   0   0    0.43    0.14
   5   0   0    0.69    0.31
   5   0   0    0.83    0.37
   5   0   0    0.96    0.42
   5   0   0    0.47    0.27
   5   0   0    0.73    0.27
   5   0   0    0.59    0.26
   5   0   0    0.79    0.30
   5   0   0    0.82    0.37
   5   0   0    0.54    0.27
  -6   0   0    4.91    0.53
  -6   0   0    3.41    0.52
  -6   0   0    3.69    0.43
  -6   0   0    4.36    0.49
  -6   0   0    3.78    0.41
  -6   0   0    3.89    0.24
  -6   0   0    3.78    0.48
  -6   0   0    4.30    0.46
  -6   0   0    3.88    0.43
  -6   0   0    4.30    0.48
   6   0   0    3.96    0.23
   6   0   0    4.36    0.51
   6   0   0    3.79    0.53
   6   0   0    4.31    0.48
   6   0   0    4.00    0.47
   6   0   0    4.18    0.49
   6   0   0    5.00    0.56
   6   0   0    4.09    0.47
   6   0   0    3.33    0.49
   6   0   0    4.06    0.42
  -7   0   0    5.27    0.55
  -7   0   0    4.74    0.53
  -7   0   0    6.01    0.64
  -7   0   0    4.39    0.60
  -7   0   0    4.63    0.61
  -7   0   0    4.62    0.56
  -7   0   0    5.63    0.68
  -7   0   0    4.52    0.24
  -7   0   0    3.63    0.52
  -7   0   0    4.57    0.55
   7   0   0    5.37    0.57
   7   0   0    4.34    0.59
   7   0   0    4.46    0.59
   7   0   0    4.23    0.54
   7   0   0    4.58    0.50
   7   0   0    4.64    0.64
   7   0   0    4.52    0.59
   7   0   0    4.13    0.58
  -8   0   0   -0.07    0.61
  -8   0   0    0.07    0.46
  -8   0   0    0.10    0.37
  -8   0   0    0.35    0.38
  -8   0   0    0.19    0.40
  -8   0   0   -0.29    0.32
  -8   0   0    0.12    0.35
  -8   0   0    0.10    0.37
  -8   0   0    0.63    0.52
   8   0   0    0.08    0.35
   8   0   0   -0.22    0.49
   8   0   0    0.34    0.38
   8   0   0    0.60    0.36
   8   0   0   -0.04    0.52
   8   0   0    0.32    0.51
   8   0   0    0.01    0.38
   8   0   0   -0.79    0.36
   8   0   0    0.62    0.38
  -9   0   0    1.71    0.48
  -9   0   0    1.62    0.48
  -9   0   0    1.16    0.47
  -9   0   0    1.40    0.71
  -9   0   0    1.77    0.70
  -9   0   0    0.72    0.56
  -9   0   0    0.72    0.43
  -9   0   0    0.77    0.46
  -9   0   0    1.40    0.44
   9   0   0    0.94    0.63
   9   0   0    1.04    0.40
   9   0   0    1.19    0.49
   9   0   0    1.06    0.60
   9   0   0    0.78    0.44
   9   0   0    2.15    0.68
   9   0   0    1.77    0.48
   9   0   0    1.58    0.47
   9   0   0    0.69    0.50
 -10   0   0    4.94    0.62
 -10   0   0    4.50    0.98
 -10   0   0    5.08    0.65
 -10   0   0    4.25    0.74
 -10   0   0    3.66    0.68
 -10   0   0    5.28    0.63
 -10   0   0    4.61    0.64
 -10   0   0    5.29    0.87
 -10   0   0    4.10    0.73
  10   0   0    4.50    0.67
  10   0   0    5.49    0.79
  10   0   0    5.09    0.65
  10   0   0    3.51    0.79
  10   0   0    4.83    0.65
  10   0   0    5.08    0.68
  10   0   0    4.65    0.62
  10   0   0    5.32    0.62
 -11   0   0    8.05    0.95
 -11   0   0    8.00    0.99
 -11   0   0   10.10    1.00
 -11   0   0    8.40    1.03
 -11   0   0    8.31    1.11
 -11   0   0    9.74    0.96
  11   0   0    8.23    0.93
  11   0   0    7.26    1.07
  11   0   0    9.85    1.03
  11   0   0    7.88    0.81
  11   0   0   10.04    1.17
  11   0   0    9.48    1.12
  11   0   0    9.74    1.04
 -12   0   0    1.74    0.75
 -12   0   0    0.64    0.83
 -12   0   0    1.92    0.69
 -12   0   0    0.63    0.66
 -12   0   0    1.03    0.67
  12   0   0    1.44    0.94
  12   0   0    1.28    0.76
  12   0   0    0.25    0.69
  12   0   0   -0.70    0.59
  12   0   0    1.27    0.61
  12   0   0   -0.57    0.63
  12   0   0    1.21    0.80
 -13   0   0    1.71    0.93
 -13   0   0    3.55    0.82
 -13   0   0    3.75    0.81
 -13   0   0    3.69    0.87
 -13   0   0    1.64    0.81
 -13   0   0    2.85    0.88
  13   0   0    2.53    0.74
  13   0   0    2.39    0.89
  13   0   0    2.05    1.06
  13   0   0    5.18    0.91
  13   0   0    2.90    1.04
  13   0   0    2.47    0.85
  13   0   0    3.60    0.98
 -14   0   0    0.86    0.94
 -14   0   0    2.87    0.96
 -14   0   0    0.19    1.06
 -14   0   0   -0.06    0.82
  14   0   0   -0.78    0.89
  14   0   0   -0.11    0.86
  14   0   0    0.85    1.23
  14   0   0   -0.17    0.97
 -15   0   0    2.13    1.23
 -15   0   0    1.61    1.33
 -15   0   0    0.45    1.06
 -15   0   0   -1.14    0.92
  15   0   0    1.30    1.10
  15   0   0    0.20    1.00
  15   0   0    1.45    1.17
 -16   0   0    1.67    1.28
 -16   0   0   -0.72    1.48
 -16   0   0    3.25    1.48
  16   0   0    1.98    1.41
  16   0   0    0.35    1.18
  16  -1   0   -0.20    1.62
  16  -1   0    0.92    1.34
  16  -1   0   -1.63    1.21
 -16   1   0    0.52    1.28
 -16   1   0   -0.24    1.51
 -16   1   0    1.21    1.73
 -16   1   0    1.90    1.73
  15  -1   0    3.30    1.14
  15  -1   0    3.61    1.23
  15  -1   0    1.72    1.29
  15  -1   0    1.95    1.41
 -15   1   0    4.19    1.30
 -15   1   0    4.58    1.16
 -15   1   0    6.24    1.29
  14  -1   0    7.60    1.04
  14  -1   0    6.57    1.23
  14  -1   0    7.00    1.20
  14  -1   0    7.93    1.44
 -14   1   0    7.43    1.15
 -14   1   0    7.93    1.12
 -14   1   0    7.64    1.27
 -14   1   0    5.40    1.29
  13  -1   0    1.78    0.79
  13  -1   0    0.73    0.94
  13  -1   0    0.90    1.10
  13  -1   0    0.21    0.88
  13  -1   0    0.24    0.90
  13  -1   0    1.08    0.89
 -13   1   0    1.06    0.87
 -13   1   0    0.55    0.92
 -13   1   0    1.34    0.79
 -13   1   0   -0.26    0.85
 -13   1   0    1.54    0.81
  12  -1   0    0.30    0.72
  12  -1   0    0.47    0.82
  12  -1   0    1.15    0.84
  12  -1   0   -0.27    0.62
  12  -1   0    0.76    0.66
  12  -1   0    0.96    0.96
  12  -1   0    0.54    0.72
 -12   1   0   -0.18    0.64
 -12   1   0    0.90    0.89
 -12   1   0    0.37    0.74
 -12   1   0    0.35    0.70
 -12   1   0    0.56    0.71
 -12   1   0   -0.33    0.72
  11  -1   0    6.63    0.79
  11  -1   0    6.07    0.83
  11  -1   0    6.64    1.03
  11  -1   0    5.67    0.78
  11  -1   0    6.18    0.91
  11  -1   0    5.01    0.72
  11  -1   0    5.90    0.86
 -11   1   0    5.69    0.80
 -11   1   0    5.87    0.78
 -11   1   0    5.35    0.82
 -11   1   0    5.32    0.92
 -11   1   0    5.39    0.78
 -11   1   0    6.36    0.80
  10  -1   0    4.55    0.65
  10  -1   0    2.73    0.64
  10  -1   0    4.96    0.83
  10  -1   0    3.77    0.71
  10  -1   0    3.70    0.67
  10  -1   0    3.71    0.85
  10  -1   0    3.28    0.69
 -10   1   0    2.72    0.59
 -10   1   0    4.41    0.70
 -10   1   0    3.83    0.82
 -10   1   0    4.42    0.67
 -10   1   0    3.85    0.74
 -10   1   0    4.62    0.78
 -10   1   0    4.93    0.67
   9  -1   0    2.74    0.52
   9  -1   0    1.96    0.58
   9  -1   0    2.90    0.66
   9  -1   0    2.75    0.63
   9  -1   0    3.36    0.57
   9  -1   0    2.55    0.53
   9  -1   0    1.91    0.71
   9  -1   0    1.76    0.56
   9  -1   0    1.12    0.44
  -9   1   0    2.73    0.65
  -9   1   0    3.42    0.59
  -9   1   0    2.81    0.55
  -9   1   0    2.70    0.56
  -9   1   0    3.02    0.72
  -9   1   0    1.58    0.54
  -9   1   0    2.24    0.49
  -9   1   0    3.20    0.57
  -9   1   0    3.64    0.83
   8  -1   0    2.45    0.47
   8  -1   0    2.80    0.57
   8  -1   0    1.63    0.62
   8  -1   0    2.24    0.45
   8  -1   0    2.46    0.51
   8  -1   0    1.96    0.46
   8  -1   0    1.90    0.52
   8  -1   0    2.75    0.64
  -8   1   0    2.92    0.46
  -8   1   0    1.38    0.45
  -8   1   0    1.80    0.50
  -8   1   0    2.52    0.55
  -8   1   0    3.15    0.73
  -8   1   0    2.20    0.49
  -8   1   0    1.76    0.50
  -8   1   0    3.21    0.65
  -8   1   0    2.45    0.49
   7  -1   0    0.75    0.35
   7  -1   0    0.52    0.40
   7  -1   0    0.39    0.43
   7  -1   0    0.11    0.47
   7  -1   0    0.23    0.47
   7  -1   0    0.73    0.42
   7  -1   0    0.57    0.36
   7  -1   0    0.37    0.34
  -7   1   0    0.28    0.48
  -7   1   0    0.92    0.38
  -7   1   0    0.21    0.42
  -7   1   0    0.32    0.35
  -7   1   0    1.19    0.40
  -7   1   0    0.72    0.51
  -7   1   0    0.93    0.40
  -7   1   0    0.13    0.35
  -7   1   0    0.40    0.38
   6  -1   0    4.74    0.54
   6  -1   0    5.31    0.67
   6  -1   0    5.32    0.56
   6  -1   0    5.67    0.57
   6  -1   0    5.37    0.68
   6  -1   0    5.38    0.59
   6  -1   0    5.93    0.73
  -6   1   0    5.59    0.57
  -6   1   0    6.12    0.65
  -6   1   0    5.39    0.58
  -6   1   0    7.10    0.76
  -6   1   0    6.09    0.67
  -6   1   0    5.06    0.55
  -6   1   0    6.06    0.60
  -6   1   0    4.67    0.61
  -6   1   0    6.77    0.61
   5  -1   0    2.78    0.50
   5  -1   0    2.59    0.38
   5  -1   0    2.30    0.36
   5  -1   0    2.52    0.42
   5  -1   0    2.65    0.37
   5  -1   0    2.85    0.44
   5  -1   0    1.76    0.37
  -5   1   0    1.86    0.36
  -5   1   0    2.24    0.36
  -5   1   0    2.42    0.35
  -5   1   0    1.97    0.39
  -5   1   0    2.28    0.35
  -5   1   0    1.84    0.41
  -5   1   0    2.65    0.50
  -5   1   0    1.95    0.38
  -5   1   0    3.02    0.38
   4  -1   0    5.73    0.56
   4  -1   0    7.28    0.49
   4  -1   0    6.20    0.58
   4  -1   0    6.71    0.55
   4  -1   0    6.93    0.49
   4  -1   0    6.65    0.50
  -4   1   0    6.49    0.48
  -4   1   0    5.96    0.55
  -4   1   0    6.71    0.54
  -4   1   0    7.41    0.49
  -4   1   0    6.44    0.51
  -4   1   0    6.54    0.50
  -4   1   0    7.38    0.59
  -4   1   0    6.67    0.49
  -4   1   0    5.99    0.53
   3  -1   0   28.17    0.80
   3  -1   0   28.38    0.77
   3  -1   0   28.31    0.80
   3  -1   0   28.65    0.82
   3  -1   0   29.31    0.86
   3  -1   0   28.37    0.79
   3  -1   0   28.35    0.76
  -3   1   0   27.30    0.77
  -3   1   0   28.18    0.84
  -3   1   0   29.79    0.80
  -3   1   0   28.94    0.77
  -3   1   0   26.90    0.80
  -3   1   0   28.94    0.77
  -3   1   0   28.55    0.81
  -3   1   0   27.77    0.78
   2  -1   0    0.04    0.19
   2  -1   0    0.06    0.22
   2  -1   0   -0.09    0.22
   2  -1   0    0.07    0.19
   2  -1   0    0.13    0.19
   2  -1   0   -0.38    0.22
   2  -1   0   -0.03    0.18
  -2   1   0    0.26    0.19
  -2   1   0   -0.19    0.22
  -2   1   0    0.20    0.18
  -2   1   0    0.46    0.20
  -2   1   0    0.13    0.24
  -2   1   0    0.14    0.21
  -2   1   0    0.19    0.21
  -2   1   0   -0.08    0.22
  -2   1   0    0.22    0.20
   1  -1   0    0.00    0.12
   1  -1   0   -0.06    0.13
   1  -1   0   -0.02    0.07
  -2  -1   0   40.64    0.89
  -2  -1   0   38.70    0.89
  -2  -1   0   40.74    0.89
  -2  -1   0   40.10    0.79
  -2  -1   0   38.11    0.80
   2   1   0   39.32    0.75
   2   1   0   40.94    0.84
   2   1   0   41.03    0.80
   2   1   0   40.60    0.79
   2   1   0   39.63    0.75
  -3  -1   0  110.14    2.14
  -3  -1   0  109.38    2.04
  -3  -1   0  111.96    2.06
  -3  -1   0  112.39    2.01
  -3  -1   0  111.05    2.00
  -3  -1   0  109.64    2.00
  -3  -1   0  113.08    2.06
  -3  -1   0  113.44    2.04
  -3  -1   0  112.91    2.13
  -3  -1   0  113.45    2.18
   3   1   0  113.01    2.15
   3   1   0  111.58    2.05
   3   1   0  111.83    2.00
   3   1   0  111.13    2.12
   3   1   0  110.58    2.06
   3   1   0  110.15    2.04
   3   1   0  112.07    2.00
   3   1   0  113.05    2.05
   3   1   0  112.22    2.01
  -4  -1   0    2.14    0.21
  -4  -1   0    1.72    0.34
  -4  -1   0    2.09    0.29
  -4  -1   0    2.51    0.29
  -4  -1   0    1.76    0.36
  -4  -1   0    2.03    0.23
  -4  -1   0    2.51    0.25
  -4  -1   0    2.17    0.28
  -4  -1   0    2.25    0.26
  -4  -1   0    2.01    0.41
   4   1   0    2.13    0.41
   4   1   0    2.30    0.28
   4   1   0    2.17    0.28
   4   1   0    2.18    0.28
   4   1   0    2.00    0.29
   4   1   0    2.26    0.25
   4   1   0    2.08    0.24
   4   1   0    2.25    0.29
   4   1   0    2.14    0.36
  -5  -1   0    4.00    0.37
  -5  -1   0    4.42    0.51
  -5  -1   0    5.17    0.56
  -5  -1   0    5.33    0.42
  -5  -1   0    4.86    0.46
  -5  -1   0    4.19    0.39
  -5  -1   0    4.77    0.45
  -5  -1   0    3.93    0.31
  -5  -1   0    4.73    0.43
   5   1   0    4.55    0.46
   5   1   0    3.65    0.48
   5   1   0    4.66    0.44
   5   1   0    4.64    0.43
   5   1   0    4.52    0.56
   5   1   0    4.10    0.43
   5   1   0    4.49    0.40
   5   1   0    4.62    0.33
   5   1   0    4.72    0.58
   5   1   0    4.79    0.40
  -6  -1   0   39.07    1.02
  -6  -1   0   37.98    0.97
  -6  -1   0   35.81    1.15
  -6  -1   0   36.74    1.07
  -6  -1   0   37.81    0.97
  -6  -1   0   39.59    1.26
  -6  -1   0   37.97    1.01
  -6  -1   0   37.24    0.85
  -6  -1   0   38.35    1.19
  -6  -1   0   38.31    1.06
   6   1   0   38.73    0.98
   6   1   0   38.60    1.06
   6   1   0   37.39    1.24
   6   1   0   38.54    1.03
   6   1   0   38.75    1.17
   6   1   0   38.43    0.85
   6   1   0   37.90    1.04
   6   1   0   36.86    1.06
   6   1   0   37.15    1.18
   6   1   0   38.66    0.97
  -7  -1   0   13.70    0.49
  -7  -1   0   13.87    0.67
  -7  -1   0   13.21    0.72
  -7  -1   0   12.52    0.82
  -7  -1   0   12.88    0.64
  -7  -1   0   13.68    0.68
  -7  -1   0   13.16    0.63
  -7  -1   0   14.36    0.71
  -7  -1   0   13.60    0.86
  -7  -1   0   13.35    0.92
   7   1   0   13.98    0.71
   7   1   0   12.87    0.72
   7   1   0   13.78    0.63
   7   1   0   12.65    0.68
   7   1   0   14.26    0.69
   7   1   0   12.37    0.84
   7   1   0   12.96    0.89
   7   1   0   11.85    0.84
   7   1   0   13.42    0.48
   7   1   0   13.51    0.62
  -8  -1   0    1.03    0.55
  -8  -1   0   -0.01    0.35
  -8  -1   0   -0.04    0.37
  -8  -1   0    0.46    0.35
  -8  -1   0   -0.11    0.22
  -8  -1   0    0.49    0.33
  -8  -1   0   -0.07    0.31
  -8  -1   0   -0.18    0.59
  -8  -1   0    0.07    0.33
  -8  -1   0    0.39    0.45
   8   1   0   -0.16    0.34
   8   1   0    1.16    0.49
   8   1   0    0.13    0.48
   8   1   0    0.71    0.40
   8   1   0    0.19    0.31
   8   1   0    0.40    0.33
   8   1   0   -0.02    0.19
   8   1   0    0.20    0.33
   8   1   0   -0.11    0.49
  -9  -1   0    1.90    0.50
  -9  -1   0    0.88    0.39
  -9  -1   0    2.10    0.59
  -9  -1   0    1.21    0.26
  -9  -1   0    1.46    0.41
  -9  -1   0    1.00    0.70
  -9  -1   0    0.77    0.43
  -9  -1   0    2.28    0.71
  -9  -1   0    1.82    0.51
  -9  -1   0    1.43    0.44
   9   1   0    0.90    0.44
   9   1   0    1.81    0.46
   9   1   0    1.88    0.49
   9   1   0    0.77    0.35
   9   1   0    2.12    0.63
   9   1   0    1.49    0.65
   9   1   0    0.59    0.44
   9   1   0    1.35    0.24
   9   1   0    2.11    0.62
   9   1   0    0.99    0.43
 -10  -1   0    1.11    0.44
 -10  -1   0    0.72    0.48
 -10  -1   0    1.12    0.26
 -10  -1   0    1.57    0.73
 -10  -1   0    1.35    0.50
 -10  -1   0    1.02    0.52
 -10  -1   0    1.76    0.51
 -10  -1   0    3.55    0.92
 -10  -1   0    1.11    0.49
 -10  -1   0    1.80    0.71
  10   1   0    1.35    0.45
  10   1   0    2.65    1.10
  10   1   0    0.85    0.48
  10   1   0    0.99    0.24
  10   1   0    1.05    0.65
  10   1   0    1.51    0.55
  10   1   0    0.89    0.73
  10   1   0    0.69    0.49
  10   1   0    1.20    0.49
  10   1   0    1.10    0.55
 -11  -1   0    1.53    0.58
 -11  -1   0    1.13    0.57
 -11  -1   0    0.33    0.56
 -11  -1   0    0.92    0.54
 -11  -1   0    1.01    0.61
 -11  -1   0    0.73    0.71
  11   1   0    1.18    0.54
  11   1   0    0.58    0.80
  11   1   0    0.81    0.75
  11   1   0    0.95    0.54
  11   1   0    1.48    0.57
  11   1   0    0.39    0.46
  11   1   0    0.42    0.60
 -12  -1   0    0.86    0.71
 -12  -1   0    1.82    0.67
 -12  -1   0    1.24    0.66
 -12  -1   0    1.39    0.67
 -12  -1   0    1.11    0.79
 -12  -1   0    1.03    0.60
  12   1   0    0.44    0.79
  12   1   0   -0.10    1.20
  12   1   0    1.53    0.60
  12   1   0    0.45    0.64
  12   1   0    1.52    0.85
  12   1   0    1.96    0.68
  12   1   0    1.34    0.63
 -13  -1   0    4.70    0.83
 -13  -1   0    5.48    0.89
 -13  -1   0    5.32    1.24
 -13  -1   0    5.81    0.88
 -13  -1   0    3.62    1.06
 -13  -1   0    6.24    1.01
 -13  -1   0    6.50    0.83
  13   1   0    4.81    0.88
  13   1   0    6.30    0.96
  13   1   0    5.27    1.05
  13   1   0    6.18    0.97
  13   1   0    5.51    0.91
  13   1   0    6.63    0.81
  13   1   0    5.00    1.19
 -14  -1   0    0.71    1.18
 -14  -1   0    0.99    0.79
 -14  -1   0    0.15    0.82
 -14  -1   0    0.01    1.00
 -14  -1   0    0.84    0.87
  14   1   0    2.11    0.92
  14   1   0    1.29    0.78
  14   1   0   -0.02    1.00
 -15  -1   0    1.17    0.89
 -15  -1   0   -1.14    1.12
 -15  -1   0   -0.31    1.42
 -15  -1   0    0.71    1.02
  15   1   0    0.39    0.98
  15   1   0    1.00    1.14
  15   1   0   -0.32    0.96
 -16  -1   0    1.68    1.05
 -16  -1   0   -0.07    1.61
 -16  -1   0    1.45    1.42
  16   1   0    0.39    1.17
  16   1   0    0.36    1.29
  16  -2   0    3.76    1.67
  16  -2   0    0.13    1.47
  16  -2   0   -1.59    1.30
 -16   2   0   -0.91    1.49
 -16   2   0    1.18    1.42
 -16   2   0   -0.55    1.36
  15  -2   0    1.27    1.20
  15  -2   0   -0.78    1.17
  15  -2   0    1.82    1.44
  15  -2   0    0.47    1.11
 -15   2   0   -0.96    1.13
 -15   2   0    0.25    1.36
 -15   2   0    0.89    1.16
  14  -2   0    0.60    0.97
  14  -2   0    2.05    1.11
  14  -2   0   -0.10    1.28
  14  -2   0    2.47    1.08
 -14   2   0   -0.21    0.96
 -14   2   0   -0.92    1.00
 -14   2   0    0.87    1.10
 -14   2   0    1.17    1.12
  13  -2   0    0.91    0.97
  13  -2   0    1.60    0.94
  13  -2   0    2.19    1.13
  13  -2   0    1.89    0.91
 -13   2   0   -0.28    0.96
 -13   2   0    1.70    0.88
 -13   2   0    1.06    0.92
 -13   2   0    1.20    0.95
  12  -2   0    2.99    0.79
  12  -2   0    3.82    1.06
  12  -2   0    3.32    1.07
  12  -2   0    4.35    0.97
  12  -2   0    2.05    0.80
  12  -2   0    3.14    0.84
 -12   2   0    3.09    0.91
 -12   2   0    3.04    0.75
 -12   2   0    3.40    0.88
 -12   2   0    3.92    0.91
 -12   2   0    4.21    0.96
 -12   2   0    3.12    0.82
  11  -2   0   -0.05    0.72
  11  -2   0    0.86    0.73
  11  -2   0    1.20    0.69
  11  -2   0    1.45    0.63
  11  -2   0   -0.11    0.68
  11  -2   0    0.71    0.81
 -11   2   0    0.14    0.67
 -11   2   0    0.16    0.67
 -11   2   0   -0.21    0.65
 -11   2   0   -0.56    0.78
 -11   2   0    0.29    0.73
 -11   2   0   -0.62    0.63
  10  -2   0   18.31    1.11
  10  -2   0   17.84    1.22
  10  -2   0   17.39    1.29
  10  -2   0   16.47    1.13
  10  -2   0   17.81    1.36
  10  -2   0   16.58    1.18
 -10   2   0   18.71    1.23
 -10   2   0   18.36    1.13
 -10   2   0   15.52    1.16
 -10   2   0   17.42    1.26
 -10   2   0   17.76    1.10
 -10   2   0   15.36    1.25
 -10   2   0   18.38    1.34
   9  -2   0    0.83    0.67
   9  -2   0    0.30    0.57
   9  -2   0   -0.16    0.47
   9  -2   0    0.34    0.61
   9  -2   0   -0.18    0.50
   9  -2   0   -0.29    0.51
   9  -2   0   -0.53    0.53
   9  -2   0   -0.61    0.43
  -9   2   0    0.09    0.72
  -9   2   0   -0.20    0.47
  -9   2   0    0.53    0.51
  -9   2   0   -0.29    0.52
  -9   2   0    0.17    0.49
  -9   2   0    0.77    0.54
  -9   2   0    0.35    0.67
  -9   2   0   -0.27    0.52
  -9   2   0   -0.80    0.51
   8  -2   0    3.92    0.57
   8  -2   0    5.88    0.63
   8  -2   0    5.56    0.70
   8  -2   0    5.92    0.80
   8  -2   0    5.15    0.65
   8  -2   0    5.71    0.77
   8  -2   0    4.55    0.74
   8  -2   0    5.10    0.63
   8  -2   0    5.57    0.65
  -8   2   0    5.92    0.68
  -8   2   0    6.72    0.82
  -8   2   0    5.87    0.73
  -8   2   0    4.19    0.60
  -8   2   0    5.23    0.69
  -8   2   0    4.48    0.61
  -8   2   0    5.20    0.63
  -8   2   0    4.87    0.79
  -8   2   0    4.89    0.72
   7  -2   0    0.43    0.51
   7  -2   0    0.40    0.46
   7  -2   0    0.26    0.45
   7  -2   0    0.89    0.41
   7  -2   0    0.83    0.43
   7  -2   0    0.65    0.38
   7  -2   0    1.05    0.47
   7  -2   0    0.72    0.37
  -7   2   0    1.14    0.43
  -7   2   0    1.34    0.49
  -7   2   0    1.46    0.44
  -7   2   0    0.54    0.41
  -7   2   0    1.47    0.45
  -7   2   0    0.92    0.44
  -7   2   0    0.62    0.53
  -7   2   0    0.27    0.42
  -7   2   0    0.00    0.33
   6  -2   0    5.45    0.63
   6  -2   0    6.47    0.63
   6  -2   0    5.16    0.61
   6  -2   0    5.25    0.67
   6  -2   0    5.40    0.67
   6  -2   0    4.85    0.56
   6  -2   0    5.92    0.64
   6  -2   0    5.90    0.65
  -6   2   0    4.93    0.62
  -6   2   0    5.85    0.69
  -6   2   0    4.81    0.64
  -6   2   0    6.02    0.69
  -6   2   0    6.36    0.62
  -6   2   0    6.04    0.66
  -6   2   0    4.39    0.54
  -6   2   0    5.69    0.64
  -6   2   0    5.72    0.65
   5  -2   0    3.23    0.43
   5  -2   0    2.19    0.37
   5  -2   0    2.96    0.45
   5  -2   0    3.36    0.53
   5  -2   0    2.58    0.50
   5  -2   0    2.37    0.44
   5  -2   0    2.64    0.45
   5  -2   0    3.19    0.49
  -5   2   0    2.92    0.41
  -5   2   0    3.10    0.43
  -5   2   0    3.03    0.47
  -5   2   0    2.80    0.41
  -5   2   0    2.39    0.47
  -5   2   0    2.94    0.42
  -5   2   0    2.49    0.42
  -5   2   0    1.99    0.42
  -5   2   0    2.18    0.38
   4  -2   0    0.53    0.31
   4  -2   0    0.31    0.34
   4  -2   0    0.55    0.34
   4  -2   0    0.50    0.31
   4  -2   0    0.61    0.37
   4  -2   0    0.23    0.31
   4  -2   0   -0.11    0.22
   4  -2   0    0.44    0.32
   4  -2   0    0.57    0.33
  -4   2   0    0.42    0.32
  -4   2   0    0.68    0.35
  -4   2   0    0.38    0.30
  -4   2   0    0.86    0.31
  -4   2   0    0.28    0.33
  -4   2   0    0.48    0.31
  -4   2   0   -0.03    0.27
  -4   2   0    0.12    0.28
  -4   2   0    0.11    0.35
   3  -2   0    4.09    0.46
   3  -2   0    4.18    0.48
   3  -2   0    4.16    0.47
   3  -2   0    3.30    0.36
   3  -2   0    4.37    0.48
   3  -2   0    4.14    0.43
   3  -2   0    4.29    0.48
   3  -2   0    3.97    0.21
   3  -2   0    3.78    0.45
  -3   2   0    4.11    0.50
  -3   2   0    3.66    0.46
  -3   2   0    4.17    0.47
  -3   2   0    4.18    0.49
  -3   2   0    3.69    0.47
  -3   2   0    4.44    0.48
  -3   2   0    3.83    0.41
  -3   2   0    3.63    0.47
  -3   2   0    4.01    0.47
  -3   2   0    4.31    0.21
   2  -2   0   30.14    0.77
   2  -2   0   27.98    0.80
   2  -2   0   29.04    0.78
   2  -2   0   29.87    0.61
   2  -2   0   28.96    0.80
   2  -2   0   29.65    0.81
   2  -2   0   27.58    0.80
   2  -2   0   29.91    0.79
   2  -2   0   29.67    0.79
  -2   2   0   29.22    0.82
  -2   2   0   29.48    0.82
  -2   2   0   29.66    0.80
  -2   2   0   29.21    0.75
  -2   2   0   29.32    0.80
  -2   2   0   30.71    0.80
  -2   2   0   28.72    0.80
  -2   2   0   28.79    0.81
  -2   2   0   29.11    0.61
   1  -2   0    4.01    0.36
   1  -2   0    4.27    0.36
   1  -2   0    4.74    0.37
   1  -2   0    5.01    0.35
   1  -2   0    2.86    0.35
   1  -2   0    3.54    0.35
   1  -2   0    3.77    0.26
  -1   2   0    4.47    0.36
  -1   2   0    3.97    0.36
  -1   2   0    3.89    0.35
  -1   2   0    3.98    0.35
  -1   2   0    3.64    0.36
  -1   2   0    3.47    0.27
  -1   2   0    4.67    0.43
   0  -2   0    0.62    0.16
   0  -2   0    0.02    0.13
   0  -2   0    0.03    0.14
   0  -2   0    0.81    0.28
   0   2   0    0.09    0.06
   0   2   0    0.03    0.12
   0   2   0    0.00    0.12
   0   2   0   -0.12    0.13
   0   2   0    0.89    0.18
   0   2   0    0.65    0.17
  -1  -2   0   22.54    0.53
  -2  -2   0  116.51    2.09
  -2  -2   0  117.13    2.16
  -2  -2   0  114.03    2.06
  -2  -2   0  114.37    2.05
  -2  -2   0  113.75    2.04
  -2  -2   0  117.94    2.16
  -2  -2   0  108.11    2.03
  -2  -2   0  114.23    2.08
  -2  -2   0  115.73    2.11
  -2  -2   0  116.92    2.03
   2   2   0  115.07    2.06
   2   2   0  114.03    2.11
   2   2   0  114.81    2.16
   2   2   0  112.17    2.00
   2   2   0  115.14    2.05
   2   2   0  116.43    2.06
   2   2   0  116.34    2.05
   2   2   0  115.06    2.14
   2   2   0  114.27    2.06
   2   2   0  115.26    2.00
  -3  -2   0   26.47    0.70
  -3  -2   0   27.39    0.59
  -3  -2   0   27.75    0.65
  -3  -2   0   27.36    0.80
  -3  -2   0   27.17    0.59
  -3  -2   0   27.17    0.64
  -3  -2   0   27.47    0.83
  -3  -2   0   27.61    0.67
  -3  -2   0   26.71    0.81
  -3  -2   0   27.60    0.67
  -3  -2   0   27.35    0.59
  -3  -2   0   27.23    0.71
   3   2   0   27.80    0.81
   3   2   0   28.76    0.67
   3   2   0   27.98    0.66
   3   2   0   26.81    0.67
   3   2   0   27.59    0.83
   3   2   0   27.05    0.72
   3   2   0   26.83    0.70
   3   2   0   28.57    0.66
  -4  -2   0    1.45    0.34
  -4  -2   0    1.30    0.23
  -4  -2   0    1.56    0.25
  -4  -2   0    1.36    0.26
  -4  -2   0    1.56    0.30
  -4  -2   0    1.41    0.21
  -4  -2   0    1.19    0.35
  -4  -2   0    1.44    0.26
  -4  -2   0    2.16    0.41
  -4  -2   0    1.41    0.21
  -4  -2   0    1.41    0.24
   4   2   0    1.29    0.30
   4   2   0    1.06    0.33
   4   2   0    1.41    0.24
   4   2   0    1.16    0.26
   4   2   0    1.28    0.19
   4   2   0    1.33    0.24
   4   2   0    1.46    0.26
  -5  -2   0   20.18    0.67
  -5  -2   0   20.23    0.64
  -5  -2   0   18.81    0.96
  -5  -2   0   21.38    0.88
  -5  -2   0   21.52    0.59
  -5  -2   0   19.96    0.87
  -5  -2   0   21.69    0.65
  -5  -2   0   20.48    0.63
  -5  -2   0   20.79    0.78
  -5  -2   0   19.65    0.69
  -5  -2   0   20.10    0.59
   5   2   0   20.63    0.58
   5   2   0   20.36    0.92
   5   2   0   20.79    0.66
   5   2   0   19.50    0.83
   5   2   0   19.59    0.68
   5   2   0   20.16    0.66
   5   2   0   20.27    0.65
   5   2   0   20.78    0.63
   5   2   0   21.47    0.59
  -6  -2   0   18.10    0.60
  -6  -2   0   18.18    0.62
  -6  -2   0   18.01    0.93
  -6  -2   0   18.65    0.86
  -6  -2   0   18.49    0.70
  -6  -2   0   18.40    0.66
  -6  -2   0   18.21    0.83
  -6  -2   0   17.53    0.72
  -6  -2   0   17.71    0.92
  -6  -2   0   17.96    0.64
  -6  -2   0   18.57    0.63
   6   2   0   18.03    0.73
   6   2   0   21.53    0.85
   6   2   0   19.07    0.68
   6   2   0   19.08    0.70
   6   2   0   18.13    0.86
   6   2   0   18.94    0.61
   6   2   0   19.37    0.94
   6   2   0   18.53    0.61
   6   2   0   18.36    0.63
   6   2   0   18.83    0.69
  -7  -2   0    5.02    0.51
  -7  -2   0    5.63    0.50
  -7  -2   0    5.38    0.49
  -7  -2   0    4.74    0.46
  -7  -2   0    5.34    0.47
  -7  -2   0    5.87    0.68
  -7  -2   0    4.99    0.63
  -7  -2   0    4.93    0.58
  -7  -2   0    4.76    0.54
  -7  -2   0    5.41    0.46
  -7  -2   0    6.05    0.64
   7   2   0    4.96    0.51
   7   2   0    5.00    0.45
   7   2   0    4.92    0.58
   7   2   0    5.29    0.63
   7   2   0    4.44    0.54
   7   2   0    5.04    0.46
   7   2   0    4.76    0.49
   7   2   0    5.05    0.45
   7   2   0    5.35    0.53
   7   2   0    4.69    0.56
  -8  -2   0   13.87    0.79
  -8  -2   0   14.70    0.61
  -8  -2   0   15.80    0.73
  -8  -2   0   15.01    0.92
  -8  -2   0   13.61    0.66
  -8  -2   0   14.81    0.77
  -8  -2   0   14.26    1.05
  -8  -2   0   14.79    0.98
  -8  -2   0   14.58    0.68
  -8  -2   0   14.79    1.07
  -8  -2   0   13.39    0.67
   8   2   0   14.62    0.66
   8   2   0   12.93    0.79
   8   2   0   14.57    0.66
   8   2   0   15.11    1.03
   8   2   0   12.78    0.95
   8   2   0   15.74    0.96
   8   2   0   14.91    0.75
   8   2   0   14.66    0.72
   8   2   0   15.06    0.60
   8   2   0   14.37    0.72
  -9  -2   0    4.94    0.55
  -9  -2   0    4.71    0.41
  -9  -2   0    6.27    0.82
  -9  -2   0    4.99    0.82
  -9  -2   0    4.49    0.62
  -9  -2   0    3.99    0.75
  -9  -2   0    5.20    0.59
  -9  -2   0    7.05    0.71
  -9  -2   0    5.21    0.61
  -9  -2   0    5.82    0.72
  -9  -2   0    4.89    0.59
   9   2   0    5.90    0.76
   9   2   0    4.73    0.57
   9   2   0    4.92    0.57
   9   2   0    5.53    0.50
   9   2   0    4.73    0.61
   9   2   0    6.23    0.84
   9   2   0    4.95    0.56
   9   2   0    4.52    0.71
   9   2   0    5.60    0.56
 -10  -2   0    1.05    0.78
 -10  -2   0    0.95    0.46
 -10  -2   0    0.81    0.48
 -10  -2   0    0.56    0.42
 -10  -2   0    0.03    0.76
 -10  -2   0    0.28    0.38
 -10  -2   0    1.30    0.53
 -10  -2   0   -0.14    0.61
 -10  -2   0    0.83    0.33
 -10  -2   0   -0.44    0.45
 -10  -2   0    0.19    0.64
  10   2   0    0.37    0.47
  10   2   0    0.72    0.43
  10   2   0    0.33    0.31
  10   2   0    0.74    0.61
  10   2   0    0.72    0.43
  10   2   0    0.69    0.46
  10   2   0    0.96    0.70
  10   2   0    0.21    0.37
  10   2   0   -0.62    0.63
  10   2   0    0.83    0.46
 -11  -2   0    1.57    0.53
 -11  -2   0    0.87    0.36
 -11  -2   0    1.16    0.48
 -11  -2   0    1.41    0.83
 -11  -2   0    1.17    0.60
 -11  -2   0    1.10    0.52
 -11  -2   0    0.93    0.71
 -11  -2   0    1.67    0.55
  11   2   0    0.92    0.55
  11   2   0    0.18    0.43
  11   2   0    1.78    0.54
  11   2   0    1.33    0.51
  11   2   0    0.53    0.51
  11   2   0    1.27    0.77
  11   2   0    1.78    0.34
 -12  -2   0    1.38    1.78
 -12  -2   0    0.54    0.53
 -12  -2   0    0.21    0.59
 -12  -2   0   -0.62    0.57
 -12  -2   0    0.50    0.78
 -12  -2   0    0.12    0.57
 -12  -2   0    0.01    0.31
 -12  -2   0   -0.35    0.73
 -12  -2   0    0.72    0.35
  12   2   0   -1.05    0.60
  12   2   0    1.02    0.57
  12   2   0   -0.14    0.57
  12   2   0    0.38    0.60
  12   2   0    0.60    0.76
 -13  -2   0    0.60    0.62
 -13  -2   0   -0.68    0.95
 -13  -2   0   -0.17    0.66
 -13  -2   0   -0.37    0.72
 -13  -2   0    0.04    1.16
 -13  -2   0    0.15    0.89
 -13  -2   0    0.30    0.72
  13   2   0    0.27    0.74
  13   2   0    0.97    0.79
  13   2   0    0.36    0.70
  13   2   0    0.98    0.71
  13   2   0    0.25    0.60
  13   2   0    0.36    0.86
 -14  -2   0   -0.32    0.72
 -14  -2   0    0.37    0.82
 -14  -2   0   -1.99    1.01
 -14  -2   0   -0.94    1.00
 -14  -2   0    0.50    0.78
 -14  -2   0   -0.25    0.80
  14   2   0    0.43    0.70
  14   2   0    0.25    0.82
  14   2   0   -1.89    0.94
 -15  -2   0    1.42    0.85
 -15  -2   0    1.55    1.31
 -15  -2   0   -0.87    1.10
 -15  -2   0    2.88    1.00
  15   2   0   -0.74    0.90
  15   2   0    0.88    1.09
 -16  -2   0   -0.32    1.56
 -16  -2   0    1.88    1.32
 -16  -2   0    0.49    1.05
  16   2   0   -1.31    1.04
  16   2   0   -0.69    1.24
  15  -3   0   -0.53    1.26
  15  -3   0    1.91    1.32
  15  -3   0    1.03    1.27
  15  -3   0   -2.57    1.40
 -15   3   0    2.26    1.30
 -15   3   0   -0.40    1.26
 -15   3   0    1.08    1.38
  14  -3   0    0.24    1.09
  14  -3   0   -1.29    1.03
  14  -3   0   -2.03    1.22
  14  -3   0    1.80    1.09
 -14   3   0    1.20    1.16
 -14   3   0    0.72    1.10
 -14   3   0    1.72    1.17
 -14   3   0   -0.73    1.06
  13  -3   0   -0.22    1.09
  13  -3   0    1.34    0.94
  13  -3   0    1.19    1.01
  13  -3   0   -1.48    0.87
 -13   3   0    0.71    0.95
 -13   3   0   -0.19    1.04
 -13   3   0    0.63    0.98
 -13   3   0   -0.20    1.01
  12  -3   0   -0.66    0.83
  12  -3   0    1.13    1.00
  12  -3   0    3.28    1.55
  12  -3   0    1.56    0.80
  12  -3   0    1.28    0.86
  12  -3   0    1.82    0.88
 -12   3   0    0.07    0.89
 -12   3   0   -1.57    0.82
 -12   3   0   -0.15    0.82
 -12   3   0    0.93    0.91
 -12   3   0   -0.24    0.87
 -12   3   0    0.92    0.82
  11  -3   0    0.60    0.69
  11  -3   0    2.14    0.80
  11  -3   0    1.53    0.80
  11  -3   0    1.45    0.78
  11  -3   0   -0.81    0.99
  11  -3   0    0.74    0.80
  11  -3   0    3.29    0.82
 -11   3   0    1.35    0.71
 -11   3   0    1.39    0.75
 -11   3   0    2.65    0.82
 -11   3   0    1.49    0.80
 -11   3   0    2.60    0.98
 -11   3   0    1.93    0.82
  10  -3   0   18.82    1.25
  10  -3   0   22.25    1.29
  10  -3   0   21.19    1.31
  10  -3   0   19.42    1.33
  10  -3   0   19.30    1.38
  10  -3   0   20.89    1.33
  10  -3   0   20.07    1.48
 -10   3   0   20.11    1.34
 -10   3   0   19.72    1.43
 -10   3   0   20.22    1.28
 -10   3   0   21.66    1.27
 -10   3   0   21.29    1.45
 -10   3   0   19.95    1.38
 -10   3   0   19.89    1.36
   9  -3   0    1.72    0.57
   9  -3   0    1.32    0.70
   9  -3   0    1.25    0.64
   9  -3   0    1.31    0.63
   9  -3   0    1.25    0.63
   9  -3   0    0.94    0.53
   9  -3   0    2.66    0.65
  -9   3   0    1.52    0.61
  -9   3   0    1.02    0.64
  -9   3   0    1.61    0.64
  -9   3   0    1.60    0.85
  -9   3   0    0.94    0.74
  -9   3   0    0.56    0.57
  -9   3   0    1.36    0.63
  -9   3   0    0.87    0.59
  -9   3   0    1.54    0.57
   8  -3   0    0.96    0.58
   8  -3   0    0.93    0.52
   8  -3   0    0.66    0.55
   8  -3   0    0.44    0.44
   8  -3   0    0.92    0.51
   8  -3   0    0.79    0.62
   8  -3   0    0.29    0.44
   8  -3   0    0.54    0.60
  -8   3   0    0.32    0.49
  -8   3   0    0.73    0.57
  -8   3   0    0.69    0.55
  -8   3   0    0.80    0.44
  -8   3   0    0.43    0.53
  -8   3   0    0.20    0.68
  -8   3   0    0.11    0.45
  -8   3   0    0.30    0.58
  -8   3   0    0.67    0.57
   7  -3   0    6.04    0.76
   7  -3   0    4.89    0.56
   7  -3   0    5.73    0.75
   7  -3   0    4.70    0.71
   7  -3   0    6.36    0.82
   7  -3   0    5.25    0.66
   7  -3   0    4.69    0.69
   7  -3   0    6.16    0.74
  -7   3   0    5.05    0.58
  -7   3   0    5.03    0.62
  -7   3   0    4.84    0.63
  -7   3   0    7.46    0.79
  -7   3   0    4.93    0.64
  -7   3   0    5.77    0.64
  -7   3   0    5.16    0.61
  -7   3   0    4.77    0.63
  -7   3   0    3.79    0.56
   6  -3   0   35.01    1.20
   6  -3   0   36.98    1.23
   6  -3   0   36.29    1.18
   6  -3   0   34.45    1.27
   6  -3   0   35.45    1.17
   6  -3   0   34.55    1.21
   6  -3   0   36.85    1.19
   6  -3   0   36.17    1.24
   6  -3   0   34.21    1.28
  -6   3   0   35.49    1.21
  -6   3   0   35.84    1.20
  -6   3   0   34.12    1.20
  -6   3   0   34.92    1.21
  -6   3   0   37.20    1.28
  -6   3   0   35.05    1.21
  -6   3   0   36.51    1.22
  -6   3   0   32.92    1.19
  -6   3   0   36.04    1.31
   5  -3   0    3.17    0.44
   5  -3   0    4.34    0.49
   5  -3   0    4.92    0.62
   5  -3   0    4.48    0.57
   5  -3   0    4.58    0.51
   5  -3   0    3.47    0.53
   5  -3   0    3.59    0.55
   5  -3   0    4.65    0.53
   5  -3   0    3.57    0.51
  -5   3   0    4.18    0.49
  -5   3   0    3.61    0.48
  -5   3   0    4.70    0.53
  -5   3   0    3.16    0.44
  -5   3   0    4.47    0.54
  -5   3   0    4.01    0.53
  -5   3   0    4.38    0.53
  -5   3   0    3.07    0.50
  -5   3   0    3.86    0.49
   4  -3   0    2.13    0.45
   4  -3   0    1.89    0.39
   4  -3   0    2.54    0.45
   4  -3   0    3.15    0.44
   4  -3   0    1.88    0.39
   4  -3   0    1.67    0.40
   4  -3   0    2.38    0.39
   4  -3   0    1.99    0.23
   4  -3   0    2.14    0.39
   4  -3   0    2.69    0.46
  -4   3   0    2.59    0.40
  -4   3   0    2.77    0.43
  -4   3   0    2.10    0.45
  -4   3   0    2.50    0.41
  -4   3   0    2.58    0.43
  -4   3   0    2.35    0.43
  -4   3   0    2.15    0.49
  -4   3   0    2.56    0.44
  -4   3   0    2.64    0.24
   3  -3   0   14.67    0.70
   3  -3   0   15.08    0.69
   3  -3   0   14.07    0.72
   3  -3   0   14.61    0.71
   3  -3   0   14.32    0.68
   3  -3   0   14.15    0.73
   3  -3   0   14.50    0.44
   3  -3   0   14.64    0.64
  -3   3   0   13.87    0.68
  -3   3   0   15.52    0.69
  -3   3   0   14.70    0.44
  -3   3   0   13.60    0.82
  -3   3   0   13.05    0.73
  -3   3   0   14.49    0.68
  -3   3   0   14.41    0.70
  -3   3   0   14.25    0.66
  -3   3   0   14.38    0.71
  -3   3   0   14.63    0.71
   2  -3   0    0.38    0.31
   2  -3   0    0.42    0.35
   2  -3   0   -0.30    0.28
   2  -3   0    0.11    0.30
   2  -3   0   -0.05    0.28
   2  -3   0    0.38    0.19
   2  -3   0    0.36    0.27
   2  -3   0    0.22    0.25
   2  -3   0   -0.11    0.26
   2  -3   0    0.40    0.51
  -2   3   0    0.35    0.31
  -2   3   0   -0.03    0.19
  -2   3   0    0.11    0.28
  -2   3   0    0.46    0.30
  -2   3   0    0.36    0.30
  -2   3   0   -0.33    0.27
  -2   3   0   -0.07    0.32
  -2   3   0   -0.05    0.22
  -2   3   0   -0.25    0.43
   1  -3   0    6.85    0.48
   1  -3   0    7.55    0.39
   1  -3   0    8.20    0.49
   1  -3   0    9.72    0.68
   1  -3   0    8.01    0.47
   1  -3   0    5.74    0.51
   1  -3   0    6.69    0.48
   1  -3   0    7.81    0.37
   1  -3   0    6.71    0.48
  -1   3   0    6.72    0.48
  -1   3   0    9.08    0.64
  -1   3   0    6.69    0.47
  -1   3   0    7.17    0.35
  -1   3   0    6.84    0.48
  -1   3   0    7.31    0.49
  -1   3   0    7.04    0.39
  -1   3   0    7.62    0.51
  -1   3   0    6.78    0.48
  -1   3   0    7.84    0.46
   0  -3   0    0.49    0.23
   0  -3   0    0.49    0.23
   0  -3   0    0.57    0.24
   0  -3   0    0.90    0.27
   0  -3   0    0.41    0.23
   0  -3   0    0.49    0.24
   0  -3   0    0.40    0.22
   0  -3   0    0.73    0.25
   0  -3   0    1.23    0.42
   0   3   0    0.79    0.25
   0   3   0    0.81    0.35
   0   3   0    0.38    0.20
   0   3   0    0.54    0.23
   0   3   0    0.39    0.21
   0   3   0    0.66    0.23
   0   3   0    0.51    0.22
   0   3   0    0.35    0.23
   0   3   0    0.79    0.12
   0   3   0    0.60    0.12
   0   3   0    0.40    0.22
  -1  -3   0  518.41    8.91
  -1  -3   0  520.90    8.85
  -1  -3   0  518.43    8.89
  -1  -3   0  527.98    8.91
  -1  -3   0  526.46    8.91
  -1  -3   0  526.82    8.85
  -1  -3   0  525.91    8.90
  -1  -3   0  527.75    8.89
  -1  -3   0  518.10    8.90
   1   3   0  521.87    8.85
   1   3   0  511.43    8.85
   1   3   0  512.09    8.89
   1   3   0  529.07    8.91
   1   3   0  524.93    8.91
   1   3   0  523.92    8.91
   1   3   0  505.13    8.89
  -2  -3   0    2.77    0.31
  -2  -3   0    2.68    0.32
  -2  -3   0    2.52    0.22
  -2  -3   0    2.67    0.32
  -2  -3   0    2.72    0.31
  -2  -3   0    2.56    0.22
  -2  -3   0    2.81    0.31
  -2  -3   0    2.97    0.31
  -2  -3   0    3.40    0.41
  -2  -3   0    2.73    0.24
   2   3   0    3.15    0.32
   2   3   0    2.24    0.27
   2   3   0    3.31    0.40
   2   3   0    2.85    0.23
   2   3   0    2.49    0.27
   2   3   0    3.06    0.32
   2   3   0    3.07    0.32
   2   3   0    2.52    0.27
   2   3   0    2.81    0.31
   2   3   0    2.48    0.32
  -3  -3   0  266.75    4.51
  -3  -3   0  262.37    4.58
  -3  -3   0  244.75    4.69
  -3  -3   0  268.82    4.67
  -3  -3   0  261.37    4.60
  -3  -3   0  262.96    4.56
  -3  -3   0  264.14    4.51
  -3  -3   0  272.14    4.58
  -3  -3   0  272.99    4.73
  -3  -3   0  253.85    4.85
   3   3   0  250.45    4.89
   3   3   0  264.12    4.58
   3   3   0  269.68    4.67
   3   3   0  264.03    4.51
   3   3   0  253.88    4.69
   3   3   0  259.80    4.58
   3   3   0  260.24    4.51
   3   3   0  268.81    4.60
   3   3   0  267.77    4.59
   3   3   0  269.16    4.74
  -4  -3   0  103.93    1.96
  -4  -3   0  108.29    1.98
  -4  -3   0  108.08    2.19
  -4  -3   0  105.32    1.90
  -4  -3   0  105.93    1.90
  -4  -3   0  105.39    2.06
  -4  -3   0  102.65    2.20
  -4  -3   0  107.05    2.07
  -4  -3   0  105.67    2.02
  -4  -3   0  102.82    1.90
  -4  -3   0  103.73    2.01
  -4  -3   0  106.35    1.90
   4   3   0  106.74    2.07
   4   3   0  104.85    1.99
   4   3   0  105.71    2.06
   4   3   0  107.07    2.20
   4   3   0  102.15    1.98
   4   3   0  102.76    2.01
   4   3   0  101.71    2.17
  -5  -3   0   83.59    1.64
  -5  -3   0   81.43    1.89
  -5  -3   0   87.35    1.91
  -5  -3   0   82.32    1.57
  -5  -3   0   84.91    1.73
  -5  -3   0   82.41    1.69
  -5  -3   0   84.36    1.65
  -5  -3   0   84.73    1.57
  -5  -3   0   81.16    1.92
  -5  -3   0   82.42    1.57
  -5  -3   0   80.75    1.70
  -5  -3   0   83.20    1.57
  -5  -3   0   83.01    1.79
   5   3   0   79.75    1.70
   5   3   0   84.01    1.70
   5   3   0   85.39    1.74
   5   3   0   80.04    1.93
   5   3   0   83.33    1.67
   5   3   0   83.96    1.67
   5   3   0   82.41    1.88
  -6  -3   0   17.67    0.56
  -6  -3   0   18.62    0.92
  -6  -3   0   19.11    0.64
  -6  -3   0   19.10    0.89
  -6  -3   0   18.23    0.80
  -6  -3   0   17.93    0.63
  -6  -3   0   17.89    0.57
  -6  -3   0   17.77    0.69
  -6  -3   0   18.03    0.66
  -6  -3   0   17.35    0.68
  -6  -3   0   16.23    0.91
  -6  -3   0   17.82    0.56
   6   3   0   17.59    0.66
   6   3   0   16.52    0.86
   6   3   0   19.31    0.83
   6   3   0   19.51    0.69
   6   3   0   17.36    0.71
   6   3   0   19.03    0.66
   6   3   0   17.34    0.69
   6   3   0   18.68    0.57
  -7  -3   0   11.52    0.57
  -7  -3   0   12.67    0.94
  -7  -3   0   11.24    0.83
  -7  -3   0   12.19    0.78
  -7  -3   0   11.29    0.53
  -7  -3   0   11.27    0.65
  -7  -3   0   12.23    0.58
  -7  -3   0   11.27    0.61
  -7  -3   0   11.57    0.86
  -7  -3   0   11.37    0.53
  -7  -3   0   11.48    0.52
  -7  -3   0   11.94    0.62
   7   3   0   11.35    0.61
   7   3   0   10.96    0.76
   7   3   0   11.38    0.65
   7   3   0   11.33    0.50
   7   3   0   12.10    0.82
   7   3   0   11.52    0.60
  -8  -3   0    3.42    0.63
  -8  -3   0    2.84    0.44
  -8  -3   0    2.40    0.41
  -8  -3   0    3.21    0.68
  -8  -3   0    1.97    0.34
  -8  -3   0    2.35    0.38
  -8  -3   0    2.01    0.35
  -8  -3   0    2.91    0.52
  -8  -3   0    2.76    0.64
  -8  -3   0    2.71    0.44
   8   3   0    2.62    0.46
   8   3   0    2.25    0.55
   8   3   0    3.06    0.41
   8   3   0    2.99    0.34
   8   3   0    2.15    0.52
   8   3   0    2.23    0.40
   8   3   0    2.59    0.39
  -9  -3   0    1.90    0.41
  -9  -3   0    1.60    0.74
  -9  -3   0    1.84    0.48
  -9  -3   0    2.05    0.50
  -9  -3   0    1.49    0.69
  -9  -3   0    1.89    0.39
  -9  -3   0    3.08    0.62
  -9  -3   0    1.68    0.39
  -9  -3   0    1.46    0.63
  -9  -3   0    1.95    0.45
   9   3   0    2.09    0.43
   9   3   0    1.44    0.56
   9   3   0    2.68    0.49
   9   3   0    2.41    0.36
   9   3   0    1.83    0.37
   9   3   0    2.41    0.41
   9   3   0    1.85    0.46
   9   3   0    2.03    0.62
   9   3   0    1.69    0.45
 -10  -3   0   -0.71    0.70
 -10  -3   0    0.09    0.61
 -10  -3   0    0.66    0.44
 -10  -3   0   -1.12    0.72
 -10  -3   0   -0.24    0.37
 -10  -3   0    0.35    0.44
 -10  -3   0    0.30    0.39
 -10  -3   0    0.25    0.40
 -10  -3   0    0.58    0.64
 -10  -3   0    0.67    0.46
  10   3   0    0.11    0.42
  10   3   0    0.26    0.49
  10   3   0    0.82    0.39
  10   3   0    0.54    0.41
  10   3   0    0.48    0.36
  10   3   0   -0.13    0.60
  10   3   0   -0.46    0.43
  10   3   0    1.00    0.72
 -11  -3   0   -0.79    0.67
 -11  -3   0    0.15    0.52
 -11  -3   0   -0.08    0.43
 -11  -3   0    0.16    0.44
 -11  -3   0   -0.42    0.59
 -11  -3   0    0.64    0.42
 -11  -3   0    0.03    0.70
  11   3   0   -0.17    0.68
  11   3   0   -0.27    0.37
  11   3   0   -0.06    0.55
  11   3   0   -0.27    0.39
  11   3   0    1.25    0.52
  11   3   0    0.19    0.53
 -12  -3   0    2.01    0.56
 -12  -3   0    1.19    0.58
 -12  -3   0    1.48    0.66
 -12  -3   0    1.61    0.62
 -12  -3   0    1.40    1.03
 -12  -3   0    1.36    0.53
 -12  -3   0    1.41    0.65
 -12  -3   0    1.32    0.80
  12   3   0    1.95    0.63
  12   3   0    1.97    0.49
  12   3   0    2.48    0.85
  12   3   0    1.63    0.45
 -13  -3   0    5.33    1.06
 -13  -3   0    3.26    0.83
 -13  -3   0    3.58    0.74
 -13  -3   0    3.64    0.64
 -13  -3   0    2.59    0.78
 -13  -3   0    4.71    0.72
 -13  -3   0    3.16    0.72
 -13  -3   0    4.19    0.79
 -13  -3   0    4.83    1.17
  13   3   0    3.14    0.79
  13   3   0    2.27    0.95
  13   3   0    4.92    0.63
 -14  -3   0    0.36    0.74
 -14  -3   0    0.36    0.75
 -14  -3   0   -0.69    0.63
 -14  -3   0    0.13    0.53
 -14  -3   0    0.43    1.00
 -14  -3   0   -0.67    1.08
 -14  -3   0   -1.02    0.77
  14   3   0   -0.65    0.77
  14   3   0    0.83    0.90
  14   3   0   -1.12    0.90
  14   3   0   -0.18    0.62
 -15  -3   0    1.97    0.82
 -15  -3   0   -0.48    0.84
 -15  -3   0    0.29    1.10
 -15  -3   0    0.89    1.38
  15   3   0    0.31    0.87
  15   3   0    1.02    1.08
 -16  -3   0    0.93    1.03
 -16  -3   0    2.21    1.34
 -16  -3   0   -0.54    1.39
  16   3   0   -0.03    1.02
  16   3   0   -0.77    1.18
 -17  -3   0    2.46    1.61
  17   3   0    1.30    2.03
  17   3   0    0.28    1.48
  15  -4   0   -0.40    1.28
  15  -4   0    1.35    1.60
  15  -4   0   -0.63    1.36
  15  -4   0   -1.20    1.31
 -15   4   0   -0.37    1.30
 -15   4   0   -1.32    1.49
 -15   4   0    0.27    1.35
  14  -4   0    2.22    1.31
  14  -4   0    0.77    1.41
  14  -4   0    1.93    1.19
  14  -4   0    3.51    1.20
 -14   4   0    0.47    1.15
 -14   4   0    1.54    1.22
 -14   4   0    2.84    1.26
  13  -4   0   -0.38    1.04
  13  -4   0    0.60    1.01
  13  -4   0    0.78    1.21
  13  -4   0    0.52    1.03
 -13   4   0    1.05    1.00
 -13   4   0    0.50    1.05
 -13   4   0    2.71    1.17
 -13   4   0   -2.55    1.04
  12  -4   0    3.67    1.16
  12  -4   0    5.46    1.01
  12  -4   0    4.79    1.06
  12  -4   0    3.30    1.10
 -12   4   0    3.61    1.04
 -12   4   0    4.84    1.06
 -12   4   0    3.84    1.55
 -12   4   0    6.24    1.07
 -12   4   0    3.39    1.06
  11  -4   0   -0.78    0.76
  11  -4   0   -0.17    0.93
  11  -4   0    0.65    0.93
  11  -4   0    0.61    0.77
  11  -4   0    0.53    0.77
  11  -4   0    0.65    0.76
 -11   4   0    2.02    0.87
 -11   4   0    1.20    0.83
 -11   4   0    1.79    0.89
 -11   4   0    0.05    0.97
 -11   4   0    0.96    0.80
 -11   4   0    1.98    1.44
  10  -4   0    0.98    0.72
  10  -4   0    1.87    0.74
  10  -4   0    1.82    0.80
  10  -4   0    0.73    0.64
  10  -4   0    2.00    0.77
  10  -4   0    0.68    0.84
 -10   4   0    1.26    0.70
 -10   4   0    1.32    0.79
 -10   4   0    1.21    0.73
 -10   4   0    1.21    0.65
 -10   4   0    0.86    0.81
 -10   4   0    1.95    0.78
   9  -4   0    1.43    0.60
   9  -4   0    0.18    0.61
   9  -4   0    0.46    0.76
   9  -4   0    0.00    0.49
   9  -4   0   -0.17    0.60
   9  -4   0    0.59    0.69
   9  -4   0   -1.28    0.65
   9  -4   0    1.33    0.68
  -9   4   0    0.35    0.65
  -9   4   0    1.12    0.88
  -9   4   0   -0.34    0.64
  -9   4   0   -0.02    0.61
  -9   4   0    1.34    0.69
  -9   4   0    0.80    0.65
  -9   4   0    0.91    0.63
  -9   4   0   -0.62    0.75
  -9   4   0    0.68    0.54
   8  -4   0   12.33    1.11
   8  -4   0    9.57    1.10
   8  -4   0   12.03    0.97
   8  -4   0    9.84    0.97
   8  -4   0   11.50    1.01
   8  -4   0   11.27    1.06
   8  -4   0   11.20    1.03
   8  -4   0   10.15    1.09
   8  -4   0   13.66    1.14
  -8   4   0   11.02    0.95
  -8   4   0   11.05    1.13
  -8   4   0   12.90    1.10
  -8   4   0   10.94    1.01
  -8   4   0   10.89    1.05
  -8   4   0   11.07    1.03
  -8   4   0   12.76    1.07
  -8   4   0   12.65    1.14
  -8   4   0   10.53    1.06
   7  -4   0    6.37    0.78
   7  -4   0    8.27    0.94
   7  -4   0    7.33    0.95
   7  -4   0    7.10    0.86
   7  -4   0    6.82    0.75
   7  -4   0    7.42    0.80
   7  -4   0    6.63    0.82
   7  -4   0    7.29    0.74
   7  -4   0    6.40    0.74
  -7   4   0    7.12    0.84
  -7   4   0    7.21    0.77
  -7   4   0    6.46    0.69
  -7   4   0    6.58    0.74
  -7   4   0    6.93    0.93
  -7   4   0    8.39    0.90
  -7   4   0    6.80    0.88
  -7   4   0    6.91    0.86
  -7   4   0    6.96    0.83
   6  -4   0   11.91    0.86
   6  -4   0   10.50    0.85
   6  -4   0   10.57    0.81
   6  -4   0   10.11    0.89
   6  -4   0   10.01    0.89
   6  -4   0   10.94    0.83
   6  -4   0   11.84    0.84
   6  -4   0   11.36    0.85
   6  -4   0   10.67    0.85
  -6   4   0    9.64    0.88
  -6   4   0   11.41    0.90
  -6   4   0   10.70    0.85
  -6   4   0   12.06    0.89
  -6   4   0   10.47    0.82
  -6   4   0   10.58    0.93
  -6   4   0    9.41    0.83
  -6   4   0    9.85    1.02
  -6   4   0   10.23    0.80
   5  -4   0    6.77    0.67
   5  -4   0    5.02    0.61
   5  -4   0    5.52    0.69
   5  -4   0    5.89    0.59
   5  -4   0    5.56    0.71
   5  -4   0    5.01    0.60
   5  -4   0    5.68    0.66
   5  -4   0    5.42    0.58
   5  -4   0    5.94    0.31
   5  -4   0    6.78    0.67
  -5   4   0    4.85    0.67
  -5   4   0    6.37    0.65
  -5   4   0    5.71    0.59
  -5   4   0    6.48    0.67
  -5   4   0    5.81    0.65
  -5   4   0    6.30    0.79
  -5   4   0    6.43    0.74
  -5   4   0    7.01    0.72
  -5   4   0    5.38    0.31
  -5   4   0    5.62    0.62
   4  -4   0    7.50    0.65
   4  -4   0    7.37    0.71
   4  -4   0    7.08    0.68
   4  -4   0    7.35    0.37
   4  -4   0    6.67    0.84
   4  -4   0    6.67    0.67
   4  -4   0    6.58    0.67
   4  -4   0    6.93    0.68
   4  -4   0    6.58    0.69
   4  -4   0    7.18    0.66
  -4   4   0    6.82    0.68
  -4   4   0    6.78    0.66
  -4   4   0    7.27    0.71
  -4   4   0    5.68    0.65
  -4   4   0    7.21    0.70
  -4   4   0    5.99    0.62
  -4   4   0    6.97    0.67
  -4   4   0    6.08    0.59
  -4   4   0    7.35    0.36
   3  -4   0    3.67    0.46
   3  -4   0    3.62    0.40
   3  -4   0    4.36    0.53
   3  -4   0    3.33    0.47
   3  -4   0    4.64    0.70
   3  -4   0    3.63    0.45
   3  -4   0    5.91    0.66
   3  -4   0    4.41    0.49
   3  -4   0    3.19    0.34
  -3   4   0    2.96    0.40
  -3   4   0    4.09    0.46
  -3   4   0    3.79    0.48
  -3   4   0    3.33    0.35
  -3   4   0    2.58    0.52
  -3   4   0    3.52    0.45
  -3   4   0    3.39    0.46
  -3   4   0    3.90    0.45
  -3   4   0    3.53    0.48
   2  -4   0   15.62    0.76
   2  -4   0   15.78    0.55
   2  -4   0   15.86    0.72
   2  -4   0   16.90    0.72
   2  -4   0   16.29    0.71
   2  -4   0   15.23    0.70
   2  -4   0   16.15    0.61
   2  -4   0   15.68    0.75
  -2   4   0   15.44    0.56
  -2   4   0   15.64    0.72
  -2   4   0   15.59    0.72
  -2   4   0   15.76    0.68
  -2   4   0   17.05    0.76
  -2   4   0   14.59    0.71
  -2   4   0   15.14    0.72
  -2   4   0   15.65    0.74
  -2   4   0   15.85    0.60
   1  -4   0    0.79    0.34
   1  -4   0    0.89    0.44
   1  -4   0    0.02    0.28
   1  -4   0    0.63    0.26
   1  -4   0    0.94    0.22
   1  -4   0    0.43    0.31
   1  -4   0    0.59    0.34
   1  -4   0    0.88    0.31
   1  -4   0    0.71    0.32
   1  -4   0    0.97    0.31
  -1   4   0    0.60    0.34
  -1   4   0    0.79    0.34
  -1   4   0    0.44    0.31
  -1   4   0    0.39    0.20
  -1   4   0    0.86    0.27
  -1   4   0    0.57    0.32
  -1   4   0    0.90    0.31
  -1   4   0    0.81    0.35
  -1   4   0    0.11    0.30
  -1   4   0    0.54    0.28
   0  -4   0   18.10    0.64
   0  -4   0   18.12    0.66
   0  -4   0   18.25    0.69
   0  -4   0   19.51    0.69
   0  -4   0   18.56    0.70
   0  -4   0   19.54    0.74
   0  -4   0   18.47    0.69
   0  -4   0   18.14    0.68
   0  -4   0   17.46    0.67
   0   4   0   18.22    0.68
   0   4   0   19.29    0.71
   0   4   0   18.59    0.44
   0   4   0   18.71    0.67
   0   4   0   16.77    0.63
   0   4   0   18.89    0.67
   0   4   0   17.29    0.67
   0   4   0   18.18    0.68
   0   4   0   18.63    0.44
   0   4   0   18.60    0.68
   0   4   0   19.41    0.70
  -1  -4   0   11.83    0.54
  -1  -4   0   12.49    0.60
  -1  -4   0   12.18    0.54
  -1  -4   0   12.23    0.59
  -1  -4   0   12.02    0.55
  -1  -4   0   12.13    0.53
  -1  -4   0   12.65    0.57
  -1  -4   0   12.34    0.54
  -1  -4   0   12.52    0.53
   1   4   0   12.09    0.57
   1   4   0   12.47    0.56
   1   4   0   11.22    0.53
   1   4   0   12.02    0.53
   1   4   0   11.97    0.54
   1   4   0   12.42    0.57
   1   4   0   11.80    0.57
  -2  -4   0   73.79    1.51
  -2  -4   0   72.01    1.58
  -2  -4   0   72.65    1.56
  -2  -4   0   70.95    1.29
  -2  -4   0   70.73    1.43
  -2  -4   0   71.50    1.47
  -2  -4   0   71.51    1.43
  -2  -4   0   71.93    1.55
  -2  -4   0   72.27    1.47
   2   4   0   70.48    1.48
   2   4   0   71.13    1.43
   2   4   0   73.00    1.55
   2   4   0   72.91    1.57
   2   4   0   72.29    1.43
   2   4   0   72.07    1.49
   2   4   0   72.38    1.29
  -3  -4   0    0.43    0.22
  -3  -4   0   -0.08    0.30
  -3  -4   0    0.21    0.23
  -3  -4   0    0.24    0.19
  -3  -4   0    0.22    0.19
  -3  -4   0    0.30    0.19
  -3  -4   0    0.53    0.30
  -3  -4   0    0.25    0.33
  -3  -4   0    0.26    0.23
  -3  -4   0    0.62    0.25
   3   4   0    0.40    0.19
   3   4   0    0.83    0.25
   3   4   0    0.51    0.36
   3   4   0    0.82    0.24
   3   4   0    0.48    0.20
   3   4   0    0.42    0.32
   3   4   0    0.24    0.23
   3   4   0    0.55    0.26
   3   4   0    0.55    0.20
   3   4   0    0.11    0.37
  -4  -4   0    0.29    0.24
  -4  -4   0    0.04    0.28
  -4  -4   0    0.41    0.18
  -4  -4   0    0.73    0.36
  -4  -4   0    0.31    0.18
  -4  -4   0    0.02    0.24
  -4  -4   0    0.30    0.23
  -4  -4   0    0.19    0.25
   4   4   0    0.25    0.25
   4   4   0    0.12    0.38
   4   4   0    0.53    0.26
   4   4   0    0.10    0.32
   4   4   0    0.22    0.19
   4   4   0    0.23    0.23
   4   4   0    0.43    0.25
   4   4   0    0.57    0.19
  -5  -4   0   42.38    0.98
  -5  -4   0   42.07    0.98
  -5  -4   0   43.81    0.91
  -5  -4   0   40.75    1.26
  -5  -4   0   41.40    0.91
  -5  -4   0   40.06    1.04
  -5  -4   0   43.16    0.90
  -5  -4   0   44.43    1.26
  -5  -4   0   42.92    0.91
  -5  -4   0   35.80    1.54
  -5  -4   0   41.07    1.03
   5   4   0   40.50    1.22
   5   4   0   42.01    1.26
   5   4   0   42.34    1.01
   5   4   0   42.71    1.10
   5   4   0   42.38    1.05
   5   4   0   42.26    1.14
   5   4   0   41.99    1.00
  -6  -4   0   13.46    0.48
  -6  -4   0   11.69    0.85
  -6  -4   0   13.13    0.54
  -6  -4   0   12.80    0.46
  -6  -4   0   10.83    0.78
  -6  -4   0   13.10    0.62
  -6  -4   0   13.15    0.47
  -6  -4   0   13.16    0.83
  -6  -4   0   13.59    0.55
  -6  -4   0   13.40    0.68
  -6  -4   0   12.91    0.69
  -6  -4   0   12.92    0.46
  -6  -4   0   13.15    0.59
   6   4   0   13.00    0.71
   6   4   0   12.75    0.62
   6   4   0   12.84    0.57
   6   4   0   11.89    0.82
   6   4   0   12.47    0.68
   6   4   0   12.92    0.59
   6   4   0   13.37    0.57
  -7  -4   0    1.91    0.40
  -7  -4   0    2.79    0.55
  -7  -4   0    2.01    0.36
  -7  -4   0    2.32    0.26
  -7  -4   0    2.20    0.33
  -7  -4   0    2.18    0.34
  -7  -4   0    2.52    0.29
  -7  -4   0    1.71    0.36
  -7  -4   0    1.92    0.53
  -7  -4   0    2.49    0.29
  -7  -4   0    2.84    0.47
  -7  -4   0    2.64    0.29
  -7  -4   0    1.97    0.59
   7   4   0    2.43    0.37
   7   4   0    2.34    0.51
   7   4   0    2.72    0.49
   7   4   0    2.71    0.41
   7   4   0    2.13    0.35
   7   4   0    2.48    0.37
   7   4   0    2.34    0.42
  -8  -4   0    2.50    0.58
  -8  -4   0    2.31    0.43
  -8  -4   0    3.07    0.33
  -8  -4   0    1.84    0.36
  -8  -4   0    1.76    0.43
  -8  -4   0    1.99    0.40
  -8  -4   0    3.00    0.38
  -8  -4   0    2.35    0.34
  -8  -4   0    2.99    0.69
  -8  -4   0    2.48    0.53
  -8  -4   0    1.81    0.59
  -8  -4   0    2.37    0.32
  -8  -4   0    2.08    0.29
   8   4   0    2.91    0.57
   8   4   0    2.13    0.40
   8   4   0    2.50    0.41
   8   4   0    1.91    0.41
   8   4   0    1.50    0.52
   8   4   0    1.65    0.37
   8   4   0    1.90    0.42
  -9  -4   0    9.58    0.60
  -9  -4   0   10.41    0.76
  -9  -4   0   10.63    1.09
  -9  -4   0    8.85    0.71
  -9  -4   0    8.60    0.82
  -9  -4   0   10.32    0.65
  -9  -4   0    8.45    0.88
  -9  -4   0   10.52    0.76
  -9  -4   0   12.16    1.09
  -9  -4   0   10.12    1.01
  -9  -4   0    9.73    0.57
   9   4   0    8.52    1.00
   9   4   0    9.20    0.67
   9   4   0    8.52    0.74
   9   4   0   10.44    0.74
   9   4   0    9.95    0.71
   9   4   0   10.49    0.97
   9   4   0   10.73    0.56
   9   4   0   10.22    0.72
 -10  -4   0   -0.25    0.76
 -10  -4   0   -0.25    0.45
 -10  -4   0    1.37    0.76
 -10  -4   0   -0.68    0.40
 -10  -4   0    0.11    0.35
 -10  -4   0   -0.09    0.54
 -10  -4   0   -0.42    0.38
 -10  -4   0    0.47    0.35
 -10  -4   0   -0.19    0.34
 -10  -4   0   -0.24    0.59
 -10  -4   0   -0.07    0.41
  10   4   0    0.28    0.46
  10   4   0   -0.11    0.40
  10   4   0    0.03    0.66
  10   4   0   -0.72    0.62
  10   4   0    0.15    0.44
  10   4   0    0.44    0.32
  10   4   0   -0.18    0.44
  10   4   0    0.13    0.44
 -11  -4   0    7.36    0.69
 -11  -4   0    8.74    0.76
 -11  -4   0    6.54    0.94
 -11  -4   0    8.69    0.83
 -11  -4   0    8.98    1.00
 -11  -4   0    8.37    0.97
 -11  -4   0    7.87    0.88
 -11  -4   0    7.72    0.72
  11   4   0    8.55    0.91
  11   4   0    8.89    0.67
  11   4   0    8.65    1.01
  11   4   0    7.98    0.84
  11   4   0    7.87    0.79
 -12  -4   0    1.28    0.52
 -12  -4   0    0.86    0.57
 -12  -4   0   -0.30    1.09
 -12  -4   0   -0.02    0.74
 -12  -4   0    0.07    0.46
 -12  -4   0    1.33    0.51
 -12  -4   0    1.35    0.59
 -12  -4   0    0.73    0.55
  12   4   0    0.97    0.56
  12   4   0   -0.39    0.76
  12   4   0    0.34    0.42
  12   4   0    1.00    0.62
  12   4   0    1.20    0.50
 -13  -4   0    1.47    0.63
 -13  -4   0    0.87    0.52
 -13  -4   0    0.68    1.05
 -13  -4   0    1.27    0.70
 -13  -4   0    1.82    0.63
 -13  -4   0    2.83    0.75
 -13  -4   0    0.16    0.63
 -13  -4   0    1.64    1.01
 -13  -4   0    2.21    0.61
  13   4   0    3.20    0.54
  13   4   0    2.76    0.77
  13   4   0    1.52    0.76
  13   4   0    3.01    0.97
  13   4   0    1.16    0.66
  13   4   0    2.80    0.57
 -14  -4   0    2.76    0.74
 -14  -4   0    3.83    0.74
 -14  -4   0    1.47    1.09
 -14  -4   0    1.46    1.02
 -14  -4   0    2.99    0.82
 -14  -4   0    2.54    0.64
 -14  -4   0    1.12    0.77
  14   4   0    1.05    0.84
  14   4   0    4.36    1.14
  14   4   0    2.73    0.59
  14   4   0    2.57    0.86
  14   4   0    1.87    0.61
 -15  -4   0   -0.93    1.25
 -15  -4   0    0.37    0.87
 -15  -4   0    1.68    1.09
  15   4   0    0.52    1.10
  15   4   0    0.25    0.88
 -16  -4   0   -0.69    0.92
 -16  -4   0    1.08    1.33
 -16  -4   0    0.84    1.41
  16   4   0   -1.41    0.99
  16   4   0   -0.92    1.22
 -17  -4   0   -2.08    1.45
 -17  -4   0   -1.69    1.98
  17   4   0    2.31    1.53
  17   4   0   -0.47    1.51
  15  -5   0   -2.07    1.40
  15  -5   0    0.03    1.44
  15  -5   0   -0.21    1.66
  15  -5   0    1.29    1.40
 -15   5   0    2.85    1.50
 -15   5   0    0.87    1.50
 -15   5   0   -1.41    1.43
  14  -5   0    1.75    1.39
  14  -5   0    1.10    1.23
  14  -5   0    2.19    1.34
  14  -5   0    1.76    1.48
 -14   5   0   -1.00    1.19
 -14   5   0    1.03    1.30
 -14   5   0    0.10    1.29
  13  -5   0    3.08    1.35
  13  -5   0    3.30    1.13
  13  -5   0    3.27    1.17
  13  -5   0    2.61    1.22
 -13   5   0    3.44    1.19
 -13   5   0    2.33    1.21
 -13   5   0    4.12    1.23
  12  -5   0    0.78    0.88
  12  -5   0    1.33    1.10
  12  -5   0   -0.47    0.95
  12  -5   0   -0.01    1.04
 -12   5   0    0.35    0.96
 -12   5   0   -0.16    1.04
 -12   5   0    0.32    0.97
 -12   5   0   -1.58    0.95
  11  -5   0    4.00    1.00
  11  -5   0    3.36    0.88
  11  -5   0    3.78    0.97
  11  -5   0    4.28    1.12
  11  -5   0    3.34    1.18
 -11   5   0    3.68    1.03
 -11   5   0    5.56    1.05
 -11   5   0    3.13    0.99
 -11   5   0    5.49    1.04
 -11   5   0    3.49    0.99
 -11   5   0    4.20    1.02
  10  -5   0    8.00    1.14
  10  -5   0    8.44    0.98
  10  -5   0    7.46    0.93
  10  -5   0    6.41    0.92
  10  -5   0    4.79    0.92
 -10   5   0   10.30    1.32
 -10   5   0    6.38    1.00
 -10   5   0    9.81    1.16
 -10   5   0    8.78    1.17
 -10   5   0    6.99    0.95
 -10   5   0    6.10    0.98
   9  -5   0   14.96    1.32
   9  -5   0   13.08    1.24
   9  -5   0   12.80    1.29
   9  -5   0   15.35    1.30
   9  -5   0   13.11    1.40
   9  -5   0   12.32    1.21
   9  -5   0   14.50    1.23
  -9   5   0   13.20    1.37
  -9   5   0   14.61    1.36
  -9   5   0   12.22    1.29
  -9   5   0   11.79    1.36
  -9   5   0   14.14    1.24
  -9   5   0   12.33    1.18
  -9   5   0   13.82    1.30
   8  -5   0    0.50    0.55
   8  -5   0    0.52    0.60
   8  -5   0   -1.10    0.64
   8  -5   0    0.81    0.57
   8  -5   0   -0.61    0.57
   8  -5   0   -0.37    0.57
   8  -5   0    0.82    0.69
   8  -5   0   -0.54    0.68
   8  -5   0    0.21    0.64
  -8   5   0    0.66    0.59
  -8   5   0   -0.02    0.56
  -8   5   0    1.17    0.73
  -8   5   0    0.59    0.77
  -8   5   0    1.19    0.62
  -8   5   0    0.75    0.56
  -8   5   0    0.72    0.62
  -8   5   0    0.37    0.64
  -8   5   0   -0.42    0.64
   7  -5   0    1.15    0.60
   7  -5   0    0.38    0.55
   7  -5   0    1.03    0.49
   7  -5   0    0.85    0.51
   7  -5   0    1.08    0.60
   7  -5   0    0.52    0.63
   7  -5   0    0.88    0.56
   7  -5   0    1.10    0.60
   7  -5   0    0.99    0.57
  -7   5   0    0.68    0.67
  -7   5   0    1.58    0.54
  -7   5   0    0.76    0.54
  -7   5   0    0.98    0.55
  -7   5   0    0.63    0.56
  -7   5   0    1.42    0.60
  -7   5   0    1.61    0.61
  -7   5   0    1.18    0.59
  -7   5   0    2.14    0.64
   6  -5   0    0.46    0.20
   6  -5   0    0.07    0.48
   6  -5   0    0.63    0.48
   6  -5   0    0.12    0.50
   6  -5   0    0.37    0.45
   6  -5   0    0.22    0.47
   6  -5   0    0.24    0.49
   6  -5   0    0.54    0.49
   6  -5   0    0.29    0.45
   6  -5   0    0.34    0.48
   6  -5   0    0.25    0.18
  -6   5   0    0.24    0.45
  -6   5   0    0.48    0.47
  -6   5   0   -0.06    0.46
  -6   5   0    0.09    0.46
  -6   5   0    0.27    0.53
  -6   5   0   -0.22    0.51
  -6   5   0   -1.16    0.52
  -6   5   0   -0.16    0.44
  -6   5   0    0.15    0.80
   5  -5   0    0.47    0.22
   5  -5   0   -0.45    0.41
   5  -5   0    0.30    0.42
   5  -5   0    0.07    0.44
   5  -5   0   -0.29    0.41
   5  -5   0    0.48    0.45
   5  -5   0    0.51    0.37
   5  -5   0    0.19    0.45
   5  -5   0   -0.29    0.48
   5  -5   0    0.04    0.43
  -5   5   0    0.01    0.42
  -5   5   0   -0.30    0.38
  -5   5   0    0.02    0.36
  -5   5   0   -0.27    0.45
  -5   5   0   -0.10    0.38
  -5   5   0    0.15    0.20
  -5   5   0   -0.47    0.48
  -5   5   0   -0.17    0.40
  -5   5   0    0.55    0.66
   4  -5   0    2.59    0.50
   4  -5   0    1.65    0.44
   4  -5   0    2.97    0.50
   4  -5   0    1.83    0.46
   4  -5   0    1.31    0.42
   4  -5   0    2.32    0.44
   4  -5   0    2.67    0.51
   4  -5   0    2.22    0.45
   4  -5   0    2.94    0.54
   4  -5   0    2.66    0.30
  -4   5   0    1.15    0.49
  -4   5   0    2.69    0.43
  -4   5   0    2.12    0.49
  -4   5   0    2.26    0.47
  -4   5   0    1.63    0.45
  -4   5   0    2.31    0.46
  -4   5   0    2.46    0.29
  -4   5   0    1.55    0.41
  -4   5   0    1.47    0.45
  -4   5   0    2.31    0.51
   3  -5   0   88.07    2.12
   3  -5   0   89.07    2.07
   3  -5   0   89.27    2.01
   3  -5   0   90.75    2.12
   3  -5   0   89.06    2.05
   3  -5   0   91.00    2.12
   3  -5   0   89.87    2.05
   3  -5   0   91.87    1.82
  -3   5   0   90.69    2.06
  -3   5   0   92.10    2.12
  -3   5   0   90.78    2.12
  -3   5   0   90.42    2.11
  -3   5   0   92.34    2.07
  -3   5   0   91.11    2.00
  -3   5   0   91.47    1.81
  -3   5   0   88.64    2.05
  -3   5   0   86.65    2.12
  -3   5   0   90.69    1.92
   2  -5   0    7.55    0.64
   2  -5   0    7.29    0.64
   2  -5   0    8.42    0.82
   2  -5   0    6.69    0.49
   2  -5   0    6.57    0.61
   2  -5   0    7.16    0.66
   2  -5   0    8.82    0.82
   2  -5   0    6.97    0.65
   2  -5   0    5.81    0.59
   2  -5   0    7.14    0.47
  -2   5   0    6.34    0.51
  -2   5   0    6.15    0.47
  -2   5   0    8.62    0.80
  -2   5   0    6.73    0.63
  -2   5   0    8.26    0.82
  -2   5   0    6.46    0.62
  -2   5   0    7.36    0.66
  -2   5   0    6.78    0.73
  -2   5   0    6.37    0.64
   1  -5   0    2.00    0.39
   1  -5   0    1.97    0.33
   1  -5   0    1.40    0.37
   1  -5   0    2.20    0.40
   1  -5   0    1.98    0.36
   1  -5   0    2.01    0.39
   1  -5   0    2.31    0.26
   1  -5   0    2.20    0.49
   1  -5   0    2.12    0.42
  -1   5   0    1.92    0.39
  -1   5   0    1.64    0.24
  -1   5   0    2.58    0.53
  -1   5   0    1.89    0.38
  -1   5   0    2.03    0.41
  -1   5   0    1.98    0.35
  -1   5   0    2.56    0.45
  -1   5   0    2.23    0.35
  -1   5   0    2.06    0.39
  -1   5   0    1.40    0.37
   0  -5   0   49.58    1.24
   0  -5   0   50.89    1.22
   0  -5   0   48.82    1.26
   0  -5   0   49.67    1.25
   0  -5   0   50.65    1.24
   0  -5   0   52.41    1.29
   0  -5   0   46.76    1.44
   0  -5   0   49.97    1.29
   0  -5   0   49.23    1.27
   0   5   0   51.29    1.25
   0   5   0   50.97    0.97
   0   5   0   50.51    1.27
   0   5   0   50.01    1.25
   0   5   0   47.45    1.24
   0   5   0   47.77    1.43
   0   5   0   50.86    1.24
   0   5   0   50.68    0.97
   0   5   0   47.81    1.27
  -1  -5   0    7.75    0.53
  -1  -5   0    9.26    0.56
  -1  -5   0    7.49    0.57
  -1  -5   0    8.23    0.54
  -1  -5   0    7.19    0.56
  -1  -5   0    8.00    0.54
  -1  -5   0    8.85    0.55
  -1  -5   0    8.00    0.61
  -1  -5   0    7.80    0.58
   1   5   0    8.45    0.56
   1   5   0    9.31    0.60
   1   5   0    7.63    0.57
   1   5   0    8.41    0.60
   1   5   0    8.37    0.54
   1   5   0    8.21    0.58
   1   5   0    8.46    0.56
  -2  -5   0    9.69    0.58
  -2  -5   0    9.92    0.63
  -2  -5   0    9.19    0.55
  -2  -5   0    8.92    0.62
  -2  -5   0    9.29    0.62
  -2  -5   0    9.19    0.50
  -2  -5   0    9.95    0.53
  -2  -5   0   10.07    0.53
  -2  -5   0    9.01    0.52
   2   5   0    9.71    0.51
   2   5   0    9.29    0.60
   2   5   0    9.59    0.51
   2   5   0    9.07    0.61
   2   5   0   10.53    0.54
   2   5   0    9.10    0.54
   2   5   0    7.98    0.73
  -3  -5   0   10.47    0.66
  -3  -5   0   10.25    0.66
  -3  -5   0   11.02    0.48
  -3  -5   0   10.73    0.38
  -3  -5   0   11.17    0.64
  -3  -5   0   10.72    0.52
  -3  -5   0    9.72    0.48
  -3  -5   0   10.77    0.55
  -3  -5   0    9.85    0.55
   3   5   0   11.44    0.49
   3   5   0   10.39    0.56
   3   5   0   11.18    0.69
   3   5   0   10.64    0.53
   3   5   0   10.60    0.38
   3   5   0   10.93    0.48
   3   5   0   10.38    0.65
   3   5   0   11.82    0.55
  -4  -5   0    3.29    0.40
  -4  -5   0    3.20    0.41
  -4  -5   0    4.43    0.52
  -4  -5   0    3.30    0.43
  -4  -5   0    3.49    0.48
  -4  -5   0    3.36    0.30
  -4  -5   0    2.95    0.38
  -4  -5   0    2.65    0.28
  -4  -5   0    2.70    0.33
  -4  -5   0    3.03    0.41
   4   5   0    2.86    0.34
   4   5   0    3.73    0.51
   4   5   0    2.47    0.41
   4   5   0    3.00    0.34
   4   5   0    3.34    0.35
   4   5   0    3.16    0.33
   4   5   0    2.73    0.35
   4   5   0    2.80    0.47
   4   5   0    2.70    0.36
   4   5   0    3.28    0.30
  -5  -5   0    0.31    0.25
  -5  -5   0    0.68    0.41
  -5  -5   0    0.39    0.21
  -5  -5   0   -0.42    0.25
  -5  -5   0    0.19    0.19
  -5  -5   0    0.01    0.34
  -5  -5   0   -0.02    0.26
  -5  -5   0    0.37    0.42
  -5  -5   0    0.48    0.25
  -5  -5   0   -0.13    0.26
  -5  -5   0    0.62    0.19
   5   5   0   -0.10    0.24
   5   5   0    0.42    0.43
   5   5   0   -0.55    0.34
   5   5   0    0.13    0.19
   5   5   0   -0.09    0.27
   5   5   0    0.06    0.36
   5   5   0    0.15    0.21
   5   5   0    0.05    0.27
   5   5   0   -0.13    0.26
   5   5   0    0.26    0.26
  -6  -5   0    1.74    0.23
  -6  -5   0    1.91    0.44
  -6  -5   0    1.26    0.34
  -6  -5   0    1.38    0.24
  -6  -5   0    1.44    0.24
  -6  -5   0    1.74    0.32
  -6  -5   0    1.41    0.23
  -6  -5   0    1.25    0.50
  -6  -5   0    1.59    0.31
  -6  -5   0    2.14    0.51
  -6  -5   0    1.35    0.33
  -6  -5   0    1.77    0.30
   6   5   0    1.99    0.33
   6   5   0    1.46    0.33
   6   5   0    1.34    0.32
   6   5   0    1.30    0.31
   6   5   0    1.15    0.49
   6   5   0    0.88    0.48
   6   5   0    1.55    0.42
   6   5   0    1.16    0.35
  -7  -5   0    0.47    0.46
  -7  -5   0    1.83    0.24
  -7  -5   0    1.03    0.53
  -7  -5   0    1.06    0.26
  -7  -5   0    1.18    0.24
  -7  -5   0    0.58    0.35
  -7  -5   0    1.76    0.26
  -7  -5   0    1.32    0.30
  -7  -5   0    1.19    0.36
  -7  -5   0    1.20    0.40
  -7  -5   0    1.25    0.33
  -7  -5   0    0.27    0.50
  -7  -5   0    1.59    0.31
   7   5   0    0.94    0.39
   7   5   0    1.41    0.54
   7   5   0    1.80    0.43
   7   5   0    1.52    0.33
   7   5   0    0.95    0.33
   7   5   0    1.26    0.32
   7   5   0    1.15    0.36
  -8  -5   0   -0.24    0.24
  -8  -5   0    0.17    0.35
  -8  -5   0   -0.34    0.37
  -8  -5   0   -0.60    0.29
  -8  -5   0    0.73    0.60
  -8  -5   0   -0.25    0.23
  -8  -5   0    0.06    0.22
  -8  -5   0    0.21    0.49
  -8  -5   0   -0.22    0.57
  -8  -5   0    0.01    0.53
  -8  -5   0   -0.26    0.32
  -8  -5   0    0.27    0.42
  -8  -5   0   -0.41    0.24
   8   5   0   -0.32    0.43
   8   5   0    0.33    0.34
   8   5   0    0.61    0.33
   8   5   0   -0.25    0.33
   8   5   0    0.29    0.51
   8   5   0    0.02    0.34
   8   5   0    0.02    0.39
  -9  -5   0    5.09    0.79
  -9  -5   0    5.55    0.62
  -9  -5   0    4.13    0.53
  -9  -5   0    4.01    0.46
  -9  -5   0    4.00    0.47
  -9  -5   0    4.59    0.57
  -9  -5   0    4.58    0.63
  -9  -5   0    4.32    0.40
  -9  -5   0    5.30    0.82
  -9  -5   0    3.92    0.83
  -9  -5   0    4.20    0.53
  -9  -5   0    3.94    0.43
   9   5   0    4.21    0.56
   9   5   0    4.25    0.68
   9   5   0    4.46    0.52
   9   5   0    4.84    0.52
   9   5   0    4.71    0.57
   9   5   0    4.02    0.74
 -10  -5   0    0.11    0.53
 -10  -5   0    0.58    0.48
 -10  -5   0    0.16    0.75
 -10  -5   0    0.34    0.76
 -10  -5   0    0.71    0.46
 -10  -5   0    1.59    0.37
 -10  -5   0    0.36    0.39
 -10  -5   0    0.16    0.88
 -10  -5   0    0.17    0.34
 -10  -5   0    0.61    0.39
 -10  -5   0    0.75    0.29
 -10  -5   0    1.05    0.57
  10   5   0    0.65    0.44
  10   5   0    0.26    0.44
  10   5   0   -0.33    0.65
  10   5   0    0.46    0.48
  10   5   0    0.60    0.64
  10   5   0    0.27    0.43
 -11  -5   0   10.25    0.64
 -11  -5   0   12.34    1.02
 -11  -5   0    9.12    0.69
 -11  -5   0   10.45    0.95
 -11  -5   0   10.92    1.13
 -11  -5   0   10.15    0.76
 -11  -5   0    9.97    0.93
 -11  -5   0   10.74    0.70
 -11  -5   0    8.52    0.67
 -11  -5   0   11.66    1.23
  11   5   0   10.26    1.02
  11   5   0   10.89    0.94
  11   5   0   12.05    0.86
  11   5   0   10.27    1.27
  11   5   0    9.86    0.89
 -12  -5   0   -0.34    0.39
 -12  -5   0    0.77    0.39
 -12  -5   0   -0.82    0.53
 -12  -5   0   -0.17    0.50
 -12  -5   0   -0.24    0.44
 -12  -5   0    0.76    0.73
 -12  -5   0    1.28    0.85
 -12  -5   0   -0.17    0.55
 -12  -5   0    0.56    0.64
 -12  -5   0    0.01    0.50
  12   5   0    0.10    0.53
  12   5   0    0.38    0.87
  12   5   0    0.41    0.60
  12   5   0   -0.41    0.57
  12   5   0    0.47    0.59
 -13  -5   0    0.00    0.58
 -13  -5   0    0.72    0.69
 -13  -5   0    0.26    0.47
 -13  -5   0    0.14    0.69
 -13  -5   0   -0.76    0.51
 -13  -5   0   -0.50    0.61
 -13  -5   0   -0.43    0.96
 -13  -5   0    0.16    0.43
 -13  -5   0    0.25    0.62
  13   5   0   -1.87    0.88
  13   5   0    1.05    0.69
  13   5   0    0.89    0.66
  13   5   0    0.25    0.59
 -14  -5   0    0.01    0.51
 -14  -5   0   -1.10    0.70
 -14  -5   0    1.08    0.98
 -14  -5   0    0.41    0.53
 -14  -5   0    0.93    1.08
 -14  -5   0    0.11    0.75
  14   5   0   -0.61    0.59
  14   5   0    0.75    0.80
  14   5   0    0.11    0.71
  14   5   0    0.13    1.08
  14   5   0   -0.62    1.00
 -15  -5   0    0.20    1.28
 -15  -5   0    0.17    0.83
 -15  -5   0   -0.27    1.10
  15   5   0   -0.10    0.86
 -16  -5   0   -0.60    1.24
 -16  -5   0   -0.66    0.92
 -16  -5   0   -0.62    1.23
  16   5   0   -1.31    1.26
  16   5   0   -0.43    0.98
 -17  -5   0   -1.70    2.45
 -17  -5   0    0.32    1.52
  17   5   0   -0.02    1.53
  17   5   0    1.51    1.46
  14  -6   0   -0.76    1.49
  14  -6   0    3.07    1.33
  14  -6   0    0.97    1.38
  14  -6   0   -0.71    1.40
 -14   6   0   -0.28    1.38
 -14   6   0   -0.03    1.38
 -14   6   0   -0.84    1.36
  13  -6   0    0.13    1.34
  13  -6   0    0.46    1.19
  13  -6   0    1.42    1.36
  13  -6   0    2.01    1.27
 -13   6   0    1.56    1.33
 -13   6   0    0.99    1.25
 -13   6   0    0.31    1.20
  12  -6   0   -0.33    0.95
  12  -6   0   -0.78    1.00
  12  -6   0   -0.12    0.96
  12  -6   0    0.10    1.18
 -12   6   0   -0.64    1.00
 -12   6   0   -0.84    1.09
 -12   6   0    2.44    1.13
  11  -6   0    1.74    0.86
  11  -6   0   -0.43    1.00
  11  -6   0    0.58    1.01
  11  -6   0    0.16    0.93
  11  -6   0   -0.30    0.95
 -11   6   0    1.93    1.04
 -11   6   0   -0.38    0.97
 -11   6   0    0.42    1.05
 -11   6   0    1.15    0.94
 -11   6   0    0.18    0.98
  10  -6   0    9.82    1.24
  10  -6   0   11.17    1.52
  10  -6   0   12.65    1.43
  10  -6   0   11.50    1.14
  10  -6   0   13.25    1.26
 -10   6   0   13.08    1.52
 -10   6   0   11.35    1.33
 -10   6   0   13.86    1.53
 -10   6   0   12.95    1.49
 -10   6   0   11.90    1.28
 -10   6   0   11.78    1.37
   9  -6   0   19.79    1.59
   9  -6   0   20.31    1.43
   9  -6   0   22.41    1.45
   9  -6   0   17.96    1.42
   9  -6   0   22.39    1.49
   9  -6   0   19.02    1.58
  -9   6   0   22.33    1.67
  -9   6   0   21.33    1.48
  -9   6   0   17.71    1.60
  -9   6   0   18.68    1.38
  -9   6   0   20.64    1.54
  -9   6   0   19.41    1.47
   8  -6   0   32.20    1.55
   8  -6   0   36.41    1.89
   8  -6   0   34.16    1.54
   8  -6   0   31.92    1.65
   8  -6   0   33.57    1.53
   8  -6   0   35.76    1.71
   8  -6   0   36.30    1.75
   8  -6   0   34.42    1.63
   8  -6   0   34.69    1.54
  -8   6   0   35.54    1.66
  -8   6   0   36.19    1.57
  -8   6   0   36.19    1.73
  -8   6   0   35.43    1.60
  -8   6   0   34.14    1.65
  -8   6   0   35.19    1.75
  -8   6   0   34.14    1.74
  -8   6   0   36.22    1.55
  -8   6   0   34.68    1.64
   7  -6   0    8.82    1.17
   7  -6   0   10.64    1.10
   7  -6   0    9.61    1.01
   7  -6   0    7.88    0.97
   7  -6   0    9.32    1.06
   7  -6   0    8.87    0.40
   7  -6   0   10.00    1.06
   7  -6   0    9.48    0.41
   7  -6   0    9.27    1.04
   7  -6   0    8.98    1.11
   7  -6   0    9.82    1.01
  -7   6   0    9.82    1.17
  -7   6   0   10.86    1.13
  -7   6   0   11.07    1.22
  -7   6   0    8.81    1.10
  -7   6   0    9.04    1.14
  -7   6   0    8.07    0.90
  -7   6   0    9.39    0.92
  -7   6   0   11.03    1.09
  -7   6   0    8.02    0.96
   6  -6   0    2.82    0.69
   6  -6   0    1.03    0.56
   6  -6   0    1.72    0.59
   6  -6   0    2.36    0.59
   6  -6   0    1.65    0.62
   6  -6   0    2.27    0.65
   6  -6   0    3.28    0.42
   6  -6   0    1.84    0.56
   6  -6   0    1.96    0.64
   6  -6   0    1.46    0.50
  -6   6   0    2.40    0.29
  -6   6   0    1.89    0.67
  -6   6   0    1.44    0.57
  -6   6   0    2.67    0.57
  -6   6   0    2.04    0.64
  -6   6   0    2.41    0.66
  -6   6   0    2.69    0.63
  -6   6   0    3.77    0.98
  -6   6   0    1.72    0.61
  -6   6   0    3.53    0.70
   5  -6   0    2.80    0.58
   5  -6   0    2.78    0.63
   5  -6   0    2.34    0.34
   5  -6   0    1.76    0.50
   5  -6   0    2.05    0.60
   5  -6   0    2.20    0.54
   5  -6   0    3.12    0.54
   5  -6   0    2.05    0.56
   5  -6   0    1.96    0.51
   5  -6   0    1.84    0.50
  -5   6   0    1.09    0.53
  -5   6   0    2.63    0.60
  -5   6   0    2.21    0.59
  -5   6   0    2.30    0.52
  -5   6   0    2.06    0.50
  -5   6   0    1.13    0.52
  -5   6   0    3.98    0.95
  -5   6   0    2.99    0.65
  -5   6   0    2.34    0.33
  -5   6   0    1.91    0.54
   4  -6   0   23.20    0.75
   4  -6   0   22.95    1.11
   4  -6   0   23.40    1.11
   4  -6   0   22.51    0.93
   4  -6   0   21.20    1.02
   4  -6   0   21.00    1.02
   4  -6   0   20.51    1.03
   4  -6   0   22.23    1.00
   4  -6   0   21.98    1.10
  -4   6   0   21.44    0.90
  -4   6   0   21.40    1.03
  -4   6   0   21.74    0.74
  -4   6   0   22.75    1.08
  -4   6   0   22.84    1.02
  -4   6   0   22.73    1.09
  -4   6   0   20.64    1.18
  -4   6   0   21.92    1.11
  -4   6   0   22.99    1.09
  -4   6   0   25.26    1.33
   3  -6   0   41.96    1.35
   3  -6   0   39.22    1.12
   3  -6   0   39.96    1.30
   3  -6   0   40.16    1.27
   3  -6   0   35.77    1.53
   3  -6   0   37.73    1.24
   3  -6   0   41.23    1.06
   3  -6   0   39.15    1.35
   3  -6   0   39.95    1.28
  -3   6   0   38.16    1.35
  -3   6   0   38.99    1.35
  -3   6   0   38.44    1.30
  -3   6   0   40.41    1.12
  -3   6   0   40.34    1.56
  -3   6   0   40.74    1.23
  -3   6   0   39.16    1.33
  -3   6   0   37.98    1.29
   2  -6   0   16.45    0.84
   2  -6   0   16.29    0.84
   2  -6   0   16.53    0.89
   2  -6   0   15.79    0.81
   2  -6   0   14.50    0.84
   2  -6   0   16.79    0.89
   2  -6   0   16.82    0.66
   2  -6   0   13.68    0.99
  -2   6   0   16.32    0.70
  -2   6   0   19.01    1.35
  -2   6   0   16.84    0.89
  -2   6   0   15.85    0.83
  -2   6   0   16.84    0.82
  -2   6   0   17.20    0.83
  -2   6   0   16.66    0.66
  -2   6   0   20.62    1.11
  -2   6   0   16.92    0.88
   1  -6   0  114.99    2.35
   1  -6   0  112.64    2.49
   1  -6   0  111.02    2.48
   1  -6   0  112.88    2.42
   1  -6   0  113.87    2.42
   1  -6   0  114.88    2.41
   1  -6   0  110.53    2.38
   1  -6   0  118.18    2.48
   1  -6   0  112.74    2.47
  -1   6   0  111.69    2.42
  -1   6   0  116.65    2.15
  -1   6   0  115.23    2.50
  -1   6   0  115.12    2.39
  -1   6   0  112.14    2.32
  -1   6   0  114.30    2.42
  -1   6   0  114.64    2.48
  -1   6   0  116.28    2.49
  -1   6   0  114.88    2.15
  -1   6   0  115.19    2.41
   0  -6   0   62.56    1.52
   0  -6   0   62.70    1.52
   0  -6   0   60.30    1.57
   0  -6   0   62.97    1.57
   0  -6   0   60.07    1.51
   0  -6   0   62.98    1.49
   0  -6   0   61.17    1.54
   0   6   0   60.83    1.56
   0   6   0   63.27    1.53
   0   6   0   61.47    1.49
   0   6   0   62.86    1.56
   0   6   0   62.71    1.52
   0   6   0   62.40    1.19
   0   6   0   63.46    1.57
   0   6   0   59.14    1.67
   0   6   0   62.90    1.19
  -1  -6   0   12.23    0.70
  -1  -6   0   13.39    0.70
  -1  -6   0   11.43    1.08
  -1  -6   0   13.62    0.75
  -1  -6   0   13.63    0.71
  -1  -6   0   12.82    0.68
  -1  -6   0   12.14    0.68
  -1  -6   0   13.31    0.67
  -1  -6   0   13.35    0.69
   1   6   0   12.97    0.67
   1   6   0   13.11    0.74
   1   6   0   13.09    0.69
   1   6   0   11.79    0.69
   1   6   0   11.28    0.64
   1   6   0   12.68    0.69
   1   6   0   12.14    0.69
  -2  -6   0    0.09    0.29
  -2  -6   0    0.19    0.36
  -2  -6   0    0.11    0.27
  -2  -6   0    0.25    0.35
  -2  -6   0    0.30    0.31
  -2  -6   0    0.22    0.29
  -2  -6   0    0.41    0.30
  -2  -6   0    0.19    0.32
  -2  -6   0   -0.33    0.31
   2   6   0    0.48    0.30
   2   6   0    0.18    0.34
   2   6   0    0.44    0.31
   2   6   0    0.03    0.29
   2   6   0    0.12    0.29
   2   6   0    0.44    0.36
  -3  -6   0    9.22    0.67
  -3  -6   0    8.74    0.31
  -3  -6   0    8.97    0.59
  -3  -6   0    9.25    0.58
  -3  -6   0    9.26    0.68
  -3  -6   0    8.02    0.52
  -3  -6   0    8.76    0.55
  -3  -6   0    8.21    0.67
  -3  -6   0    8.14    0.53
  -3  -6   0    8.09    0.65
  -3  -6   0    8.68    0.56
   3   6   0    9.47    0.58
   3   6   0    8.29    0.52
   3   6   0    8.70    0.65
   3   6   0    8.79    0.59
   3   6   0    7.54    0.59
   3   6   0    8.59    0.32
   3   6   0    9.56    0.67
   3   6   0    8.21    0.54
  -4  -6   0   70.34    1.75
  -4  -6   0   68.38    1.60
  -4  -6   0   69.96    1.54
  -4  -6   0   69.95    1.47
  -4  -6   0   71.26    1.48
  -4  -6   0   69.83    1.54
  -4  -6   0   72.31    1.71
  -4  -6   0   71.53    1.74
  -4  -6   0   70.51    1.76
  -4  -6   0   69.60    1.40
  -4  -6   0   69.68    1.59
   4   6   0   70.23    1.47
   4   6   0   69.38    1.55
   4   6   0   71.20    1.60
   4   6   0   67.09    1.68
   4   6   0   73.12    1.76
   4   6   0   69.89    1.40
   4   6   0   72.12    1.58
   4   6   0   68.54    1.60
   4   6   0   69.26    1.56
  -5  -6   0    2.35    0.34
  -5  -6   0    2.84    0.29
  -5  -6   0    2.53    0.44
  -5  -6   0    3.31    0.36
  -5  -6   0    2.69    0.49
  -5  -6   0    2.50    0.33
  -5  -6   0    3.14    0.39
  -5  -6   0    2.79    0.40
  -5  -6   0    2.70    0.31
  -5  -6   0    3.44    0.54
   5   6   0    3.04    0.48
   5   6   0    3.11    0.39
   5   6   0    3.00    0.50
   5   6   0    3.24    0.38
   5   6   0    3.08    0.38
   5   6   0    2.77    0.30
   5   6   0    2.96    0.51
   5   6   0    3.19    0.35
   5   6   0    2.54    0.29
   5   6   0    2.28    0.38
  -6  -6   0   -0.37    0.24
  -6  -6   0    0.14    0.23
  -6  -6   0    0.17    0.30
  -6  -6   0    0.64    0.43
  -6  -6   0    0.20    0.23
  -6  -6   0    0.85    0.49
  -6  -6   0    1.82    0.53
  -6  -6   0    0.16    0.28
  -6  -6   0    0.09    0.31
  -6  -6   0    0.20    0.20
  -6  -6   0    0.33    0.29
   6   6   0    0.09    0.31
   6   6   0   -0.04    0.23
   6   6   0   -0.30    0.41
   6   6   0    0.19    0.36
   6   6   0    0.88    0.32
   6   6   0    0.12    0.41
   6   6   0    0.24    0.31
   6   6   0    0.74    0.50
   6   6   0    0.12    0.31
  -7  -6   0   20.22    0.63
  -7  -6   0   18.67    1.08
  -7  -6   0   20.78    0.72
  -7  -6   0   20.36    0.62
  -7  -6   0   18.53    0.82
  -7  -6   0   19.47    1.10
  -7  -6   0   20.63    0.63
  -7  -6   0   20.72    0.61
  -7  -6   0   18.69    1.07
  -7  -6   0   19.05    0.82
  -7  -6   0   21.40    0.97
  -7  -6   0   19.07    0.70
  -7  -6   0   19.50    0.79
   7   6   0   20.34    0.81
   7   6   0   18.33    1.13
   7   6   0   19.24    0.83
   7   6   0   21.21    0.76
   7   6   0   20.79    0.78
   7   6   0   21.25    0.98
   7   6   0   21.86    0.89
   7   6   0   19.12    1.03
  -8  -6   0    7.00    0.56
  -8  -6   0    7.16    0.44
  -8  -6   0    6.67    0.77
  -8  -6   0    7.37    0.43
  -8  -6   0    6.59    0.58
  -8  -6   0    6.47    0.48
  -8  -6   0    7.13    0.66
  -8  -6   0    8.86    0.81
  -8  -6   0    8.78    1.02
  -8  -6   0    7.18    0.73
  -8  -6   0    7.87    0.67
  -8  -6   0    7.51    0.47
  -8  -6   0    8.12    0.89
   8   6   0    6.54    0.58
   8   6   0    6.31    0.74
   8   6   0    7.17    0.76
   8   6   0    8.68    0.68
   8   6   0    7.77    0.62
   8   6   0    8.09    0.81
   8   6   0    6.55    0.66
  -9  -6   0    0.55    0.53
  -9  -6   0    0.20    0.36
  -9  -6   0    1.22    0.44
  -9  -6   0    0.28    0.73
  -9  -6   0    0.41    0.42
  -9  -6   0    1.22    0.38
  -9  -6   0    1.19    0.28
  -9  -6   0    0.55    0.65
  -9  -6   0    0.86    0.31
  -9  -6   0    0.67    0.28
  -9  -6   0    0.30    0.65
  -9  -6   0    0.58    0.48
  -9  -6   0    0.61    0.29
   9   6   0    1.02    0.43
   9   6   0    0.23    0.41
   9   6   0    0.74    0.50
   9   6   0    0.98    0.39
   9   6   0    1.88    0.57
   9   6   0    0.54    0.60
 -10  -6   0    3.58    0.38
 -10  -6   0    4.43    0.49
 -10  -6   0    4.24    0.87
 -10  -6   0    4.06    0.60
 -10  -6   0    4.86    0.52
 -10  -6   0    4.18    0.66
 -10  -6   0    4.88    0.61
 -10  -6   0    4.24    0.47
 -10  -6   0    3.71    0.41
 -10  -6   0    4.13    0.47
 -10  -6   0    4.42    0.69
  10   6   0    4.27    0.80
  10   6   0    3.93    0.60
  10   6   0    3.79    0.52
  10   6   0    3.39    0.62
  10   6   0    4.41    0.61
  10   6   0    4.06    0.60
  10   6   0    4.59    0.75
 -11  -6   0    0.79    0.49
 -11  -6   0    0.80    0.33
 -11  -6   0    0.12    0.36
 -11  -6   0    0.35    0.52
 -11  -6   0    0.47    0.64
 -11  -6   0    0.70    0.52
 -11  -6   0    0.95    0.73
 -11  -6   0   -0.36    0.44
 -11  -6   0    0.42    0.65
 -11  -6   0    0.56    0.36
  11   6   0    0.22    0.78
  11   6   0   -0.06    0.46
  11   6   0    0.25    0.56
  11   6   0   -0.06    0.49
  11   6   0    0.20    0.52
  11   6   0    0.47    0.74
 -12  -6   0    1.03    0.60
 -12  -6   0    0.04    0.41
 -12  -6   0    0.87    0.41
 -12  -6   0    0.87    0.60
 -12  -6   0    0.55    0.36
 -12  -6   0    1.15    0.81
 -12  -6   0    0.83    0.50
 -12  -6   0    0.67    0.76
 -12  -6   0    0.52    0.75
  12   6   0    0.41    1.02
  12   6   0    0.67    0.60
  12   6   0    1.02    0.61
  12   6   0    1.69    0.62
  12   6   0    0.22    0.62
 -13  -6   0    1.66    1.01
 -13  -6   0    1.79    0.69
 -13  -6   0    1.31    0.54
 -13  -6   0    2.76    0.91
 -13  -6   0    1.34    0.48
 -13  -6   0    1.74    0.42
 -13  -6   0    1.76    0.68
 -13  -6   0    1.92    0.49
 -13  -6   0    1.67    0.49
  13   6   0    1.06    0.69
  13   6   0    3.30    1.03
  13   6   0    1.60    0.69
  13   6   0    1.86    0.68
  13   6   0    1.93    0.67
 -14  -6   0    0.08    0.73
 -14  -6   0    0.24    0.53
 -14  -6   0   -0.26    0.94
 -14  -6   0   -0.54    0.97
 -14  -6   0    1.02    0.75
  14   6   0   -0.56    0.77
  14   6   0    0.10    1.00
  14   6   0    0.59    0.78
  14   6   0    0.73    0.74
  14   6   0   -0.36    0.72
 -15  -6   0    1.43    1.13
 -15  -6   0    0.97    1.17
 -15  -6   0    0.48    0.86
  15   6   0   -0.06    1.15
  15   6   0    2.35    0.88
  15   6   0    0.45    1.00
 -16  -6   0    0.91    1.37
 -16  -6   0    0.80    1.29
 -16  -6   0    0.03    0.92
  16   6   0    0.64    1.31
  16   6   0    1.19    0.96
 -17  -6   0   -1.39    1.53
  17   6   0    1.99    1.56
  14  -7   0   -0.58    1.41
  14  -7   0    2.07    1.51
  14  -7   0    2.11    1.66
 -14   7   0    1.36    1.60
 -14   7   0   -1.49    1.55
 -14   7   0   -0.84    1.52
  13  -7   0   -0.87    1.22
  13  -7   0   -0.63    1.29
  13  -7   0   -1.49    1.19
  13  -7   0   -0.71    1.48
 -13   7   0   -0.58    1.26
 -13   7   0    2.47    1.34
 -13   7   0   -1.36    1.32
  12  -7   0    2.53    1.36
  12  -7   0   -0.64    1.01
  12  -7   0    0.43    1.17
  12  -7   0    0.67    1.08
 -12   7   0    0.25    1.15
 -12   7   0    0.22    1.18
 -12   7   0    1.15    1.20
  11  -7   0    2.20    1.10
  11  -7   0    2.11    0.97
  11  -7   0    1.00    1.02
  11  -7   0    0.48    1.14
 -11   7   0    1.66    1.12
 -11   7   0    2.22    1.06
 -11   7   0    1.66    1.08
  10  -7   0   -0.53    0.76
  10  -7   0    1.69    0.94
  10  -7   0   -0.77    1.00
  10  -7   0    0.64    1.02
  10  -7   0   -1.32    0.82
  10  -7   0    0.52    0.79
 -10   7   0   -0.97    1.15
 -10   7   0    0.51    0.93
 -10   7   0   -0.57    1.00
 -10   7   0    1.04    0.99
 -10   7   0    0.44    0.92
 -10   7   0    0.71    0.86
   9  -7   0    0.79    0.74
   9  -7   0    0.77    0.85
   9  -7   0    1.23    0.92
   9  -7   0    1.10    0.80
   9  -7   0    1.70    0.79
   9  -7   0   -0.33    0.78
  -9   7   0    2.07    0.98
  -9   7   0    1.43    0.78
  -9   7   0    2.69    0.85
  -9   7   0    0.63    0.79
  -9   7   0    1.03    0.81
  -9   7   0    0.94    0.84
   8  -7   0   27.16    1.52
   8  -7   0   23.66    1.50
   8  -7   0   25.92    1.55
   8  -7   0   25.88    1.61
   8  -7   0   23.97    1.44
   8  -7   0   24.79    1.67
   8  -7   0   23.28    1.60
  -8   7   0   23.04    1.63
  -8   7   0   26.01    1.54
  -8   7   0   21.25    1.55
  -8   7   0   22.05    1.44
  -8   7   0   24.62    1.49
  -8   7   0   21.11    1.61
  -8   7   0   22.88    1.74
  -8   7   0   25.35    1.48
   7  -7   0    0.28    0.68
   7  -7   0    0.61    0.61
   7  -7   0    0.96    0.70
   7  -7   0    0.71    0.80
   7  -7   0    0.74    0.30
   7  -7   0    0.82    0.65
   7  -7   0    0.70    0.67
   7  -7   0    1.35    0.72
   7  -7   0    0.57    0.28
   7  -7   0    0.93    0.72
   7  -7   0    0.92    0.74
  -7   7   0    0.57    0.73
  -7   7   0    0.84    0.64
  -7   7   0    0.83    0.62
  -7   7   0    0.86    0.75
  -7   7   0    1.18    0.69
  -7   7   0   -0.33    0.70
  -7   7   0    0.91    0.70
  -7   7   0    1.59    0.77
  -7   7   0    1.15    0.83
   6  -7   0   15.55    1.25
   6  -7   0   15.00    1.16
   6  -7   0   16.49    1.21
   6  -7   0   17.45    1.13
   6  -7   0   15.97    0.68
   6  -7   0   17.81    1.42
   6  -7   0   15.82    1.93
   6  -7   0   15.44    1.15
   6  -7   0   15.92    1.25
  -6   7   0   17.58    1.17
  -6   7   0   14.10    1.12
  -6   7   0   17.22    1.27
  -6   7   0   17.30    1.30
  -6   7   0   18.30    1.24
  -6   7   0   16.89    1.20
  -6   7   0   15.17    0.67
  -6   7   0   15.70    1.03
  -6   7   0   15.52    1.22
  -6   7   0   16.02    1.26
   5  -7   0    1.34    0.63
   5  -7   0    1.22    0.60
   5  -7   0    1.30    0.72
   5  -7   0    1.06    0.54
   5  -7   0    2.95    0.69
   5  -7   0    1.07    0.36
   5  -7   0    1.93    0.58
   5  -7   0    1.44    0.53
   5  -7   0    0.98    0.64
   5  -7   0    2.09    0.67
  -5   7   0    2.51    0.58
  -5   7   0    0.90    0.55
  -5   7   0    1.88    0.39
  -5   7   0    1.45    0.62
  -5   7   0    1.66    0.49
  -5   7   0    2.61    0.72
  -5   7   0    2.17    0.61
  -5   7   0    1.01    0.53
  -5   7   0    1.10    0.66
   4  -7   0    0.55    0.33
   4  -7   0    0.36    0.54
   4  -7   0    0.17    0.57
   4  -7   0    0.53    0.48
   4  -7   0    1.23    0.52
   4  -7   0    1.25    0.53
   4  -7   0    0.10    0.41
   4  -7   0   -0.20    0.52
   4  -7   0    0.10    0.47
   4  -7   0    0.60    0.49
  -4   7   0    0.21    0.66
  -4   7   0    0.40    0.50
  -4   7   0    0.07    0.47
  -4   7   0    0.18    0.48
  -4   7   0    0.26    0.42
  -4   7   0    0.35    0.48
  -4   7   0   -0.14    0.55
  -4   7   0    0.44    0.52
  -4   7   0    0.29    0.39
  -4   7   0   -0.20    0.32
   3  -7   0   17.33    0.96
   3  -7   0   18.02    0.99
   3  -7   0   17.79    0.78
   3  -7   0   17.27    1.05
   3  -7   0   16.55    1.03
   3  -7   0   17.99    0.98
   3  -7   0   18.33    0.80
   3  -7   0   16.03    0.97
  -3   7   0   15.79    0.93
  -3   7   0   15.32    1.15
  -3   7   0   17.06    0.79
  -3   7   0   17.40    0.77
  -3   7   0   16.58    0.94
  -3   7   0   16.63    1.00
  -3   7   0   17.89    0.96
  -3   7   0   20.56    1.35
   2  -7   0   22.01    1.04
   2  -7   0   21.05    0.85
   2  -7   0   18.36    0.97
   2  -7   0   22.95    1.10
   2  -7   0   20.13    1.07
   2  -7   0   22.96    1.02
   2  -7   0   21.03    0.97
   2  -7   0   21.80    0.76
   2  -7   0   21.54    1.00
  -2   7   0   20.96    0.99
  -2   7   0   20.51    0.97
  -2   7   0   20.15    0.73
  -2   7   0   20.75    0.84
  -2   7   0   21.21    0.97
  -2   7   0   19.90    1.71
  -2   7   0   19.00    1.11
  -2   7   0   22.88    1.04
  -2   7   0   20.37    1.01
  -2   7   0   18.37    1.19
   1  -7   0    1.22    0.45
   1  -7   0    0.64    0.42
   1  -7   0    1.32    0.46
   1  -7   0    0.98    0.41
   1  -7   0    1.48    0.49
   1  -7   0    1.09    0.43
   1  -7   0    1.13    0.49
   1  -7   0    1.22    0.37
   1  -7   0    0.53    0.43
  -1   7   0    0.50    0.42
  -1   7   0    0.32    0.39
  -1   7   0    1.18    0.45
  -1   7   0    1.76    0.45
  -1   7   0    1.02    0.36
  -1   7   0    0.96    0.45
  -1   7   0    0.95    0.26
  -1   7   0    1.00    0.45
  -1   7   0    0.94    0.39
  -1   7   0    0.81    0.25
  -1   7   0    2.07    0.48
   0  -7   0   13.66    0.75
   0  -7   0   13.51    0.83
   0  -7   0   12.88    0.77
   0  -7   0   13.70    0.80
   0  -7   0   13.45    0.78
   0  -7   0   14.43    0.83
   0  -7   0   12.55    0.79
   0  -7   0   13.75    0.85
   0  -7   0   13.17    0.76
   0   7   0   13.04    0.80
   0   7   0   13.98    0.80
   0   7   0   13.18    0.73
   0   7   0   13.45    0.78
   0   7   0   15.06    0.81
   0   7   0   13.45    0.42
   0   7   0   13.04    0.78
   0   7   0   12.54    0.82
   0   7   0   13.05    0.43
   0   7   0   13.39    0.81
  -1  -7   0   15.46    0.75
  -1  -7   0   15.37    0.78
  -1  -7   0   14.71    0.77
  -1  -7   0   14.32    0.83
  -1  -7   0   14.31    0.75
  -1  -7   0   15.10    0.78
  -1  -7   0   14.25    0.80
  -1  -7   0   14.94    0.76
  -1  -7   0   14.61    0.80
   1   7   0   14.81    0.76
   1   7   0   13.63    0.78
   1   7   0   15.17    0.79
   1   7   0   16.06    0.84
   1   7   0   15.60    0.80
   1   7   0   15.32    0.84
   1   7   0   15.51    0.76
   1   7   0   14.68    0.78
   1   7   0   16.88    0.81
  -2  -7   0    0.78    0.39
  -2  -7   0    0.82    0.43
  -2  -7   0    0.85    0.34
  -2  -7   0    0.38    0.37
  -2  -7   0    0.42    0.34
  -2  -7   0    0.35    0.39
  -2  -7   0    0.95    0.37
  -2  -7   0    0.38    0.31
   2   7   0    0.34    0.40
   2   7   0    0.26    0.41
   2   7   0   -0.26    0.32
   2   7   0    0.26    0.33
   2   7   0    0.59    0.39
   2   7   0    0.44    0.35
   2   7   0    0.17    0.38
   2   7   0    0.34    0.34
  -3  -7   0   74.32    1.83
  -3  -7   0   75.37    1.65
  -3  -7   0   75.53    1.71
  -3  -7   0   76.17    1.77
  -3  -7   0   76.63    1.83
  -3  -7   0   73.82    1.82
  -3  -7   0   75.83    1.71
  -3  -7   0   73.86    1.65
  -3  -7   0   70.10    1.81
  -3  -7   0   71.30    1.75
   3   7   0   75.27    1.84
   3   7   0   75.97    1.66
   3   7   0   73.49    1.75
   3   7   0   75.77    1.73
   3   7   0   73.28    1.65
   3   7   0   73.11    1.82
   3   7   0   74.34    1.73
  -4  -7   0    0.07    0.35
  -4  -7   0    0.13    0.30
  -4  -7   0   -0.11    0.40
  -4  -7   0   -0.13    0.17
  -4  -7   0   -0.34    0.40
  -4  -7   0    0.42    0.41
  -4  -7   0    0.02    0.28
  -4  -7   0    0.22    0.40
  -4  -7   0    0.10    0.31
  -4  -7   0    0.13    0.32
  -4  -7   0    0.33    0.32
   4   7   0    0.10    0.30
   4   7   0    0.18    0.31
   4   7   0    0.55    0.30
   4   7   0   -0.38    0.28
   4   7   0    0.19    0.32
   4   7   0    0.42    0.44
   4   7   0    0.10    0.19
   4   7   0    0.14    0.28
   4   7   0    0.19    0.40
  -5  -7   0   76.14    1.57
  -5  -7   0   80.44    1.93
  -5  -7   0   79.88    1.99
  -5  -7   0   74.73    2.07
  -5  -7   0   77.24    1.62
  -5  -7   0   73.68    1.86
  -5  -7   0   77.85    1.70
  -5  -7   0   78.19    1.77
  -5  -7   0   74.77    1.96
  -5  -7   0   77.29    1.62
  -5  -7   0   74.76    1.68
   5   7   0   72.86    1.76
   5   7   0   71.86    1.76
   5   7   0   81.72    2.02
   5   7   0   76.07    1.73
   5   7   0   78.09    1.77
   5   7   0   77.40    1.74
   5   7   0   75.94    1.62
   5   7   0   77.63    1.57
   5   7   0   75.39    1.92
  -6  -7   0    6.65    0.55
  -6  -7   0    6.28    0.52
  -6  -7   0    6.01    0.47
  -6  -7   0    7.30    0.77
  -6  -7   0    6.41    0.45
  -6  -7   0    7.22    0.76
  -6  -7   0    5.61    0.59
  -6  -7   0    6.83    0.58
  -6  -7   0    6.88    0.79
  -6  -7   0    5.74    0.54
   6   7   0    6.38    0.57
   6   7   0    7.16    0.58
   6   7   0    5.07    0.67
   6   7   0    4.54    0.63
   6   7   0    7.17    0.56
   6   7   0    5.64    0.72
   6   7   0    6.45    0.59
   6   7   0    5.85    0.48
   6   7   0    7.71    0.48
   6   7   0    5.47    0.60
  -7  -7   0    1.59    0.36
  -7  -7   0    1.10    0.40
  -7  -7   0    1.02    0.58
  -7  -7   0    1.24    0.37
  -7  -7   0    0.96    0.60
  -7  -7   0    1.09    0.29
  -7  -7   0    1.35    0.35
  -7  -7   0    1.70    0.31
  -7  -7   0    0.78    0.50
  -7  -7   0    1.41    0.27
   7   7   0    1.71    0.59
   7   7   0    0.97    0.40
   7   7   0    1.47    0.51
   7   7   0   -0.11    0.59
   7   7   0    1.21    0.38
   7   7   0    1.57    0.39
   7   7   0    1.62    0.29
   7   7   0    1.22    0.39
   7   7   0    1.35    0.37
  -8  -7   0    4.74    0.43
  -8  -7   0    3.50    0.69
  -8  -7   0    4.35    0.62
  -8  -7   0    3.90    0.52
  -8  -7   0    3.85    0.45
  -8  -7   0    2.15    0.72
  -8  -7   0    3.96    0.46
  -8  -7   0    3.98    0.43
  -8  -7   0    3.83    0.46
  -8  -7   0    4.44    0.40
  -8  -7   0    4.24    0.63
  -8  -7   0    4.48    0.52
  -8  -7   0    5.57    0.89
   8   7   0    3.85    0.66
   8   7   0    3.87    0.51
   8   7   0    4.20    0.58
   8   7   0    5.04    0.67
   8   7   0    5.15    0.59
   8   7   0    3.67    0.51
   8   7   0    3.99    0.53
  -9  -7   0    2.72    0.34
  -9  -7   0    1.55    0.78
  -9  -7   0    2.46    0.49
  -9  -7   0    2.18    0.43
  -9  -7   0    2.54    0.73
  -9  -7   0    1.96    0.32
  -9  -7   0    2.13    0.49
  -9  -7   0    2.34    0.31
  -9  -7   0    1.97    0.30
  -9  -7   0    1.92    0.53
  -9  -7   0    2.41    0.42
  -9  -7   0    1.60    0.75
  -9  -7   0    2.50    0.65
   9   7   0    2.60    0.46
   9   7   0    2.53    0.59
   9   7   0    2.12    0.46
   9   7   0    2.12    0.60
   9   7   0    1.87    0.50
   9   7   0    1.46    0.65
 -10  -7   0    0.90    0.33
 -10  -7   0    1.23    0.70
 -10  -7   0    0.67    0.41
 -10  -7   0    1.47    0.49
 -10  -7   0    0.97    0.56
 -10  -7   0    0.73    0.29
 -10  -7   0   -0.08    0.68
 -10  -7   0    1.11    0.31
 -10  -7   0    1.18    0.31
 -10  -7   0    0.20    0.47
  10   7   0    1.25    0.47
  10   7   0    0.95    0.48
  10   7   0    0.76    0.50
  10   7   0    0.56    0.70
  10   7   0    0.97    0.57
  10   7   0    2.22    0.72
 -11  -7   0    0.65    0.30
 -11  -7   0    1.06    0.53
 -11  -7   0    0.22    0.35
 -11  -7   0   -0.40    0.82
 -11  -7   0   -0.47    0.73
 -11  -7   0    0.64    0.44
 -11  -7   0    0.42    0.35
 -11  -7   0    0.62    0.65
 -11  -7   0    1.13    0.34
 -11  -7   0    0.43    0.54
  11   7   0    0.78    0.54
  11   7   0   -0.19    0.76
  11   7   0    0.55    0.79
  11   7   0    1.51    0.53
  11   7   0   -0.19    0.57
  11   7   0    0.06    0.51
 -12  -7   0    1.27    0.82
 -12  -7   0   -0.18    0.31
 -12  -7   0    0.44    0.82
 -12  -7   0   -0.01    0.37
 -12  -7   0    0.47    0.58
 -12  -7   0   -0.49    0.36
 -12  -7   0    1.70    0.76
 -12  -7   0   -0.13    0.35
 -12  -7   0   -0.27    0.59
 -12  -7   0    0.86    0.47
  12   7   0   -0.20    0.64
  12   7   0   -0.02    0.57
  12   7   0   -0.87    0.52
  12   7   0    0.24    0.56
  12   7   0   -2.10    0.79
 -13  -7   0    3.55    0.96
 -13  -7   0    2.49    0.45
 -13  -7   0    1.79    0.70
 -13  -7   0    2.08    0.43
 -13  -7   0    2.37    0.37
 -13  -7   0    2.84    0.74
 -13  -7   0    0.95    0.41
 -13  -7   0    1.90    1.00
 -13  -7   0    1.57    0.91
  13   7   0    2.11    0.79
  13   7   0    4.27    1.06
  13   7   0    2.50    0.71
  13   7   0    2.28    0.79
  13   7   0    2.78    0.69
 -14  -7   0    1.02    0.97
 -14  -7   0   -1.68    1.05
 -14  -7   0   -0.51    0.72
 -14  -7   0   -0.38    0.77
  14   7   0    1.61    1.12
  14   7   0    0.64    0.73
  14   7   0    2.43    0.76
  14   7   0   -0.08    0.78
  14   7   0    1.01    0.80
 -15  -7   0   -0.02    0.85
 -15  -7   0    0.09    1.14
 -15  -7   0   -0.95    1.14
  15   7   0   -0.67    0.86
  15   7   0    0.51    1.22
  15   7   0    0.20    0.83
 -16  -7   0    0.52    1.41
 -16  -7   0    0.72    1.34
 -16  -7   0    0.27    0.97
  16   7   0    2.79    1.38
  16   7   0   -1.46    0.94
  13  -8   0   -0.16    1.55
  13  -8   0    0.85    1.67
  13  -8   0    0.25    1.29
 -13   8   0   -1.05    1.42
 -13   8   0    0.27    1.56
 -13   8   0    1.58    1.48
  12  -8   0    0.67    1.13
  12  -8   0    2.13    1.16
  12  -8   0    1.99    1.45
  12  -8   0    1.73    1.23
 -12   8   0    0.87    1.24
 -12   8   0    0.12    1.34
 -12   8   0   -0.63    1.24
  11  -8   0    1.57    1.25
  11  -8   0   -0.63    1.04
  11  -8   0   -0.46    1.15
  11  -8   0   -0.86    1.14
 -11   8   0   -0.55    1.10
 -11   8   0    3.55    1.13
 -11   8   0    0.80    1.30
  10  -8   0    1.98    0.98
  10  -8   0    1.80    1.01
  10  -8   0    0.04    0.87
  10  -8   0    1.62    1.13
 -10   8   0    1.07    0.97
 -10   8   0    0.08    1.01
 -10   8   0    0.62    1.21
 -10   8   0    1.13    1.01
   9  -8   0    0.73    0.83
   9  -8   0    0.30    1.03
   9  -8   0    1.43    1.02
   9  -8   0    1.18    0.84
   9  -8   0    0.98    1.06
   9  -8   0   -0.72    0.87
  -9   8   0   -0.66    0.77
  -9   8   0    1.32    0.85
  -9   8   0    0.47    0.91
  -9   8   0    0.91    0.91
  -9   8   0    1.77    0.86
  -9   8   0    0.59    1.21
   8  -8   0    4.45    0.48
   8  -8   0    4.11    0.44
   8  -8   0    4.48    1.29
   8  -8   0    5.03    0.91
   8  -8   0    5.18    0.91
   8  -8   0    6.22    1.00
   8  -8   0    4.17    0.95
   8  -8   0    4.81    1.02
  -8   8   0    4.24    0.87
  -8   8   0    4.34    0.95
  -8   8   0    3.72    1.27
  -8   8   0    4.01    0.88
  -8   8   0    4.20    0.95
  -8   8   0    3.11    0.93
   7  -8   0    4.21    0.80
   7  -8   0    3.29    0.58
   7  -8   0    4.83    0.88
   7  -8   0    3.79    0.84
   7  -8   0    2.60    0.80
   7  -8   0    4.77    0.83
   7  -8   0    3.39    0.44
   7  -8   0    4.64    0.84
   7  -8   0    3.21    0.91
   7  -8   0    5.56    1.14
  -7   8   0    2.69    0.90
  -7   8   0    4.46    0.92
  -7   8   0    2.78    0.81
  -7   8   0    3.94    0.94
  -7   8   0    4.28    0.76
  -7   8   0    2.05    0.84
  -7   8   0    3.68    0.92
  -7   8   0    3.61    0.89
  -7   8   0    2.91    0.93
   6  -8   0    5.26    1.06
   6  -8   0    4.02    0.84
   6  -8   0    4.03    0.85
   6  -8   0    4.15    0.74
   6  -8   0    3.43    0.98
   6  -8   0    4.40    0.52
   6  -8   0    4.82    0.80
   6  -8   0    2.98    0.77
   6  -8   0    3.84    0.75
   6  -8   0    2.22    0.72
  -6   8   0    4.36    0.82
  -6   8   0    4.64    0.86
  -6   8   0    5.21    0.97
  -6   8   0    3.99    0.78
  -6   8   0    5.17    0.94
  -6   8   0    5.12    0.70
  -6   8   0    3.86    0.81
  -6   8   0    3.71    0.47
  -6   8   0    4.10    0.79
  -6   8   0    2.46    0.75
   5  -8   0    8.55    0.70
   5  -8   0    7.65    0.95
   5  -8   0    9.02    0.88
   5  -8   0    8.74    1.02
   5  -8   0    7.94    1.09
   5  -8   0    8.63    1.17
   5  -8   0    8.91    1.01
   5  -8   0    9.19    1.10
   5  -8   0    8.96    1.05
   5  -8   0    8.04    0.90
  -5   8   0    7.92    0.68
  -5   8   0    8.78    1.03
  -5   8   0    8.19    1.10
  -5   8   0    7.63    0.93
  -5   8   0    9.03    0.85
  -5   8   0    8.49    1.03
  -5   8   0    8.31    1.00
  -5   8   0    7.39    0.81
  -5   8   0    8.53    1.11
  -5   8   0    7.88    0.95
  -5   8   0    7.14    0.88
   4  -8   0    8.99    0.92
   4  -8   0    9.40    0.83
   4  -8   0    9.77    1.07
   4  -8   0    9.97    0.71
   4  -8   0    9.03    0.96
   4  -8   0    8.79    0.98
   4  -8   0    8.01    1.00
   4  -8   0   10.02    1.10
   4  -8   0   11.60    1.40
   4  -8   0    9.02    0.91
  -4   8   0    9.14    1.03
  -4   8   0    8.25    0.93
  -4   8   0    8.88    0.96
  -4   8   0    8.05    0.90
  -4   8   0    8.27    0.96
  -4   8   0    8.03    0.68
  -4   8   0    8.67    1.05
  -4   8   0    9.08    0.80
  -4   8   0    9.20    1.05
  -4   8   0    8.25    0.75
  -4   8   0    7.48    1.00
   3  -8   0    1.45    0.51
   3  -8   0    1.41    0.42
   3  -8   0    0.62    0.50
   3  -8   0    0.81    0.69
   3  -8   0    1.15    0.62
   3  -8   0    0.86    0.54
   3  -8   0    0.93    0.40
   3  -8   0    0.56    1.03
   3  -8   0    0.67    0.52
   3  -8   0    2.54    0.89
  -3   8   0    1.22    0.55
  -3   8   0    1.53    0.39
  -3   8   0    2.05    0.55
  -3   8   0    0.91    0.53
  -3   8   0    0.61    0.51
  -3   8   0    0.98    0.59
  -3   8   0    1.63    0.59
  -3   8   0    1.00    0.41
  -3   8   0    1.19    0.73
  -3   8   0    1.11    0.59
  -3   8   0    1.54    0.41
   2  -8   0    0.42    0.48
   2  -8   0    1.23    0.50
   2  -8   0    0.82    0.48
   2  -8   0    0.48    0.40
   2  -8   0    0.45    0.49
   2  -8   0    1.69    0.96
   2  -8   0    0.38    0.50
   2  -8   0    1.11    0.48
  -2   8   0    0.20    0.52
  -2   8   0    0.41    0.36
  -2   8   0    0.45    0.46
  -2   8   0    0.70    0.47
  -2   8   0    0.93    0.48
  -2   8   0    0.55    0.45
  -2   8   0    0.04    0.45
  -2   8   0    0.49    0.31
  -2   8   0    0.98    0.46
  -2   8   0    1.22    0.42
  -2   8   0    0.22    0.52
   1  -8   0   84.89    1.95
   1  -8   0   80.50    2.02
   1  -8   0   79.81    2.09
   1  -8   0   76.56    2.01
   1  -8   0   84.46    2.12
   1  -8   0   82.42    2.03
   1  -8   0   81.77    2.00
  -1   8   0   82.76    2.05
  -1   8   0   81.42    2.12
  -1   8   0   83.23    1.66
  -1   8   0   84.04    2.02
  -1   8   0   78.93    2.11
  -1   8   0   82.02    1.65
  -1   8   0   79.08    1.93
  -1   8   0   83.18    2.05
  -1   8   0   81.66    2.10
   0  -8   0   17.79    0.92
   0  -8   0   19.40    0.93
   0  -8   0   18.71    0.99
   0  -8   0   16.30    0.90
   0  -8   0   19.66    0.99
   0  -8   0   17.71    0.95
   0  -8   0   16.98    0.98
   0  -8   0   17.84    0.90
   0  -8   0   15.70    0.91
   0   8   0   18.51    0.95
   0   8   0   18.58    0.93
   0   8   0   17.65    1.01
   0   8   0   18.47    0.51
   0   8   0   18.82    0.95
   0   8   0   18.23    0.51
   0   8   0   19.13    0.98
   0   8   0   19.05    0.98
   0   8   0   17.49    0.92
   0   8   0   16.76    0.93
   0   8   0   17.87    0.90
  -1  -8   0    8.87    0.77
  -1  -8   0   10.37    0.79
  -1  -8   0    9.59    0.80
  -1  -8   0    9.85    0.76
  -1  -8   0   10.07    0.75
  -1  -8   0    8.35    0.72
  -1  -8   0    9.87    0.75
  -1  -8   0    7.90    0.71
  -1  -8   0   10.58    0.82
   1   8   0    9.41    0.77
   1   8   0    9.89    0.72
   1   8   0    8.23    0.76
   1   8   0   10.39    0.79
   1   8   0    7.93    0.76
   1   8   0    9.09    0.73
   1   8   0    8.94    0.74
   1   8   0    9.11    0.78
   1   8   0    9.00    0.72
  -2  -8   0    2.90    0.44
  -2  -8   0    3.72    0.52
  -2  -8   0    3.22    0.47
  -2  -8   0    3.99    0.50
  -2  -8   0    3.26    0.54
  -2  -8   0    3.66    0.52
  -2  -8   0    4.34    0.60
  -2  -8   0    3.18    0.49
  -2  -8   0    4.26    0.56
   2   8   0    3.78    0.52
   2   8   0    3.52    0.53
   2   8   0    4.11    0.51
   2   8   0    3.24    0.49
   2   8   0    4.15    0.59
   2   8   0    4.11    0.50
   2   8   0    5.12    0.62
   2   8   0    3.69    0.54
  -3  -8   0    8.39    0.79
  -3  -8   0    7.37    0.70
  -3  -8   0    8.33    0.68
  -3  -8   0    8.65    0.78
  -3  -8   0    9.14    0.71
  -3  -8   0    8.44    0.67
  -3  -8   0    8.71    0.69
  -3  -8   0    8.39    0.76
  -3  -8   0    7.66    0.75
  -3  -8   0    8.16    0.63
   3   8   0    7.89    0.63
   3   8   0    8.29    0.80
   3   8   0    7.86    0.64
   3   8   0    8.95    0.69
   3   8   0    8.17    0.69
   3   8   0    7.28    0.77
   3   8   0    8.76    0.64
  -4  -8   0    1.97    0.55
  -4  -8   0    1.55    0.39
  -4  -8   0    1.18    0.18
  -4  -8   0    1.46    0.42
  -4  -8   0    1.90    0.43
  -4  -8   0    1.06    0.51
  -4  -8   0    2.15    0.24
  -4  -8   0    2.02    0.42
  -4  -8   0    1.73    0.47
  -4  -8   0    1.76    0.37
  -4  -8   0    1.12    0.52
   4   8   0    1.19    0.55
   4   8   0    1.66    0.38
   4   8   0    1.71    0.39
   4   8   0    1.14    0.36
   4   8   0    1.50    0.36
   4   8   0    1.78    0.41
   4   8   0    1.45    0.37
   4   8   0    0.98    0.47
  -5  -8   0   16.38    0.82
  -5  -8   0   16.46    0.76
  -5  -8   0   16.89    0.71
  -5  -8   0   16.78    0.76
  -5  -8   0   16.55    0.99
  -5  -8   0   16.30    0.98
  -5  -8   0   18.23    1.02
  -5  -8   0   15.78    0.82
  -5  -8   0   17.03    1.03
  -5  -8   0   16.48    0.73
  -5  -8   0   15.31    0.54
   5   8   0   18.00    0.83
   5   8   0   15.95    0.70
   5   8   0   16.57    0.57
   5   8   0   17.49    0.98
   5   8   0   15.86    0.84
   5   8   0   16.48    0.77
   5   8   0   16.96    0.70
   5   8   0   15.93    0.80
   5   8   0   15.24    1.02
  -6  -8   0    2.00    0.37
  -6  -8   0    1.53    0.38
  -6  -8   0    1.90    0.56
  -6  -8   0    2.23    0.44
  -6  -8   0    2.48    0.38
  -6  -8   0    2.23    0.57
  -6  -8   0    1.86    0.34
  -6  -8   0    2.58    0.41
  -6  -8   0    2.58    0.68
  -6  -8   0    1.94    0.44
  -6  -8   0    1.45    0.55
   6   8   0    2.51    0.45
   6   8   0    2.11    0.59
   6   8   0    2.01    0.42
   6   8   0    2.15    0.36
   6   8   0    2.51    0.38
   6   8   0    1.77    0.42
   6   8   0    1.51    0.52
   6   8   0    2.44    0.35
   6   8   0    2.21    0.43
  -7  -8   0   -0.15    0.27
  -7  -8   0   -0.03    0.30
  -7  -8   0    0.90    0.69
  -7  -8   0   -0.06    0.33
  -7  -8   0    0.63    0.54
  -7  -8   0   -0.82    0.51
  -7  -8   0    0.61    0.40
  -7  -8   0    0.19    0.35
  -7  -8   0    0.01    0.36
  -7  -8   0   -0.37    0.26
  -7  -8   0   -0.25    0.35
   7   8   0   -0.09    0.41
   7   8   0   -0.03    0.38
   7   8   0    0.54    0.67
   7   8   0    0.16    0.54
   7   8   0   -0.12    0.28
   7   8   0    0.43    0.36
   7   8   0   -0.26    0.36
   7   8   0    0.13    0.36
   7   8   0   -0.10    0.51
  -8  -8   0    1.81    0.44
  -8  -8   0    4.15    0.83
  -8  -8   0    2.31    0.69
  -8  -8   0    1.82    0.31
  -8  -8   0    2.50    0.36
  -8  -8   0    1.85    0.48
  -8  -8   0    2.26    0.34
  -8  -8   0    3.45    0.45
  -8  -8   0    2.20    0.35
  -8  -8   0    2.98    0.71
  -8  -8   0    1.71    0.40
   8   8   0    1.79    0.68
   8   8   0    2.23    0.47
   8   8   0    2.37    0.79
   8   8   0    1.97    0.49
   8   8   0    2.46    0.62
   8   8   0    1.63    0.48
  -9  -8   0    1.38    0.48
  -9  -8   0    1.52    0.33
  -9  -8   0    0.94    0.63
  -9  -8   0    0.28    0.79
  -9  -8   0    2.12    0.73
  -9  -8   0    1.30    0.40
  -9  -8   0    1.49    0.34
  -9  -8   0    1.87    0.43
  -9  -8   0    1.83    0.50
  -9  -8   0    1.11    0.32
  -9  -8   0    1.82    0.30
  -9  -8   0    0.50    0.48
   9   8   0    0.83    0.47
   9   8   0    1.00    0.54
   9   8   0    1.59    0.64
   9   8   0    1.11    0.49
   9   8   0    1.73    0.47
   9   8   0    1.02    0.68
   9   8   0    1.48    0.58
 -10  -8   0    0.10    0.30
 -10  -8   0   -0.08    0.45
 -10  -8   0   -0.61    0.40
 -10  -8   0    0.17    0.31
 -10  -8   0    0.38    0.28
 -10  -8   0    0.57    0.33
 -10  -8   0    0.03    0.69
 -10  -8   0   -0.41    0.53
 -10  -8   0    0.05    0.47
  10   8   0   -0.33    0.62
  10   8   0   -0.02    0.66
  10   8   0   -0.13    0.46
  10   8   0   -0.03    0.50
  10   8   0    0.34    0.50
  10   8   0   -0.01    0.60
 -11  -8   0    0.59    0.63
 -11  -8   0    0.26    0.33
 -11  -8   0    0.23    0.30
 -11  -8   0    0.15    0.35
 -11  -8   0    0.33    0.52
 -11  -8   0   -0.01    0.45
 -11  -8   0    1.28    0.82
 -11  -8   0    0.43    0.27
  11   8   0    0.12    0.65
  11   8   0    0.68    0.53
  11   8   0    0.91    0.73
  11   8   0    0.51    0.55
 -12  -8   0    2.46    0.92
 -12  -8   0    3.21    0.83
 -12  -8   0    2.78    0.69
 -12  -8   0    1.81    0.88
 -12  -8   0    2.13    0.64
  12   8   0    2.74    0.94
  12   8   0    2.51    0.64
  12   8   0    2.94    0.68
  12   8   0    3.24    0.81
  12   8   0    2.99    0.69
 -13  -8   0   -0.76    0.86
 -13  -8   0    0.25    0.65
 -13  -8   0   -0.44    0.68
 -13  -8   0    0.11    1.07
  13   8   0    0.26    0.78
  13   8   0    0.40    0.66
  13   8   0    0.21    0.66
  13   8   0   -0.29    0.71
  13   8   0   -0.79    0.96
 -14  -8   0    0.46    0.77
 -14  -8   0    1.57    1.02
 -14  -8   0    0.99    0.81
 -14  -8   0    1.07    1.11
  14   8   0    1.15    0.79
  14   8   0    1.55    0.89
  14   8   0    0.58    1.11
  14   8   0    2.53    0.89
 -15  -8   0    0.02    1.14
 -15  -8   0    1.36    1.30
 -15  -8   0   -0.08    0.84
  15   8   0    0.21    0.81
  15   8   0    1.07    0.98
  15   8   0    0.36    1.28
 -16  -8   0    2.39    1.44
 -16  -8   0   -1.17    0.97
 -16  -8   0    0.60    1.34
  16   8   0    0.98    0.98
  16   8   0    0.62    1.42
  13  -9   0   -1.83    1.35
  13  -9   0    5.19    1.77
  13  -9   0    0.55    1.74
 -13   9   0    0.96    1.60
 -13   9   0    2.59    1.71
 -13   9   0    2.61    1.65
  12  -9   0   -0.28    1.23
  12  -9   0    0.10    1.57
  12  -9   0   -1.78    1.47
 -12   9   0    1.80    1.44
 -12   9   0    0.93    1.36
 -12   9   0    2.08    1.45
  11  -9   0    0.66    1.33
  11  -9   0    0.61    1.15
  11  -9   0   -0.22    1.28
  11  -9   0   -1.11    1.25
 -11   9   0    0.16    1.15
 -11   9   0    3.11    1.28
 -11   9   0    0.78    1.28
  10  -9   0   -0.12    1.02
  10  -9   0   -0.56    0.98
  10  -9   0    0.76    1.20
  10  -9   0   -0.27    1.14
 -10   9   0   -0.86    1.04
 -10   9   0   -0.67    1.08
 -10   9   0    0.16    1.03
   9  -9   0    0.92    1.07
   9  -9   0   -0.23    0.99
   9  -9   0   -0.20    0.88
   9  -9   0   -0.68    1.31
   9  -9   0    0.35    1.00
  -9   9   0    0.17    1.10
  -9   9   0   -0.33    1.11
  -9   9   0   -0.26    1.01
  -9   9   0    1.53    0.97
  -9   9   0    1.87    1.06
   8  -9   0    0.94    0.98
   8  -9   0    0.97    0.88
   8  -9   0   -1.14    1.10
   8  -9   0    0.28    0.80
   8  -9   0   -0.65    0.40
   8  -9   0    2.05    0.92
   8  -9   0    0.26    0.39
  -8   9   0   -0.03    1.02
  -8   9   0   -0.06    0.87
  -8   9   0    1.32    0.80
  -8   9   0    0.87    0.93
  -8   9   0    0.11    0.93
  -8   9   0   -0.43    0.86
   7  -9   0    1.60    0.80
   7  -9   0    0.05    0.94
   7  -9   0   -0.51    0.82
   7  -9   0   -0.29    0.90
   7  -9   0   -0.08    0.86
   7  -9   0    0.49    0.81
   7  -9   0    1.10    0.48
   7  -9   0    0.22    0.73
   7  -9   0    0.21    0.79
  -7   9   0    0.17    0.67
  -7   9   0    0.82    0.74
  -7   9   0    0.81    0.96
  -7   9   0    2.43    0.82
  -7   9   0    0.97    0.95
  -7   9   0    0.00    0.89
  -7   9   0    1.34    0.82
  -7   9   0    0.78    0.44
  -7   9   0    0.90    0.84
   6  -9   0   -0.53    0.69
   6  -9   0   -0.67    0.68
   6  -9   0    1.17    0.73
   6  -9   0    1.12    0.80
   6  -9   0   -0.36    0.45
   6  -9   0    1.17    0.84
   6  -9   0   -0.14    0.68
   6  -9   0    0.77    0.74
   6  -9   0   -0.31    0.84
  -6   9   0    0.92    0.68
  -6   9   0   -0.80    0.77
  -6   9   0   -0.07    0.43
  -6   9   0    0.19    0.60
  -6   9   0   -0.05    0.99
  -6   9   0    1.20    0.70
  -6   9   0    0.18    0.87
  -6   9   0   -0.38    0.74
  -6   9   0   -0.98    1.34
  -6   9   0   -0.15    0.72
  -6   9   0    1.22    0.77
   5  -9   0    0.12    0.75
   5  -9   0    0.51    0.75
   5  -9   0    0.41    0.47
   5  -9   0   -0.79    0.60
   5  -9   0   -0.05    0.65
   5  -9   0    0.89    0.62
   5  -9   0    0.21    1.21
   5  -9   0    0.57    0.64
  -5   9   0    1.17    0.74
  -5   9   0    1.26    0.75
  -5   9   0    1.01    0.45
  -5   9   0    0.48    0.62
  -5   9   0    0.22    0.79
  -5   9   0    1.20    1.10
  -5   9   0    0.22    0.65
  -5   9   0    0.68    0.70
  -5   9   0   -0.50    0.70
  -5   9   0    0.15    0.51
  -5   9   0    0.21    0.59
   4  -9   0    3.91    0.85
   4  -9   0    2.75    0.69
   4  -9   0    5.36    1.01
   4  -9   0    1.82    0.80
   4  -9   0    4.76    1.19
   4  -9   0    2.88    0.70
   4  -9   0    2.64    0.55
   4  -9   0    4.02    0.72
   4  -9   0    3.36    0.71
  -4   9   0    4.49    0.85
  -4   9   0    3.04    0.76
  -4   9   0    3.12    0.52
  -4   9   0    2.71    0.67
  -4   9   0    3.54    0.76
  -4   9   0    3.97    0.73
  -4   9   0    4.10    0.82
  -4   9   0    2.45    0.54
  -4   9   0    3.30    0.66
  -4   9   0    3.43    0.69
  -4   9   0    2.79    0.58
   3  -9   0    4.44    0.95
   3  -9   0    2.54    0.66
   3  -9   0    2.38    0.58
   3  -9   0    1.56    0.58
   3  -9   0    2.66    0.73
   3  -9   0    2.60    0.53
   3  -9   0    1.62    0.61
   3  -9   0    2.86    0.66
   3  -9   0    2.35    0.64
  -3   9   0    2.23    0.74
  -3   9   0    1.54    0.57
  -3   9   0    2.77    0.63
  -3   9   0    1.65    0.61
  -3   9   0    1.59    0.59
  -3   9   0    2.29    0.69
  -3   9   0    2.54    0.49
  -3   9   0    1.88    0.58
  -3   9   0    2.58    0.49
  -3   9   0    1.28    0.51
  -3   9   0    1.94    0.45
   2  -9   0   12.50    0.87
   2  -9   0   12.19    1.07
   2  -9   0   12.65    1.09
   2  -9   0   10.33    0.94
   2  -9   0   13.49    1.02
   2  -9   0   11.05    0.98
   2  -9   0   11.42    1.00
   2  -9   0   12.66    0.96
   2  -9   0   12.87    1.07
  -2   9   0   12.09    1.03
  -2   9   0   12.58    1.04
  -2   9   0   11.98    0.93
  -2   9   0   11.87    0.68
  -2   9   0   17.03    1.46
  -2   9   0   10.78    1.00
  -2   9   0   13.23    1.01
  -2   9   0   11.94    0.84
   1  -9   0    1.69    0.60
   1  -9   0    2.36    0.58
   1  -9   0    0.96    0.47
   1  -9   0    2.10    0.60
   1  -9   0    2.02    0.49
   1  -9   0    2.47    0.56
   1  -9   0    1.25    0.54
   1  -9   0    1.48    0.48
   1  -9   0    1.19    0.56
  -1   9   0    1.34    0.31
  -1   9   0    2.46    0.65
  -1   9   0    1.44    0.48
  -1   9   0    1.40    0.56
  -1   9   0    0.95    0.52
  -1   9   0    2.46    0.58
  -1   9   0    2.19    0.56
  -1   9   0    1.84    0.51
  -1   9   0    1.44    0.58
  -1   9   0    1.34    0.52
  -1   9   0    1.72    0.30
   0  -9   0    0.39    0.46
   0  -9   0    0.53    0.49
   0  -9   0    0.71    0.48
   0  -9   0    1.32    0.55
   0  -9   0    1.34    0.50
   0  -9   0    0.02    0.47
   0  -9   0    0.34    0.47
   0  -9   0    1.16    0.44
   0  -9   0    0.58    0.52
   0   9   0    1.15    0.21
   0   9   0    0.47    0.50
   0   9   0    1.03    0.21
   0   9   0    0.86    0.52
   0   9   0    0.35    0.49
   0   9   0    0.05    0.41
   0   9   0    0.47    0.44
   0   9   0    1.25    0.52
   0   9   0    0.14    0.48
   0   9   0    0.87    0.47
   0   9   0    0.63    0.47
  -1  -9   0    0.54    0.46
  -1  -9   0   -0.58    0.43
  -1  -9   0   -0.46    0.44
  -1  -9   0   -0.26    0.37
  -1  -9   0   -0.06    0.43
  -1  -9   0    0.46    0.44
  -1  -9   0    0.30    0.40
  -1  -9   0    0.91    0.43
  -1  -9   0   -0.02    0.49
   1   9   0   -0.33    0.42
   1   9   0    1.27    0.53
   1   9   0   -0.08    0.46
   1   9   0   -0.13    0.46
   1   9   0    0.95    0.44
   1   9   0   -0.30    0.43
   1   9   0   -0.53    0.43
   1   9   0    0.57    0.38
   1   9   0    0.22    0.49
  -2  -9   0    1.31    0.49
  -2  -9   0    1.18    0.48
  -2  -9   0    1.28    0.51
  -2  -9   0    1.67    0.47
  -2  -9   0    1.26    0.42
  -2  -9   0    1.42    0.44
  -2  -9   0    1.46    0.45
  -2  -9   0    0.97    0.48
  -2  -9   0    1.45    0.53
   2   9   0    1.38    0.52
   2   9   0    1.16    0.44
   2   9   0    1.52    0.53
   2   9   0    0.45    0.42
   2   9   0    1.08    0.49
   2   9   0    0.68    0.46
   2   9   0    1.32    0.44
   2   9   0    1.13    0.45
  -3  -9   0    1.05    0.49
  -3  -9   0    1.34    0.43
  -3  -9   0    1.53    0.47
  -3  -9   0    1.74    0.56
  -3  -9   0    1.49    0.42
  -3  -9   0    2.13    0.49
  -3  -9   0    1.80    0.47
  -3  -9   0    1.78    0.53
  -3  -9   0    1.85    0.50
  -3  -9   0    2.24    0.54
   3   9   0    2.22    0.45
   3   9   0    2.18    0.57
   3   9   0    1.67    0.47
   3   9   0    1.99    0.44
   3   9   0    2.22    0.46
   3   9   0    2.14    0.48
   3   9   0    2.66    0.60
  -4  -9   0    1.49    0.56
  -4  -9   0    1.52    0.45
  -4  -9   0    1.48    0.45
  -4  -9   0    0.75    0.54
  -4  -9   0    1.14    0.43
  -4  -9   0    1.39    0.56
  -4  -9   0    1.70    0.45
  -4  -9   0    2.74    0.64
  -4  -9   0    0.93    0.40
  -4  -9   0    0.68    0.39
   4   9   0    1.51    0.46
   4   9   0    1.19    0.42
   4   9   0    0.98    0.44
   4   9   0    1.60    0.57
   4   9   0    1.55    0.57
   4   9   0    1.15    0.39
   4   9   0    1.94    0.43
   4   9   0    1.56    0.40
  -5  -9   0   17.04    0.90
  -5  -9   0   15.97    1.10
  -5  -9   0   16.57    1.06
  -5  -9   0   18.63    0.86
  -5  -9   0   15.78    1.05
  -5  -9   0   16.94    0.53
  -5  -9   0   16.53    1.08
  -5  -9   0   16.66    0.79
  -5  -9   0   17.49    0.52
  -5  -9   0   17.97    0.82
  -5  -9   0   18.07    0.86
  -5  -9   0   16.19    0.92
   5   9   0   17.03    0.85
   5   9   0   17.54    0.91
   5   9   0   15.12    1.05
   5   9   0   16.97    1.05
   5   9   0   16.01    0.78
   5   9   0   17.41    0.91
   5   9   0   15.69    0.90
   5   9   0   17.44    0.81
  -6  -9   0    0.50    0.57
  -6  -9   0    1.19    0.40
  -6  -9   0    0.36    0.60
  -6  -9   0    0.54    0.55
  -6  -9   0    1.13    0.37
  -6  -9   0    0.74    0.40
  -6  -9   0    1.43    0.44
  -6  -9   0    0.89    0.30
  -6  -9   0    2.00    0.71
  -6  -9   0    1.06    0.29
  -6  -9   0    1.53    0.48
   6   9   0    0.96    0.41
   6   9   0    1.01    0.38
   6   9   0    1.24    0.38
   6   9   0    1.47    0.44
   6   9   0    2.02    0.49
   6   9   0    0.79    0.54
   6   9   0    0.75    0.44
   6   9   0    0.81    0.66
  -7  -9   0    1.41    0.67
  -7  -9   0    2.52    0.71
  -7  -9   0    3.65    0.49
  -7  -9   0    3.40    0.50
  -7  -9   0    3.05    0.72
  -7  -9   0    2.77    0.39
  -7  -9   0    2.82    0.44
  -7  -9   0    1.94    0.42
  -7  -9   0    3.11    0.50
  -7  -9   0    2.76    0.51
  -7  -9   0    2.59    0.76
   7   9   0    2.71    0.51
   7   9   0    3.00    0.48
   7   9   0    2.36    0.49
   7   9   0    2.44    0.65
   7   9   0    2.63    0.40
   7   9   0    2.87    0.54
   7   9   0    3.14    0.41
   7   9   0    3.17    0.53
   7   9   0    2.74    0.82
  -8  -9   0    8.08    0.81
  -8  -9   0    6.50    0.86
  -8  -9   0    8.55    0.71
  -8  -9   0    9.12    0.61
  -8  -9   0    8.71    0.62
  -8  -9   0    7.36    0.69
  -8  -9   0   10.96    1.27
  -8  -9   0    7.94    0.73
  -8  -9   0    9.63    1.11
  -8  -9   0    8.08    0.58
   8   9   0    7.57    0.99
   8   9   0    9.17    0.62
   8   9   0    7.35    0.80
   8   9   0    7.63    0.83
   8   9   0    7.93    0.85
   8   9   0   10.33    0.78
   8   9   0    9.15    1.06
   8   9   0    9.70    0.84
   8   9   0    8.62    1.11
  -9  -9   0    3.86    0.84
  -9  -9   0    3.20    0.48
  -9  -9   0    3.63    0.82
  -9  -9   0    3.09    0.40
  -9  -9   0    3.35    0.58
  -9  -9   0    3.24    0.42
  -9  -9   0    2.85    0.56
  -9  -9   0    2.83    0.57
  -9  -9   0    2.84    0.37
   9   9   0    3.35    0.55
   9   9   0    3.45    0.77
   9   9   0    3.51    0.58
   9   9   0    4.18    0.79
   9   9   0    4.93    0.65
   9   9   0    3.65    0.66
 -10  -9   0    0.18    0.74
 -10  -9   0    1.16    0.56
 -10  -9   0   -1.43    0.93
 -10  -9   0    1.74    0.56
 -10  -9   0   -0.14    0.32
 -10  -9   0    1.00    0.35
 -10  -9   0    0.09    0.44
 -10  -9   0    0.59    0.51
 -10  -9   0    0.28    0.30
 -10  -9   0   -0.12    0.34
  10   9   0    1.10    0.63
  10   9   0    0.83    0.53
  10   9   0    1.37    0.69
  10   9   0    0.27    0.49
  10   9   0    0.79    0.54
  10   9   0    0.63    0.75
 -11  -9   0   -1.14    0.82
 -11  -9   0    0.60    0.57
 -11  -9   0    0.99    0.68
 -11  -9   0    1.30    0.48
 -11  -9   0    0.10    0.32
 -11  -9   0    0.47    0.29
 -11  -9   0    1.15    0.35
 -11  -9   0    0.43    0.58
 -11  -9   0    1.16    0.36
  11   9   0    1.34    0.89
  11   9   0    0.07    0.56
  11   9   0    1.19    0.79
  11   9   0    2.41    0.61
  11   9   0    0.13    0.72
  11   9   0    0.12    0.55
 -12  -9   0    0.37    0.96
 -12  -9   0    0.09    0.73
 -12  -9   0    0.24    0.61
 -12  -9   0    0.20    0.61
  12   9   0    0.39    0.63
  12   9   0    0.61    0.79
  12   9   0    0.31    0.61
  12   9   0    1.04    0.92
  12   9   0   -0.08    0.59
 -13  -9   0    0.66    0.70
 -13  -9   0    1.40    0.89
 -13  -9   0    0.49    0.99
 -13  -9   0    1.00    0.68
  13   9   0    0.13    0.72
  13   9   0    0.97    0.71
  13   9   0    1.01    0.67
  13   9   0    0.13    1.01
  13   9   0    1.43    0.88
 -14  -9   0   -0.16    0.77
 -14  -9   0    0.55    0.81
 -14  -9   0    0.47    1.01
 -14  -9   0   -1.47    1.15
  14   9   0    1.11    1.16
  14   9   0   -0.07    1.41
  14   9   0    0.37    0.97
  14   9   0   -0.80    0.76
 -15  -9   0   -0.38    1.17
 -15  -9   0   -0.58    0.85
 -15  -9   0    0.66    1.27
  15   9   0    0.76    0.89
  15   9   0   -0.08    1.33
  15   9   0    2.68    1.10
 -16  -9   0   -0.14    0.95
 -16  -9   0   -1.11    1.29
 -16  -9   0   -0.67    1.38
  16   9   0   -1.04    1.41
  16   9   0   -0.62    0.98
  12 -10   0    0.90    1.42
  12 -10   0    0.05    1.65
  12 -10   0    0.84    1.48
 -12  10   0    0.04    1.73
 -12  10   0    3.69    1.52
 -12  10   0    0.47    1.49
  11 -10   0    1.23    1.53
  11 -10   0    2.03    1.27
  11 -10   0    0.67    1.56
 -11  10   0   -1.90    1.47
 -11  10   0   -1.25    1.25
 -11  10   0   -1.39    1.27
  10 -10   0    3.33    1.29
  10 -10   0    4.71    1.38
  10 -10   0    3.71    1.39
  10 -10   0    4.07    1.21
 -10  10   0    3.25    1.21
 -10  10   0    4.66    1.48
 -10  10   0    2.38    1.31
   9 -10   0    1.45    1.13
   9 -10   0   -1.29    1.09
   9 -10   0    1.96    1.05
   9 -10   0    2.89    1.25
   9 -10   0    1.24    1.16
  -9  10   0    0.61    1.16
  -9  10   0    1.50    1.11
  -9  10   0   -1.21    1.11
  -9  10   0    0.31    1.09
   8 -10   0    0.08    0.95
   8 -10   0    0.27    1.04
   8 -10   0    2.29    1.28
   8 -10   0   -0.48    1.06
   8 -10   0    0.57    0.49
   8 -10   0    0.90    0.97
  -8  10   0    0.67    0.99
  -8  10   0    1.26    1.07
  -8  10   0    1.52    0.86
  -8  10   0    0.19    1.11
  -8  10   0    2.02    1.02
   7 -10   0   15.84    2.12
   7 -10   0   14.55    1.50
   7 -10   0   13.24    1.78
   7 -10   0   13.65    0.98
   7 -10   0   15.03    1.66
   7 -10   0   13.49    1.56
   7 -10   0   15.42    1.51
   7 -10   0   15.84    1.87
  -7  10   0   15.70    1.90
  -7  10   0   16.10    1.75
  -7  10   0   14.83    0.95
  -7  10   0   13.49    1.38
  -7  10   0   15.91    1.32
  -7  10   0   19.39    1.94
  -7  10   0   15.62    1.58
   6 -10   0   -0.17    0.75
   6 -10   0    1.28    1.06
   6 -10   0   -0.50    0.87
   6 -10   0    1.49    0.87
   6 -10   0    1.41    0.58
   6 -10   0   -1.00    0.70
   6 -10   0    1.36    0.86
   6 -10   0   -0.77    0.80
  -6  10   0    1.69    1.32
  -6  10   0    0.94    0.53
  -6  10   0    1.31    0.84
  -6  10   0    2.31    0.68
  -6  10   0    1.89    0.90
  -6  10   0    1.07    1.41
  -6  10   0   -0.17    0.87
  -6  10   0    2.52    0.85
   5 -10   0    0.77    0.77
   5 -10   0    2.04    0.79
   5 -10   0    3.26    0.86
   5 -10   0    2.42    1.25
   5 -10   0    2.73    0.79
   5 -10   0    3.20    0.64
   5 -10   0    3.04    0.83
   5 -10   0    1.50    0.74
  -5  10   0    0.52    0.76
  -5  10   0    1.12    0.75
  -5  10   0    4.51    0.69
  -5  10   0    1.40    0.96
  -5  10   0    3.00    0.58
  -5  10   0    1.59    1.01
  -5  10   0    2.18    0.70
  -5  10   0    2.63    0.72
  -5  10   0    2.68    0.70
  -5  10   0    2.29    0.91
  -5  10   0    2.15    0.82
   4 -10   0    0.90    0.57
   4 -10   0    1.08    0.81
   4 -10   0   -0.58    0.62
   4 -10   0   -0.33    0.66
   4 -10   0    0.55    0.67
   4 -10   0    1.95    0.80
   4 -10   0    1.30    0.80
   4 -10   0    0.07    0.67
  -4  10   0    1.34    0.50
  -4  10   0   -0.37    0.88
  -4  10   0   -0.46    0.97
  -4  10   0   -0.39    0.65
  -4  10   0   -0.03    0.48
  -4  10   0    0.82    0.67
  -4  10   0    1.41    0.83
  -4  10   0   -0.86    0.67
  -4  10   0    0.60    0.73
  -4  10   0    0.16    0.50
  -4  10   0   -0.11    0.60
   3 -10   0    1.40    0.66
   3 -10   0    0.68    0.70
   3 -10   0   -0.52    0.60
   3 -10   0   -0.06    0.71
   3 -10   0    0.40    0.53
   3 -10   0   -0.61    0.60
   3 -10   0    0.65    0.62
   3 -10   0   -0.36    0.64
   3 -10   0    1.40    0.68
  -3  10   0    0.57    0.65
  -3  10   0   -0.08    0.54
  -3  10   0    1.29    0.42
  -3  10   0    0.00    0.47
  -3  10   0    0.03    0.70
  -3  10   0   -0.69    0.42
  -3  10   0   -0.16    0.68
  -3  10   0    0.61    1.07
  -3  10   0   -0.14    0.96
  -3  10   0    0.77    0.61
  -3  10   0   -1.06    0.57
   2 -10   0    5.15    0.74
   2 -10   0    4.63    0.78
   2 -10   0    5.96    0.88
   2 -10   0    5.36    0.76
   2 -10   0    8.23    1.12
   2 -10   0    4.64    0.68
   2 -10   0    5.04    0.76
   2 -10   0    7.04    1.33
   2 -10   0    6.08    0.70
  -2  10   0    5.72    0.79
  -2  10   0    5.60    0.76
  -2  10   0    5.91    0.67
  -2  10   0    5.29    0.73
  -2  10   0    4.90    0.79
  -2  10   0    5.35    0.77
  -2  10   0    5.51    0.51
  -2  10   0    5.20    0.70
  -2  10   0    6.47    0.90
  -2  10   0    5.38    0.82
  -2  10   0    5.66    0.61
   1 -10   0    0.09    0.63
   1 -10   0    0.46    0.65
   1 -10   0   -0.01    0.56
   1 -10   0    0.59    0.54
   1 -10   0    0.07    0.54
   1 -10   0   -0.19    0.50
   1 -10   0    0.28    0.58
   1 -10   0    0.48    0.51
   1 -10   0    0.06    0.55
  -1  10   0    0.76    0.64
  -1  10   0   -0.93    0.64
  -1  10   0   -0.05    0.28
  -1  10   0   -0.02    0.53
  -1  10   0    0.01    0.51
  -1  10   0   -0.07    0.53
  -1  10   0    0.27    0.28
  -1  10   0   -0.22    0.61
  -1  10   0   -0.31    0.54
  -1  10   0   -0.08    0.61
  -1  10   0    0.70    0.49
   0 -10   0    5.43    0.72
   0 -10   0    5.36    0.73
   0 -10   0    4.91    0.73
   0 -10   0    8.87    1.14
   0 -10   0    6.54    0.77
   0 -10   0    5.61    0.74
   0 -10   0    5.55    0.71
   0 -10   0    4.73    0.70
   0 -10   0    5.05    0.67
   0  10   0    5.40    0.66
   0  10   0    5.10    0.35
   0  10   0    5.44    0.68
   0  10   0    4.42    0.36
   0  10   0    4.19    0.70
   0  10   0    4.50    0.67
   0  10   0    4.67    0.66
   0  10   0    4.11    0.67
   0  10   0    4.71    0.73
   0  10   0    5.06    0.71
   0  10   0    5.00    0.71
  -1 -10   0   -0.13    0.46
  -1 -10   0    0.18    0.51
  -1 -10   0   -0.18    0.53
  -1 -10   0   -1.12    0.53
  -1 -10   0    0.73    0.48
  -1 -10   0    0.34    0.48
  -1 -10   0    0.74    0.51
  -1 -10   0    0.38    0.50
  -1 -10   0   -0.15    0.51
   1  10   0   -0.12    0.49
   1  10   0    0.43    0.47
   1  10   0    0.13    0.47
   1  10   0    0.68    0.52
   1  10   0    1.08    0.61
   1  10   0    0.15    0.43
   1  10   0   -0.88    0.50
   1  10   0    0.24    0.48
   1  10   0   -0.30    0.52
  -2 -10   0    3.31    0.71
  -2 -10   0    6.21    0.72
  -2 -10   0    4.38    0.64
  -2 -10   0    4.62    0.62
  -2 -10   0    5.20    0.74
  -2 -10   0    3.70    0.64
  -2 -10   0    2.91    0.64
  -2 -10   0    4.88    0.65
  -2 -10   0    3.74    0.61
   2  10   0    4.43    0.68
   2  10   0    4.18    0.62
   2  10   0    4.33    0.66
   2  10   0    3.52    0.60
   2  10   0    3.58    0.53
   2  10   0    3.01    0.61
   2  10   0    5.00    0.69
   2  10   0    3.98    0.67
   2  10   0    4.09    0.74
  -3 -10   0    5.04    0.68
  -3 -10   0    3.83    0.54
  -3 -10   0    5.20    0.77
  -3 -10   0    5.11    0.72
  -3 -10   0    5.35    0.69
  -3 -10   0    5.48    0.60
  -3 -10   0    5.01    0.65
  -3 -10   0    4.67    0.71
  -3 -10   0    5.17    0.64
  -3 -10   0    4.90    0.63
   3  10   0    6.12    0.74
   3  10   0    5.34    0.70
   3  10   0    4.99    0.60
   3  10   0    5.81    0.68
   3  10   0    4.64    0.58
   3  10   0    5.28    0.63
   3  10   0    3.96    0.86
   3  10   0    4.68    0.66
  -4 -10   0   18.89    1.04
  -4 -10   0   18.67    1.14
  -4 -10   0   18.49    1.02
  -4 -10   0   19.05    0.94
  -4 -10   0   17.56    0.99
  -4 -10   0   20.02    0.98
  -4 -10   0   18.32    1.19
  -4 -10   0   17.88    0.92
  -4 -10   0   17.08    1.11
  -4 -10   0   16.85    1.08
   4  10   0   19.47    0.96
   4  10   0   17.96    1.01
   4  10   0   18.66    0.95
   4  10   0   18.24    1.02
   4  10   0   17.56    1.08
   4  10   0   18.61    0.92
   4  10   0   16.14    1.12
  -5 -10   0    2.67    0.52
  -5 -10   0    1.68    0.45
  -5 -10   0    2.18    0.52
  -5 -10   0    2.73    0.53
  -5 -10   0    2.97    0.74
  -5 -10   0    1.68    0.62
  -5 -10   0    2.28    0.56
  -5 -10   0    2.88    0.72
  -5 -10   0    2.53    0.50
  -5 -10   0    2.37    0.69
   5  10   0    1.63    0.54
   5  10   0    2.33    0.50
   5  10   0    1.80    0.66
   5  10   0    2.33    0.49
   5  10   0    2.45    0.47
   5  10   0    2.03    0.63
   5  10   0    2.12    0.47
   5  10   0    2.34    0.55
  -6 -10   0    1.51    0.47
  -6 -10   0    1.88    0.27
  -6 -10   0    0.85    0.41
  -6 -10   0    0.71    0.45
  -6 -10   0    1.32    0.49
  -6 -10   0    1.10    0.50
  -6 -10   0    1.61    0.30
  -6 -10   0    1.01    0.44
  -6 -10   0    0.38    0.66
  -6 -10   0    1.64    0.65
  -6 -10   0    1.27    0.78
  -6 -10   0    2.49    0.69
   6  10   0    0.81    0.60
   6  10   0    1.28    0.43
   6  10   0    1.27    0.41
   6  10   0    0.97    0.46
   6  10   0    0.91    0.74
   6  10   0    0.84    0.47
   6  10   0    0.99    0.48
   6  10   0    0.77    0.53
  -7 -10   0    0.12    0.48
  -7 -10   0    0.61    0.62
  -7 -10   0   -0.17    0.61
  -7 -10   0    0.32    0.34
  -7 -10   0    0.76    0.56
  -7 -10   0    0.48    0.42
  -7 -10   0    0.52    0.49
  -7 -10   0    1.67    0.84
  -7 -10   0    0.66    0.45
  -7 -10   0   -0.28    0.35
  -7 -10   0   -0.72    0.64
   7  10   0   -0.47    0.46
   7  10   0    0.60    0.38
   7  10   0   -0.15    0.75
   7  10   0    0.55    0.47
   7  10   0    0.53    0.39
   7  10   0    0.00    0.47
   7  10   0   -0.49    0.58
   7  10   0    0.57    0.47
  -8 -10   0    0.61    0.51
  -8 -10   0    0.31    0.45
  -8 -10   0   -0.26    0.68
  -8 -10   0    0.35    0.37
  -8 -10   0    0.44    0.68
  -8 -10   0    0.16    0.46
  -8 -10   0   -0.71    0.38
  -8 -10   0    0.63    0.74
  -8 -10   0   -0.53    0.57
   8  10   0    0.62    0.51
   8  10   0   -0.50    0.37
   8  10   0   -0.37    0.51
   8  10   0    1.04    0.71
   8  10   0   -0.42    0.47
   8  10   0   -0.30    0.38
  -9 -10   0    2.20    0.82
  -9 -10   0    1.86    0.44
  -9 -10   0    2.88    0.63
  -9 -10   0    2.71    0.64
  -9 -10   0    1.46    0.52
  -9 -10   0    2.32    0.51
  -9 -10   0    1.48    0.41
  -9 -10   0    0.26    0.75
  -9 -10   0    1.89    0.40
   9  10   0    2.77    0.83
   9  10   0    1.91    0.42
   9  10   0    2.36    0.59
   9  10   0    2.44    0.58
   9  10   0    3.27    0.59
   9  10   0    2.03    0.80
   9  10   0    1.82    0.74
 -10 -10   0    6.85    0.66
 -10 -10   0    8.14    0.78
 -10 -10   0    7.19    0.60
 -10 -10   0    9.62    1.09
 -10 -10   0   10.19    0.79
 -10 -10   0    7.25    0.64
 -10 -10   0    6.45    0.95
 -10 -10   0    7.32    0.94
  10  10   0    7.42    0.80
  10  10   0    7.03    0.88
  10  10   0    7.46    1.32
  10  10   0    8.14    0.99
  10  10   0    7.14    0.79
 -11 -10   0    8.83    1.06
 -11 -10   0   11.74    1.54
 -11 -10   0    9.21    0.60
 -11 -10   0    7.79    0.58
 -11 -10   0    8.26    0.62
 -11 -10   0    8.37    0.99
 -11 -10   0    9.28    0.76
 -11 -10   0    8.03    1.03
 -11 -10   0    8.49    0.63
 -11 -10   0    9.11    1.11
  11  10   0    9.98    1.19
  11  10   0    8.54    0.90
  11  10   0    7.02    0.96
  11  10   0    9.35    1.09
  11  10   0    8.76    1.00
  11  10   0    8.54    1.06
 -12 -10   0    1.05    0.66
 -12 -10   0   -1.12    0.98
 -12 -10   0    1.92    0.70
 -12 -10   0   -0.99    0.70
  12  10   0    0.69    0.67
  12  10   0    0.89    0.97
  12  10   0    0.01    0.62
  12  10   0   -0.33    0.66
  12  10   0   -0.61    0.89
  12  10   0   -1.64    0.99
 -13 -10   0    0.31    0.71
 -13 -10   0    0.39    1.09
 -13 -10   0    1.08    0.73
 -13 -10   0   -0.16    0.88
  13  10   0    1.10    0.91
  13  10   0    0.36    1.10
  13  10   0    0.06    0.71
  13  10   0    1.06    0.75
 -14 -10   0    0.64    0.87
 -14 -10   0    0.73    0.77
 -14 -10   0   -1.65    1.24
  14  10   0    1.06    0.80
  14  10   0    1.75    1.16
  14  10   0    1.53    1.07
 -15 -10   0    1.66    1.48
 -15 -10   0    2.83    0.94
 -15 -10   0    0.64    1.24
  15  10   0    1.77    0.92
  15  10   0    1.50    1.35
 -16 -10   0    0.66    1.41
 -16 -10   0    1.11    1.04
 -16 -10   0    1.64    1.55
  16  10   0   -0.83    1.53
  16  10   0    2.53    1.04
  11 -11   0    2.90    1.71
  11 -11   0    3.29    1.67
  11 -11   0    1.31    1.39
 -11  11   0   -2.13    1.73
 -11  11   0    1.04    1.53
 -11  11   0   -1.68    1.37
  10 -11   0    1.13    1.18
  10 -11   0   -0.22    1.39
  10 -11   0    2.01    1.53
 -10  11   0    1.48    1.53
 -10  11   0    3.84    1.46
 -10  11   0    0.68    1.28
   9 -11   0    0.10    1.21
   9 -11   0    1.23    1.17
   9 -11   0    0.13    1.05
  -9  11   0    1.42    1.24
  -9  11   0    1.63    1.23
  -9  11   0    0.65    1.09
   8 -11   0   -0.64    1.03
   8 -11   0    0.97    0.56
   8 -11   0    1.83    1.03
   8 -11   0    0.60    1.13
   8 -11   0   -0.96    1.14
   8 -11   0   -0.03    1.12
  -8  11   0   -0.17    0.93
  -8  11   0    1.30    1.18
  -8  11   0    1.85    1.16
  -8  11   0   -1.39    1.03
   7 -11   0   -1.40    1.17
   7 -11   0    0.83    1.09
   7 -11   0   -1.31    0.89
   7 -11   0   -0.29    0.65
   7 -11   0    1.41    0.92
   7 -11   0   -0.36    1.06
  -7  11   0    0.06    1.05
  -7  11   0    0.70    0.94
  -7  11   0    1.43    1.33
  -7  11   0    0.22    0.59
  -7  11   0   -0.79    0.75
  -7  11   0   -0.38    1.55
   6 -11   0    0.40    0.67
   6 -11   0   -0.30    0.86
   6 -11   0    1.02    0.91
   6 -11   0    0.37    0.92
   6 -11   0    0.64    1.00
   6 -11   0   -0.14    0.84
   6 -11   0   -1.53    1.66
   6 -11   0    0.00    0.92
  -6  11   0    3.46    1.11
  -6  11   0   -0.19    0.58
  -6  11   0   -1.65    1.07
  -6  11   0   -0.50    0.90
  -6  11   0    1.46    0.84
  -6  11   0   -0.33    0.67
  -6  11   0    1.49    1.16
  -6  11   0    0.01    0.93
   5 -11   0    5.95    1.00
   5 -11   0    5.73    0.95
   5 -11   0    6.68    0.81
   5 -11   0    6.57    1.02
   5 -11   0    5.24    1.02
   5 -11   0    5.20    1.11
   5 -11   0    5.89    1.74
   5 -11   0    6.13    1.02
  -5  11   0   13.22    2.08
  -5  11   0    4.50    0.94
  -5  11   0    5.09    1.10
  -5  11   0    7.14    0.76
  -5  11   0    3.84    0.92
  -5  11   0    5.94    0.78
  -5  11   0    7.07    0.89
  -5  11   0    8.05    1.32
   4 -11   0    4.16    0.90
   4 -11   0    3.82    0.90
   4 -11   0    4.27    0.95
   4 -11   0    2.94    0.99
   4 -11   0    3.78    0.89
   4 -11   0    4.04    0.72
   4 -11   0    4.84    0.95
   4 -11   0    4.61    1.03
  -4  11   0    3.61    0.70
  -4  11   0    3.31    0.62
  -4  11   0    5.44    1.56
  -4  11   0    4.45    1.03
  -4  11   0    5.19    1.08
  -4  11   0    2.78    0.81
  -4  11   0    4.85    0.86
  -4  11   0    2.35    0.97
  -4  11   0    2.86    0.95
  -4  11   0    4.57    0.72
   3 -11   0    0.79    0.65
   3 -11   0    0.50    0.81
   3 -11   0    2.31    0.77
   3 -11   0    2.13    0.75
   3 -11   0    0.43    0.71
   3 -11   0    3.03    0.71
   3 -11   0    1.58    0.81
   3 -11   0    0.92    0.74
  -3  11   0    0.92    0.50
  -3  11   0    0.20    0.82
  -3  11   0    0.05    0.76
  -3  11   0    0.34    0.69
  -3  11   0    1.80    0.49
  -3  11   0    1.86    0.77
  -3  11   0    0.20    0.54
  -3  11   0    1.92    0.76
  -3  11   0    1.75    0.72
  -3  11   0    1.54    0.82
  -3  11   0    1.59    1.00
   2 -11   0   -0.63    0.73
   2 -11   0    0.73    0.67
   2 -11   0   -0.47    0.61
   2 -11   0   -0.25    0.64
   2 -11   0    1.21    0.68
   2 -11   0    0.18    0.53
   2 -11   0    0.15    0.76
   2 -11   0    0.44    0.63
  -2  11   0    0.06    0.40
  -2  11   0    0.59    0.38
  -2  11   0   -0.35    0.74
  -2  11   0    0.56    0.69
  -2  11   0   -0.66    0.51
  -2  11   0    0.17    0.77
  -2  11   0   -1.33    0.69
  -2  11   0   -1.29    0.64
  -2  11   0    0.64    0.64
  -2  11   0   -0.39    0.63
  -2  11   0    0.74    0.70
   1 -11   0    2.07    0.69
   1 -11   0    1.22    0.62
   1 -11   0    2.92    0.71
   1 -11   0    1.93    0.70
   1 -11   0    0.15    0.67
   1 -11   0    1.61    0.72
   1 -11   0    0.47    0.62
   1 -11   0    1.30    0.68
   1 -11   0    1.20    0.69
  -1  11   0    0.28    0.69
  -1  11   0    0.79    0.72
  -1  11   0    1.30    0.66
  -1  11   0    1.34    0.33
  -1  11   0   -0.47    0.76
  -1  11   0    0.39    0.66
  -1  11   0    0.61    0.63
  -1  11   0    1.30    0.33
  -1  11   0    1.18    0.55
  -1  11   0    1.77    0.70
   0 -11   0    0.84    0.59
   0 -11   0   -0.03    0.49
   0 -11   0    0.95    0.64
   0 -11   0    0.21    0.60
   0 -11   0   -0.24    0.63
   0 -11   0    0.32    0.66
   0 -11   0    0.70    0.60
   0 -11   0    0.56    0.58
   0 -11   0    0.07    0.60
   0  11   0   -0.10    0.64
   0  11   0    0.33    0.22
   0  11   0    0.12    0.65
   0  11   0    0.58    0.56
   0  11   0    1.35    0.72
   0  11   0    0.71    0.62
   0  11   0   -0.32    0.53
   0  11   0   -0.46    0.53
   0  11   0    1.10    0.57
   0  11   0    0.44    0.21
   0  11   0    0.55    0.69
  -1 -11   0    0.23    0.57
  -1 -11   0    1.43    0.66
  -1 -11   0    0.78    0.51
  -1 -11   0    0.52    0.60
  -1 -11   0    0.76    0.59
  -1 -11   0   -0.09    0.64
  -1 -11   0    0.94    0.57
  -1 -11   0    0.56    0.53
  -1 -11   0   -0.35    0.54
   1  11   0    0.66    0.54
   1  11   0    0.42    0.63
   1  11   0    0.50    0.56
   1  11   0    0.89    0.56
   1  11   0    0.40    0.59
   1  11   0    0.39    0.64
   1  11   0    0.06    0.72
   1  11   0    1.17    0.57
   1  11   0    0.30    0.67
  -2 -11   0   15.77    1.14
  -2 -11   0   18.29    1.09
  -2 -11   0   16.87    1.17
  -2 -11   0   20.03    1.18
  -2 -11   0   17.25    1.20
  -2 -11   0   15.81    1.10
  -2 -11   0   18.57    1.19
  -2 -11   0   18.63    1.22
  -2 -11   0   18.14    1.10
   2  11   0   16.33    1.21
   2  11   0   15.92    1.06
   2  11   0   14.47    1.13
   2  11   0   16.68    1.09
   2  11   0   17.57    1.07
   2  11   0   16.57    1.22
   2  11   0   18.43    1.22
   2  11   0   18.08    1.12
   2  11   0   17.06    1.09
  -3 -11   0    5.45    0.67
  -3 -11   0    5.72    0.73
  -3 -11   0    6.82    0.79
  -3 -11   0    6.08    0.74
  -3 -11   0    6.92    0.86
  -3 -11   0    4.53    0.73
  -3 -11   0    5.18    0.71
  -3 -11   0    5.78    0.82
  -3 -11   0    5.11    0.83
  -3 -11   0    6.38    0.88
   3  11   0    5.09    0.66
   3  11   0    4.70    0.76
   3  11   0    7.72    0.97
   3  11   0    5.82    0.76
   3  11   0    5.02    0.64
   3  11   0    6.34    0.80
   3  11   0    7.14    0.86
  -4 -11   0    5.26    0.84
  -4 -11   0    4.12    0.62
  -4 -11   0    4.31    0.69
  -4 -11   0    4.66    0.67
  -4 -11   0    3.72    0.63
  -4 -11   0    3.57    0.77
  -4 -11   0    3.46    0.71
  -4 -11   0    3.71    0.65
  -4 -11   0    4.08    0.64
  -4 -11   0    3.10    0.75
   4  11   0    4.62    0.76
   4  11   0    4.68    0.69
   4  11   0    4.42    0.69
   4  11   0    3.96    0.79
   4  11   0    4.29    0.59
   4  11   0    3.98    0.62
  -5 -11   0    2.40    0.53
  -5 -11   0    1.09    0.68
  -5 -11   0    1.56    0.73
  -5 -11   0    1.48    0.57
  -5 -11   0    1.60    0.54
  -5 -11   0    0.77    0.66
  -5 -11   0    1.51    0.57
  -5 -11   0    1.01    0.53
  -5 -11   0    1.29    0.57
   5  11   0    1.70    0.54
   5  11   0    0.60    0.53
   5  11   0    1.77    0.58
   5  11   0    1.55    0.50
   5  11   0    3.16    0.73
   5  11   0    1.44    0.69
   5  11   0    2.66    0.54
   5  11   0    0.66    0.51
  -6 -11   0    1.58    0.75
  -6 -11   0    0.67    0.45
  -6 -11   0    0.96    0.53
  -6 -11   0    1.04    0.51
  -6 -11   0    1.15    0.67
  -6 -11   0    0.79    0.53
  -6 -11   0    0.13    1.10
  -6 -11   0    0.57    0.55
   6  11   0    1.09    0.46
   6  11   0    1.41    0.54
   6  11   0    0.37    0.80
   6  11   0    0.95    0.46
   6  11   0    1.68    0.51
   6  11   0    0.58    0.66
   6  11   0    0.61    0.53
  -7 -11   0    0.03    0.81
  -7 -11   0    0.05    0.54
  -7 -11   0    0.77    0.31
  -7 -11   0    0.17    0.51
  -7 -11   0   -0.76    0.40
  -7 -11   0    0.30    0.70
  -7 -11   0    0.67    0.51
  -7 -11   0    0.70    0.35
  -7 -11   0    1.24    0.74
   7  11   0   -0.53    0.53
   7  11   0    0.08    0.45
   7  11   0    0.53    0.45
   7  11   0   -0.12    0.49
   7  11   0   -0.16    0.51
   7  11   0    1.21    0.69
  -8 -11   0    2.14    0.80
  -8 -11   0    2.30    0.47
  -8 -11   0    1.74    0.46
  -8 -11   0    2.59    0.89
  -8 -11   0    1.95    0.54
  -8 -11   0    0.53    0.54
  -8 -11   0    1.38    0.48
  -8 -11   0    1.95    0.64
  -8 -11   0    0.45    0.53
   8  11   0    0.91    0.58
   8  11   0    0.95    0.46
   8  11   0    1.22    0.58
   8  11   0    1.85    0.79
   8  11   0    1.98    0.49
   8  11   0    1.67    0.61
  -9 -11   0    0.07    0.57
  -9 -11   0    0.52    0.41
  -9 -11   0   -0.70    0.74
  -9 -11   0    0.48    0.44
  -9 -11   0    0.23    0.46
  -9 -11   0    0.84    0.54
  -9 -11   0    0.21    0.81
  -9 -11   0    0.30    0.52
   9  11   0    0.29    1.03
   9  11   0    0.56    0.74
   9  11   0    0.65    0.42
   9  11   0   -0.06    0.93
   9  11   0   -0.30    0.54
 -10 -11   0    2.90    0.63
 -10 -11   0    3.03    0.65
 -10 -11   0    2.08    0.68
 -10 -11   0    1.12    0.43
 -10 -11   0    2.19    0.46
 -10 -11   0    1.85    0.92
 -10 -11   0    1.05    0.63
 -10 -11   0    1.71    0.58
 -10 -11   0    2.53    0.47
 -10 -11   0    1.77    0.50
 -10 -11   0    1.52    0.97
  10  11   0    1.08    0.83
  10  11   0    2.11    0.66
  10  11   0    2.13    0.68
 -11 -11   0    2.03    0.70
 -11 -11   0    1.17    0.42
 -11 -11   0    1.13    0.54
 -11 -11   0    1.10    0.40
 -11 -11   0    0.80    0.95
 -11 -11   0    0.10    0.66
 -11 -11   0    1.54    1.02
 -11 -11   0    1.31    0.49
 -11 -11   0    1.17    0.43
 -11 -11   0    2.97    0.86
 -11 -11   0    1.25    0.65
  11  11   0    2.21    0.70
  11  11   0    0.59    0.92
  11  11   0    1.48    0.92
  11  11   0    0.53    0.66
  11  11   0    0.74    0.64
 -12 -11   0    4.02    0.86
 -12 -11   0    1.63    0.76
 -12 -11   0    1.23    1.03
 -12 -11   0    3.14    0.96
 -12 -11   0    3.18    0.78
  12  11   0    1.22    1.03
  12  11   0    2.40    1.19
  12  11   0    2.00    0.74
  12  11   0    2.86    0.72
  12  11   0    2.71    0.78
 -13 -11   0    0.76    0.78
 -13 -11   0    0.71    0.89
 -13 -11   0   -0.28    0.76
 -13 -11   0   -1.39    1.12
  13  11   0   -0.75    0.71
  13  11   0   -0.52    1.07
  13  11   0    0.50    1.04
  13  11   0   -0.51    0.92
 -14 -11   0   -1.08    0.81
 -14 -11   0    1.67    1.09
 -14 -11   0    2.02    1.46
  14  11   0    0.64    1.12
  14  11   0    1.33    1.29
  14  11   0   -0.54    0.83
 -15 -11   0    1.44    1.18
 -15 -11   0    2.03    0.96
 -15 -11   0    1.98    1.41
  15  11   0    0.92    0.92
  15  11   0   -3.09    1.33
  15  11   0    2.12    1.25
  10 -12   0   -0.32    1.35
  10 -12   0    1.45    1.25
  10 -12   0    2.88    1.56
 -10  12   0   -0.09    1.67
 -10  12   0    0.53    1.33
 -10  12   0   -1.35    1.42
   9 -12   0   -0.47    1.36
   9 -12   0   -0.06    1.30
   9 -12   0   -0.68    1.07
  -9  12   0   -0.68    1.32
  -9  12   0   -1.95    1.13
  -9  12   0    1.15    1.49
   8 -12   0    6.09    2.01
   8 -12   0    4.31    1.49
   8 -12   0    5.32    1.34
   8 -12   0    7.26    1.25
   8 -12   0    5.62    1.51
  -8  12   0    5.58    1.22
  -8  12   0    4.74    1.39
  -8  12   0    5.36    1.33
   7 -12   0    3.45    1.30
   7 -12   0    3.61    1.20
   7 -12   0    1.13    1.29
   7 -12   0    0.99    2.27
   7 -12   0    2.96    1.08
   7 -12   0    2.67    1.06
  -7  12   0    3.04    1.24
  -7  12   0    2.57    1.28
  -7  12   0    1.49    0.94
  -7  12   0    4.64    1.16
  -7  12   0    2.22    0.74
   6 -12   0    3.55    1.06
   6 -12   0    6.54    1.38
   6 -12   0    2.94    1.15
   6 -12   0    3.48    1.14
   6 -12   0    4.62    0.89
   6 -12   0    3.35    1.46
   6 -12   0    2.77    1.04
  -6  12   0    6.19    1.13
  -6  12   0    2.97    0.86
  -6  12   0    2.84    0.75
  -6  12   0    4.99    1.30
  -6  12   0    3.32    1.49
  -6  12   0    5.43    1.28
  -6  12   0    4.58    0.95
   5 -12   0   -0.42    0.89
   5 -12   0    0.70    0.93
   5 -12   0    1.65    0.94
   5 -12   0    0.94    0.97
   5 -12   0    1.32    0.94
   5 -12   0    0.73    0.76
   5 -12   0    1.49    0.80
   5 -12   0   -2.69    1.15
  -5  12   0    0.48    0.65
  -5  12   0   -0.56    0.66
  -5  12   0    1.09    0.81
  -5  12   0    3.04    1.18
  -5  12   0    1.66    0.93
  -5  12   0    0.89    1.03
  -5  12   0    2.01    0.93
  -5  12   0    0.59    0.98
   4 -12   0    1.02    1.30
   4 -12   0    1.80    0.84
   4 -12   0    0.40    0.82
   4 -12   0    0.15    0.76
   4 -12   0   -0.01    0.81
   4 -12   0    1.65    1.09
   4 -12   0    1.39    0.95
   4 -12   0   -1.77    1.66
  -4  12   0    0.58    0.83
  -4  12   0    0.16    0.82
  -4  12   0    0.61    1.30
  -4  12   0   -0.22    0.82
  -4  12   0   -0.85    0.59
  -4  12   0   -0.15    0.56
  -4  12   0   -1.61    0.65
  -4  12   0    1.30    1.69
  -4  12   0   -1.18    0.64
   3 -12   0    5.04    0.88
   3 -12   0    3.33    0.97
   3 -12   0    3.15    0.90
   3 -12   0    3.80    0.92
   3 -12   0    6.27    0.97
   3 -12   0    3.34    0.95
   3 -12   0    4.63    1.00
   3 -12   0    3.50    0.85
  -3  12   0    1.47    0.89
  -3  12   0    4.65    0.60
  -3  12   0    2.88    0.71
  -3  12   0    3.52    0.90
  -3  12   0    3.87    0.92
  -3  12   0    2.57    0.74
  -3  12   0    3.71    0.93
  -3  12   0    4.18    0.63
  -3  12   0    1.93    0.83
   2 -12   0    0.95    0.76
   2 -12   0    1.06    0.78
   2 -12   0    0.83    0.82
   2 -12   0    0.14    0.78
   2 -12   0    0.38    0.68
   2 -12   0    0.13    0.86
   2 -12   0    0.14    0.71
   2 -12   0    0.99    0.72
  -2  12   0    2.48    0.84
  -2  12   0    2.33    1.68
  -2  12   0    0.25    0.87
  -2  12   0    0.68    0.79
  -2  12   0    0.35    0.74
  -2  12   0    0.85    0.80
  -2  12   0    1.12    0.63
  -2  12   0    0.58    0.85
  -2  12   0    1.39    0.47
  -2  12   0    0.75    0.44
   1 -12   0    3.11    1.44
   1 -12   0    6.68    0.93
   1 -12   0    7.16    0.91
   1 -12   0    7.74    1.02
   1 -12   0    6.10    0.92
   1 -12   0    8.03    0.98
   1 -12   0    8.80    0.96
  -1  12   0    6.87    0.96
  -1  12   0    7.90    0.90
  -1  12   0    7.18    0.55
  -1  12   0   12.00    1.78
  -1  12   0    8.27    1.11
  -1  12   0    7.84    0.95
  -1  12   0    7.27    0.97
  -1  12   0    6.54    1.02
  -1  12   0    6.35    0.55
  -1  12   0    6.10    0.97
  -1  12   0    6.65    0.93
   0 -12   0   13.41    1.14
   0 -12   0   12.64    1.27
   0 -12   0   11.32    1.21
   0 -12   0   10.48    1.23
   0 -12   0   10.30    1.27
   0 -12   0    9.16    1.00
   0 -12   0   11.90    1.16
   0 -12   0   10.20    1.18
   0 -12   0    9.77    1.25
   0  12   0   11.23    1.30
   0  12   0   11.06    1.16
   0  12   0   10.56    1.17
   0  12   0   11.41    1.11
   0  12   0   11.01    1.20
   0  12   0   12.01    1.30
   0  12   0   11.71    1.30
   0  12   0   13.39    1.40
   0  12   0   11.64    1.30
  -1 -12   0   11.47    1.13
  -1 -12   0   10.79    1.21
  -1 -12   0   10.39    1.26
  -1 -12   0    9.43    1.01
  -1 -12   0   11.16    1.13
  -1 -12   0   13.00    1.60
  -1 -12   0    9.97    1.16
  -1 -12   0    9.56    1.22
   1  12   0    9.57    1.14
   1  12   0   11.81    1.30
   1  12   0   11.10    1.14
   1  12   0   10.08    1.13
   1  12   0    8.58    1.19
   1  12   0   11.70    1.15
   1  12   0   11.47    1.20
   1  12   0   10.22    1.09
   1  12   0   10.78    1.24
  -2 -12   0    1.93    0.73
  -2 -12   0    1.71    0.66
  -2 -12   0    1.19    0.71
  -2 -12   0    1.25    0.69
  -2 -12   0    1.55    0.63
  -2 -12   0    0.55    0.63
  -2 -12   0    1.57    0.74
  -2 -12   0    1.24    0.68
   2  12   0    0.93    0.76
   2  12   0    1.03    0.62
   2  12   0    2.50    0.70
   2  12   0    1.29    0.62
   2  12   0    1.41    0.67
   2  12   0    0.70    0.64
   2  12   0    0.76    0.65
   2  12   0    0.32    0.58
   2  12   0    1.48    0.78
  -3 -12   0    8.32    1.11
  -3 -12   0    7.30    0.97
  -3 -12   0    7.90    0.90
  -3 -12   0    7.02    0.85
  -3 -12   0    7.26    0.93
  -3 -12   0    7.94    0.99
  -3 -12   0    7.58    0.83
  -3 -12   0    7.62    1.05
  -3 -12   0    7.71    0.99
   3  12   0    8.80    0.96
   3  12   0    6.97    0.81
   3  12   0    7.81    0.87
   3  12   0    6.17    0.91
   3  12   0    7.07    0.80
   3  12   0    8.38    0.92
   3  12   0    5.72    0.80
  -4 -12   0    1.16    0.60
  -4 -12   0    0.76    0.71
  -4 -12   0    0.22    0.63
  -4 -12   0    1.66    0.75
  -4 -12   0    0.70    0.63
  -4 -12   0    1.37    0.59
  -4 -12   0    0.21    0.55
   4  12   0   -0.36    0.73
   4  12   0    0.36    0.54
   4  12   0    0.26    0.59
   4  12   0    1.11    0.66
   4  12   0   -0.11    0.65
   4  12   0    0.52    0.51
   4  12   0    1.00    0.56
  -5 -12   0    4.20    0.90
  -5 -12   0    6.46    0.77
  -5 -12   0    5.23    0.77
  -5 -12   0    6.12    0.72
  -5 -12   0    6.26    0.95
  -5 -12   0    4.86    0.77
  -5 -12   0    4.86    0.71
   5  12   0    5.80    0.71
   5  12   0    6.21    0.86
   5  12   0    5.82    0.83
   5  12   0    3.80    0.67
   5  12   0    6.27    0.74
   5  12   0    5.56    0.69
   5  12   0    5.15    0.92
  -6 -12   0    6.53    0.77
  -6 -12   0    6.12    0.70
  -6 -12   0    8.06    1.01
  -6 -12   0    6.50    0.83
  -6 -12   0    5.42    0.95
  -6 -12   0    7.05    1.00
  -6 -12   0    7.24    0.96
   6  12   0    6.89    0.71
   6  12   0    8.58    1.00
   6  12   0    8.19    0.93
   6  12   0    6.77    0.83
   6  12   0    7.68    1.01
  -7 -12   0    3.39    0.63
  -7 -12   0    3.12    0.57
  -7 -12   0    3.20    0.91
  -7 -12   0    1.73    0.77
  -7 -12   0    3.09    0.30
  -7 -12   0    2.95    0.68
  -7 -12   0    2.75    0.67
   7  12   0    3.08    0.64
   7  12   0    3.41    0.58
   7  12   0    4.07    0.86
   7  12   0    3.40    0.73
   7  12   0    3.38    0.61
   7  12   0    2.33    0.65
  -8 -12   0    3.12    0.47
  -8 -12   0    4.46    0.97
  -8 -12   0    2.75    0.61
  -8 -12   0    2.69    0.56
  -8 -12   0    3.83    0.67
  -8 -12   0    3.02    0.71
   8  12   0    1.85    0.84
   8  12   0    2.75    0.67
   8  12   0    2.36    0.56
   8  12   0    3.60    0.57
   8  12   0    2.04    0.63
  -9 -12   0    0.42    0.65
  -9 -12   0    1.59    0.64
  -9 -12   0   -0.50    0.55
  -9 -12   0    0.90    0.92
  -9 -12   0   -0.67    0.49
  -9 -12   0    0.29    0.58
  -9 -12   0    1.30    0.46
  -9 -12   0    0.14    0.56
  -9 -12   0    0.39    0.49
  -9 -12   0    0.64    0.84
   9  12   0    0.09    0.47
   9  12   0    0.88    0.66
   9  12   0   -0.14    0.82
   9  12   0    0.08    0.59
 -10 -12   0   -0.15    1.01
 -10 -12   0    0.69    0.56
 -10 -12   0    1.84    0.69
 -10 -12   0   -0.71    0.66
 -10 -12   0    0.08    0.62
 -10 -12   0    0.33    0.61
 -10 -12   0    0.06    0.48
 -10 -12   0    0.06    0.45
 -10 -12   0    0.04    0.98
  10  12   0   -0.66    0.63
  10  12   0   -0.65    0.65
 -11 -12   0    0.56    1.02
 -11 -12   0    1.12    1.00
 -11 -12   0    1.15    0.47
 -11 -12   0    0.90    0.49
 -11 -12   0    0.37    0.69
 -11 -12   0    0.73    0.56
 -11 -12   0    1.17    0.66
 -11 -12   0    2.62    0.74
 -11 -12   0    3.51    0.90
 -11 -12   0    0.13    0.64
  11  12   0    0.52    0.71
  11  12   0    0.79    0.70
  11  12   0    1.48    0.73
  11  12   0    1.54    0.96
 -12 -12   0    0.00    1.15
 -12 -12   0   -0.07    1.07
 -12 -12   0   -0.60    0.70
 -12 -12   0    0.33    0.77
 -12 -12   0   -0.44    0.76
  12  12   0    0.43    1.03
  12  12   0    0.59    0.82
  12  12   0   -0.19    0.76
 -13 -12   0    0.10    0.79
 -13 -12   0   -0.76    0.87
 -13 -12   0    1.08    1.31
 -13 -12   0    2.14    1.30
  13  12   0   -0.67    1.07
  13  12   0   -0.03    0.79
 -14 -12   0   -1.78    1.39
 -14 -12   0   -0.74    1.05
 -14 -12   0    1.13    1.32
 -14 -12   0    1.40    0.91
  14  12   0   -0.22    1.30
  14  12   0   -0.76    1.22
  14  12   0    0.75    0.91
 -15 -12   0   -1.34    1.55
 -15 -12   0    4.86    1.64
 -15 -12   0    1.51    1.00
 -15 -12   0   -0.52    1.24
  15  12   0    1.28    0.99
  15  12   0    2.26    1.42
  15  12   0    0.05    1.51
   9 -13   0   -0.06    1.46
   9 -13   0    3.43    1.36
   9 -13   0   -1.05    1.58
  -9  13   0    2.35    1.36
  -9  13   0   -0.49    1.49
  -9  13   0    3.71    1.59
   8 -13   0    1.36    1.35
   8 -13   0   -0.62    1.53
   8 -13   0    0.06    1.18
  -8  13   0    0.72    1.41
  -8  13   0    2.04    1.34
   7 -13   0    0.80    1.32
   7 -13   0    0.85    1.20
   7 -13   0    0.29    1.10
   7 -13   0    1.33    1.38
  -7  13   0    1.34    1.39
  -7  13   0    1.08    1.18
  -7  13   0    3.85    1.24
  -7  13   0   -0.93    0.74
  -7  13   0    0.65    0.98
   6 -13   0    4.95    2.17
   6 -13   0    3.83    1.23
   6 -13   0    6.21    1.24
   6 -13   0   10.23    2.72
   6 -13   0    5.34    1.29
   6 -13   0    6.16    1.20
  -6  13   0    2.60    1.26
  -6  13   0    5.83    1.27
  -6  13   0    5.17    1.75
  -6  13   0    4.83    1.25
  -6  13   0    4.68    0.96
  -6  13   0    4.89    0.93
   5 -13   0    1.77    1.40
   5 -13   0    0.50    1.16
   5 -13   0    0.82    0.94
   5 -13   0    1.30    0.95
   5 -13   0    0.51    0.86
   5 -13   0    1.14    1.11
   5 -13   0   -0.06    1.11
   5 -13   0   -1.44    0.97
  -5  13   0    0.87    0.77
  -5  13   0    1.56    0.90
  -5  13   0   -0.36    0.86
  -5  13   0    0.28    1.05
  -5  13   0    0.33    0.71
  -5  13   0    2.67    1.42
  -5  13   0   -0.22    1.07
  -5  13   0    0.93    1.45
   4 -13   0   10.47    1.49
   4 -13   0    8.60    1.03
   4 -13   0    9.17    1.48
   4 -13   0   16.73    2.40
   4 -13   0   11.13    1.38
   4 -13   0   11.84    1.67
   4 -13   0   15.85    1.75
  -4  13   0   10.26    1.37
  -4  13   0   10.51    1.08
  -4  13   0    9.85    1.19
  -4  13   0    9.76    1.20
  -4  13   0   13.32    2.14
  -4  13   0   12.19    1.89
  -4  13   0   11.07    1.32
  -4  13   0    9.65    1.30
   3 -13   0    2.37    1.04
   3 -13   0    1.61    1.09
   3 -13   0    1.89    0.93
   3 -13   0    0.05    1.07
   3 -13   0   -0.41    0.86
   3 -13   0    1.99    0.96
   3 -13   0    1.64    0.87
  -3  13   0    1.24    0.94
  -3  13   0    1.55    0.98
  -3  13   0    1.73    0.57
  -3  13   0    0.87    1.15
  -3  13   0    1.85    0.76
  -3  13   0    2.44    0.63
  -3  13   0    1.83    1.37
  -3  13   0   -1.32    0.94
  -3  13   0   -1.61    1.09
   2 -13   0    0.26    1.08
   2 -13   0    0.03    0.89
   2 -13   0   -0.65    0.82
   2 -13   0    0.39    0.92
   2 -13   0    0.61    1.39
   2 -13   0    0.76    0.86
   2 -13   0    0.31    0.79
  -2  13   0    0.17    0.44
  -2  13   0    0.98    0.50
  -2  13   0   -0.21    0.84
  -2  13   0    1.82    0.89
  -2  13   0    0.99    0.94
  -2  13   0   -1.07    0.63
  -2  13   0   -0.79    0.88
  -2  13   0    1.97    1.36
  -2  13   0    0.33    0.76
   1 -13   0    1.35    0.85
   1 -13   0    0.92    0.83
   1 -13   0   -0.19    0.77
   1 -13   0   -1.05    0.76
   1 -13   0    0.39    0.79
   1 -13   0    0.78    0.85
  -1  13   0    0.23    0.34
  -1  13   0    0.41    0.33
  -1  13   0   -0.26    0.92
  -1  13   0    0.32    0.68
  -1  13   0    1.97    0.86
  -1  13   0    1.49    0.80
  -1  13   0    0.78    0.83
  -1  13   0   -0.78    0.72
  -1  13   0   -0.97    0.83
   0 -13   0    0.15    0.78
   0 -13   0    0.29    0.81
   0 -13   0    1.65    0.82
   0 -13   0    0.45    0.79
   0 -13   0    2.72    0.88
   0 -13   0    0.90    0.78
   0  13   0    0.02    0.90
   0  13   0    1.28    1.02
   0  13   0    1.03    0.76
   0  13   0    0.58    0.80
   0  13   0    0.94    0.77
   0  13   0    1.32    0.78
   0  13   0    0.92    0.69
  -1 -13   0    0.35    0.77
  -1 -13   0    0.45    0.80
  -1 -13   0    0.51    0.76
  -1 -13   0   -0.14    0.67
  -1 -13   0    0.40    0.69
  -1 -13   0    1.71    0.82
   1  13   0    1.07    0.73
   1  13   0    1.17    0.76
   1  13   0    1.37    0.71
   1  13   0   -0.55    0.66
   1  13   0   -0.21    0.61
   1  13   0    0.44    0.72
  -2 -13   0    4.50    0.91
  -2 -13   0    3.36    0.87
  -2 -13   0    4.46    0.78
  -2 -13   0    3.79    0.90
  -2 -13   0    4.25    0.92
  -2 -13   0    3.95    0.93
  -2 -13   0    3.05    0.73
   2  13   0    4.59    0.88
   2  13   0    3.90    0.82
   2  13   0    3.70    0.78
   2  13   0    2.71    0.76
   2  13   0    4.92    0.91
   2  13   0    5.01    0.89
  -3 -13   0    3.18    0.83
  -3 -13   0    4.12    0.88
  -3 -13   0    3.14    0.87
  -3 -13   0    2.73    0.80
  -3 -13   0    3.71    0.94
  -3 -13   0    2.64    0.72
  -3 -13   0    4.13    1.24
   3  13   0    3.00    0.84
   3  13   0    3.40    0.76
   3  13   0    2.92    0.80
   3  13   0    3.05    0.75
   3  13   0    3.86    0.77
  -4 -13   0    1.19    0.66
  -4 -13   0   -0.30    0.60
  -4 -13   0    1.03    0.71
  -4 -13   0    2.49    0.89
  -4 -13   0    0.78    0.76
  -4 -13   0    1.94    0.78
  -4 -13   0    1.27    0.66
   4  13   0    2.23    0.78
   4  13   0    0.67    0.63
   4  13   0    1.41    0.64
   4  13   0    0.85    0.62
   4  13   0    1.48    0.72
   4  13   0    0.89    0.61
  -5 -13   0   32.83    1.52
  -5 -13   0   31.79    1.44
  -5 -13   0   32.45    1.52
  -5 -13   0   32.44    1.54
  -5 -13   0   33.36    1.78
  -5 -13   0   30.62    1.59
  -5 -13   0   33.19    1.73
   5  13   0   33.47    1.70
   5  13   0   32.98    1.39
   5  13   0   31.56    1.48
   5  13   0   33.95    1.60
   5  13   0   30.50    1.38
  -6 -13   0    0.73    0.86
  -6 -13   0    1.67    0.71
  -6 -13   0    2.02    0.70
  -6 -13   0    1.33    0.70
  -6 -13   0    1.30    0.62
  -6 -13   0   -0.38    0.67
  -6 -13   0    1.42    0.88
   6  13   0    1.18    0.62
   6  13   0    1.74    0.87
   6  13   0    0.12    0.66
   6  13   0    0.08    0.61
   6  13   0    1.15    0.60
   6  13   0    0.81    0.67
  -7 -13   0    0.32    0.90
  -7 -13   0    1.08    0.87
  -7 -13   0   -0.15    0.60
  -7 -13   0    0.72    0.79
  -7 -13   0    2.12    0.74
  -7 -13   0    0.81    0.64
  -7 -13   0    0.67    0.68
   7  13   0    0.76    0.68
   7  13   0    0.60    0.56
   7  13   0    0.80    0.58
   7  13   0    1.54    1.02
   7  13   0    1.98    0.75
   7  13   0    0.70    0.67
  -8 -13   0    1.76    0.96
  -8 -13   0    0.11    0.67
  -8 -13   0    0.55    0.60
  -8 -13   0    0.93    0.30
  -8 -13   0    0.90    0.70
  -8 -13   0    0.63    0.34
  -8 -13   0   -0.88    0.67
  -8 -13   0    0.64    0.91
  -8 -13   0   -0.16    0.71
   8  13   0    0.32    0.95
   8  13   0   -0.13    0.67
   8  13   0    1.28    0.68
   8  13   0    0.95    0.64
   8  13   0    0.63    0.57
   8  13   0    1.97    0.72
  -9 -13   0   -0.82    0.65
  -9 -13   0    0.80    0.98
  -9 -13   0    0.41    0.64
  -9 -13   0   -1.09    1.02
  -9 -13   0    0.65    0.72
  -9 -13   0   -1.47    0.69
  -9 -13   0   -0.12    0.58
  -9 -13   0    0.48    0.46
   9  13   0   -0.62    0.54
   9  13   0    1.61    0.69
   9  13   0   -0.25    0.65
   9  13   0    0.09    0.54
   9  13   0   -0.29    0.88
 -10 -13   0    1.48    0.56
 -10 -13   0    2.09    0.76
 -10 -13   0    2.00    0.59
 -10 -13   0    1.78    1.10
 -10 -13   0    1.89    1.06
 -10 -13   0    0.99    0.59
 -10 -13   0    0.99    0.77
 -10 -13   0    1.23    0.74
  10  13   0    1.77    0.86
  10  13   0    1.55    0.77
  10  13   0    1.30    1.00
  10  13   0    1.72    0.58
  10  13   0    2.54    0.80
 -11 -13   0    0.81    0.66
 -11 -13   0    1.13    1.14
 -11 -13   0    1.08    0.64
 -11 -13   0    0.03    0.78
 -11 -13   0    0.68    0.75
 -11 -13   0   -0.76    1.08
  11  13   0   -0.43    0.77
  11  13   0    0.20    0.81
  11  13   0    1.07    1.04
 -12 -13   0    0.27    1.19
 -12 -13   0   -0.54    1.20
 -12 -13   0    0.96    0.78
 -12 -13   0   -0.32    0.82
  12  13   0    1.02    0.83
  12  13   0    0.59    1.13
 -13 -13   0   -1.56    1.34
 -13 -13   0   -1.07    1.34
 -13 -13   0    0.22    0.90
 -13 -13   0    1.19    0.92
  13  13   0    1.15    0.88
  13  13   0    0.70    1.18
 -14 -13   0    0.36    0.95
 -14 -13   0    0.60    1.45
 -14 -13   0    0.16    1.46
  14  13   0    0.42    0.97
  14  13   0    0.21    1.36
 -15 -13   0    0.52    1.88
   8 -14   0    0.09    1.44
   8 -14   0    3.14    1.44
   8 -14   0    3.42    1.76
  -8  14   0    0.57    1.27
  -8  14   0    1.74    1.54
  -8  14   0    3.32    1.72
   7 -14   0    0.34    1.48
   7 -14   0    0.52    1.33
   7 -14   0    0.04    1.22
  -7  14   0   -0.06    1.10
  -7  14   0    2.28    1.45
  -7  14   0    1.57    1.64
   6 -14   0    1.61    1.34
   6 -14   0    1.29    1.24
   6 -14   0   -0.43    1.13
   6 -14   0   -0.59    1.17
  -6  14   0   -1.07    1.14
  -6  14   0   -1.03    1.30
  -6  14   0   -0.76    0.91
  -6  14   0   -0.30    0.92
  -6  14   0   -0.30    1.40
   5 -14   0    1.66    1.28
   5 -14   0    0.95    1.43
   5 -14   0   -0.10    1.10
   5 -14   0    0.88    1.21
   5 -14   0    1.11    1.09
  -5  14   0    1.97    1.20
  -5  14   0   -0.15    0.79
  -5  14   0    0.16    1.11
  -5  14   0   -0.61    1.14
  -5  14   0   -0.62    0.83
   4 -14   0    3.11    1.53
   4 -14   0    3.15    1.14
   4 -14   0    2.17    1.08
   4 -14   0    2.03    1.12
   4 -14   0    3.70    1.20
   4 -14   0    2.63    1.21
  -4  14   0    3.27    1.15
  -4  14   0   -0.62    1.30
  -4  14   0    4.08    1.22
  -4  14   0    3.61    0.92
  -4  14   0    2.70    0.75
  -4  14   0    5.32    1.23
   3 -14   0   -0.15    1.19
   3 -14   0   -0.42    0.93
   3 -14   0    2.89    1.00
   3 -14   0    2.34    1.11
   3 -14   0    0.72    0.95
   3 -14   0   -1.09    0.99
  -3  14   0    1.63    1.00
  -3  14   0    1.80    0.84
  -3  14   0    1.20    0.58
  -3  14   0   -0.30    0.93
  -3  14   0   -0.13    1.38
  -3  14   0   -0.31    1.04
   2 -14   0   -0.63    0.88
   2 -14   0   -0.29    0.90
   2 -14   0    0.20    1.07
   2 -14   0    0.53    0.93
  -2  14   0    0.25    0.77
  -2  14   0    1.28    0.94
  -2  14   0    0.29    0.96
  -2  14   0   -1.08    0.90
  -2  14   0   -0.73    0.46
  -2  14   0   -0.07    0.54
   1 -14   0    0.31    0.97
   1 -14   0    2.22    1.08
   1 -14   0    2.27    0.95
   1 -14   0    1.98    1.00
   1 -14   0    1.72    0.92
   1 -14   0    1.27    0.89
  -1  14   0    1.14    0.95
  -1  14   0    0.94    0.93
  -1  14   0    0.20    0.84
  -1  14   0    2.13    1.20
  -1  14   0    1.19    0.92
  -1  14   0    0.76    0.31
  -1  14   0    1.04    0.80
  -1  14   0    1.67    0.36
   0 -14   0    1.88    1.70
   0 -14   0   -1.37    0.87
   0 -14   0   -0.06    0.91
   0 -14   0    0.35    0.83
   0 -14   0    0.67    0.83
   0 -14   0    0.34    0.87
   0  14   0    1.07    1.04
   0  14   0    0.70    0.87
   0  14   0    0.78    0.75
   0  14   0   -0.43    0.87
   0  14   0   -0.70    0.89
   0  14   0   -1.25    0.88
  -1 -14   0    1.01    0.81
  -1 -14   0    1.85    0.86
  -1 -14   0   -0.29    0.80
  -1 -14   0   -0.23    0.83
  -1 -14   0    0.00    0.73
  -1 -14   0   -1.40    0.80
   1  14   0    0.65    0.84
   1  14   0    0.38    0.84
   1  14   0    0.65    0.82
   1  14   0    0.53    0.77
   1  14   0   -0.18    0.78
   1  14   0   -1.34    0.83
  -2 -14   0   21.14    1.57
  -2 -14   0   20.03    1.61
  -2 -14   0   20.15    1.68
  -2 -14   0   22.88    1.66
  -2 -14   0   16.50    1.63
  -2 -14   0   17.91    1.43
   2  14   0   19.64    1.56
   2  14   0   20.33    1.42
   2  14   0   20.64    1.46
   2  14   0   19.67    1.46
   2  14   0   22.62    1.66
   2  14   0   16.66    1.43
  -3 -14   0    2.64    0.84
  -3 -14   0    1.68    0.77
  -3 -14   0    1.75    0.91
  -3 -14   0    1.25    0.87
  -3 -14   0    0.95    0.81
  -3 -14   0    0.53    0.88
   3  14   0    3.41    0.91
   3  14   0    2.37    0.79
   3  14   0    2.04    0.83
   3  14   0    1.92    0.77
   3  14   0    1.07    0.85
  -4 -14   0    1.44    1.73
  -4 -14   0    0.94    0.82
  -4 -14   0    0.19    0.87
  -4 -14   0    2.38    0.82
  -4 -14   0    1.31    0.75
  -4 -14   0    0.68    0.74
  -4 -14   0    2.35    0.77
   4  14   0    0.48    0.72
   4  14   0    1.53    0.70
   4  14   0    2.01    0.77
   4  14   0    2.93    0.79
   4  14   0    0.47    0.71
  -5 -14   0    8.42    1.14
  -5 -14   0    8.13    1.03
  -5 -14   0    6.92    1.16
  -5 -14   0    7.59    0.96
  -5 -14   0    9.47    1.23
  -5 -14   0    7.43    0.95
  -5 -14   0    5.57    1.14
   5  14   0    7.16    1.17
   5  14   0    8.95    0.95
   5  14   0    9.27    1.25
   5  14   0    7.75    0.89
  -6 -14   0    1.00    0.73
  -6 -14   0   -0.44    0.93
  -6 -14   0   -0.13    0.81
  -6 -14   0    0.23    0.75
  -6 -14   0    0.09    0.71
  -6 -14   0    0.93    0.80
   6  14   0   -0.08    0.72
   6  14   0   -0.01    0.64
   6  14   0    1.26    0.88
   6  14   0    0.89    0.71
   6  14   0    0.91    0.74
   6  14   0    0.17    0.71
  -7 -14   0    3.43    0.86
  -7 -14   0    3.43    0.89
  -7 -14   0    2.68    0.75
  -7 -14   0    3.91    1.05
  -7 -14   0    2.73    0.98
  -7 -14   0    2.76    0.80
  -7 -14   0    4.24    0.84
   7  14   0    3.14    0.75
   7  14   0    4.11    0.99
   7  14   0    3.80    0.82
   7  14   0    4.30    0.89
   7  14   0    2.55    0.83
   7  14   0    3.17    0.73
  -8 -14   0    0.56    0.68
  -8 -14   0    0.29    0.83
  -8 -14   0    0.56    0.79
  -8 -14   0   -0.63    0.94
  -8 -14   0   -0.60    0.76
  -8 -14   0   -0.11    0.76
  -8 -14   0   -0.68    1.01
   8  14   0   -0.43    0.92
   8  14   0   -1.60    0.75
   8  14   0    0.19    0.65
   8  14   0    0.45    0.76
   8  14   0    0.16    0.70
   8  14   0   -0.37    0.60
  -9 -14   0    0.36    0.77
  -9 -14   0    0.15    0.79
  -9 -14   0    2.36    1.06
  -9 -14   0    0.06    0.76
  -9 -14   0   -0.52    0.64
  -9 -14   0   -1.55    1.18
  -9 -14   0    1.30    1.06
   9  14   0   -0.22    0.74
   9  14   0    0.03    0.85
   9  14   0   -1.20    0.96
   9  14   0    0.27    0.59
 -10 -14   0   -0.14    0.76
 -10 -14   0    0.48    0.84
 -10 -14   0    0.44    0.64
 -10 -14   0   -0.08    1.10
 -10 -14   0    0.48    0.64
 -10 -14   0    0.95    1.24
  10  14   0    0.64    1.07
  10  14   0    0.42    0.62
  10  14   0    0.05    0.77
 -11 -14   0   -0.34    1.15
 -11 -14   0   -0.22    0.81
 -11 -14   0   -0.21    1.28
  11  14   0    1.55    1.14
  11  14   0    1.88    0.85
 -12 -14   0    3.22    1.43
 -12 -14   0    1.40    1.26
 -12 -14   0   -0.51    0.86
  12  14   0   -0.22    1.16
  12  14   0   -0.66    0.88
 -13 -14   0    2.07    1.53
 -13 -14   0    1.15    0.96
 -13 -14   0    1.96    1.48
  13  14   0    2.55    1.35
  13  14   0   -0.51    0.91
 -14 -14   0   -0.19    1.63
 -14 -14   0    0.23    1.00
 -14 -14   0    0.81    1.51
  14  14   0   -0.45    1.01
  14  14   0    0.13    1.42
   7 -15   0   -0.18    1.47
   7 -15   0    1.27    1.37
  -7  15   0   -4.00    1.41
   6 -15   0    1.60    1.36
   6 -15   0    1.44    1.33
   6 -15   0   -1.67    2.20
  -6  15   0   -1.27    2.97
  -6  15   0    0.17    1.29
  -6  15   0    1.33    1.37
   5 -15   0    2.29    1.25
   5 -15   0   -0.78    1.27
   5 -15   0   -0.40    1.33
   5 -15   0    0.14    1.53
  -5  15   0   -1.92    1.74
  -5  15   0    0.05    0.99
  -5  15   0   -0.59    1.21
  -5  15   0   -0.74    1.28
  -5  15   0    0.13    0.99
   4 -15   0    0.37    1.35
   4 -15   0    1.00    1.12
   4 -15   0    1.86    1.38
   4 -15   0    1.53    1.16
   4 -15   0   -0.38    1.53
  -4  15   0    0.32    1.31
  -4  15   0    1.05    0.99
  -4  15   0   -1.06    0.74
  -4  15   0    2.31    1.25
  -4  15   0   -0.62    1.11
   3 -15   0    0.29    1.21
   3 -15   0   -1.51    1.03
   3 -15   0    0.50    1.24
   3 -15   0    0.24    1.03
   3 -15   0   -1.34    1.29
  -3  15   0    0.78    1.14
  -3  15   0    1.47    1.40
  -3  15   0    1.09    1.08
  -3  15   0   -1.24    0.89
  -3  15   0    0.23    0.61
   2 -15   0   -0.30    1.02
   2 -15   0   -0.78    1.00
   2 -15   0    1.50    1.10
   2 -15   0    0.91    1.09
   2 -15   0    0.40    0.92
  -2  15   0    0.29    0.60
  -2  15   0    0.46    1.07
  -2  15   0    1.47    1.15
  -2  15   0    0.52    0.91
  -2  15   0   -0.01    0.99
   1 -15   0    2.10    1.06
   1 -15   0    3.33    1.16
   1 -15   0    1.86    1.04
   1 -15   0    2.61    1.81
   1 -15   0    3.14    1.06
   1 -15   0    1.87    1.06
  -1  15   0    2.37    0.99
  -1  15   0    2.83    2.12
  -1  15   0    2.73    1.09
  -1  15   0    1.34    0.98
  -1  15   0    1.74    1.11
   0 -15   0    1.25    0.94
   0 -15   0   -1.69    0.98
   0 -15   0   -0.93    1.05
   0 -15   0    0.38    0.91
   0 -15   0   -0.26    0.90
   0  15   0   -0.12    0.90
   0  15   0   -0.21    1.09
   0  15   0   -0.79    0.94
  -1 -15   0    0.20    0.88
  -1 -15   0    1.04    1.06
  -1 -15   0    1.78    1.05
  -1 -15   0   -1.23    1.06
  -1 -15   0   -0.15    0.92
  -1 -15   0   -0.32    0.82
   1  15   0    1.01    1.63
   1  15   0    0.25    0.96
   1  15   0    1.15    0.96
   1  15   0   -0.75    0.84
   1  15   0    0.01    0.92
   1  15   0    1.86    0.90
  -2 -15   0    4.97    1.02
  -2 -15   0    3.93    1.10
  -2 -15   0    3.31    0.95
  -2 -15   0    4.37    1.10
   2  15   0    3.80    0.94
   2  15   0    4.00    1.72
   2  15   0    5.42    1.06
   2  15   0    3.83    0.99
   2  15   0    3.52    0.96
   2  15   0    5.13    1.04
  -3 -15   0    1.46    0.94
  -3 -15   0    0.46    0.87
  -3 -15   0   -1.65    1.22
  -3 -15   0   -0.59    0.82
  -3 -15   0   -0.95    0.91
   3  15   0    0.50    0.89
   3  15   0    0.35    0.84
   3  15   0   -0.14    0.79
   3  15   0    0.53    0.81
   3  15   0   -1.85    0.86
   3  15   0    1.62    0.95
  -4 -15   0   -0.48    0.83
  -4 -15   0    1.72    0.89
  -4 -15   0    0.64    1.01
  -4 -15   0    1.27    1.02
  -4 -15   0    0.54    0.82
  -4 -15   0    1.37    0.84
   4  15   0   -0.48    0.87
   4  15   0   -0.48    0.92
   4  15   0   -0.29    0.83
   4  15   0   -1.19    0.77
   4  15   0    0.51    0.91
   4  15   0   -0.23    0.78
  -5 -15   0    7.87    0.99
  -5 -15   0    7.47    1.27
  -5 -15   0    7.27    1.18
  -5 -15   0    8.56    1.13
  -5 -15   0    7.27    1.07
  -5 -15   0    7.54    1.06
   5  15   0    6.31    0.97
   5  15   0    7.43    1.09
   5  15   0    5.74    0.95
   5  15   0    7.89    1.06
   5  15   0    7.28    0.97
   5  15   0    6.83    1.16
  -6 -15   0    4.75    0.96
  -6 -15   0    5.65    0.92
  -6 -15   0    4.75    0.95
  -6 -15   0    5.96    1.21
  -6 -15   0    3.80    1.01
  -6 -15   0    4.88    0.97
  -6 -15   0    4.27    1.20
   6  15   0    4.30    0.85
   6  15   0    5.85    0.95
   6  15   0    4.68    1.09
   6  15   0    4.87    0.99
  -7 -15   0    0.46    1.01
  -7 -15   0   -0.56    1.04
  -7 -15   0    0.05    0.95
  -7 -15   0    0.73    0.83
  -7 -15   0    0.08    0.80
  -7 -15   0   -0.26    0.76
   7  15   0    0.06    0.79
   7  15   0   -0.77    1.02
   7  15   0   -0.18    0.78
   7  15   0   -0.21    0.72
  -8 -15   0    1.13    0.86
  -8 -15   0    0.78    1.02
  -8 -15   0   -0.77    1.04
  -8 -15   0    1.40    0.78
  -8 -15   0    1.61    1.47
   8  15   0    1.59    0.90
   8  15   0    1.86    0.76
   8  15   0    1.25    0.82
   8  15   0    0.81    1.05
  -9 -15   0    3.49    0.77
  -9 -15   0    2.66    1.22
  -9 -15   0    2.87    0.95
  -9 -15   0    3.41    1.24
   9  15   0    1.36    0.89
   9  15   0    2.64    1.20
   9  15   0    2.41    0.78
 -10 -15   0   -0.13    1.14
 -10 -15   0    0.88    0.84
 -10 -15   0    3.26    1.27
  10  15   0   -0.29    0.83
  10  15   0   -0.55    1.13
 -11 -15   0    0.67    0.96
 -11 -15   0    0.81    1.35
 -11 -15   0   -0.95    1.21
  11  15   0    0.88    1.22
  11  15   0   -0.85    0.87
 -12 -15   0    1.65    0.99
 -12 -15   0   -0.52    1.45
 -12 -15   0    0.58    1.43
  12  15   0    0.12    0.95
  12  15   0    0.28    1.33
 -13 -15   0   -1.77    1.52
 -13 -15   0    1.63    1.09
 -13 -15   0    2.67    1.72
  13  15   0   -1.65    1.40
  13  15   0    0.10    1.04
   6 -16   0    2.44    1.44
   6 -16   0    1.94    1.56
  -6  16   0   -1.79    1.53
   5 -16   0    4.10    1.44
   5 -16   0    0.01    1.96
   5 -16   0    3.26    1.47
  -5  16   0    0.73    1.39
  -5  16   0   -1.98    1.69
  -5  16   0   -1.33    2.01
   4 -16   0    1.99    1.34
   4 -16   0   -2.23    2.65
   4 -16   0    0.12    1.21
  -4  16   0    0.53    1.10
  -4  16   0    0.27    1.54
  -4  16   0    0.64    1.27
   3 -16   0    0.50    1.20
   3 -16   0    1.08    1.24
  -3  16   0   -1.61    1.21
  -3  16   0    0.26    1.02
  -3  16   0    0.87    1.38
   2 -16   0    1.16    1.24
   2 -16   0   -1.72    1.12
   2 -16   0    1.53    1.15
   2 -16   0    0.33    1.41
  -2  16   0   -0.31    1.00
  -2  16   0    1.71    1.15
   1 -16   0    0.45    1.15
   1 -16   0    1.82    1.08
   1 -16   0   -1.51    1.11
   1 -16   0    1.25    1.23
  -1  16   0   -0.10    1.07
  -1  16   0    0.92    1.03
  -1  16   0    1.06    1.39
   0 -16   0    3.56    1.26
   0 -16   0    3.42    1.19
   0 -16   0    3.83    1.18
   0 -16   0    3.45    1.19
   0  16   0    0.58    1.18
   0  16   0    5.10    1.15
   0  16   0    1.97    1.01
  -1 -16   0    2.85    1.14
  -1 -16   0    2.33    1.09
  -1 -16   0    1.04    1.07
  -1 -16   0    2.46    1.13
   1  16   0    2.85    1.06
   1  16   0    3.22    1.07
   1  16   0    3.25    1.14
  -2 -16   0    2.34    1.09
  -2 -16   0    2.16    1.13
  -2 -16   0    3.73    1.16
  -2 -16   0    4.04    1.06
   2  16   0    2.50    0.97
   2  16   0    3.26    1.05
   2  16   0    1.89    1.09
  -3 -16   0   -0.20    0.95
  -3 -16   0   -0.12    1.03
  -3 -16   0   -0.19    1.00
  -3 -16   0    0.57    0.99
   3  16   0    1.26    0.99
   3  16   0    0.39    0.87
   3  16   0    2.25    1.01
   3  16   0    0.46    0.98
  -4 -16   0    3.65    1.03
  -4 -16   0    3.52    1.20
  -4 -16   0    4.62    1.04
  -4 -16   0    7.58    1.29
   4  16   0    5.89    1.03
   4  16   0    4.08    1.13
   4  16   0    6.53    1.08
   4  16   0    4.38    1.23
  -5 -16   0    0.04    1.13
  -5 -16   0   -1.85    0.84
  -5 -16   0    1.85    1.11
  -5 -16   0    0.40    0.93
   5  16   0    0.88    1.03
   5  16   0    2.32    0.94
   5  16   0   -0.58    1.02
   5  16   0    0.35    0.81
  -6 -16   0   16.67    1.77
  -6 -16   0   13.11    1.55
  -6 -16   0   17.13    1.93
  -6 -16   0   16.47    2.09
   6  16   0   17.01    1.48
   6  16   0   18.08    1.77
   6  16   0   15.75    1.63
   6  16   0   15.84    1.76
  -7 -16   0    0.92    1.14
  -7 -16   0    0.90    1.23
  -7 -16   0   -0.37    0.90
  -7 -16   0    1.73    1.02
   7  16   0    0.96    1.11
   7  16   0    1.77    0.94
   7  16   0   -0.63    0.83
   7  16   0    0.18    0.87
  -8 -16   0    1.00    0.94
  -8 -16   0   -0.03    1.16
  -8 -16   0    1.94    1.02
  -8 -16   0    1.53    1.28
   8  16   0    2.36    0.90
   8  16   0    0.35    0.96
   8  16   0    2.36    1.17
  -9 -16   0   -1.37    1.22
  -9 -16   0   -0.01    0.96
  -9 -16   0   -0.27    1.22
   9  16   0   -0.44    0.93
   9  16   0    1.12    0.84
   9  16   0    1.16    1.28
 -10 -16   0    2.19    1.36
 -10 -16   0    1.39    1.36
 -10 -16   0    3.00    1.04
  10  16   0    1.82    1.03
  10  16   0    4.47    1.39
 -11 -16   0   -0.01    1.05
 -11 -16   0   -0.79    1.42
 -11 -16   0    0.85    1.46
  11  16   0   -2.39    1.25
  11  16   0    1.30    1.06
 -12 -16   0    0.06    1.49
 -12 -16   0    0.25    1.12
 -12 -16   0    5.80    1.71
  12  16   0   -1.07    1.07
  12  16   0   -1.14    1.43
   4 -17   0    0.60    1.44
   4 -17   0    1.14    1.50
   4 -17   0   -0.37    1.61
  -4  17   0    1.08    1.45
  -4  17   0    0.87    1.26
  -4  17   0    1.69    1.76
   3 -17   0   -0.17    1.36
   3 -17   0    0.19    1.54
   3 -17   0    3.08    1.41
  -3  17   0    0.20    1.20
  -3  17   0   -0.38    1.57
  -3  17   0    2.87    1.43
   2 -17   0   -0.94    1.48
   2 -17   0   -1.62    1.30
   2 -17   0    1.57    1.30
  -2  17   0    0.11    1.11
  -2  17   0    1.33    1.33
  -2  17   0    0.95    1.59
   1 -17   0   -1.69    1.21
   1 -17   0    2.48    1.25
   1 -17   0    1.26    1.38
  -1  17   0    2.04    1.49
  -1  17   0    1.79    1.27
  -1  17   0    1.19    1.17
   0 -17   0   -2.26    1.23
   0 -17   0    0.59    1.25
   0 -17   0   -0.12    1.16
   0 -17   0    1.08    1.25
   0  17   0    0.83    1.14
   0  17   0   -1.48    1.13
   0  17   0    0.61    1.33
  -1 -17   0   -0.52    1.22
  -1 -17   0    0.44    1.14
  -1 -17   0    1.94    1.18
  -1 -17   0    1.85    1.28
   1  17   0    1.99    1.12
   1  17   0   -0.49    1.09
   1  17   0    0.29    1.19
  -2 -17   0    0.40    1.16
  -2 -17   0    2.90    1.27
  -2 -17   0   -0.11    1.15
  -2 -17   0   -0.11    1.27
   2  17   0   -1.39    1.09
   2  17   0   -0.91    1.02
   2  17   0    2.85    1.10
  -3 -17   0    1.67    1.21
  -3 -17   0    1.19    1.26
  -3 -17   0    1.93    1.29
  -3 -17   0    2.42    1.22
   3  17   0   -0.10    1.11
   3  17   0    0.16    1.10
   3  17   0    3.79    1.04
  -4 -17   0    1.07    1.20
  -4 -17   0   -0.95    1.10
  -4 -17   0    0.45    1.27
  -4 -17   0    0.33    1.08
   4  17   0   -2.07    1.01
   4  17   0   -0.23    1.13
   4  17   0    0.55    1.02
  -5 -17   0    1.90    1.09
  -5 -17   0   -0.57    1.27
  -5 -17   0    3.54    1.16
  -5 -17   0    1.58    1.23
   5  17   0    2.23    1.22
   5  17   0    2.36    1.14
   5  17   0    1.91    1.10
   5  17   0    2.04    1.02
  -6 -17   0   -0.15    1.21
  -6 -17   0    1.54    1.36
  -6 -17   0   -0.37    1.08
  -6 -17   0    1.69    1.06
   6  17   0    1.18    1.18
   6  17   0    0.35    1.04
   6  17   0    0.21    0.95
   6  17   0    1.22    1.14
  -7 -17   0    3.26    1.40
  -7 -17   0    2.75    1.14
  -7 -17   0    6.85    1.51
  -7 -17   0    3.71    1.19
   7  17   0    2.65    1.13
   7  17   0    4.50    1.08
   7  17   0    1.21    1.23
  -8 -17   0    2.51    1.11
  -8 -17   0    0.44    1.09
  -8 -17   0    3.73    1.47
  -8 -17   0    2.88    1.44
   8  17   0    4.36    1.17
   8  17   0    1.73    1.34
   8  17   0    5.39    1.05
  -9 -17   0    0.88    1.47
  -9 -17   0    4.04    1.20
  -9 -17   0    3.82    1.50
   9  17   0    2.67    1.15
   9  17   0    5.35    1.45
 -10 -17   0    5.02    1.24
 -10 -17   0    3.80    1.60
 -10 -17   0    1.84    1.58
  10  17   0    3.10    1.45
  10  17   0    3.90    1.22
 -11 -17   0    0.51    1.19
 -11 -17   0    0.57    1.65
 -11 -17   0   -2.76    1.50
  11  17   0    0.34    1.14
  11  17   0    1.31    1.51
   3 -18   0    2.45    1.61
  -3  18   0    2.26    1.36
  -3  18   0    0.97    1.54
   2 -18   0    3.26    1.79
   2 -18   0    6.22    1.55
   2 -18   0   -0.44    1.52
  -2  18   0    3.91    1.58
  -2  18   0    2.63    1.34
  -2  18   0   -1.20    1.59
   1 -18   0    2.59    1.37
   1 -18   0    0.82    1.54
   1 -18   0   -0.46    1.44
  -1  18   0   -0.64    1.22
  -1  18   0    2.60    1.74
  -1  18   0    1.78    1.41
   0 -18   0    1.30    1.46
   0 -18   0    1.56    1.39
   0 -18   0   -2.64    1.32
   0  18   0    0.42    1.32
   0  18   0   -0.03    1.34
   0  18   0   -0.61    1.28
  -1 -18   0    0.47    1.34
  -1 -18   0   -2.50    1.36
  -1 -18   0    0.23    1.38
   1  18   0   -2.51    1.37
   1  18   0   -0.14    1.22
   1  18   0    1.77    1.23
  -2 -18   0   -3.01    1.27
  -2 -18   0    2.48    1.44
  -2 -18   0   -1.66    1.33
  -2 -18   0   -0.26    1.29
   2  18   0   -2.26    1.14
   2  18   0   -1.86    1.15
   2  18   0    0.76    1.11
  -3 -18   0    1.09    1.29
  -3 -18   0   -0.76    1.26
  -3 -18   0    1.98    1.39
  -3 -18   0    0.02    1.31
   3  18   0    0.60    1.16
   3  18   0   -0.46    1.22
   3  18   0    0.21    1.26
  -4 -18   0    0.20    1.42
  -4 -18   0    1.18    1.23
  -4 -18   0    2.85    1.38
  -4 -18   0    2.21    1.43
   4  18   0    1.83    1.14
   4  18   0    1.02    1.13
   4  18   0    2.91    1.26
  -5 -18   0    0.23    1.43
  -5 -18   0   -0.11    1.20
  -5 -18   0   -1.77    1.20
  -5 -18   0   -0.53    1.28
   5  18   0   -0.17    1.04
   5  18   0   -0.42    1.09
   5  18   0   -0.87    1.24
  -6 -18   0    3.34    1.55
  -6 -18   0    2.12    1.25
  -6 -18   0    1.04    1.26
  -6 -18   0    0.66    1.41
   6  18   0    0.99    1.35
   6  18   0   -1.14    1.12
   6  18   0    0.04    1.07
  -7 -18   0   -0.42    1.51
  -7 -18   0   -3.12    1.35
  -7 -18   0    1.01    1.23
  -7 -18   0    1.16    1.29
   7  18   0    0.82    1.36
   7  18   0   -1.65    1.05
   7  18   0    1.46    1.28
  -8 -18   0    1.11    1.23
  -8 -18   0   -0.35    1.43
  -8 -18   0    0.46    1.58
   8  18   0    0.75    1.42
   8  18   0    0.78    1.13
  -9 -18   0   -0.30    1.54
  -9 -18   0    0.79    1.22
  -9 -18   0   -1.72    1.68
   9  18   0    0.03    1.47
   9  18   0    2.18    1.31
 -10 -18   0    4.45    2.25
 -10 -18   0   -0.25    1.59
  10  18   0    1.39    1.58
  10  18   0   -0.27    1.87
   0 -19   0   -1.46    1.67
   0 -19   0    0.21    1.65
   0 -19   0    2.24    1.54
   0  19   0   -1.12    1.64
   0  19   0   -1.13    1.33
   0  19   0    3.32    1.48
  -1 -19   0   -3.98    1.53
  -1 -19   0   -0.39    1.57
  -1 -19   0    3.98    1.53
   1  19   0    1.86    1.46
   1  19   0    0.88    1.44
   1  19   0    0.68    1.38
  -2 -19   0   -0.14    1.44
  -2 -19   0    1.01    1.41
  -2 -19   0   -1.32    1.55
   2  19   0   -2.10    1.34
   2  19   0    1.24    1.31
   2  19   0   -0.47    1.41
  -3 -19   0   -1.49    1.50
  -3 -19   0    2.89    1.58
  -3 -19   0    2.10    1.51
   3  19   0    2.68    1.49
   3  19   0    2.63    1.51
   3  19   0   -1.17    1.24
  -4 -19   0   -2.06    1.40
  -4 -19   0    0.11    1.54
  -4 -19   0    1.16    1.46
  -4 -19   0   -0.01    1.49
   4  19   0   -0.07    1.38
   4  19   0    2.34    1.34
   4  19   0    0.12    1.39
  -5 -19   0    1.40    1.47
  -5 -19   0   -1.11    1.39
  -5 -19   0   -0.76    1.45
  -5 -19   0   -2.29    1.57
   5  19   0    1.87    1.47
   5  19   0   -0.56    1.26
   5  19   0   -0.96    1.22
  -6 -19   0    0.42    1.32
  -6 -19   0    2.75    1.72
  -6 -19   0    0.49    1.47
  -6 -19   0   -1.66    1.59
   6  19   0   -0.84    1.48
   6  19   0    0.36    1.27
   6  19   0    0.59    1.34
  -7 -19   0   -1.88    1.60
  -7 -19   0    1.24    1.36
  -7 -19   0    0.38    1.67
   7  19   0   -1.73    1.52
   7  19   0    2.21    1.94
   7  19   0   -2.52    1.26
   5  19  -1   -0.10    1.56
   5  19  -1   -0.71    1.39
   5  19  -1   -1.05    1.32
  -5 -19   1   -0.29    1.47
  -5 -19   1   -2.92    1.55
  -5 -19   1    0.13    1.54
  -5 -19   1   -1.17    1.52
   4  19  -1    4.25    1.54
   4  19  -1    0.86    1.33
  -4 -19   1    1.02    1.34
  -4 -19   1    5.52    1.74
  -4 -19   1    0.12    1.65
  -4 -19   1   -3.26    2.48
   3  19  -1    1.46    1.39
   3  19  -1   -0.42    1.39
   3  19  -1    0.18    1.39
  -3 -19   1   -0.68    1.52
  -3 -19   1   -0.23    1.37
  -3 -19   1   -1.39    1.54
   2  19  -1    0.69    1.50
   2  19  -1    2.89    1.48
   2  19  -1    0.33    1.37
  -2 -19   1    1.85    1.51
  -2 -19   1   -0.15    1.65
  -2 -19   1   -1.22    1.48
   1  19  -1    1.21    1.53
   1  19  -1    1.79    1.62
   1  19  -1   -0.68    1.40
  -1 -19   1   -1.57    1.47
  -1 -19   1    0.02    1.61
   9  18  -1   -0.59    1.61
  -9 -18   1   -0.69    1.68
   8  18  -1    2.50    1.57
   8  18  -1    0.14    1.21
  -8 -18   1   -0.91    1.53
  -8 -18   1    0.01    1.19
  -8 -18   1    3.30    1.81
   7  18  -1    0.57    1.22
   7  18  -1   -1.44    1.10
   7  18  -1    0.85    1.40
  -7 -18   1   -0.19    1.21
  -7 -18   1   -0.27    1.52
  -7 -18   1   -0.30    1.52
   6  18  -1    2.69    1.26
   6  18  -1    0.95    1.39
   6  18  -1    1.35    1.17
  -6 -18   1    0.10    1.19
  -6 -18   1   -2.85    1.50
  -6 -18   1   -2.23    1.38
  -6 -18   1   -2.81    1.30
   5  18  -1    1.97    1.20
   5  18  -1    0.21    1.10
   5  18  -1   -2.56    1.25
  -5 -18   1   -3.11    1.27
  -5 -18   1    1.31    1.37
  -5 -18   1    1.13    1.20
  -5 -18   1   -1.24    1.41
   4  18  -1    1.77    1.27
   4  18  -1    0.67    1.30
   4  18  -1    1.69    1.21
  -4 -18   1    1.73    1.46
  -4 -18   1    0.65    1.23
  -4 -18   1    1.66    1.33
  -4 -18   1    0.12    1.43
   3  18  -1    0.94    1.33
   3  18  -1   -0.44    1.12
   3  18  -1    4.54    1.48
  -3 -18   1    1.14    1.40
  -3 -18   1    1.29    1.38
  -3 -18   1   -3.52    1.33
  -3 -18   1    1.15    1.23
   2  18  -1    0.55    1.21
   2  18  -1   -0.75    1.29
   2  18  -1   -0.80    1.31
  -2 -18   1   -0.16    1.35
  -2 -18   1    2.11    1.34
  -2 -18   1    0.86    1.40
  -2 -18   1   -0.36    1.34
   1  18  -1    0.37    1.19
   1  18  -1    0.45    1.24
   1  18  -1    3.28    1.30
  -1 -18   1   -0.22    1.47
  -1 -18   1    1.72    1.36
  -1 -18   1    2.33    1.39
   0  18  -1    3.72    1.40
   0  18  -1    0.17    1.49
   0  18  -1    2.11    1.44
   0 -18   1    1.69    1.58
   0 -18   1    1.18    1.55
   0 -18   1    1.09    1.38
  -1  18  -1   -0.84    1.32
  -1  18  -1    3.18    1.56
  -1  18  -1    1.48    1.37
   1 -18   1    3.70    1.44
   1 -18   1   -1.67    1.50
   1 -18   1    0.24    1.53
  -2  18  -1    4.12    1.36
  -2  18  -1    3.14    1.54
  -2  18  -1    0.71    1.64
   2 -18   1    3.68    1.68
   2 -18   1    4.11    1.47
   2 -18   1   -0.88    1.58
  10  17  -1    0.76    1.15
  10  17  -1   -1.39    1.50
 -10 -17   1    0.47    1.15
 -10 -17   1   -2.73    1.51
 -10 -17   1   -2.05    1.51
   9  17  -1    1.73    1.45
   9  17  -1    0.88    1.14
  -9 -17   1    0.47    1.46
  -9 -17   1    1.60    1.49
  -9 -17   1    0.11    1.09
   8  17  -1    5.28    1.22
   8  17  -1    3.85    1.46
   8  17  -1    5.38    1.18
  -8 -17   1    5.50    1.59
  -8 -17   1    3.65    1.48
  -8 -17   1    5.89    1.23
   7  17  -1    1.98    1.10
   7  17  -1    3.34    1.11
   7  17  -1    3.02    1.32
  -7 -17   1    5.48    1.52
  -7 -17   1    3.42    1.19
  -7 -17   1    4.48    1.60
  -7 -17   1    3.80    1.16
   6  17  -1    0.02    1.18
   6  17  -1   -0.90    1.04
   6  17  -1    1.03    1.14
   6  17  -1   -1.61    1.15
  -6 -17   1   -1.10    1.25
  -6 -17   1    0.70    1.34
  -6 -17   1   -0.75    1.05
  -6 -17   1    0.65    1.10
   5  17  -1    0.96    1.02
   5  17  -1   -0.67    1.29
   5  17  -1   -0.32    1.00
   5  17  -1    0.41    1.13
  -5 -17   1   -0.24    1.28
  -5 -17   1   -0.41    1.10
  -5 -17   1    0.71    1.01
  -5 -17   1   -2.63    1.25
   4  17  -1    0.88    1.17
   4  17  -1    2.07    1.12
   4  17  -1    0.69    1.02
  -4 -17   1   -1.22    1.16
  -4 -17   1   -1.38    1.17
  -4 -17   1    0.12    1.32
  -4 -17   1   -0.46    1.09
   3  17  -1    0.80    1.08
   3  17  -1   -1.08    1.11
   3  17  -1    0.96    1.04
  -3 -17   1    0.25    1.18
  -3 -17   1   -0.40    1.29
  -3 -17   1    0.31    1.10
  -3 -17   1    1.96    1.31
   2  17  -1    2.42    1.15
   2  17  -1    0.31    1.03
   2  17  -1    1.88    1.16
  -2 -17   1    1.79    1.23
  -2 -17   1    1.32    1.29
  -2 -17   1    1.50    1.17
  -2 -17   1    0.82    1.17
   1  17  -1   -0.15    1.05
   1  17  -1    0.22    1.13
   1  17  -1    1.06    1.16
  -1 -17   1    0.95    1.24
  -1 -17   1    0.09    1.27
  -1 -17   1   -0.68    1.24
  -1 -17   1   -0.14    1.15
   0  17  -1    1.61    1.19
   0  17  -1    0.30    1.21
   0  17  -1    1.13    1.29
   0 -17   1   -2.22    1.31
   0 -17   1   -0.61    1.24
   0 -17   1    1.03    1.35
   0 -17   1    2.91    1.24
  -1  17  -1    1.72    1.21
  -1  17  -1   -0.59    1.16
  -1  17  -1   -1.33    1.20
   1 -17   1   -0.29    1.39
   1 -17   1    1.25    1.24
   1 -17   1   -1.82    1.34
  -2  17  -1    1.44    1.18
  -2  17  -1    1.08    1.22
  -2  17  -1    2.32    1.51
   2 -17   1    0.26    1.44
   2 -17   1    1.56    1.25
   2 -17   1   -3.35    1.31
  -3  17  -1   -0.28    1.22
  -3  17  -1    0.45    1.37
  -3  17  -1    1.44    1.53
   3 -17   1   -1.27    1.38
   3 -17   1   -0.52    1.37
   3 -17   1   -1.08    1.50
  -4  17  -1    2.59    1.32
  -4  17  -1   -0.77    1.42
  -4  17  -1    2.04    1.66
   4 -17   1    0.58    1.52
   4 -17   1   -2.12    1.53
   4 -17   1    4.35    1.48
  11  16  -1   -1.89    1.42
  11  16  -1   -0.63    1.01
 -11 -16   1    0.13    1.50
 -11 -16   1    0.47    1.02
 -11 -16   1    0.98    1.49
  10  16  -1    0.52    0.99
  10  16  -1    0.16    1.31
 -10 -16   1   -0.45    0.93
 -10 -16   1   -1.99    1.31
 -10 -16   1   -0.76    1.39
   9  16  -1   -0.19    0.95
   9  16  -1    0.80    1.49
   9  16  -1   -1.52    1.22
  -9 -16   1   -0.94    1.37
  -9 -16   1   -0.25    0.95
  -9 -16   1    1.00    1.26
   8  16  -1    1.28    0.91
   8  16  -1   -1.19    0.89
   8  16  -1   -0.26    1.22
  -8 -16   1    1.23    1.02
  -8 -16   1    0.74    1.23
  -8 -16   1    0.22    1.21
  -8 -16   1   -0.32    0.96
   7  16  -1   -0.58    0.97
   7  16  -1   -1.06    1.07
   7  16  -1    0.44    0.93
   7  16  -1   -0.27    1.03
  -7 -16   1   -0.47    0.93
  -7 -16   1   -0.86    1.10
  -7 -16   1    2.85    1.33
  -7 -16   1    0.94    0.95
   6  16  -1    1.79    0.99
   6  16  -1    3.17    0.96
   6  16  -1    1.23    1.16
   6  16  -1    3.11    1.02
  -6 -16   1    1.94    1.04
  -6 -16   1    2.25    1.02
  -6 -16   1    1.16    1.15
  -6 -16   1    0.53    1.27
   5  16  -1    0.47    1.04
   5  16  -1   -0.18    0.85
   5  16  -1   -0.55    0.92
   5  16  -1    1.14    1.01
  -5 -16   1   -0.10    1.12
  -5 -16   1    0.10    0.99
  -5 -16   1   -0.24    1.01
  -5 -16   1    0.07    1.23
   4  16  -1   -0.95    0.99
   4  16  -1    2.68    1.07
   4  16  -1   -1.07    1.50
   4  16  -1    1.48    1.00
  -4 -16   1    0.53    1.15
  -4 -16   1    3.15    0.98
  -4 -16   1    0.73    0.97
  -4 -16   1    1.72    1.10
   3  16  -1    0.67    1.08
   3  16  -1    0.78    1.03
   3  16  -1   -0.18    0.96
   3  16  -1    2.22    1.03
  -3 -16   1    1.17    1.04
  -3 -16   1   -0.99    1.06
  -3 -16   1    1.44    1.00
  -3 -16   1    0.83    1.07
   2  16  -1    1.23    1.01
   2  16  -1    2.57    1.01
   2  16  -1    3.95    1.16
  -2 -16   1    0.20    1.01
  -2 -16   1   -0.05    1.12
  -2 -16   1    0.86    1.09
  -2 -16   1    3.14    1.20
   1  16  -1   -0.93    1.04
   1  16  -1    0.66    0.98
   1  16  -1    1.24    1.03
  -1 -16   1    1.19    1.08
  -1 -16   1   -0.67    1.09
  -1 -16   1   -2.34    1.08
  -1 -16   1    0.90    1.10
   0  16  -1    0.19    1.10
   0  16  -1    0.08    1.01
   0  16  -1    2.41    1.17
   0 -16   1   -0.32    1.08
   0 -16   1    1.64    1.19
   0 -16   1    0.82    1.17
  -1  16  -1    3.08    1.12
  -1  16  -1    0.68    1.02
  -1  16  -1    0.43    1.11
   1 -16   1    2.27    1.13
   1 -16   1    2.26    1.21
   1 -16   1    1.67    1.21
   1 -16   1    2.31    1.31
  -2  16  -1    3.10    1.20
  -2  16  -1    1.50    1.09
  -2  16  -1    1.20    1.21
   2 -16   1    1.85    1.29
   2 -16   1   -0.97    1.17
   2 -16   1    1.61    1.29
   2 -16   1    1.58    1.19
  -3  16  -1    0.24    1.07
  -3  16  -1   -1.16    1.23
  -3  16  -1    0.68    1.18
   3 -16   1    1.32    1.32
   3 -16   1   -0.24    1.26
   3 -16   1    1.68    1.21
  -4  16  -1    2.31    1.37
  -4  16  -1   -1.39    1.07
  -4  16  -1    0.19    1.33
   4 -16   1    2.42    1.33
   4 -16   1   -1.10    1.30
   4 -16   1    0.39    1.31
  -5  16  -1    1.03    1.36
  -5  16  -1    4.20    1.69
  -5  16  -1   -2.02    1.11
   5 -16   1   -0.73    1.48
   5 -16   1   -0.46    1.94
   5 -16   1    2.47    1.36
  -6  16  -1    4.22    1.64
   6 -16   1   -1.50    1.46
   6 -16   1    3.20    1.51
  12  15  -1   -0.27    0.95
  12  15  -1    2.54    1.44
 -12 -15   1    0.26    1.44
 -12 -15   1   -1.00    1.40
 -12 -15   1   -1.12    0.93
  11  15  -1    0.83    0.89
  11  15  -1   -0.09    1.28
 -11 -15   1   -1.09    1.38
 -11 -15   1    0.12    0.93
 -11 -15   1   -1.48    1.34
  10  15  -1   -2.00    1.14
  10  15  -1    0.50    0.90
 -10 -15   1    1.04    1.33
 -10 -15   1    1.79    0.94
 -10 -15   1    1.12    1.29
   9  15  -1   -0.03    0.85
   9  15  -1   -0.46    0.79
   9  15  -1    0.09    1.13
  -9 -15   1    1.73    1.26
  -9 -15   1    1.02    0.86
  -9 -15   1    0.71    1.19
  -9 -15   1   -1.14    0.82
   8  15  -1   -0.13    0.78
   8  15  -1    1.11    1.12
   8  15  -1   -0.52    0.84
   8  15  -1   -0.29    0.85
  -8 -15   1    0.71    0.89
  -8 -15   1   -0.51    0.93
  -8 -15   1    1.47    1.14
  -8 -15   1    0.09    1.12
   7  15  -1   -0.33    0.85
   7  15  -1    0.31    0.81
   7  15  -1    1.29    1.09
   7  15  -1   -0.13    0.80
  -7 -15   1    0.33    1.13
  -7 -15   1    1.21    1.04
  -7 -15   1    1.06    1.01
  -7 -15   1    0.52    0.84
  -7 -15   1   -1.58    0.82
   6  15  -1   11.29    1.44
   6  15  -1    9.84    1.08
   6  15  -1    8.88    1.28
   6  15  -1    9.10    1.14
  -6 -15   1   10.09    1.13
  -6 -15   1    9.82    1.29
  -6 -15   1   11.80    1.49
  -6 -15   1    9.96    1.14
  -6 -15   1    9.99    1.17
   5  15  -1    0.86    1.48
   5  15  -1    0.28    0.77
   5  15  -1    0.71    0.83
   5  15  -1    1.04    0.99
   5  15  -1    3.06    0.94
  -5 -15   1   -0.92    1.02
  -5 -15   1    2.08    0.91
  -5 -15   1    1.80    0.91
  -5 -15   1    0.82    0.91
  -5 -15   1    0.24    0.96
   4  15  -1    0.42    0.96
   4  15  -1    0.43    0.99
   4  15  -1    0.80    0.88
   4  15  -1    3.20    0.92
   4  15  -1    2.34    0.83
  -4 -15   1   -0.22    0.94
  -4 -15   1    1.13    0.87
  -4 -15   1    1.95    1.04
  -4 -15   1    2.52    0.95
  -4 -15   1    0.30    1.10
  -4 -15   1    3.25    1.06
   3  15  -1   12.21    1.47
   3  15  -1   13.81    1.51
   3  15  -1    9.71    1.20
   3  15  -1   11.73    1.47
   3  15  -1   11.64    1.58
   3  15  -1   10.87    1.17
  -3 -15   1   10.09    1.77
  -3 -15   1   14.89    1.54
  -3 -15   1   12.36    1.58
  -3 -15   1   12.71    1.38
  -3 -15   1   12.12    1.36
  -3 -15   1   10.68    1.20
   2  15  -1    0.85    0.91
   2  15  -1   -1.34    0.96
   2  15  -1    1.91    0.98
   2  15  -1    1.43    1.32
   2  15  -1    1.28    0.88
  -2 -15   1    1.61    1.05
  -2 -15   1    0.59    0.98
  -2 -15   1    1.00    0.92
  -2 -15   1    0.67    0.94
  -2 -15   1   -0.81    0.87
   1  15  -1    2.91    1.10
   1  15  -1    2.71    0.94
   1  15  -1    2.57    0.92
   1  15  -1    1.15    0.99
   1  15  -1    2.12    0.94
  -1 -15   1    2.24    1.01
  -1 -15   1    2.76    1.17
  -1 -15   1    4.26    1.03
  -1 -15   1    2.79    0.93
  -1 -15   1    1.36    1.02
   0  15  -1   -0.47    0.88
   0  15  -1    1.18    1.00
   0  15  -1   -1.82    0.85
   0 -15   1   -1.68    1.05
   0 -15   1    0.52    1.03
   0 -15   1   -1.46    0.89
   0 -15   1    1.68    1.07
   0 -15   1   -0.28    1.06
  -1  15  -1    5.80    1.11
  -1  15  -1    4.53    1.37
  -1  15  -1    1.87    1.35
  -1  15  -1    5.74    1.11
   1 -15   1    3.97    1.06
   1 -15   1    5.09    1.19
   1 -15   1    5.11    1.21
   1 -15   1    3.18    1.19
  -2  15  -1   -1.25    1.00
  -2  15  -1    0.56    1.04
  -2  15  -1    1.21    1.14
  -2  15  -1   -0.64    0.99
   2 -15   1   -0.42    1.05
   2 -15   1   -1.49    1.14
   2 -15   1   -0.71    0.96
   2 -15   1   -1.46    1.04
   2 -15   1   -1.71    1.12
  -3  15  -1    1.64    1.10
  -3  15  -1    2.78    1.36
  -3  15  -1    1.29    1.17
   3 -15   1   -0.17    1.19
   3 -15   1    2.42    1.17
   3 -15   1    1.31    1.07
   3 -15   1   -0.23    1.40
   3 -15   1    0.88    1.16
  -4  15  -1    0.54    1.01
  -4  15  -1    1.14    1.16
  -4  15  -1   -0.76    1.38
   4 -15   1    0.92    1.24
   4 -15   1    2.32    1.17
   4 -15   1    1.69    1.35
  -5  15  -1    0.53    1.05
  -5  15  -1    0.31    1.28
  -5  15  -1    1.60    1.54
   5 -15   1    1.38    1.23
   5 -15   1   -0.99    1.22
   5 -15   1   -0.96    1.24
  -6  15  -1    0.79    1.40
  -6  15  -1    1.32    1.10
  -6  15  -1   -0.60    1.56
   6 -15   1    2.78    1.42
   6 -15   1    0.22    1.28
   6 -15   1    2.09    1.68
  -7  15  -1    0.37    1.45
   7 -15   1    0.50    1.43
   7 -15   1   -1.70    1.45
  13  14  -1   -0.63    0.91
  13  14  -1    2.36    1.39
 -13 -14   1    1.66    1.55
 -13 -14   1    1.20    1.53
 -13 -14   1    0.23    0.94
  12  14  -1    1.11    1.28
  12  14  -1   -0.14    0.87
 -12 -14   1   -0.53    1.35
 -12 -14   1   -1.36    1.36
 -12 -14   1   -0.91    0.82
  11  14  -1    0.88    1.21
  11  14  -1    0.12    0.81
 -11 -14   1    1.38    1.25
 -11 -14   1   -0.45    0.83
 -11 -14   1   -0.03    1.20
  10  14  -1    1.08    0.80
  10  14  -1   -0.47    1.10
  10  14  -1    1.51    0.73
 -10 -14   1    1.30    1.24
 -10 -14   1    1.36    1.02
 -10 -14   1   -0.52    0.78
 -10 -14   1    0.01    1.13
 -10 -14   1   -0.71    1.05
   9  14  -1   -0.24    0.75
   9  14  -1    1.56    1.00
   9  14  -1    0.45    0.75
   9  14  -1    1.41    1.06
   9  14  -1    0.11    0.67
  -9 -14   1    2.24    0.82
  -9 -14   1    0.18    0.72
  -9 -14   1    0.08    1.11
  -9 -14   1    1.01    1.17
  -9 -14   1   -0.08    0.82
  -9 -14   1    0.61    0.77
   8  14  -1    1.32    1.48
   8  14  -1    2.01    0.83
   8  14  -1    2.91    1.09
   8  14  -1    0.66    0.70
   8  14  -1    3.04    0.76
  -8 -14   1    2.82    0.82
  -8 -14   1    1.36    0.80
  -8 -14   1    3.09    1.12
  -8 -14   1    2.76    0.76
  -8 -14   1    1.33    0.88
  -8 -14   1    1.64    0.87
  -8 -14   1    3.51    1.22
   7  14  -1   -0.08    0.73
   7  14  -1    2.04    0.75
   7  14  -1    0.27    0.94
   7  14  -1   -0.12    0.75
   7  14  -1    0.81    0.77
   7  14  -1   -0.19    0.79
  -7 -14   1   -0.05    0.81
  -7 -14   1   -0.57    0.90
  -7 -14   1    0.44    0.80
  -7 -14   1   -1.73    0.68
  -7 -14   1   -0.40    0.74
  -7 -14   1    0.90    1.08
  -7 -14   1   -0.27    0.83
   6  14  -1    0.94    0.79
   6  14  -1    3.06    0.89
   6  14  -1    0.90    0.71
   6  14  -1    2.43    0.76
   6  14  -1    1.41    0.96
   6  14  -1    3.54    0.85
  -6 -14   1    1.94    0.81
  -6 -14   1    0.67    0.81
  -6 -14   1   -0.06    1.04
  -6 -14   1    2.73    0.81
  -6 -14   1    1.02    0.78
  -6 -14   1    1.64    1.00
  -6 -14   1    0.62    0.86
   5  14  -1    0.81    0.83
   5  14  -1    1.61    0.83
   5  14  -1    1.89    0.77
   5  14  -1    2.40    0.76
   5  14  -1    1.54    0.79
   5  14  -1    0.92    0.85
  -5 -14   1    0.98    1.04
  -5 -14   1    2.74    0.81
  -5 -14   1   -0.03    0.89
  -5 -14   1    1.69    0.79
  -5 -14   1    1.27    0.78
  -5 -14   1    1.62    0.84
  -5 -14   1    1.51    0.90
   4  14  -1    0.17    0.82
   4  14  -1    1.99    0.79
   4  14  -1    0.87    0.73
   4  14  -1    1.65    0.78
   4  14  -1    0.09    0.72
  -4 -14   1    1.31    1.03
  -4 -14   1   -0.41    0.79
  -4 -14   1   -0.23    0.85
  -4 -14   1    0.17    0.80
  -4 -14   1   -0.88    0.92
  -4 -14   1   -0.54    0.76
  -4 -14   1    0.87    0.74
   3  14  -1   29.29    2.62
   3  14  -1   32.76    1.66
   3  14  -1   31.88    1.68
   3  14  -1   30.10    2.90
   3  14  -1   30.56    1.73
   3  14  -1   33.90    1.66
  -3 -14   1   31.48    1.82
  -3 -14   1   30.22    1.73
  -3 -14   1   32.12    1.71
  -3 -14   1   34.10    1.74
  -3 -14   1   33.30    1.85
   2  14  -1    0.79    0.79
   2  14  -1    0.67    0.78
   2  14  -1   -0.62    0.73
   2  14  -1   -0.14    0.78
   2  14  -1    1.06    1.08
  -2 -14   1   -0.17    0.79
  -2 -14   1    0.91    0.82
  -2 -14   1    0.16    0.91
  -2 -14   1    0.62    0.90
  -2 -14   1    0.30    0.81
  -2 -14   1    2.39    0.83
   1  14  -1   -0.22    0.78
   1  14  -1   -0.31    0.72
   1  14  -1   -0.15    0.82
   1  14  -1   -0.69    0.81
   1  14  -1   -0.46    0.95
   1  14  -1   -1.24    0.82
  -1 -14   1    0.62    0.83
  -1 -14   1    0.79    1.04
  -1 -14   1    1.21    0.88
  -1 -14   1   -0.65    0.78
  -1 -14   1   -0.16    0.87
  -1 -14   1    0.36    0.88
   0  14  -1    0.81    0.82
   0  14  -1    0.37    0.89
   0  14  -1    1.79    0.82
   0  14  -1    0.33    0.91
   0  14  -1    0.71    1.43
   0  14  -1    0.74    0.80
   0 -14   1    1.51    1.06
   0 -14   1    1.60    0.88
   0 -14   1    2.87    1.03
   0 -14   1    1.50    0.96
   0 -14   1   -0.20    0.79
   0 -14   1    1.28    0.92
  -1  14  -1    4.89    1.16
  -1  14  -1    6.36    1.09
  -1  14  -1    4.64    1.13
  -1  14  -1    6.48    1.00
  -1  14  -1    5.89    1.04
   1 -14   1    6.21    1.09
   1 -14   1    7.09    1.27
   1 -14   1    4.16    1.13
   1 -14   1    7.14    1.04
   1 -14   1    6.55    1.16
   1 -14   1    4.82    1.07
  -2  14  -1    0.43    0.54
  -2  14  -1   -0.88    0.81
  -2  14  -1    0.11    1.05
  -2  14  -1    2.33    0.97
  -2  14  -1    0.28    0.37
  -2  14  -1    1.18    1.00
  -2  14  -1   -0.41    0.90
   2 -14   1    2.11    0.95
   2 -14   1   -0.29    0.97
   2 -14   1    1.04    1.02
   2 -14   1    1.51    1.25
   2 -14   1    0.83    1.04
   2 -14   1   -0.41    1.04
  -3  14  -1    0.81    0.85
  -3  14  -1   -1.58    1.17
  -3  14  -1    0.51    0.53
  -3  14  -1    2.32    1.12
  -3  14  -1    0.28    1.15
  -3  14  -1    0.20    1.03
   3 -14   1   -0.20    1.04
   3 -14   1    1.62    1.18
   3 -14   1    1.56    1.12
   3 -14   1    0.36    1.01
   3 -14   1    1.26    1.07
   3 -14   1    1.74    1.06
  -4  14  -1    1.76    1.05
  -4  14  -1    3.01    0.90
  -4  14  -1    2.46    1.20
  -4  14  -1    1.77    0.67
  -4  14  -1    1.44    1.09
   4 -14   1    0.11    1.06
   4 -14   1    2.70    1.13
   4 -14   1    2.40    1.13
   4 -14   1    1.21    1.05
   4 -14   1    0.33    1.19
  -5  14  -1   -0.42    1.39
  -5  14  -1   -0.75    0.88
  -5  14  -1   -0.42    1.23
  -5  14  -1    0.90    1.12
  -5  14  -1    1.59    0.78
   5 -14   1   -0.14    1.23
   5 -14   1    2.67    1.24
   5 -14   1   -0.99    1.30
   5 -14   1    1.96    1.09
   5 -14   1    0.73    1.16
  -6  14  -1    1.21    1.19
  -6  14  -1   -1.81    0.83
  -6  14  -1    1.75    1.21
  -6  14  -1   -0.25    1.46
  -6  14  -1   -0.91    0.90
   6 -14   1    0.06    1.51
   6 -14   1    0.25    1.19
   6 -14   1   -0.13    1.15
   6 -14   1    1.51    1.34
  -7  14  -1   -0.93    0.99
  -7  14  -1    0.54    1.35
  -7  14  -1    1.81    1.55
  -7  14  -1    1.10    2.17
  -7  14  -1    0.96    1.05
   7 -14   1    0.78    1.29
   7 -14   1    3.22    1.68
   7 -14   1    2.16    1.32
   7 -14   1   -0.25    1.51
  -8  14  -1   -2.54    2.16
  -8  14  -1   -0.06    1.43
   8 -14   1   -1.38    1.37
   8 -14   1   -0.22    1.33
  14  13  -1    2.47    1.42
  14  13  -1    0.99    1.01
 -14 -13   1    1.52    1.64
 -14 -13   1    0.98    0.95
 -14 -13   1    0.86    1.56
  13  13  -1    1.85    1.27
  13  13  -1   -0.82    0.87
 -13 -13   1   -1.47    1.37
 -13 -13   1   -1.50    0.81
 -13 -13   1   -2.10    1.25
  12  13  -1    0.56    1.21
  12  13  -1   -0.50    0.82
 -12 -13   1    0.91    0.87
 -12 -13   1   -0.74    1.21
 -12 -13   1    0.78    1.27
 -12 -13   1    1.42    0.79
  11  13  -1   -0.65    0.72
  11  13  -1   -1.29    1.07
 -11 -13   1    1.99    0.72
 -11 -13   1    0.06    0.78
 -11 -13   1    2.63    1.22
 -11 -13   1    0.70    0.78
 -11 -13   1    0.66    1.15
  10  13  -1   -0.26    0.82
  10  13  -1    0.17    0.71
  10  13  -1   -1.27    1.00
  10  13  -1   -0.73    0.61
  10  13  -1   -0.99    0.78
 -10 -13   1   -0.70    0.55
 -10 -13   1    0.77    0.62
 -10 -13   1   -0.68    1.05
 -10 -13   1   -0.37    1.11
 -10 -13   1   -0.08    0.76
 -10 -13   1    1.02    0.71
   9  13  -1   -0.28    0.58
   9  13  -1    1.82    0.99
   9  13  -1   -0.06    0.69
   9  13  -1    1.36    0.80
   9  13  -1    0.98    0.69
  -9 -13   1    0.95    0.51
  -9 -13   1    0.11    0.74
  -9 -13   1    1.79    0.67
  -9 -13   1   -0.12    0.97
  -9 -13   1    1.74    0.76
  -9 -13   1    0.78    0.99
  -9 -13   1   -0.40    0.65
  -9 -13   1    0.18    0.61
   8  13  -1    1.16    0.64
   8  13  -1    1.08    0.83
   8  13  -1    0.93    0.68
   8  13  -1   -0.17    0.64
   8  13  -1    0.91    0.70
   8  13  -1    1.19    0.98
  -8 -13   1   -1.37    0.84
  -8 -13   1   -0.16    0.94
  -8 -13   1    0.15    0.63
  -8 -13   1    0.87    0.71
  -8 -13   1   -0.77    0.74
  -8 -13   1   -0.22    0.72
  -8 -13   1    0.08    0.67
   7  13  -1   -0.73    0.63
   7  13  -1    0.73    0.67
   7  13  -1    2.59    0.79
   7  13  -1   -0.18    0.62
   7  13  -1    0.70    0.70
   7  13  -1    0.44    0.84
  -7 -13   1    1.84    0.67
  -7 -13   1    0.89    0.85
  -7 -13   1    1.13    0.78
  -7 -13   1    2.07    0.73
  -7 -13   1    1.69    0.96
  -7 -13   1    0.98    0.65
   6  13  -1   -0.31    0.66
   6  13  -1    0.17    0.60
   6  13  -1    0.12    0.64
   6  13  -1   -0.02    0.67
   6  13  -1    0.10    0.66
  -6 -13   1    0.15    0.79
  -6 -13   1    0.20    0.68
  -6 -13   1   -0.46    0.60
  -6 -13   1    0.98    0.77
  -6 -13   1   -1.05    0.60
  -6 -13   1    0.07    0.66
  -6 -13   1   -0.10    0.82
   5  13  -1    8.51    1.15
   5  13  -1    7.90    1.02
   5  13  -1    8.05    1.06
   5  13  -1    6.44    0.83
   5  13  -1    7.17    0.87
   5  13  -1    9.48    1.06
  -5 -13   1    8.13    1.07
  -5 -13   1    6.46    1.10
  -5 -13   1    7.16    0.85
  -5 -13   1    7.88    0.98
  -5 -13   1    7.18    0.82
  -5 -13   1    7.30    0.88
   4  13  -1    9.33    1.15
   4  13  -1   10.56    1.26
   4  13  -1    8.50    0.93
   4  13  -1   10.02    1.12
   4  13  -1    8.70    0.98
  -4 -13   1    7.87    1.11
  -4 -13   1    8.27    1.05
  -4 -13   1    9.20    1.02
  -4 -13   1    9.04    0.92
  -4 -13   1    8.02    1.07
  -4 -13   1    9.22    1.05
  -4 -13   1    8.13    0.98
   3  13  -1   12.61    1.17
   3  13  -1   11.82    1.17
   3  13  -1   13.30    1.20
   3  13  -1   11.86    1.30
   3  13  -1   12.63    1.31
   3  13  -1   11.71    1.22
  -3 -13   1    9.81    1.21
  -3 -13   1   11.15    1.36
  -3 -13   1   11.56    1.35
  -3 -13   1   10.88    1.20
  -3 -13   1   11.77    1.21
  -3 -13   1   11.13    1.22
  -3 -13   1   10.83    1.36
   2  13  -1   25.53    1.47
   2  13  -1   28.07    1.53
   2  13  -1   26.85    1.53
   2  13  -1   25.89    1.57
   2  13  -1   28.37    1.87
   2  13  -1   26.20    1.46
  -2 -13   1   25.22    1.62
  -2 -13   1   25.89    1.47
  -2 -13   1   27.23    1.50
  -2 -13   1   26.16    1.57
  -2 -13   1   28.49    1.61
  -2 -13   1   28.77    1.78
  -2 -13   1   27.55    1.66
   1  13  -1    1.10    0.69
   1  13  -1    0.66    0.75
   1  13  -1    0.97    0.93
   1  13  -1    1.86    0.76
   1  13  -1    0.95    0.77
   1  13  -1    1.13    0.78
   1  13  -1    0.76    0.79
  -1 -13   1    2.72    0.79
  -1 -13   1    0.69    0.83
  -1 -13   1    2.11    0.83
  -1 -13   1    2.24    0.81
  -1 -13   1    1.25    0.86
  -1 -13   1    2.71    0.81
   0  13  -1   13.15    1.37
   0  13  -1   15.86    1.35
   0  13  -1   15.13    1.37
   0  13  -1   11.99    1.41
   0  13  -1   13.15    1.23
   0  13  -1   14.06    1.37
   0 -13   1   11.92    1.43
   0 -13   1   12.76    1.36
   0 -13   1   11.84    1.40
   0 -13   1   14.07    1.41
   0 -13   1   10.80    1.38
   0 -13   1   12.76    1.41
  -1  13  -1    0.92    0.73
  -1  13  -1    0.40    0.78
  -1  13  -1   -1.53    0.63
  -1  13  -1   -0.40    0.80
  -1  13  -1    0.19    1.02
  -1  13  -1    1.37    0.84
   1 -13   1   -0.17    0.81
   1 -13   1    0.91    0.81
   1 -13   1   -0.98    0.71
   1 -13   1    0.21    0.71
   1 -13   1    1.47    0.96
   1 -13   1    0.53    0.83
  -2  13  -1   26.88    1.81
  -2  13  -1   26.30    0.93
  -2  13  -1   25.91    1.81
  -2  13  -1   25.83    1.70
  -2  13  -1   24.17    1.49
  -2  13  -1   29.17    1.81
  -2  13  -1   30.66    1.94
   2 -13   1   25.15    1.85
   2 -13   1   25.70    1.59
   2 -13   1   26.10    1.67
   2 -13   1   26.37    1.87
   2 -13   1   28.10    1.90
   2 -13   1   27.52    1.74
  -3  13  -1    1.61    0.54
  -3  13  -1    4.59    0.99
  -3  13  -1    2.27    1.04
  -3  13  -1    1.79    1.07
  -3  13  -1    2.21    0.78
  -3  13  -1    2.36    0.59
  -3  13  -1    1.56    0.90
   3 -13   1    2.89    0.91
   3 -13   1    1.38    0.86
   3 -13   1    1.63    1.15
   3 -13   1    2.32    0.91
   3 -13   1    3.07    0.98
  -4  13  -1    4.40    1.03
  -4  13  -1    3.91    0.88
  -4  13  -1    4.72    1.32
  -4  13  -1    4.19    0.76
  -4  13  -1    1.89    1.06
  -4  13  -1    5.11    1.30
  -4  13  -1    3.92    0.67
   4 -13   1    6.10    1.10
   4 -13   1    3.86    1.13
   4 -13   1    4.40    1.13
   4 -13   1    4.30    1.08
   4 -13   1    5.61    1.43
   4 -13   1    4.51    1.12
  -5  13  -1    1.88    1.01
  -5  13  -1    2.85    1.08
  -5  13  -1    2.58    1.07
  -5  13  -1    1.10    0.71
  -5  13  -1    2.90    1.11
  -5  13  -1    2.23    0.84
  -5  13  -1    5.40    1.49
   5 -13   1    1.89    1.01
   5 -13   1    1.14    1.22
   5 -13   1    1.31    1.08
   5 -13   1    1.20    1.16
   5 -13   1    0.78    1.05
   5 -13   1    3.58    1.50
   5 -13   1    1.65    1.13
  -6  13  -1   -1.63    1.05
  -6  13  -1    2.01    0.87
  -6  13  -1    0.36    0.83
  -6  13  -1    1.60    1.21
  -6  13  -1    0.98    1.34
   6 -13   1    0.90    1.07
   6 -13   1    2.13    1.14
   6 -13   1   -0.14    1.24
   6 -13   1    2.19    1.08
   6 -13   1   -0.63    1.14
   6 -13   1   -0.37    1.01
  -7  13  -1   -0.72    1.36
  -7  13  -1    1.76    1.01
  -7  13  -1    1.94    1.31
  -7  13  -1   -1.19    1.13
  -7  13  -1   -0.35    0.84
   7 -13   1    0.92    1.16
   7 -13   1    2.78    1.36
   7 -13   1    1.19    1.14
   7 -13   1    0.81    1.28
  -8  13  -1    0.02    1.15
  -8  13  -1    0.74    1.64
  -8  13  -1   -0.03    1.29
   8 -13   1    1.77    1.57
   8 -13   1   -0.33    1.24
   8 -13   1   -0.62    1.28
  -9  13  -1    1.29    1.36
  -9  13  -1    0.67    1.42
  -9  13  -1    2.62    1.91
   9 -13   1    1.23    1.53
   9 -13   1    2.19    1.48
   9 -13   1    3.40    1.35
 -10  13  -1    2.16    1.83
 -10  13  -1    1.54    1.55
  10 -13   1    0.04    1.63
  10 -13   1   -0.75    2.12
  14  12  -1    0.21    0.94
  14  12  -1    0.88    1.32
 -14 -12   1   -0.87    1.31
 -14 -12   1   -0.59    1.49
 -14 -12   1    1.87    1.58
 -14 -12   1    1.79    0.90
  13  12  -1    0.71    1.17
  13  12  -1   -0.56    0.81
 -13 -12   1   -1.72    1.31
 -13 -12   1    0.45    1.28
 -13 -12   1   -0.69    0.93
 -13 -12   1    0.34    0.81
  12  12  -1    1.95    0.76
  12  12  -1    0.01    1.07
  12  12  -1    0.94    0.84
 -12 -12   1    1.42    1.29
 -12 -12   1    0.31    1.15
 -12 -12   1   -1.33    0.71
 -12 -12   1    0.90    0.84
 -12 -12   1    0.29    0.78
  11  12  -1    1.61    0.74
  11  12  -1   -0.77    0.66
  11  12  -1    1.00    1.01
 -11 -12   1    1.05    0.76
 -11 -12   1    1.70    0.71
 -11 -12   1    1.57    0.74
 -11 -12   1    0.06    0.57
 -11 -12   1   -0.28    1.13
 -11 -12   1    1.39    0.58
 -11 -12   1    0.52    1.12
  10  12  -1   -0.10    0.66
  10  12  -1    0.73    0.96
  10  12  -1    0.69    0.64
 -10 -12   1   -1.15    0.88
 -10 -12   1   -1.05    0.58
 -10 -12   1   -0.80    0.53
 -10 -12   1    0.63    0.68
 -10 -12   1    0.57    0.53
 -10 -12   1    0.40    0.67
 -10 -12   1   -0.27    0.73
 -10 -12   1   -0.95    0.65
 -10 -12   1    1.32    0.98
 -10 -12   1   -0.05    0.57
   9  12  -1   -0.36    0.62
   9  12  -1    0.75    0.56
   9  12  -1   -0.09    0.66
   9  12  -1    0.10    0.60
  -9 -12   1    0.38    0.57
  -9 -12   1    1.06    0.90
  -9 -12   1    0.42    0.65
  -9 -12   1    0.54    0.57
  -9 -12   1   -0.10    0.60
  -9 -12   1   -0.07    0.91
  -9 -12   1   -0.23    0.54
  -9 -12   1    0.22    0.48
  -9 -12   1    0.27    0.57
  -9 -12   1    0.79    0.66
   8  12  -1   -0.16    0.59
   8  12  -1    0.04    0.55
   8  12  -1    0.54    0.56
   8  12  -1    2.35    0.90
   8  12  -1   -0.08    0.68
   8  12  -1   -0.64    0.61
  -8 -12   1    0.08    0.58
  -8 -12   1   -0.76    0.86
  -8 -12   1    0.45    0.66
  -8 -12   1   -0.23    0.55
  -8 -12   1   -0.62    0.61
  -8 -12   1   -0.30    0.56
  -8 -12   1   -0.19    0.44
  -8 -12   1   -0.83    0.88
   7  12  -1    2.83    0.63
   7  12  -1    1.02    0.54
   7  12  -1    0.88    0.63
   7  12  -1   -0.18    0.81
  -7 -12   1   -0.18    0.64
  -7 -12   1    1.12    0.59
  -7 -12   1   -1.29    0.74
  -7 -12   1    1.44    0.59
   6  12  -1   -0.14    0.52
   6  12  -1    0.16    0.57
   6  12  -1   -0.17    0.55
   6  12  -1    0.19    0.58
   6  12  -1    0.65    0.56
   6  12  -1   -0.69    0.70
  -6 -12   1   -0.14    0.59
  -6 -12   1   -0.20    0.57
  -6 -12   1   -0.19    0.56
  -6 -12   1    1.28    0.79
  -6 -12   1    0.27    0.66
  -6 -12   1    0.65    0.85
  -6 -12   1    0.16    0.55
   5  12  -1   -0.06    0.86
   5  12  -1    1.42    0.61
   5  12  -1    0.55    0.57
   5  12  -1    1.05    0.63
   5  12  -1    0.48    0.55
   5  12  -1   -0.77    0.73
   5  12  -1    1.30    0.59
  -5 -12   1    0.98    0.59
  -5 -12   1    0.02    0.76
  -5 -12   1    0.82    0.69
  -5 -12   1    0.75    0.71
  -5 -12   1    1.10    0.66
  -5 -12   1    0.29    0.55
  -5 -12   1    1.03    0.58
   4  12  -1    1.14    0.62
   4  12  -1    0.40    0.55
   4  12  -1    0.61    0.72
   4  12  -1    0.61    0.57
   4  12  -1   -0.24    0.55
   4  12  -1   -0.23    0.73
   4  12  -1    1.23    0.62
  -4 -12   1    0.28    0.60
  -4 -12   1   -0.09    0.76
  -4 -12   1   -0.58    0.53
  -4 -12   1    0.13    0.58
  -4 -12   1    0.45    0.67
  -4 -12   1    0.46    0.66
  -4 -12   1   -0.33    0.55
   3  12  -1    2.02    0.70
   3  12  -1    1.18    0.60
   3  12  -1    0.15    0.55
   3  12  -1    1.46    0.58
   3  12  -1    1.75    0.62
   3  12  -1   -0.70    0.71
   3  12  -1    0.28    0.59
  -3 -12   1    0.79    0.60
  -3 -12   1    1.34    0.62
  -3 -12   1    0.61    0.68
  -3 -12   1   -0.50    0.74
  -3 -12   1    1.00    0.68
  -3 -12   1   -0.82    0.63
  -3 -12   1    0.16    0.70
   2  12  -1    9.69    1.02
   2  12  -1    8.26    0.97
   2  12  -1    9.01    1.17
   2  12  -1    8.28    0.85
   2  12  -1    8.45    0.88
   2  12  -1    8.80    0.93
  -2 -12   1    8.35    1.01
  -2 -12   1    9.48    0.99
  -2 -12   1    7.99    0.93
  -2 -12   1    9.86    1.22
  -2 -12   1    8.74    1.18
  -2 -12   1    8.40    1.06
  -2 -12   1    7.50    0.87
   1  12  -1   -0.12    0.72
   1  12  -1    1.29    0.63
   1  12  -1   -0.03    0.71
   1  12  -1    2.12    0.69
   1  12  -1    2.37    0.69
   1  12  -1    0.94    0.69
   1  12  -1    1.08    0.66
   1  12  -1    1.76    0.69
  -1 -12   1    0.92    0.73
  -1 -12   1    1.51    0.73
  -1 -12   1    0.23    0.75
  -1 -12   1    1.97    0.71
  -1 -12   1    1.40    0.68
  -1 -12   1    0.13    0.75
  -1 -12   1    0.83    0.70
  -1 -12   1    0.26    0.72
   0  12  -1    1.81    0.86
   0  12  -1    2.04    0.75
   0  12  -1    2.50    0.78
   0  12  -1    3.15    0.74
   0  12  -1    3.21    0.85
   0  12  -1    1.64    0.73
   0  12  -1    2.15    0.69
   0  12  -1    2.30    0.80
   0 -12   1    3.14    0.81
   0 -12   1    0.98    0.69
   0 -12   1    2.00    0.79
   0 -12   1    2.85    0.70
   0 -12   1    3.50    0.83
   0 -12   1    2.51    0.82
   0 -12   1    3.07    0.85
  -1  12  -1    2.27    0.82
  -1  12  -1    3.07    0.33
  -1  12  -1    2.80    0.89
  -1  12  -1    2.61    0.77
  -1  12  -1    1.56    0.83
  -1  12  -1    2.06    0.83
  -1  12  -1    2.24    1.11
  -1  12  -1    2.76    0.83
  -1  12  -1    3.09    0.29
  -1  12  -1    3.05    0.72
   1 -12   1    1.37    0.72
   1 -12   1    3.00    0.88
   1 -12   1    2.27    0.76
   1 -12   1    2.70    0.89
   1 -12   1    2.79    0.90
   1 -12   1    2.02    0.98
   1 -12   1    1.82    0.86
   1 -12   1    2.30    0.76
  -2  12  -1    3.39    0.47
  -2  12  -1    2.96    0.86
  -2  12  -1    7.61    1.40
  -2  12  -1    4.11    0.99
  -2  12  -1    2.98    0.75
  -2  12  -1    3.10    0.88
  -2  12  -1    1.17    0.83
  -2  12  -1    8.18    1.54
  -2  12  -1    3.68    0.85
   2 -12   1    3.90    0.96
   2 -12   1    3.03    0.80
   2 -12   1    3.37    0.86
   2 -12   1    3.53    0.90
   2 -12   1    2.53    0.77
   2 -12   1    3.73    0.86
   2 -12   1    3.87    0.88
   2 -12   1    3.14    1.16
  -3  12  -1    0.44    0.47
  -3  12  -1   -0.32    0.89
  -3  12  -1    0.51    0.73
  -3  12  -1   -0.54    0.59
  -3  12  -1    0.45    0.77
  -3  12  -1   -0.51    0.50
  -3  12  -1   -0.93    0.84
  -3  12  -1   -1.14    0.75
  -3  12  -1    0.41    1.02
   3 -12   1   -0.77    0.89
   3 -12   1   -1.00    0.71
   3 -12   1   -0.59    0.80
   3 -12   1   -0.95    0.89
   3 -12   1    0.10    0.75
   3 -12   1    0.20    1.14
   3 -12   1   -0.34    0.71
   3 -12   1    0.32    0.77
  -4  12  -1    1.90    0.92
  -4  12  -1    2.19    1.06
  -4  12  -1   -0.40    0.86
  -4  12  -1    1.64    0.93
  -4  12  -1    1.21    0.92
  -4  12  -1    0.34    0.70
  -4  12  -1    0.37    0.62
  -4  12  -1    1.98    1.13
  -4  12  -1    0.59    0.55
   4 -12   1    2.87    1.08
   4 -12   1   -0.16    0.78
   4 -12   1    0.16    0.82
   4 -12   1    0.53    0.84
   4 -12   1    0.43    0.87
   4 -12   1    1.13    0.81
   4 -12   1   -0.04    0.88
   4 -12   1    0.58    0.82
  -5  12  -1   -0.45    0.62
  -5  12  -1   -1.23    1.00
  -5  12  -1   -0.04    0.87
  -5  12  -1    0.58    0.77
  -5  12  -1    1.89    0.91
  -5  12  -1    1.09    1.00
  -5  12  -1   -0.54    1.00
  -5  12  -1   -1.03    0.65
   5 -12   1   -1.41    1.74
   5 -12   1    1.08    0.93
   5 -12   1   -0.23    0.94
   5 -12   1    0.26    0.83
   5 -12   1    0.49    1.00
   5 -12   1    0.01    1.27
   5 -12   1    0.93    0.87
  -6  12  -1    1.22    0.97
  -6  12  -1    0.39    0.89
  -6  12  -1   -1.02    1.05
  -6  12  -1   -0.81    1.58
  -6  12  -1    0.98    1.65
  -6  12  -1   -0.13    0.74
  -6  12  -1   -1.52    1.17
  -6  12  -1   -0.46    0.69
   6 -12   1   -0.46    1.15
   6 -12   1    0.86    1.26
   6 -12   1    1.32    1.07
   6 -12   1   -0.73    1.22
   6 -12   1    1.30    1.00
   6 -12   1    1.32    1.00
   6 -12   1   -1.18    1.11
   6 -12   1   -1.33    0.81
  -7  12  -1   -1.31    1.27
  -7  12  -1    0.53    0.72
  -7  12  -1   -0.55    1.08
  -7  12  -1   -1.59    0.81
  -7  12  -1   -0.15    1.23
  -7  12  -1    0.96    1.19
   7 -12   1    1.29    1.09
   7 -12   1   -0.17    1.19
   7 -12   1    1.16    1.04
   7 -12   1   -1.44    0.99
   7 -12   1    0.20    1.06
  -8  12  -1    0.83    1.39
  -8  12  -1   -1.41    1.16
  -8  12  -1    3.08    1.30
  -8  12  -1   -1.22    0.95
   8 -12   1   -0.86    1.32
   8 -12   1    0.81    1.09
   8 -12   1    3.04    1.29
   8 -12   1    1.22    1.19
   8 -12   1   -0.12    1.27
   8 -12   1   -0.48    0.69
  -9  12  -1    1.18    1.74
  -9  12  -1    2.13    1.37
  -9  12  -1   -0.09    1.16
   9 -12   1    1.53    1.31
   9 -12   1    1.46    1.25
   9 -12   1   -0.06    1.57
 -10  12  -1    0.60    1.43
 -10  12  -1    1.12    1.68
 -10  12  -1    0.15    1.36
  10 -12   1    2.45    1.58
  10 -12   1    3.67    1.40
  10 -12   1    3.35    1.56
  15  11  -1   -1.43    0.91
  15  11  -1    0.66    1.62
  15  11  -1   -0.59    1.36
 -15 -11   1   -0.45    0.90
 -15 -11   1    0.05    1.30
 -15 -11   1    1.49    1.63
  14  11  -1   -0.34    1.34
  14  11  -1    0.68    1.23
  14  11  -1   -0.99    0.80
 -14 -11   1    2.59    1.48
 -14 -11   1   -0.21    0.80
 -14 -11   1   -0.16    1.30
 -14 -11   1    1.82    1.27
  13  11  -1   -0.21    1.03
  13  11  -1    0.03    0.77
  13  11  -1    0.36    1.19
 -13 -11   1    0.76    1.29
 -13 -11   1   -0.18    0.73
 -13 -11   1    0.58    0.76
 -13 -11   1    0.80    0.96
 -13 -11   1    1.58    1.26
  12  11  -1    0.16    0.73
  12  11  -1    0.88    0.70
  12  11  -1    1.47    1.04
 -12 -11   1    1.05    1.10
 -12 -11   1   -0.80    1.09
 -12 -11   1    0.74    0.68
 -12 -11   1    0.68    0.70
 -12 -11   1   -0.20    0.82
  11  11  -1    0.90    0.66
  11  11  -1   -0.63    0.66
 -11 -11   1   -0.80    0.94
 -11 -11   1   -0.18    0.46
 -11 -11   1    0.03    0.52
 -11 -11   1    1.12    0.64
 -11 -11   1    0.27    0.63
 -11 -11   1   -1.15    0.70
 -11 -11   1    0.48    1.07
 -11 -11   1    0.50    0.50
 -11 -11   1   -1.43    0.87
  10  11  -1    2.31    0.59
  10  11  -1    2.29    0.66
  10  11  -1    2.29    0.91
  10  11  -1    2.61    0.69
 -10 -11   1    2.67    0.78
 -10 -11   1    2.35    0.50
 -10 -11   1    2.41    0.57
 -10 -11   1    2.06    0.66
 -10 -11   1    1.82    0.99
 -10 -11   1    0.85    0.92
 -10 -11   1    3.20    0.62
 -10 -11   1    2.20    0.64
 -10 -11   1    4.05    0.59
 -10 -11   1    2.88    0.68
   9  11  -1   -0.11    0.54
   9  11  -1    1.06    0.49
   9  11  -1    0.03    0.61
   9  11  -1    0.43    0.82
   9  11  -1    0.83    0.54
  -9 -11   1    0.44    0.83
  -9 -11   1    0.95    0.58
  -9 -11   1    0.65    0.48
  -9 -11   1    0.09    0.51
  -9 -11   1    0.46    0.59
  -9 -11   1    0.65    0.59
  -9 -11   1    0.84    0.50
  -9 -11   1    1.19    0.57
  -9 -11   1    0.78    0.46
   8  11  -1    0.74    0.48
   8  11  -1    0.97    0.60
   8  11  -1    0.17    0.76
   8  11  -1    0.81    0.52
   8  11  -1    0.44    0.59
   8  11  -1    1.26    0.50
  -8 -11   1    1.30    0.52
  -8 -11   1    1.91    0.50
  -8 -11   1    0.51    0.43
  -8 -11   1    1.96    0.58
  -8 -11   1    0.55    0.57
  -8 -11   1    1.05    0.46
  -8 -11   1    0.82    0.95
  -8 -11   1    1.12    0.82
  -8 -11   1    1.48    0.65
   7  11  -1    0.17    0.56
   7  11  -1   -0.07    0.52
   7  11  -1    0.12    0.47
   7  11  -1   -0.33    0.48
   7  11  -1    0.08    0.49
   7  11  -1    1.49    0.73
  -7 -11   1    0.09    0.35
  -7 -11   1   -0.24    0.32
  -7 -11   1    0.46    0.53
  -7 -11   1   -0.30    0.49
  -7 -11   1    0.15    0.48
  -7 -11   1    0.09    0.73
  -7 -11   1    0.11    0.52
  -7 -11   1    0.32    0.79
  -7 -11   1    0.03    0.89
   6  11  -1   -0.13    0.51
   6  11  -1    0.72    0.72
   6  11  -1    0.76    0.51
   6  11  -1   -0.05    0.49
   6  11  -1    1.41    0.85
   6  11  -1    0.90    0.54
   6  11  -1    0.14    0.48
  -6 -11   1    0.29    0.73
  -6 -11   1    1.06    0.55
  -6 -11   1    1.37    0.55
  -6 -11   1    0.80    0.51
  -6 -11   1    0.38    0.52
  -6 -11   1   -0.11    0.64
  -6 -11   1    0.76    0.50
   5  11  -1    0.12    0.64
   5  11  -1    0.34    0.73
   5  11  -1    0.04    0.46
   5  11  -1    0.47    0.49
   5  11  -1    0.32    0.54
   5  11  -1   -0.49    0.46
  -5 -11   1    0.77    0.51
  -5 -11   1    0.68    0.53
  -5 -11   1   -0.70    0.65
  -5 -11   1    0.48    0.64
  -5 -11   1    0.20    0.51
  -5 -11   1    0.07    0.50
  -5 -11   1    0.74    0.59
   4  11  -1    0.20    0.50
   4  11  -1    0.22    0.48
   4  11  -1    0.13    0.70
   4  11  -1    0.19    0.60
   4  11  -1    0.73    0.54
   4  11  -1    0.21    0.61
   4  11  -1   -0.01    0.51
   4  11  -1    0.07    0.51
  -4 -11   1    0.07    0.51
  -4 -11   1    0.03    0.51
  -4 -11   1   -0.14    0.47
  -4 -11   1   -0.47    0.57
  -4 -11   1   -0.04    0.51
  -4 -11   1   -0.48    0.72
  -4 -11   1   -0.67    0.48
  -4 -11   1   -0.86    0.59
  -4 -11   1   -0.04    0.57
   3  11  -1    2.08    0.56
   3  11  -1    1.52    0.55
   3  11  -1    2.63    0.59
   3  11  -1    1.74    0.60
   3  11  -1    2.08    0.71
   3  11  -1    2.84    0.64
   3  11  -1    2.40    0.73
  -3 -11   1    2.93    0.60
  -3 -11   1    1.55    0.56
  -3 -11   1    2.45    0.65
  -3 -11   1    2.42    0.61
  -3 -11   1    1.84    0.87
  -3 -11   1    2.52    0.74
  -3 -11   1    1.20    0.64
  -3 -11   1    1.70    0.56
  -3 -11   1    2.69    0.77
  -3 -11   1    2.48    0.70
   2  11  -1   15.38    1.24
   2  11  -1   13.89    1.04
   2  11  -1   13.03    1.05
   2  11  -1   12.76    1.03
   2  11  -1   13.46    1.10
   2  11  -1   14.55    1.15
   2  11  -1   13.19    1.11
   2  11  -1   14.29    1.14
  -2 -11   1   13.49    1.14
  -2 -11   1   15.22    1.11
  -2 -11   1   12.83    1.12
  -2 -11   1   10.85    1.00
  -2 -11   1   13.53    1.19
  -2 -11   1   13.92    1.15
  -2 -11   1   14.14    1.15
  -2 -11   1   14.15    1.02
  -2 -11   1   11.55    1.03
   1  11  -1   15.60    1.17
   1  11  -1   13.42    1.18
   1  11  -1   12.50    1.29
   1  11  -1   14.73    1.12
   1  11  -1   13.83    1.15
   1  11  -1   16.00    1.19
   1  11  -1   16.85    1.10
   1  11  -1   16.71    1.13
   1  11  -1   17.26    1.14
  -1 -11   1   14.48    1.21
  -1 -11   1   15.27    1.18
  -1 -11   1   17.27    1.22
  -1 -11   1   16.20    1.08
  -1 -11   1   14.95    1.19
  -1 -11   1   14.02    1.09
  -1 -11   1   15.03    1.16
  -1 -11   1   14.73    1.20
  -1 -11   1   13.92    1.07
   0  11  -1    0.83    0.56
   0  11  -1    0.62    0.74
   0  11  -1   -0.15    0.67
   0  11  -1   -0.51    0.60
   0  11  -1   -0.14    0.66
   0  11  -1    0.80    0.60
   0  11  -1    0.43    0.57
   0  11  -1    0.55    0.61
   0  11  -1    1.49    0.65
   0 -11   1    0.63    0.58
   0 -11   1    0.10    0.59
   0 -11   1    0.88    0.65
   0 -11   1    0.96    0.75
   0 -11   1    0.55    0.69
   0 -11   1    1.05    0.58
   0 -11   1   -0.61    0.64
   0 -11   1   -0.65    0.66
   0 -11   1   -0.34    0.60
  -1  11  -1    1.04    0.26
  -1  11  -1    0.90    0.60
  -1  11  -1    0.65    0.78
  -1  11  -1   -0.34    0.63
  -1  11  -1    1.14    0.64
  -1  11  -1    0.12    0.65
  -1  11  -1    0.53    0.28
  -1  11  -1    0.60    0.68
  -1  11  -1   -0.02    0.64
  -1  11  -1    1.43    0.70
  -1  11  -1    0.25    0.69
   1 -11   1    1.15    0.65
   1 -11   1    1.42    0.78
   1 -11   1   -0.49    0.53
   1 -11   1    2.82    1.14
   1 -11   1    0.73    0.67
   1 -11   1    0.28    0.61
   1 -11   1    1.63    0.90
   1 -11   1   -0.33    0.65
   1 -11   1    0.86    0.69
  -2  11  -1    1.43    0.51
  -2  11  -1   -0.28    0.56
  -2  11  -1    2.12    0.82
  -2  11  -1    0.24    0.73
  -2  11  -1    0.20    0.67
  -2  11  -1    0.95    0.70
  -2  11  -1    1.39    0.73
  -2  11  -1    0.87    0.40
  -2  11  -1    1.68    0.67
  -2  11  -1    1.66    0.69
  -2  11  -1    0.84    0.71
   2 -11   1    1.27    0.70
   2 -11   1    2.69    0.79
   2 -11   1    1.09    0.69
   2 -11   1    2.08    0.74
   2 -11   1   -0.32    1.03
   2 -11   1    1.09    0.64
   2 -11   1    1.68    0.80
  -3  11  -1    1.93    0.51
  -3  11  -1    1.33    0.60
  -3  11  -1    1.83    0.90
  -3  11  -1    0.67    0.79
  -3  11  -1    0.59    0.71
  -3  11  -1    2.13    0.86
  -3  11  -1    1.93    0.80
  -3  11  -1    1.78    0.77
  -3  11  -1    0.43    0.71
  -3  11  -1    1.15    0.99
  -3  11  -1    1.23    0.47
   3 -11   1    0.85    0.69
   3 -11   1    0.68    0.68
   3 -11   1    0.90    0.71
   3 -11   1    1.23    0.78
   3 -11   1    1.73    1.09
   3 -11   1    1.78    0.80
   3 -11   1    1.12    0.69
   3 -11   1    0.81    0.85
  -4  11  -1    2.47    0.63
  -4  11  -1   -0.52    0.77
  -4  11  -1    0.47    0.89
  -4  11  -1    0.67    0.64
  -4  11  -1    1.38    0.80
  -4  11  -1    1.86    0.88
  -4  11  -1    1.22    0.91
  -4  11  -1    1.42    0.53
  -4  11  -1    1.20    0.60
  -4  11  -1    0.60    0.78
   4 -11   1    1.65    0.84
   4 -11   1    0.56    0.74
   4 -11   1    1.39    1.19
   4 -11   1    0.24    1.02
   4 -11   1    0.64    0.79
   4 -11   1    0.96    0.82
   4 -11   1    0.89    0.78
   4 -11   1    0.25    0.68
  -5  11  -1    0.02    0.66
  -5  11  -1   -1.28    0.85
  -5  11  -1    1.34    0.64
  -5  11  -1    0.07    0.59
  -5  11  -1    0.54    0.87
  -5  11  -1    0.83    0.77
  -5  11  -1    0.93    0.87
  -5  11  -1   -1.11    0.98
   5 -11   1    0.32    0.68
   5 -11   1    0.18    0.79
   5 -11   1    0.09    0.75
   5 -11   1    0.25    0.79
   5 -11   1    0.07    0.75
   5 -11   1   -0.34    0.85
   5 -11   1    0.81    0.83
   5 -11   1   -0.61    0.93
  -6  11  -1    2.00    0.98
  -6  11  -1    1.05    0.95
  -6  11  -1    0.91    0.98
  -6  11  -1    0.27    0.82
  -6  11  -1    0.14    0.62
  -6  11  -1    3.41    1.19
  -6  11  -1    1.04    1.11
  -6  11  -1    0.71    0.69
   6 -11   1    0.56    0.86
   6 -11   1    1.06    0.91
   6 -11   1    1.07    0.71
   6 -11   1    1.32    0.97
   6 -11   1   -0.25    1.02
   6 -11   1    0.13    0.85
   6 -11   1    1.91    0.95
   6 -11   1   -1.28    0.98
  -7  11  -1    1.02    0.97
  -7  11  -1   -0.21    1.12
  -7  11  -1    2.46    1.31
  -7  11  -1    0.27    0.77
  -7  11  -1   -0.69    1.02
  -7  11  -1    0.54    0.63
   7 -11   1   -0.07    1.05
   7 -11   1    1.33    0.85
   7 -11   1   -2.52    1.39
   7 -11   1    3.70    1.82
   7 -11   1    1.06    0.91
   7 -11   1   -2.43    0.98
   7 -11   1    1.16    0.72
  -8  11  -1    4.11    1.19
  -8  11  -1    3.53    1.00
  -8  11  -1    4.49    1.23
  -8  11  -1    4.24    1.36
   8 -11   1    2.08    1.14
   8 -11   1    3.83    1.19
   8 -11   1    3.53    0.69
   8 -11   1    5.50    1.16
   8 -11   1    4.19    1.42
   8 -11   1    3.81    1.15
   8 -11   1    6.51    1.86
  -9  11  -1   -1.11    1.16
  -9  11  -1    2.79    1.23
  -9  11  -1    3.98    1.39
   9 -11   1    1.93    1.36
   9 -11   1   -0.59    1.52
   9 -11   1   -0.03    1.10
   9 -11   1    1.55    1.20
   9 -11   1    1.30    1.06
 -10  11  -1    3.60    1.42
 -10  11  -1    3.42    1.55
 -10  11  -1    2.68    1.22
  10 -11   1    1.94    1.22
  10 -11   1    3.69    1.45
  10 -11   1    1.20    1.17
 -11  11  -1   -0.61    1.75
 -11  11  -1   -0.43    1.46
 -11  11  -1   -1.80    1.34
  11 -11   1    0.52    1.59
  11 -11   1   -2.36    1.28
  11 -11   1   -0.13    1.55
  15  10  -1    0.16    1.28
  15  10  -1   -0.62    0.87
  15  10  -1   -0.69    1.47
 -15 -10   1    3.91    1.45
 -15 -10   1   -0.66    1.23
 -15 -10   1    0.29    0.87
  14  10  -1   -1.38    1.21
  14  10  -1    1.04    1.32
  14  10  -1    0.70    0.77
 -14 -10   1    0.28    0.79
 -14 -10   1   -1.21    0.80
 -14 -10   1    2.39    1.34
 -14 -10   1    1.53    1.10
  13  10  -1   -0.91    0.96
  13  10  -1   -0.70    0.72
  13  10  -1    0.83    0.69
  13  10  -1    0.00    1.15
 -13 -10   1    0.87    1.18
 -13 -10   1    1.53    0.75
 -13 -10   1    0.15    0.95
 -13 -10   1   -0.26    0.72
  12  10  -1    0.39    0.91
  12  10  -1   -0.49    0.66
  12  10  -1    1.91    1.03
  12  10  -1    0.12    0.64
 -12 -10   1   -0.21    0.64
 -12 -10   1   -0.56    0.96
 -12 -10   1    0.51    0.44
 -12 -10   1   -0.27    0.78
 -12 -10   1    0.01    0.64
  11  10  -1    1.06    0.65
  11  10  -1    0.74    0.95
  11  10  -1    1.28    0.59
  11  10  -1    2.06    0.87
 -11 -10   1    1.13    0.72
 -11 -10   1    0.49    0.51
 -11 -10   1    0.60    0.62
 -11 -10   1    1.39    0.61
 -11 -10   1    0.68    0.43
 -11 -10   1    1.23    0.49
 -11 -10   1    0.94    0.94
 -11 -10   1    0.76    0.82
 -11 -10   1    1.62    0.50
  10  10  -1    0.17    0.56
  10  10  -1    1.58    0.80
  10  10  -1    0.72    0.56
  10  10  -1    0.84    0.51
 -10 -10   1    0.56    0.75
 -10 -10   1    0.46    0.46
 -10 -10   1    0.60    0.47
 -10 -10   1    1.60    0.89
 -10 -10   1    0.33    0.59
 -10 -10   1    0.92    0.41
 -10 -10   1    0.24    0.77
 -10 -10   1    0.88    0.91
 -10 -10   1    1.35    0.57
 -10 -10   1    0.91    0.56
   9  10  -1    1.12    0.61
   9  10  -1    0.76    0.50
   9  10  -1    0.63    0.72
  -9 -10   1    0.54    0.63
  -9 -10   1    0.73    0.52
  -9 -10   1    0.60    0.41
  -9 -10   1    0.50    0.59
  -9 -10   1    1.11    0.52
  -9 -10   1   -0.03    0.75
  -9 -10   1    0.41    0.49
  -9 -10   1    0.47    0.44
  -9 -10   1   -0.28    0.87
   8  10  -1    5.88    0.88
   8  10  -1    5.78    0.70
   8  10  -1    7.28    0.88
   8  10  -1    7.23    0.76
   8  10  -1    5.77    0.73
  -8 -10   1    6.13    0.73
  -8 -10   1    4.66    0.87
  -8 -10   1    5.90    0.69
  -8 -10   1    7.17    0.71
  -8 -10   1    5.98    0.96
  -8 -10   1    6.64    0.65
  -8 -10   1    6.57    0.84
  -8 -10   1    5.79    0.61
  -8 -10   1    5.51    0.68
  -8 -10   1    6.75    0.64
   7  10  -1    0.92    0.69
   7  10  -1    0.78    0.48
   7  10  -1    0.13    0.46
   7  10  -1   -0.46    0.42
   7  10  -1    1.65    0.87
   7  10  -1    0.53    0.44
   7  10  -1    0.54    0.56
  -7 -10   1    0.96    0.42
  -7 -10   1    1.24    0.72
  -7 -10   1    0.52    0.49
  -7 -10   1    0.60    0.37
  -7 -10   1    0.57    0.51
  -7 -10   1    0.86    0.45
  -7 -10   1    0.16    0.68
  -7 -10   1    0.12    0.50
   6  10  -1    3.76    0.54
   6  10  -1    4.23    0.57
   6  10  -1    4.08    0.63
   6  10  -1    4.31    0.56
   6  10  -1    5.20    0.62
   6  10  -1    5.08    0.69
   6  10  -1    4.47    0.75
   6  10  -1    5.85    0.90
  -6 -10   1    4.26    0.86
  -6 -10   1    4.41    0.54
  -6 -10   1    4.34    0.70
  -6 -10   1    4.53    0.62
  -6 -10   1    4.19    0.56
  -6 -10   1    4.12    0.35
  -6 -10   1    4.67    0.47
  -6 -10   1    4.90    0.81
  -6 -10   1    4.53    0.59
  -6 -10   1    4.43    0.84
  -6 -10   1    4.56    0.62
  -6 -10   1    3.68    0.74
   5  10  -1    0.17    0.40
   5  10  -1    0.81    0.44
   5  10  -1    0.81    0.45
   5  10  -1    0.24    0.45
   5  10  -1    0.38    0.60
   5  10  -1    0.20    0.51
   5  10  -1    0.67    0.71
   5  10  -1    1.33    0.46
  -5 -10   1    1.69    0.47
  -5 -10   1    0.47    0.63
  -5 -10   1    0.83    0.43
  -5 -10   1    0.74    0.70
  -5 -10   1    0.98    0.56
  -5 -10   1    0.56    0.43
  -5 -10   1    0.40    0.53
  -5 -10   1    0.27    0.67
  -5 -10   1    0.99    0.45
  -5 -10   1    1.35    0.48
   4  10  -1   18.03    1.14
   4  10  -1   17.49    0.96
   4  10  -1   16.35    0.93
   4  10  -1   17.27    1.20
   4  10  -1   17.89    0.95
   4  10  -1   17.75    1.02
   4  10  -1   17.08    0.99
   4  10  -1   15.92    0.97
  -4 -10   1   18.31    1.03
  -4 -10   1   18.21    0.98
  -4 -10   1   18.58    0.94
  -4 -10   1   17.24    1.14
  -4 -10   1   16.87    1.20
  -4 -10   1   19.58    1.20
  -4 -10   1   16.78    1.17
  -4 -10   1   19.26    1.02
  -4 -10   1   17.98    0.95
  -4 -10   1   17.72    0.96
   3  10  -1    2.34    0.65
   3  10  -1    2.62    0.54
   3  10  -1    1.57    0.64
   3  10  -1    2.37    0.52
   3  10  -1    2.17    0.56
   3  10  -1    1.95    0.49
  -3 -10   1    1.74    0.59
  -3 -10   1    1.71    0.64
  -3 -10   1    2.31    0.55
  -3 -10   1    1.65    0.55
  -3 -10   1    2.02    0.56
  -3 -10   1    1.81    0.63
  -3 -10   1    2.52    0.69
  -3 -10   1    2.57    0.50
  -3 -10   1    1.55    0.52
  -3 -10   1    2.81    0.60
   2  10  -1    6.53    0.80
   2  10  -1    5.09    0.68
   2  10  -1    7.03    0.85
   2  10  -1    5.41    0.76
   2  10  -1    6.77    0.72
   2  10  -1    5.13    0.69
   2  10  -1    5.67    0.67
   2  10  -1    5.21    0.91
   2  10  -1    7.01    0.89
  -2 -10   1    5.26    0.72
  -2 -10   1    4.62    0.72
  -2 -10   1    6.66    0.86
  -2 -10   1    5.32    0.68
  -2 -10   1    5.04    0.74
  -2 -10   1    5.66    0.69
  -2 -10   1    5.86    0.64
  -2 -10   1    4.43    0.58
  -2 -10   1    5.75    0.70
   1  10  -1    4.36    0.65
   1  10  -1    3.40    0.68
   1  10  -1    3.24    0.66
   1  10  -1    3.53    0.65
   1  10  -1    2.14    0.60
   1  10  -1    3.04    0.54
   1  10  -1    4.40    0.76
   1  10  -1    4.21    0.66
   1  10  -1    4.32    0.65
  -1 -10   1    3.13    0.65
  -1 -10   1    4.61    0.67
  -1 -10   1    4.33    0.70
  -1 -10   1    4.32    0.64
  -1 -10   1    3.74    0.60
  -1 -10   1    3.85    0.63
  -1 -10   1    3.74    0.68
  -1 -10   1    2.96    0.63
  -1 -10   1    4.05    0.68
   0  10  -1    1.70    0.56
   0  10  -1    1.44    0.55
   0  10  -1    1.46    0.66
   0  10  -1    1.70    0.56
   0  10  -1    2.64    0.57
   0  10  -1    0.83    0.61
   0  10  -1    0.81    0.59
   0  10  -1    2.19    0.60
   0  10  -1    1.80    0.57
   0 -10   1    1.56    0.61
   0 -10   1    0.40    0.48
   0 -10   1    2.64    0.65
   0 -10   1    1.02    0.60
   0 -10   1    1.23    0.61
   0 -10   1    1.56    0.55
   0 -10   1    1.54    0.64
   0 -10   1    1.39    0.60
   0 -10   1    1.86    0.55
  -1  10  -1    1.29    0.58
  -1  10  -1   -0.07    0.63
  -1  10  -1    0.59    0.53
  -1  10  -1    1.09    0.26
  -1  10  -1    0.23    0.66
  -1  10  -1    0.74    0.27
  -1  10  -1    1.95    0.62
  -1  10  -1    1.50    0.55
  -1  10  -1    0.74    0.55
  -1  10  -1    1.24    0.58
  -1  10  -1    1.17    0.60
   1 -10   1    0.48    0.60
   1 -10   1    0.69    0.58
   1 -10   1    1.94    0.61
   1 -10   1    0.75    0.61
   1 -10   1    1.34    0.70
   1 -10   1    0.81    0.48
   1 -10   1    0.35    0.65
   1 -10   1    1.10    0.61
   1 -10   1    0.93    0.56
  -2  10  -1    7.37    0.92
  -2  10  -1    5.14    0.74
  -2  10  -1    6.11    0.78
  -2  10  -1    6.20    0.78
  -2  10  -1    5.94    1.40
  -2  10  -1    6.35    0.83
  -2  10  -1    6.72    0.92
  -2  10  -1    6.11    0.71
  -2  10  -1    7.98    0.88
  -2  10  -1    5.63    0.57
   2 -10   1    8.51    1.30
   2 -10   1    6.59    0.83
   2 -10   1    7.00    1.33
   2 -10   1    6.30    0.71
   2 -10   1    5.43    0.83
   2 -10   1    5.94    0.82
   2 -10   1    5.61    0.79
   2 -10   1    5.36    0.81
   2 -10   1    9.57    1.14
  -3  10  -1    3.02    0.78
  -3  10  -1    3.14    0.51
  -3  10  -1    3.62    0.86
  -3  10  -1    3.70    0.63
  -3  10  -1    2.76    0.76
  -3  10  -1    3.90    0.81
  -3  10  -1    3.45    0.77
  -3  10  -1    2.40    0.64
  -3  10  -1    2.57    0.74
  -3  10  -1    4.13    0.78
  -3  10  -1    2.93    0.48
   3 -10   1    3.38    0.75
   3 -10   1    3.68    0.69
   3 -10   1    3.57    0.70
   3 -10   1    3.72    0.85
   3 -10   1    4.45    0.75
   3 -10   1    2.47    0.68
   3 -10   1    3.68    0.95
   3 -10   1    4.53    0.90
   3 -10   1    4.36    1.01
  -4  10  -1    0.17    0.76
  -4  10  -1   -0.27    0.62
  -4  10  -1    0.26    0.51
  -4  10  -1    0.61    0.78
  -4  10  -1    0.15    0.66
  -4  10  -1    0.11    0.69
  -4  10  -1   -0.01    0.46
  -4  10  -1   -0.20    0.68
  -4  10  -1    1.05    0.81
  -4  10  -1    0.23    0.54
  -4  10  -1    1.41    0.70
   4 -10   1    0.89    0.74
   4 -10   1   -0.48    0.67
   4 -10   1    0.31    0.60
   4 -10   1   -0.34    0.65
   4 -10   1    0.18    0.64
   4 -10   1    0.88    0.85
   4 -10   1    0.07    1.17
   4 -10   1    1.18    0.78
  -5  10  -1    1.64    0.74
  -5  10  -1   -1.28    1.10
  -5  10  -1    1.43    0.57
  -5  10  -1    1.22    0.76
  -5  10  -1    2.52    0.64
  -5  10  -1   -0.07    0.80
  -5  10  -1    1.61    0.58
  -5  10  -1    1.43    0.76
  -5  10  -1    1.00    0.86
  -5  10  -1    0.26    0.83
   5 -10   1    2.13    0.63
   5 -10   1    2.37    0.74
   5 -10   1    1.48    0.72
   5 -10   1    0.96    0.69
   5 -10   1    0.84    0.72
   5 -10   1    0.82    0.88
   5 -10   1    2.02    0.67
   5 -10   1    0.05    0.74
   5 -10   1    1.89    0.85
  -6  10  -1    0.59    0.95
  -6  10  -1    1.76    0.88
  -6  10  -1    2.65    0.62
  -6  10  -1    1.98    0.95
  -6  10  -1    1.74    0.85
  -6  10  -1    1.70    0.81
  -6  10  -1    1.80    0.72
  -6  10  -1    2.84    0.91
   6 -10   1    2.11    0.89
   6 -10   1    2.68    0.80
   6 -10   1    1.19    0.83
   6 -10   1    1.56    0.99
   6 -10   1    1.54    0.99
   6 -10   1    3.62    0.91
   6 -10   1    3.43    0.67
   6 -10   1    2.20    0.84
   6 -10   1    2.76    0.84
  -7  10  -1   -0.61    0.91
  -7  10  -1    1.99    0.89
  -7  10  -1    1.24    0.56
  -7  10  -1    2.69    0.94
  -7  10  -1    2.21    0.99
  -7  10  -1    1.67    0.77
  -7  10  -1    0.91    1.08
  -7  10  -1    2.34    1.10
   7 -10   1    0.85    0.86
   7 -10   1    2.53    1.03
   7 -10   1    1.21    0.98
   7 -10   1   -1.68    0.96
   7 -10   1    0.45    0.84
   7 -10   1    2.31    1.07
   7 -10   1   -0.03    0.60
   7 -10   1    0.14    0.83
   7 -10   1    1.02    0.84
  -8  10  -1    1.99    1.19
  -8  10  -1    2.99    1.06
  -8  10  -1    2.56    1.10
  -8  10  -1    5.33    0.95
  -8  10  -1    2.87    1.03
   8 -10   1    1.39    0.97
   8 -10   1    2.88    1.15
   8 -10   1    2.05    1.38
   8 -10   1    3.89    1.02
   8 -10   1    0.56    1.14
   8 -10   1    4.02    0.66
   8 -10   1    2.80    1.18
   8 -10   1    2.49    0.56
  -9  10  -1    0.73    1.20
  -9  10  -1   -0.40    1.07
  -9  10  -1    1.18    0.99
  -9  10  -1    0.88    1.12
   9 -10   1    0.99    0.98
   9 -10   1    0.10    0.57
   9 -10   1    1.56    1.13
   9 -10   1    2.16    2.02
   9 -10   1    0.92    1.11
   9 -10   1    1.43    1.11
 -10  10  -1   -0.68    1.07
 -10  10  -1    2.95    1.37
 -10  10  -1   -1.07    1.17
  10 -10   1    1.59    1.27
  10 -10   1    1.92    1.14
  10 -10   1   -0.90    1.23
  10 -10   1    0.69    1.21
 -11  10  -1    0.05    1.54
 -11  10  -1   -0.16    1.30
 -11  10  -1    0.45    1.23
  11 -10   1    1.50    1.32
  11 -10   1    2.16    1.46
  11 -10   1    3.92    1.50
 -12  10  -1    1.15    1.50
 -12  10  -1    1.28    1.87
 -12  10  -1   -0.30    1.41
  12 -10   1    3.09    1.46
  12 -10   1    3.72    1.62
  12 -10   1    0.41    1.65
  16   9  -1   -0.02    1.16
  16   9  -1   -0.87    1.56
 -16  -9   1   -1.66    1.45
 -16  -9   1   -2.64    1.05
  15   9  -1    2.12    1.42
  15   9  -1    1.56    1.16
  15   9  -1    1.13    0.88
 -15  -9   1    2.07    1.55
 -15  -9   1    1.07    0.90
 -15  -9   1    3.16    1.30
  14   9  -1    3.97    1.14
  14   9  -1    1.82    0.78
  14   9  -1    1.97    1.25
 -14  -9   1    1.98    0.85
 -14  -9   1   -0.36    1.18
 -14  -9   1    0.99    0.77
 -14  -9   1    0.38    1.07
  13   9  -1    3.88    1.14
  13   9  -1    4.38    1.02
  13   9  -1    4.32    0.79
  13   9  -1    4.84    0.83
 -13  -9   1    4.02    1.22
 -13  -9   1    5.11    0.81
 -13  -9   1    4.22    0.80
 -13  -9   1    6.39    1.03
  12   9  -1    1.08    0.84
  12   9  -1    1.87    0.64
  12   9  -1    1.38    1.06
  12   9  -1    1.16    0.66
 -12  -9   1    1.18    0.51
 -12  -9   1    1.76    0.67
 -12  -9   1    2.01    0.81
 -12  -9   1    1.75    0.43
 -12  -9   1    1.71    1.06
 -12  -9   1    1.23    0.71
 -12  -9   1    1.24    0.66
  11   9  -1    4.92    0.69
  11   9  -1    5.31    0.95
  11   9  -1    4.15    0.54
  11   9  -1    5.16    0.71
  11   9  -1    3.85    1.01
 -11  -9   1    4.00    0.54
 -11  -9   1    3.94    0.54
 -11  -9   1    4.94    0.50
 -11  -9   1    4.94    1.04
 -11  -9   1    4.90    0.80
 -11  -9   1    6.39    0.95
 -11  -9   1    4.66    0.68
 -11  -9   1    5.64    0.56
 -11  -9   1    4.32    0.68
  10   9  -1   -0.23    0.70
  10   9  -1    0.78    0.47
  10   9  -1    0.39    0.50
 -10  -9   1    0.81    0.44
 -10  -9   1    0.25    0.38
 -10  -9   1    0.10    0.86
 -10  -9   1   -0.33    0.56
 -10  -9   1    0.20    0.49
 -10  -9   1    0.66    0.48
 -10  -9   1    0.40    0.42
 -10  -9   1    0.69    0.71
   9   9  -1   -0.29    0.43
   9   9  -1   -0.22    0.44
   9   9  -1    0.65    0.69
   9   9  -1    0.20    0.45
   9   9  -1    0.45    0.76
  -9  -9   1   -0.47    0.68
  -9  -9   1    0.35    0.45
  -9  -9   1   -0.62    0.48
  -9  -9   1    0.63    0.37
  -9  -9   1   -0.80    0.46
  -9  -9   1    0.10    0.58
  -9  -9   1   -0.25    0.39
  -9  -9   1    0.18    0.40
   8   9  -1    1.16    0.41
   8   9  -1    1.57    0.87
   8   9  -1    1.05    0.47
   8   9  -1    2.29    0.47
   8   9  -1    1.92    0.67
   8   9  -1    1.60    0.54
  -8  -9   1    1.11    0.40
  -8  -9   1    2.17    0.41
  -8  -9   1    0.75    0.69
  -8  -9   1    0.72    0.36
  -8  -9   1    1.33    0.49
  -8  -9   1    1.37    0.38
  -8  -9   1    1.52    0.48
  -8  -9   1    1.38    0.70
  -8  -9   1    1.55    0.48
  -8  -9   1    2.10    0.52
  -8  -9   1    1.21    0.50
  -8  -9   1    1.58    0.72
   7   9  -1    5.20    0.69
   7   9  -1    5.32    0.65
   7   9  -1    5.22    0.64
   7   9  -1    5.03    0.75
   7   9  -1    5.59    0.64
   7   9  -1    5.26    0.61
   7   9  -1    5.90    1.07
   7   9  -1    5.48    0.90
  -7  -9   1    5.31    0.82
  -7  -9   1    5.04    0.55
  -7  -9   1    5.11    0.60
  -7  -9   1    5.03    0.62
  -7  -9   1    5.06    0.76
  -7  -9   1    5.73    0.72
  -7  -9   1    4.72    0.53
  -7  -9   1    4.82    0.61
  -7  -9   1    5.07    0.49
  -7  -9   1    3.88    0.86
  -7  -9   1    5.99    0.89
  -7  -9   1    5.24    0.51
   6   9  -1    1.06    0.69
   6   9  -1    1.26    0.44
   6   9  -1    1.41    0.60
   6   9  -1    1.66    0.41
   6   9  -1    1.47    0.47
   6   9  -1    1.81    0.42
   6   9  -1    1.11    0.44
   6   9  -1    2.44    0.45
  -6  -9   1    1.18    0.39
  -6  -9   1    1.33    0.33
  -6  -9   1    1.59    0.46
  -6  -9   1    1.50    0.43
  -6  -9   1    1.65    0.67
  -6  -9   1    1.24    0.44
  -6  -9   1    1.69    0.79
  -6  -9   1    0.74    0.38
  -6  -9   1    0.86    0.64
  -6  -9   1    0.95    0.62
  -6  -9   1    0.96    0.58
  -6  -9   1    1.99    0.36
   5   9  -1    3.88    0.54
   5   9  -1    4.29    0.69
   5   9  -1    3.11    0.47
   5   9  -1    3.78    0.54
   5   9  -1    4.11    0.73
   5   9  -1    3.66    0.48
   5   9  -1    3.76    0.50
   5   9  -1    3.74    0.51
  -5  -9   1    3.78    0.49
  -5  -9   1    4.18    0.52
  -5  -9   1    2.94    0.65
  -5  -9   1    3.84    0.50
  -5  -9   1    4.73    0.70
  -5  -9   1    3.33    0.29
  -5  -9   1    3.01    0.73
  -5  -9   1    3.40    0.52
  -5  -9   1    3.79    0.52
  -5  -9   1    4.11    0.72
  -5  -9   1    3.41    0.47
  -5  -9   1    3.33    0.39
   4   9  -1    1.34    0.41
   4   9  -1    0.56    0.41
   4   9  -1    0.70    0.39
   4   9  -1    1.71    0.58
   4   9  -1    1.28    0.45
   4   9  -1    0.77    0.57
   4   9  -1    1.43    0.43
   4   9  -1    1.64    0.49
  -4  -9   1    0.97    0.53
  -4  -9   1    1.29    0.41
  -4  -9   1    0.51    0.53
  -4  -9   1    0.92    0.42
  -4  -9   1    1.78    0.45
  -4  -9   1    2.32    0.52
  -4  -9   1    1.56    0.60
  -4  -9   1    1.28    0.61
  -4  -9   1    1.33    0.43
  -4  -9   1    1.41    0.47
   3   9  -1    2.29    0.47
   3   9  -1    2.07    0.47
   3   9  -1    2.07    0.56
   3   9  -1    1.33    0.57
   3   9  -1    1.88    0.48
   3   9  -1    2.01    0.50
   3   9  -1    1.86    0.46
   3   9  -1    0.63    0.36
  -3  -9   1    1.75    0.43
  -3  -9   1    1.82    0.56
  -3  -9   1    1.86    0.51
  -3  -9   1    2.20    0.57
  -3  -9   1    1.98    0.58
  -3  -9   1    1.60    0.48
  -3  -9   1    2.71    0.66
  -3  -9   1    1.74    0.43
  -3  -9   1    1.73    0.45
  -3  -9   1    3.01    0.48
   2   9  -1    1.05    0.50
   2   9  -1    1.19    0.53
   2   9  -1    0.48    0.43
   2   9  -1    0.37    0.52
   2   9  -1    0.00    0.36
   2   9  -1    0.26    0.40
   2   9  -1    1.21    0.46
   2   9  -1    1.88    0.53
  -2  -9   1    0.85    0.45
  -2  -9   1    0.51    0.44
  -2  -9   1    1.30    0.50
  -2  -9   1   -0.20    0.42
  -2  -9   1    0.00    0.45
  -2  -9   1    0.78    0.45
  -2  -9   1    1.03    0.54
  -2  -9   1    0.09    0.53
  -2  -9   1    0.47    0.40
   1   9  -1    2.65    0.57
   1   9  -1    2.71    0.54
   1   9  -1    1.59    0.51
   1   9  -1    1.96    0.50
   1   9  -1    1.88    0.53
   1   9  -1    1.82    0.63
   1   9  -1    2.52    0.53
   1   9  -1    1.42    0.41
  -1  -9   1    1.98    0.51
  -1  -9   1    2.69    0.53
  -1  -9   1    1.68    0.48
  -1  -9   1    3.26    0.57
  -1  -9   1    2.21    0.53
  -1  -9   1    2.41    0.55
  -1  -9   1    2.21    0.52
  -1  -9   1    1.87    0.50
  -1  -9   1    2.40    0.60
   0   9  -1    1.12    0.49
   0   9  -1    0.47    0.48
   0   9  -1    1.00    0.54
   0   9  -1    0.13    0.47
   0   9  -1    0.63    0.47
   0   9  -1    0.91    0.48
   0   9  -1    1.44    0.54
   0   9  -1    1.41    0.53
   0   9  -1    0.16    0.41
   0  -9   1    0.17    0.47
   0  -9   1    1.40    0.55
   0  -9   1    0.57    0.41
   0  -9   1    1.16    0.52
   0  -9   1    0.19    0.50
   0  -9   1    0.64    0.47
   0  -9   1    0.78    0.50
   0  -9   1    0.38    0.46
   0  -9   1    0.01    0.46
  -1   9  -1    1.30    0.55
  -1   9  -1    1.95    0.53
  -1   9  -1    0.98    0.50
  -1   9  -1    1.73    0.58
  -1   9  -1    1.83    0.60
  -1   9  -1    1.58    0.26
  -1   9  -1    1.69    0.54
  -1   9  -1    2.23    0.57
  -1   9  -1    2.31    0.55
  -1   9  -1    1.67    0.50
  -1   9  -1    1.47    0.28
   1  -9   1    2.23    0.58
   1  -9   1    1.22    0.52
   1  -9   1    0.92    0.57
   1  -9   1    1.17    0.47
   1  -9   1    0.52    0.51
   1  -9   1    1.34    0.57
   1  -9   1    1.80    0.56
   1  -9   1    1.47    0.53
   1  -9   1    0.96    0.52
  -2   9  -1    1.33    0.59
  -2   9  -1    1.07    0.70
  -2   9  -1    0.98    0.56
  -2   9  -1    0.53    0.32
  -2   9  -1    0.16    0.51
  -2   9  -1    0.33    0.56
  -2   9  -1    0.17    0.45
  -2   9  -1    0.71    0.54
  -2   9  -1    0.97    0.61
  -2   9  -1    0.72    0.54
   2  -9   1   -0.42    0.58
   2  -9   1   -0.17    0.42
   2  -9   1    0.60    0.54
   2  -9   1    0.87    0.58
   2  -9   1    1.62    0.88
   2  -9   1    0.06    0.48
   2  -9   1    1.24    0.50
   2  -9   1    0.27    0.46
   2  -9   1    0.35    0.55
  -3   9  -1    3.59    0.70
  -3   9  -1    2.80    0.68
  -3   9  -1    4.36    1.22
  -3   9  -1    2.81    0.54
  -3   9  -1    3.09    0.46
  -3   9  -1    2.93    0.71
  -3   9  -1    2.16    0.66
  -3   9  -1    3.05    0.92
  -3   9  -1    3.00    0.46
  -3   9  -1    2.33    0.66
  -3   9  -1    2.46    0.70
   3  -9   1    3.36    0.49
   3  -9   1    2.65    0.54
   3  -9   1    2.98    0.60
   3  -9   1    3.20    0.73
   3  -9   1    2.43    0.68
   3  -9   1    2.86    0.69
   3  -9   1    2.87    0.68
   3  -9   1    2.48    0.63
   3  -9   1    2.08    0.65
   3  -9   1    4.46    1.13
  -4   9  -1   10.71    1.27
  -4   9  -1    8.39    1.03
  -4   9  -1    7.60    0.80
  -4   9  -1    9.43    1.00
  -4   9  -1    7.30    0.76
  -4   9  -1   13.35    1.69
  -4   9  -1   10.87    1.48
  -4   9  -1    7.96    1.02
  -4   9  -1    8.81    1.03
  -4   9  -1    8.00    0.92
   4  -9   1    9.87    1.32
   4  -9   1    9.06    1.20
   4  -9   1    7.41    0.87
   4  -9   1    9.74    0.84
   4  -9   1    6.59    0.81
   4  -9   1    6.82    0.83
   4  -9   1    8.95    1.16
   4  -9   1    7.00    0.84
   4  -9   1    7.06    0.89
   4  -9   1    6.87    0.84
  -5   9  -1    1.77    0.79
  -5   9  -1    0.41    0.74
  -5   9  -1    0.99    0.69
  -5   9  -1    0.77    0.49
  -5   9  -1    1.09    0.54
  -5   9  -1    1.21    0.69
  -5   9  -1    0.13    0.66
  -5   9  -1   -0.16    0.75
  -5   9  -1    1.89    0.85
  -5   9  -1    0.48    0.69
   5  -9   1    1.27    0.75
   5  -9   1    1.08    0.71
   5  -9   1    0.75    0.52
   5  -9   1    1.44    0.71
   5  -9   1    1.33    0.65
   5  -9   1    1.80    0.62
   5  -9   1    1.13    0.77
   5  -9   1    1.25    0.72
   5  -9   1    0.34    0.64
  -6   9  -1   -0.71    0.75
  -6   9  -1   -0.15    0.73
  -6   9  -1   -0.39    0.82
  -6   9  -1    0.13    0.48
  -6   9  -1    0.05    0.80
  -6   9  -1   -0.39    0.72
  -6   9  -1    0.89    0.78
  -6   9  -1   -0.17    0.70
  -6   9  -1   -0.32    1.16
  -6   9  -1   -0.80    0.55
   6  -9   1    0.76    0.70
   6  -9   1    0.30    0.81
   6  -9   1    0.07    0.51
   6  -9   1    0.05    0.83
   6  -9   1    0.05    0.69
   6  -9   1    1.03    0.72
   6  -9   1   -0.64    0.70
   6  -9   1    0.37    0.71
   6  -9   1    0.28    0.70
  -7   9  -1   -0.89    0.75
  -7   9  -1   -1.46    1.41
  -7   9  -1    0.29    0.90
  -7   9  -1   -0.61    0.44
  -7   9  -1   -1.11    0.76
  -7   9  -1   -0.44    0.97
  -7   9  -1    0.85    0.82
  -7   9  -1    0.55    0.65
   7  -9   1    0.32    0.52
   7  -9   1    0.20    0.75
   7  -9   1   -0.68    0.79
   7  -9   1    1.25    0.79
   7  -9   1    1.03    0.89
   7  -9   1    0.72    0.78
   7  -9   1    0.47    0.75
   7  -9   1    0.57    0.77
   7  -9   1   -0.12    0.76
   7  -9   1   -0.19    0.43
  -8   9  -1   -0.23    0.89
  -8   9  -1   -0.91    0.73
  -8   9  -1    0.85    0.85
  -8   9  -1   -0.08    0.92
  -8   9  -1   -1.01    0.91
  -8   9  -1   -0.16    0.98
   8  -9   1   -0.59    0.96
   8  -9   1    0.38    0.86
   8  -9   1   -0.80    0.82
   8  -9   1   -1.11    1.09
   8  -9   1   -0.23    0.90
   8  -9   1    1.12    0.50
   8  -9   1    0.21    0.44
   8  -9   1   -0.13    0.78
  -9   9  -1    0.50    1.40
  -9   9  -1    0.85    0.96
  -9   9  -1    0.32    0.85
  -9   9  -1    0.05    1.05
  -9   9  -1    1.66    1.00
   9  -9   1   -0.77    0.95
   9  -9   1   -0.25    0.95
   9  -9   1   -0.11    0.95
   9  -9   1   -0.30    0.98
   9  -9   1   -0.17    0.85
   9  -9   1   -0.43    1.12
   9  -9   1    0.56    0.37
 -10   9  -1   -1.14    0.97
 -10   9  -1   -2.13    1.16
 -10   9  -1    0.96    1.10
 -10   9  -1    1.23    1.94
  10  -9   1    0.52    1.16
  10  -9   1   -0.37    1.02
  10  -9   1   -0.08    1.10
  10  -9   1    0.68    1.26
  10  -9   1    0.97    1.06
 -11   9  -1    0.21    1.13
 -11   9  -1    0.48    1.21
 -11   9  -1   -1.09    1.13
  11  -9   1    0.60    1.18
  11  -9   1   -1.10    1.13
  11  -9   1   -0.43    1.27
  11  -9   1    1.85    1.18
 -12   9  -1    0.31    1.39
 -12   9  -1    1.67    1.55
 -12   9  -1   -1.26    1.27
  12  -9   1    0.60    1.29
  12  -9   1   -0.94    1.25
  12  -9   1    0.55    1.55
 -13   9  -1    0.24    1.52
 -13   9  -1    0.77    1.74
 -13   9  -1   -0.72    1.55
  13  -9   1    0.23    1.61
  13  -9   1    0.83    1.45
  13  -9   1    3.06    1.74
  16   8  -1   -0.54    1.52
  16   8  -1    1.40    1.01
 -16  -8   1    0.05    0.94
 -16  -8   1   -3.87    1.51
 -16  -8   1   -1.95    1.30
  15   8  -1   -0.83    1.25
  15   8  -1    0.09    0.87
  15   8  -1    0.91    1.05
 -15  -8   1   -1.88    1.24
 -15  -8   1    0.75    0.85
 -15  -8   1   -0.31    1.16
  14   8  -1   -0.10    0.76
  14   8  -1    0.52    0.83
  14   8  -1   -0.73    1.14
  14   8  -1   -1.18    0.90
 -14  -8   1   -0.54    0.74
 -14  -8   1    0.65    1.01
 -14  -8   1    0.94    0.75
 -14  -8   1   -0.81    1.09
  13   8  -1   -0.02    0.63
  13   8  -1    0.14    1.04
  13   8  -1    0.44    0.73
  13   8  -1    1.56    0.88
 -13  -8   1    1.36    0.67
 -13  -8   1    0.79    0.86
 -13  -8   1    0.00    0.65
 -13  -8   1    1.19    1.10
 -13  -8   1    0.65    0.68
  12   8  -1   -0.70    0.58
  12   8  -1    1.20    0.73
  12   8  -1   -0.69    0.90
  12   8  -1    0.87    0.61
 -12  -8   1   -0.12    0.97
 -12  -8   1    0.41    0.49
 -12  -8   1   -0.57    0.59
 -12  -8   1    0.38    0.40
 -12  -8   1    0.14    0.46
 -12  -8   1    0.59    0.61
 -12  -8   1    0.97    0.51
 -12  -8   1   -0.14    0.75
  11   8  -1    0.94    0.57
  11   8  -1    0.99    0.86
  11   8  -1   -0.54    0.70
  11   8  -1    0.89    0.54
 -11  -8   1    0.54    0.80
 -11  -8   1    0.35    0.52
 -11  -8   1    0.32    0.38
 -11  -8   1   -0.26    0.43
 -11  -8   1    1.29    0.47
 -11  -8   1    0.74    0.51
 -11  -8   1    1.19    0.82
 -11  -8   1    0.57    0.45
 -11  -8   1    1.08    0.86
 -11  -8   1    0.57    0.68
  10   8  -1    0.36    0.43
  10   8  -1    0.04    0.46
  10   8  -1    0.03    0.47
  10   8  -1   -0.44    0.60
  10   8  -1    0.17    0.72
 -10  -8   1    0.34    0.40
 -10  -8   1   -1.29    0.65
 -10  -8   1    0.21    0.47
 -10  -8   1    0.09    0.46
 -10  -8   1    0.23    0.40
 -10  -8   1   -0.96    0.54
 -10  -8   1    0.46    0.43
 -10  -8   1    1.17    0.76
 -10  -8   1    1.32    0.37
 -10  -8   1    0.28    0.75
   9   8  -1   -0.49    0.60
   9   8  -1    0.79    0.66
   9   8  -1    0.19    0.47
   9   8  -1    1.00    0.46
   9   8  -1    0.95    0.41
  -9  -8   1    1.00    0.75
  -9  -8   1    1.03    0.74
  -9  -8   1    0.48    0.45
  -9  -8   1    0.89    0.42
  -9  -8   1    0.37    0.39
  -9  -8   1   -0.37    0.41
  -9  -8   1    0.42    0.50
  -9  -8   1    1.04    0.36
  -9  -8   1    1.35    0.60
  -9  -8   1    0.64    0.39
   8   8  -1    1.19    0.40
   8   8  -1    0.86    0.59
   8   8  -1    1.01    0.41
   8   8  -1    0.85    0.42
   8   8  -1    1.38    0.64
  -8  -8   1    0.71    0.36
  -8  -8   1    1.07    0.43
  -8  -8   1    1.38    0.52
  -8  -8   1    0.76    0.68
  -8  -8   1    1.33    0.33
  -8  -8   1    0.70    0.45
  -8  -8   1    1.25    0.33
  -8  -8   1    2.41    0.42
  -8  -8   1    0.75    0.76
  -8  -8   1    1.74    0.39
  -8  -8   1    1.14    0.42
  -8  -8   1    1.64    0.37
  -8  -8   1    0.50    0.66
  -8  -8   1    0.33    0.82
   7   8  -1    3.83    0.66
   7   8  -1    2.66    0.41
   7   8  -1    2.33    0.65
   7   8  -1    2.57    0.47
   7   8  -1    2.61    0.44
   7   8  -1    3.32    0.81
   7   8  -1    2.83    0.43
  -7  -8   1    3.83    0.70
  -7  -8   1    2.80    0.41
  -7  -8   1    3.32    0.50
  -7  -8   1    2.56    0.71
  -7  -8   1    2.18    0.65
  -7  -8   1    2.46    0.74
  -7  -8   1    2.55    0.38
  -7  -8   1    3.09    0.42
  -7  -8   1    2.42    0.38
  -7  -8   1    2.30    0.44
  -7  -8   1    2.16    0.47
  -7  -8   1    2.45    0.43
  -7  -8   1    2.67    0.48
   6   8  -1   10.33    0.76
   6   8  -1   10.20    0.66
   6   8  -1   10.55    0.68
   6   8  -1   11.28    0.67
   6   8  -1   11.75    0.99
   6   8  -1   10.92    0.73
   6   8  -1   11.76    0.68
   6   8  -1   12.03    1.11
  -6  -8   1    9.53    1.01
  -6  -8   1   10.44    0.92
  -6  -8   1   10.82    0.63
  -6  -8   1   11.58    1.16
  -6  -8   1   11.57    0.64
  -6  -8   1    9.46    0.78
  -6  -8   1   11.08    0.99
  -6  -8   1   11.00    0.74
  -6  -8   1   11.31    0.64
  -6  -8   1   10.81    0.73
  -6  -8   1   13.66    0.98
   5   8  -1   15.14    1.02
   5   8  -1   13.28    0.76
   5   8  -1   12.24    0.70
   5   8  -1   13.87    0.73
   5   8  -1   12.33    0.71
   5   8  -1   11.92    0.92
   5   8  -1   13.64    0.75
   5   8  -1   13.06    0.69
  -5  -8   1   13.16    0.73
  -5  -8   1   11.58    0.94
  -5  -8   1   14.06    0.98
  -5  -8   1   13.89    0.67
  -5  -8   1   12.72    0.96
  -5  -8   1   13.53    0.73
  -5  -8   1   12.56    0.98
  -5  -8   1   12.70    0.56
  -5  -8   1   13.44    0.69
  -5  -8   1   12.97    0.68
  -5  -8   1   13.20    0.77
  -5  -8   1   13.48    0.53
   4   8  -1    4.44    0.49
   4   8  -1    4.87    0.64
   4   8  -1    5.13    0.58
   4   8  -1    5.32    0.65
   4   8  -1    4.92    0.61
   4   8  -1    5.56    0.61
   4   8  -1    4.77    0.56
   4   8  -1    4.89    0.62
  -4  -8   1    5.44    0.63
  -4  -8   1    4.62    0.31
  -4  -8   1    4.73    0.32
  -4  -8   1    5.31    0.58
  -4  -8   1    5.23    0.61
  -4  -8   1    4.32    0.60
  -4  -8   1    5.99    0.68
  -4  -8   1    5.34    0.69
  -4  -8   1    5.27    0.57
  -4  -8   1    4.62    0.57
  -4  -8   1    4.28    0.61
  -4  -8   1    4.38    0.51
   3   8  -1    2.26    0.39
   3   8  -1    3.16    0.48
   3   8  -1    2.32    0.52
   3   8  -1    3.33    0.45
   3   8  -1    3.45    0.44
   3   8  -1    3.38    0.49
   3   8  -1    4.05    0.60
   3   8  -1    2.88    0.44
  -3  -8   1    3.06    0.53
  -3  -8   1    3.24    0.49
  -3  -8   1    3.02    0.59
  -3  -8   1    3.34    0.43
  -3  -8   1    3.28    0.60
  -3  -8   1    4.00    0.52
  -3  -8   1    4.68    0.54
  -3  -8   1    2.94    0.44
  -3  -8   1    3.47    0.54
  -3  -8   1    4.06    0.49
   2   8  -1   20.93    1.04
   2   8  -1   20.23    0.92
   2   8  -1   18.19    0.89
   2   8  -1   18.90    0.87
   2   8  -1   19.13    0.85
   2   8  -1   18.92    0.91
   2   8  -1   20.02    0.94
   2   8  -1   18.94    0.97
  -2  -8   1   20.40    1.01
  -2  -8   1   19.94    0.86
  -2  -8   1   19.46    0.89
  -2  -8   1   18.65    0.97
  -2  -8   1   19.12    0.89
  -2  -8   1   20.04    0.89
  -2  -8   1   20.70    0.92
  -2  -8   1   20.01    1.02
  -2  -8   1   18.59    0.91
   1   8  -1    1.36    0.44
   1   8  -1    0.82    0.46
   1   8  -1    0.96    0.39
   1   8  -1    1.58    0.43
   1   8  -1    1.13    0.42
   1   8  -1    0.38    0.47
   1   8  -1    1.83    0.47
   1   8  -1    0.94    0.46
  -1  -8   1    1.12    0.49
  -1  -8   1    0.95    0.46
  -1  -8   1    0.92    0.43
  -1  -8   1    1.03    0.42
  -1  -8   1    0.17    0.45
  -1  -8   1    1.78    0.44
  -1  -8   1    1.37    0.47
  -1  -8   1    0.73    0.39
  -1  -8   1    0.84    0.46
   0   8  -1    2.24    0.48
   0   8  -1    1.25    0.41
   0   8  -1    1.61    0.17
   0   8  -1    1.68    0.17
   0   8  -1    1.35    0.46
   0   8  -1    2.29    0.52
   0   8  -1    1.72    0.47
   0   8  -1    1.11    0.41
   0   8  -1    1.42    0.45
   0   8  -1    0.64    0.44
   0   8  -1    1.49    0.49
   0  -8   1    0.92    0.49
   0  -8   1    1.49    0.51
   0  -8   1    1.95    0.50
   0  -8   1    1.75    0.50
   0  -8   1    1.11    0.43
   0  -8   1    0.55    0.48
   0  -8   1    1.81    0.51
   0  -8   1    1.03    0.42
   0  -8   1    1.29    0.47
  -1   8  -1   10.53    0.46
  -1   8  -1   11.16    0.90
  -1   8  -1   10.98    0.85
  -1   8  -1    9.22    0.84
  -1   8  -1   10.60    0.89
  -1   8  -1    9.58    0.83
  -1   8  -1    9.24    0.77
  -1   8  -1   10.26    0.82
  -1   8  -1    9.45    0.81
  -1   8  -1    9.71    0.46
  -1   8  -1    9.75    0.85
   1  -8   1   12.11    0.91
   1  -8   1   10.21    0.86
   1  -8   1   10.88    0.88
   1  -8   1   11.19    0.90
   1  -8   1   10.09    0.85
   1  -8   1   10.67    0.82
   1  -8   1    9.91    0.82
   1  -8   1    9.06    0.85
   1  -8   1    9.45    0.85
  -2   8  -1    0.43    0.41
  -2   8  -1    1.05    0.51
  -2   8  -1    1.21    0.32
  -2   8  -1    0.99    0.51
  -2   8  -1    0.49    0.49
  -2   8  -1    1.08    0.56
  -2   8  -1    0.45    0.48
  -2   8  -1    1.05    0.52
  -2   8  -1    0.90    0.49
  -2   8  -1    1.37    0.51
   2  -8   1    0.90    0.30
   2  -8   1    0.12    0.44
   2  -8   1   -0.34    0.47
   2  -8   1    0.49    0.46
   2  -8   1    1.00    0.45
   2  -8   1    0.87    0.41
   2  -8   1    1.83    0.52
   2  -8   1    2.98    1.03
   2  -8   1    0.71    0.50
   2  -8   1    0.95    0.45
  -3   8  -1    0.95    0.54
  -3   8  -1    0.55    0.56
  -3   8  -1    1.13    0.53
  -3   8  -1    0.08    0.77
  -3   8  -1    0.93    0.58
  -3   8  -1    1.03    0.37
  -3   8  -1    0.71    0.55
  -3   8  -1    0.36    0.40
  -3   8  -1    1.18    0.55
   3  -8   1    1.68    0.59
   3  -8   1    0.50    0.47
   3  -8   1    0.89    0.58
   3  -8   1    1.01    0.54
   3  -8   1    1.03    0.52
   3  -8   1    0.59    0.51
   3  -8   1    0.87    0.51
   3  -8   1    0.32    0.41
   3  -8   1    1.13    0.38
   3  -8   1    0.86    0.49
  -4   8  -1    0.51    0.72
  -4   8  -1   -0.24    0.50
  -4   8  -1    0.93    0.57
  -4   8  -1    1.07    0.43
  -4   8  -1    0.06    0.56
  -4   8  -1    0.94    0.54
  -4   8  -1    0.99    0.40
  -4   8  -1    0.36    0.61
  -4   8  -1    1.47    0.62
  -4   8  -1    0.70    0.63
   4  -8   1   -0.38    0.50
   4  -8   1    0.27    0.57
   4  -8   1    1.05    0.46
   4  -8   1    0.06    0.59
   4  -8   1    1.18    0.44
   4  -8   1    0.88    0.68
   4  -8   1    0.10    0.49
   4  -8   1    0.56    0.58
   4  -8   1    0.46    0.61
   4  -8   1   -0.69    0.56
  -5   8  -1    2.05    0.73
  -5   8  -1    1.58    0.45
  -5   8  -1    2.25    0.52
  -5   8  -1    0.50    0.61
  -5   8  -1    2.30    0.78
  -5   8  -1    1.61    0.77
  -5   8  -1    2.51    0.73
  -5   8  -1    1.07    0.64
  -5   8  -1    1.85    0.72
  -5   8  -1    1.85    0.65
   5  -8   1    1.00    0.46
   5  -8   1    0.94    0.65
   5  -8   1    2.26    0.69
   5  -8   1    1.30    0.69
   5  -8   1    1.04    0.59
   5  -8   1    1.08    0.68
   5  -8   1    0.93    0.55
   5  -8   1    3.19    0.72
   5  -8   1    1.16    0.67
   5  -8   1    2.28    0.72
  -6   8  -1    9.33    1.26
  -6   8  -1    8.28    0.98
  -6   8  -1   10.23    1.26
  -6   8  -1    9.50    0.99
  -6   8  -1    8.18    0.92
  -6   8  -1   10.29    1.16
  -6   8  -1   10.47    1.19
  -6   8  -1   10.44    0.96
  -6   8  -1    8.06    0.91
  -6   8  -1    8.28    0.75
   6  -8   1    7.81    0.87
   6  -8   1    9.32    1.22
   6  -8   1    8.51    1.12
   6  -8   1    8.60    1.09
   6  -8   1    8.54    0.87
   6  -8   1   10.64    1.29
   6  -8   1    7.55    1.04
   6  -8   1    9.47    0.75
   6  -8   1    9.82    1.26
   6  -8   1    8.37    1.09
  -7   8  -1    2.02    0.76
  -7   8  -1    0.16    0.80
  -7   8  -1    0.98    0.71
  -7   8  -1    1.88    0.67
  -7   8  -1    1.65    0.84
  -7   8  -1   -0.50    0.74
  -7   8  -1   -0.61    0.73
  -7   8  -1    1.51    0.77
  -7   8  -1    0.84    0.75
   7  -8   1    1.10    0.71
   7  -8   1   -0.04    0.76
   7  -8   1    2.20    0.75
   7  -8   1    1.56    0.78
   7  -8   1    0.08    0.84
   7  -8   1    0.80    0.45
   7  -8   1    1.33    0.42
   7  -8   1    0.37    0.75
   7  -8   1    2.20    0.88
   7  -8   1    1.24    0.86
  -8   8  -1   -0.15    0.82
  -8   8  -1    1.52    0.81
  -8   8  -1    0.20    0.93
  -8   8  -1    1.23    0.88
  -8   8  -1   -0.39    0.70
  -8   8  -1    1.96    0.75
  -8   8  -1    2.53    0.87
   8  -8   1    0.11    1.20
   8  -8   1    1.68    0.79
   8  -8   1    0.78    0.40
   8  -8   1    1.46    0.84
   8  -8   1    3.69    1.16
   8  -8   1    0.73    0.47
   8  -8   1    1.53    0.99
   8  -8   1    2.27    0.85
   8  -8   1   -0.43    0.90
  -9   8  -1   17.86    1.53
  -9   8  -1   13.70    1.60
  -9   8  -1   17.63    1.63
  -9   8  -1   15.81    1.85
  -9   8  -1   16.70    1.69
  -9   8  -1   16.61    1.62
   9  -8   1   14.60    1.74
   9  -8   1   14.66    1.57
   9  -8   1   15.57    1.49
   9  -8   1   16.06    1.75
   9  -8   1   17.70    1.65
   9  -8   1   13.02    1.39
 -10   8  -1   -0.53    1.08
 -10   8  -1    1.34    0.98
 -10   8  -1    0.28    1.11
 -10   8  -1   -1.13    1.53
  10  -8   1   -0.75    1.03
  10  -8   1   -0.60    1.08
  10  -8   1   -2.45    0.89
  10  -8   1   -0.49    1.68
  10  -8   1    1.52    0.99
  10  -8   1    1.23    0.97
 -11   8  -1    0.69    1.09
 -11   8  -1   -1.08    1.02
 -11   8  -1    0.08    1.17
  11  -8   1   -0.22    1.04
  11  -8   1    1.62    1.07
  11  -8   1   -0.34    1.08
  11  -8   1    1.11    1.15
 -12   8  -1    2.25    1.39
 -12   8  -1    1.78    1.27
 -12   8  -1    3.05    1.28
  12  -8   1    0.13    1.17
  12  -8   1   -0.05    1.13
  12  -8   1   -1.21    1.15
  12  -8   1    1.52    1.37
 -13   8  -1    2.45    1.51
 -13   8  -1   -1.04    1.36
 -13   8  -1    1.46    1.47
  13  -8   1   -1.15    1.50
  13  -8   1    2.03    1.45
  13  -8   1    1.04    1.32
  16   7  -1   -0.30    0.96
  16   7  -1    1.24    1.53
 -16  -7   1    4.32    1.72
 -16  -7   1   -0.16    0.91
 -16  -7   1   -0.34    1.33
  15   7  -1   -0.15    0.81
  15   7  -1   -0.02    1.29
 -15  -7   1    0.05    1.19
 -15  -7   1    0.51    1.42
 -15  -7   1   -0.76    0.80
  14   7  -1    1.80    0.87
  14   7  -1    1.05    1.22
  14   7  -1   -0.36    0.81
  14   7  -1    0.09    0.73
 -14  -7   1    0.93    1.16
 -14  -7   1    0.10    0.75
 -14  -7   1    1.60    0.77
 -14  -7   1    2.28    1.09
  13   7  -1    0.31    1.02
  13   7  -1    0.55    0.68
  13   7  -1   -0.44    0.74
  13   7  -1    0.21    0.64
 -13  -7   1    0.56    0.46
 -13  -7   1   -0.70    0.64
 -13  -7   1   -0.19    0.99
 -13  -7   1   -0.28    0.49
 -13  -7   1    1.31    0.68
 -13  -7   1   -0.80    0.60
 -13  -7   1   -0.51    0.94
  12   7  -1   -0.16    0.92
  12   7  -1   -0.20    0.57
  12   7  -1   -0.24    0.61
  12   7  -1    0.08    0.67
  12   7  -1    0.93    0.47
 -12  -7   1    0.24    0.47
 -12  -7   1   -0.82    0.74
 -12  -7   1   -0.06    0.49
 -12  -7   1   -0.40    0.55
 -12  -7   1    0.43    0.85
 -12  -7   1    1.20    0.63
 -12  -7   1    0.07    0.58
 -12  -7   1   -0.14    0.40
 -12  -7   1   -0.98    0.87
  11   7  -1    1.04    0.68
  11   7  -1    0.76    0.45
  11   7  -1   -0.52    0.90
  11   7  -1    0.68    0.68
  11   7  -1   -0.18    1.24
  11   7  -1    0.50    0.52
 -11  -7   1    1.57    0.44
 -11  -7   1    0.34    0.63
 -11  -7   1    0.95    0.69
 -11  -7   1    2.00    0.48
 -11  -7   1    1.24    0.39
 -11  -7   1    0.50    0.44
 -11  -7   1    1.01    0.79
 -11  -7   1    1.46    0.54
  10   7  -1    2.00    0.65
  10   7  -1    2.36    0.53
  10   7  -1    1.78    0.74
  10   7  -1    2.72    0.52
  10   7  -1    2.01    0.77
  10   7  -1    2.15    0.45
 -10  -7   1    3.29    0.77
 -10  -7   1    3.16    0.51
 -10  -7   1    1.88    0.45
 -10  -7   1    2.07    0.65
 -10  -7   1    2.79    0.46
 -10  -7   1    2.54    0.41
 -10  -7   1    1.67    0.74
 -10  -7   1    2.02    0.52
 -10  -7   1    1.97    0.43
 -10  -7   1    1.47    0.76
   9   7  -1   -0.13    0.37
   9   7  -1    0.16    0.58
   9   7  -1    0.68    0.38
   9   7  -1    0.11    0.39
   9   7  -1    0.33    0.54
   9   7  -1    0.77    0.62
   9   7  -1   -0.32    0.41
  -9  -7   1   -0.93    0.58
  -9  -7   1    0.83    0.65
  -9  -7   1   -0.05    0.39
  -9  -7   1   -0.06    0.35
  -9  -7   1    0.06    0.36
  -9  -7   1   -0.29    0.31
  -9  -7   1    0.39    0.65
  -9  -7   1   -0.20    0.35
  -9  -7   1   -0.48    0.48
  -9  -7   1    1.06    0.87
  -9  -7   1    0.38    0.41
   8   7  -1    1.95    0.36
   8   7  -1    1.97    0.56
   8   7  -1    0.99    0.50
   8   7  -1    0.50    0.39
   8   7  -1    1.03    0.61
   8   7  -1    1.47    0.43
   8   7  -1    1.33    0.37
  -8  -7   1    0.90    0.61
  -8  -7   1    1.67    0.39
  -8  -7   1    1.27    0.40
  -8  -7   1    1.69    0.77
  -8  -7   1    0.55    0.45
  -8  -7   1    2.04    0.38
  -8  -7   1    1.07    0.35
  -8  -7   1    0.44    0.50
  -8  -7   1    1.14    0.69
  -8  -7   1    0.47    0.60
  -8  -7   1    1.65    0.41
  -8  -7   1    1.14    0.32
   7   7  -1    1.70    0.40
   7   7  -1    1.37    0.36
   7   7  -1    1.44    0.42
   7   7  -1    1.44    0.48
   7   7  -1    1.50    0.53
   7   7  -1    1.09    0.60
   7   7  -1    1.10    0.67
   7   7  -1    1.47    0.38
   7   7  -1    1.05    0.35
  -7  -7   1    1.11    0.31
  -7  -7   1    1.59    0.31
  -7  -7   1    1.47    0.43
  -7  -7   1    1.28    0.31
  -7  -7   1    1.19    0.66
  -7  -7   1    3.17    0.68
  -7  -7   1    1.26    0.56
  -7  -7   1    1.66    0.57
  -7  -7   1    1.01    0.41
  -7  -7   1    1.95    0.36
  -7  -7   1    1.79    0.35
  -7  -7   1    1.74    0.39
   6   7  -1   10.68    0.62
   6   7  -1    9.90    0.89
   6   7  -1   11.14    0.59
   6   7  -1    9.84    0.66
   6   7  -1   10.31    0.86
   6   7  -1   10.26    1.00
   6   7  -1    9.22    0.65
   6   7  -1   10.70    0.60
   6   7  -1    9.89    0.61
  -6  -7   1   11.11    0.65
  -6  -7   1   10.09    0.57
  -6  -7   1   10.89    0.87
  -6  -7   1   10.15    0.74
  -6  -7   1    9.28    0.78
  -6  -7   1   10.48    0.55
  -6  -7   1   11.11    0.92
  -6  -7   1   11.22    0.60
  -6  -7   1   10.44    0.95
  -6  -7   1    9.17    0.65
  -6  -7   1   10.27    0.67
   5   7  -1   76.38    1.99
   5   7  -1   81.43    1.75
   5   7  -1   81.13    1.75
   5   7  -1   79.94    2.06
   5   7  -1   83.22    1.82
   5   7  -1   79.44    1.81
   5   7  -1   80.76    1.75
   5   7  -1   81.66    1.75
  -5  -7   1   80.59    1.69
  -5  -7   1   80.24    1.74
  -5  -7   1   82.95    2.08
  -5  -7   1   79.85    2.07
  -5  -7   1   81.64    1.74
  -5  -7   1   81.05    1.67
  -5  -7   1   81.77    2.02
  -5  -7   1   80.93    1.69
  -5  -7   1   80.52    2.06
  -5  -7   1   77.20    1.80
  -5  -7   1   78.82    1.80
  -5  -7   1   78.75    1.65
   4   7  -1   16.02    0.90
   4   7  -1   17.62    0.73
   4   7  -1   16.63    0.73
   4   7  -1   18.45    0.74
   4   7  -1   17.57    0.72
   4   7  -1   19.18    0.78
   4   7  -1   17.64    0.94
   4   7  -1   16.08    0.75
  -4  -7   1   17.71    0.76
  -4  -7   1   17.78    0.70
  -4  -7   1   18.40    0.71
  -4  -7   1   17.81    0.96
  -4  -7   1   17.67    0.94
  -4  -7   1   17.29    0.75
  -4  -7   1   18.18    0.54
  -4  -7   1   18.06    0.78
  -4  -7   1   16.59    0.94
  -4  -7   1   17.28    0.92
  -4  -7   1   17.55    0.74
  -4  -7   1   18.13    0.56
   3   7  -1    4.75    0.58
   3   7  -1    5.72    0.55
   3   7  -1    4.95    0.48
   3   7  -1    5.85    0.67
   3   7  -1    4.75    0.55
   3   7  -1    4.31    0.51
   3   7  -1    4.77    0.56
   3   7  -1    4.68    0.46
  -3  -7   1    5.16    0.60
  -3  -7   1    5.49    0.71
  -3  -7   1    4.67    0.55
  -3  -7   1    5.30    0.54
  -3  -7   1    6.11    0.66
  -3  -7   1    4.46    0.46
  -3  -7   1    5.27    0.53
  -3  -7   1    3.93    0.45
  -3  -7   1    6.34    0.69
   2   7  -1    0.26    0.33
   2   7  -1    0.07    0.33
   2   7  -1   -0.33    0.27
   2   7  -1    0.61    0.32
   2   7  -1    0.45    0.40
   2   7  -1    0.30    0.36
   2   7  -1   -0.41    0.38
   2   7  -1    0.34    0.44
   2   7  -1    0.08    0.32
  -2  -7   1    0.13    0.33
  -2  -7   1    0.61    0.33
  -2  -7   1    0.92    0.42
  -2  -7   1    0.21    0.42
  -2  -7   1   -0.09    0.35
  -2  -7   1    0.17    0.38
  -2  -7   1   -0.03    0.31
  -2  -7   1    0.54    0.35
  -2  -7   1    0.51    0.41
   1   7  -1   29.11    1.08
   1   7  -1   26.62    1.00
   1   7  -1   27.36    1.00
   1   7  -1   27.79    1.01
   1   7  -1   28.03    1.06
   1   7  -1   29.19    1.00
   1   7  -1   27.01    1.04
   1   7  -1   28.35    1.01
  -1  -7   1   27.10    1.06
  -1  -7   1   25.30    1.01
  -1  -7   1   26.36    0.96
  -1  -7   1   27.16    1.02
  -1  -7   1   27.81    0.99
  -1  -7   1   28.87    1.05
  -1  -7   1   27.86    1.00
  -1  -7   1   28.72    1.02
  -1  -7   1   26.79    1.00
   0   7  -1   24.09    0.96
   0   7  -1   21.83    0.96
   0   7  -1   22.72    0.51
   0   7  -1   23.25    0.96
   0   7  -1   21.28    0.91
   0   7  -1   22.60    0.51
   0   7  -1   22.67    0.94
   0   7  -1   23.79    0.98
   0   7  -1   22.80    0.95
   0   7  -1   21.17    0.96
   0   7  -1   21.75    0.96
   0  -7   1   23.36    1.00
   0  -7   1   21.68    0.94
   0  -7   1   22.07    0.95
   0  -7   1   21.57    0.94
   0  -7   1   21.76    0.97
   0  -7   1   22.22    0.94
   0  -7   1   22.16    0.97
   0  -7   1   23.20    0.98
   0  -7   1   22.90    0.98
  -1   7  -1    0.41    0.42
  -1   7  -1    0.19    0.36
  -1   7  -1   -0.56    0.42
  -1   7  -1    0.13    0.21
  -1   7  -1    0.19    0.41
  -1   7  -1    0.11    0.39
  -1   7  -1   -0.04    0.35
  -1   7  -1   -0.51    0.41
  -1   7  -1    0.16    0.41
  -1   7  -1   -0.44    0.39
   1  -7   1    0.28    0.43
   1  -7   1   -0.06    0.35
   1  -7   1    0.63    0.44
   1  -7   1    1.08    0.44
   1  -7   1    0.46    0.39
   1  -7   1    0.17    0.40
   1  -7   1    0.16    0.21
   1  -7   1   -0.58    0.34
   1  -7   1   -0.12    0.37
   1  -7   1   -0.42    0.36
  -2   7  -1   63.05    1.75
  -2   7  -1   59.69    1.55
  -2   7  -1   62.69    1.38
  -2   7  -1   63.78    1.76
  -2   7  -1   63.03    1.67
  -2   7  -1   62.78    1.74
  -2   7  -1   61.01    1.74
  -2   7  -1   60.72    1.70
  -2   7  -1   63.42    1.64
  -2   7  -1   63.92    1.76
   2  -7   1   61.49    1.76
   2  -7   1   63.33    1.74
   2  -7   1   58.81    1.64
   2  -7   1   63.86    1.71
   2  -7   1   62.43    1.38
   2  -7   1   60.74    1.68
   2  -7   1   62.09    1.55
   2  -7   1   61.78    1.69
  -3   7  -1   33.45    1.30
  -3   7  -1   28.08    1.28
  -3   7  -1   27.65    1.22
  -3   7  -1   31.01    1.18
  -3   7  -1   29.26    1.20
  -3   7  -1   30.68    0.96
  -3   7  -1   29.62    1.01
  -3   7  -1   30.27    1.25
  -3   7  -1   31.19    1.19
  -3   7  -1   27.96    1.16
   3  -7   1   30.66    1.01
   3  -7   1   31.72    1.27
   3  -7   1   30.81    1.19
   3  -7   1   29.62    1.26
   3  -7   1   28.79    1.19
   3  -7   1   29.03    1.16
   3  -7   1   30.70    1.20
   3  -7   1   29.96    0.97
   3  -7   1   30.09    1.28
  -4   7  -1    9.57    0.88
  -4   7  -1    7.83    0.70
  -4   7  -1   13.84    1.44
  -4   7  -1    9.44    0.66
  -4   7  -1    8.79    0.94
  -4   7  -1   10.58    0.94
  -4   7  -1    9.91    1.01
  -4   7  -1    9.46    0.92
  -4   7  -1    7.78    0.92
  -4   7  -1   11.74    0.91
   4  -7   1    9.84    0.93
   4  -7   1    7.72    0.82
   4  -7   1   10.15    0.76
   4  -7   1    8.74    0.84
   4  -7   1    8.90    0.64
   4  -7   1   10.67    1.17
   4  -7   1   11.18    0.99
   4  -7   1    8.80    0.93
   4  -7   1    8.61    0.95
   4  -7   1    9.96    0.93
  -5   7  -1    2.82    0.66
  -5   7  -1    3.55    0.71
  -5   7  -1    2.09    0.61
  -5   7  -1    2.01    0.59
  -5   7  -1    1.12    0.96
  -5   7  -1    2.04    0.64
  -5   7  -1    2.51    0.67
  -5   7  -1    2.43    0.53
  -5   7  -1    2.74    0.43
  -5   7  -1    2.45    0.59
   5  -7   1    1.76    0.64
   5  -7   1    1.99    0.67
   5  -7   1    2.92    0.56
   5  -7   1    3.32    0.65
   5  -7   1    2.52    0.42
   5  -7   1    2.41    0.61
   5  -7   1    2.62    0.62
   5  -7   1    3.09    0.85
   5  -7   1    2.78    0.67
   5  -7   1    2.15    0.59
  -6   7  -1    1.12    0.70
  -6   7  -1    0.41    0.62
  -6   7  -1    0.70    0.58
  -6   7  -1    0.50    0.52
  -6   7  -1   -0.01    0.59
  -6   7  -1    0.06    0.62
  -6   7  -1   -0.14    0.35
  -6   7  -1    1.03    0.65
  -6   7  -1   -1.50    0.55
  -6   7  -1    0.16    0.64
   6  -7   1    0.75    0.66
   6  -7   1   -0.10    0.55
   6  -7   1   -0.36    0.67
   6  -7   1   -0.13    0.55
   6  -7   1    0.12    0.61
   6  -7   1    0.51    0.72
   6  -7   1   -0.54    0.55
   6  -7   1    0.09    0.58
   6  -7   1   -0.17    0.58
  -7   7  -1   -0.22    0.63
  -7   7  -1    1.79    0.81
  -7   7  -1   -0.08    0.71
  -7   7  -1    0.90    0.62
  -7   7  -1   -0.16    0.93
  -7   7  -1    0.29    0.57
  -7   7  -1   -0.15    0.61
  -7   7  -1    0.56    0.67
  -7   7  -1   -0.47    0.72
   7  -7   1   -0.57    0.65
   7  -7   1    0.40    0.62
   7  -7   1   -0.16    0.63
   7  -7   1    0.45    0.63
   7  -7   1    0.47    0.65
   7  -7   1    0.16    0.63
   7  -7   1    0.38    0.34
   7  -7   1    0.28    0.34
   7  -7   1    1.27    0.67
   7  -7   1   -0.49    1.03
   7  -7   1    1.18    0.70
  -8   7  -1    0.71    0.75
  -8   7  -1   -0.31    0.77
  -8   7  -1    3.49    1.11
  -8   7  -1   -0.39    1.05
  -8   7  -1    1.87    0.91
  -8   7  -1    0.38    0.76
  -8   7  -1    0.20    0.68
  -8   7  -1    1.31    0.98
   8  -7   1    1.05    0.72
   8  -7   1    0.34    0.94
   8  -7   1    2.68    1.00
   8  -7   1    0.02    0.66
   8  -7   1    1.14    0.84
   8  -7   1    1.39    0.76
   8  -7   1    2.13    0.85
   8  -7   1    1.18    0.30
   8  -7   1    1.14    0.33
   8  -7   1    0.02    0.69
  -9   7  -1    3.28    0.93
  -9   7  -1    2.66    0.82
  -9   7  -1   -1.03    1.92
  -9   7  -1    2.57    0.95
  -9   7  -1    2.53    0.91
  -9   7  -1    0.27    0.81
   9  -7   1    2.43    0.88
   9  -7   1    1.77    1.44
   9  -7   1    2.56    0.93
   9  -7   1    2.90    0.95
   9  -7   1    2.46    0.87
   9  -7   1    2.42    0.82
 -10   7  -1    0.46    0.95
 -10   7  -1    1.15    0.90
 -10   7  -1    0.07    0.88
 -10   7  -1    0.90    0.89
 -10   7  -1   -0.82    0.90
  10  -7   1    1.73    1.08
  10  -7   1    0.28    1.59
  10  -7   1   -1.09    0.85
  10  -7   1   -0.29    1.60
  10  -7   1   -0.71    0.79
  10  -7   1    0.29    0.89
 -11   7  -1    2.55    1.10
 -11   7  -1    2.49    1.08
 -11   7  -1    1.24    1.17
 -11   7  -1    3.20    1.16
  11  -7   1    5.48    1.33
  11  -7   1    4.35    1.21
  11  -7   1    3.12    1.09
  11  -7   1    1.82    1.11
  11  -7   1    2.39    1.03
 -12   7  -1    0.86    1.18
 -12   7  -1    0.36    1.10
 -12   7  -1    2.26    1.27
  12  -7   1    1.88    1.16
  12  -7   1    1.03    1.09
  12  -7   1   -0.95    1.15
  12  -7   1    1.43    1.27
 -13   7  -1    0.06    1.26
 -13   7  -1    0.73    1.33
 -13   7  -1    2.48    1.32
  13  -7   1    0.82    1.40
  13  -7   1   -1.36    1.28
  13  -7   1    0.62    1.27
  13  -7   1    0.80    1.18
 -14   7  -1    2.76    1.48
 -14   7  -1    4.87    1.59
 -14   7  -1   -2.00    1.50
  14  -7   1    0.47    1.62
  14  -7   1   -1.43    1.35
  14  -7   1   -0.32    1.60
  16   6  -1   -2.25    1.38
  16   6  -1    0.20    0.95
 -16  -6   1   -2.14    1.32
 -16  -6   1   -1.42    0.90
 -16  -6   1    0.20    1.59
  15   6  -1   -0.34    0.84
  15   6  -1    0.63    1.25
 -15  -6   1   -0.70    0.82
 -15  -6   1    0.87    1.16
 -15  -6   1    1.95    1.29
  14   6  -1    1.87    1.11
  14   6  -1    0.29    0.75
  14   6  -1   -0.76    0.72
  14   6  -1    1.33    0.84
 -14  -6   1    0.56    0.73
 -14  -6   1    1.29    1.18
 -14  -6   1    1.35    1.07
 -14  -6   1    0.06    0.75
  13   6  -1   -0.84    0.68
  13   6  -1   -0.76    0.63
  13   6  -1   -0.02    0.59
  13   6  -1   -0.76    0.70
  13   6  -1    0.34    0.93
 -13  -6   1   -0.18    0.60
 -13  -6   1   -1.38    0.53
 -13  -6   1   -0.95    0.49
 -13  -6   1   -0.98    1.06
 -13  -6   1    0.41    0.93
 -13  -6   1   -0.24    0.61
 -13  -6   1    0.80    0.49
 -13  -6   1    1.06    0.89
  12   6  -1    4.87    1.00
  12   6  -1    6.26    0.79
  12   6  -1    6.36    0.82
  12   6  -1    7.48    0.82
  12   6  -1    8.43    1.02
 -12  -6   1    8.66    1.03
 -12  -6   1    6.07    0.56
 -12  -6   1    6.51    1.05
 -12  -6   1    7.85    0.74
 -12  -6   1    7.01    0.93
 -12  -6   1    6.06    0.76
 -12  -6   1    6.83    0.66
 -12  -6   1    7.45    0.65
 -12  -6   1    6.01    0.74
  11   6  -1    2.69    0.83
  11   6  -1    2.11    0.57
  11   6  -1    3.63    0.67
  11   6  -1    1.94    0.48
  11   6  -1    1.43    0.60
 -11  -6   1    3.68    0.45
 -11  -6   1    1.54    1.00
 -11  -6   1    2.28    0.52
 -11  -6   1    2.45    0.47
 -11  -6   1    1.58    0.75
 -11  -6   1    2.50    0.57
 -11  -6   1    2.48    0.66
 -11  -6   1    2.11    0.74
  10   6  -1    3.04    0.45
  10   6  -1    1.70    0.76
  10   6  -1    4.17    0.86
  10   6  -1    1.98    0.59
  10   6  -1    2.50    0.55
  10   6  -1    2.23    0.53
 -10  -6   1    2.19    0.52
 -10  -6   1    2.86    0.45
 -10  -6   1    2.99    0.46
 -10  -6   1    2.23    0.66
 -10  -6   1    2.16    0.52
 -10  -6   1    2.40    0.76
 -10  -6   1    2.81    0.41
 -10  -6   1    2.13    0.64
 -10  -6   1    4.19    0.48
   9   6  -1    2.89    0.70
   9   6  -1    4.61    0.54
   9   6  -1    4.86    0.57
   9   6  -1    4.74    0.73
   9   6  -1    5.01    0.68
   9   6  -1    2.80    0.59
   9   6  -1    4.26    0.45
  -9  -6   1    4.33    0.47
  -9  -6   1    6.22    0.97
  -9  -6   1    4.08    0.52
  -9  -6   1    3.28    0.86
  -9  -6   1    4.96    0.56
  -9  -6   1    5.31    0.70
  -9  -6   1    3.90    0.77
  -9  -6   1    5.01    0.54
  -9  -6   1    4.10    0.46
  -9  -6   1    3.81    0.66
  -9  -6   1    5.25    0.58
   8   6  -1    1.55    0.37
   8   6  -1    0.56    0.55
   8   6  -1    1.26    0.39
   8   6  -1    1.82    0.36
   8   6  -1    1.63    0.39
   8   6  -1    1.09    0.49
   8   6  -1    1.20    0.51
  -8  -6   1    1.53    0.39
  -8  -6   1    1.41    0.40
  -8  -6   1    1.73    0.36
  -8  -6   1    1.53    0.48
  -8  -6   1    1.33    0.33
  -8  -6   1    1.50    0.68
  -8  -6   1    1.81    0.36
  -8  -6   1    2.82    0.70
  -8  -6   1    1.28    0.55
  -8  -6   1    2.92    0.78
  -8  -6   1    1.61    0.39
   7   6  -1   -0.10    0.47
   7   6  -1    0.24    0.40
   7   6  -1   -0.55    0.43
   7   6  -1    0.35    0.41
   7   6  -1   -0.37    0.29
   7   6  -1   -0.15    0.28
   7   6  -1   -0.29    0.31
  -7  -6   1    0.25    0.26
  -7  -6   1   -0.26    0.31
  -7  -6   1    0.74    0.55
  -7  -6   1   -0.31    0.35
  -7  -6   1    0.80    0.46
  -7  -6   1   -0.14    0.23
  -7  -6   1    0.14    0.61
  -7  -6   1    0.11    0.54
  -7  -6   1    0.26    0.32
  -7  -6   1    0.18    0.28
  -7  -6   1   -0.08    0.29
  -7  -6   1   -0.11    0.23
   6   6  -1   11.52    0.87
   6   6  -1   11.77    1.00
   6   6  -1   11.31    0.84
   6   6  -1   11.71    0.68
   6   6  -1   11.42    0.55
   6   6  -1   12.44    0.66
   6   6  -1   11.72    0.64
   6   6  -1   12.77    0.56
  -6  -6   1   12.04    0.55
  -6  -6   1   13.61    0.86
  -6  -6   1   12.25    0.90
  -6  -6   1   13.20    0.51
  -6  -6   1   11.83    0.62
  -6  -6   1   12.24    0.58
  -6  -6   1   11.17    0.67
  -6  -6   1   12.87    0.60
  -6  -6   1   11.84    0.92
  -6  -6   1   10.27    0.62
   5   6  -1   -0.27    0.26
   5   6  -1    0.58    0.40
   5   6  -1    0.24    0.48
   5   6  -1    0.02    0.29
   5   6  -1    0.69    0.29
   5   6  -1    0.25    0.27
   5   6  -1    0.17    0.43
   5   6  -1    0.22    0.28
   5   6  -1    0.55    0.46
  -5  -6   1    0.32    0.43
  -5  -6   1    0.12    0.26
  -5  -6   1   -0.19    0.23
  -5  -6   1    0.18    0.29
  -5  -6   1    0.58    0.52
  -5  -6   1   -0.02    0.28
  -5  -6   1    0.05    0.40
  -5  -6   1    0.00    0.29
  -5  -6   1    0.38    0.28
  -5  -6   1   -0.21    0.25
  -5  -6   1    0.63    0.25
   4   6  -1    9.27    0.56
   4   6  -1    8.55    0.64
   4   6  -1    9.34    0.52
   4   6  -1    8.52    0.54
   4   6  -1    9.61    0.74
   4   6  -1    8.55    0.55
   4   6  -1    9.27    0.53
   4   6  -1    8.97    0.75
  -4  -6   1    9.87    0.50
  -4  -6   1   11.00    0.74
  -4  -6   1    8.67    0.53
  -4  -6   1    8.15    0.54
  -4  -6   1    9.69    0.76
  -4  -6   1    9.25    0.45
  -4  -6   1    8.32    0.44
  -4  -6   1    8.53    0.53
  -4  -6   1    8.98    0.50
  -4  -6   1    8.93    0.56
  -4  -6   1    9.68    0.77
  -4  -6   1    8.65    0.71
   3   6  -1    3.52    0.46
   3   6  -1    4.60    0.48
   3   6  -1    3.16    0.47
   3   6  -1    3.06    0.37
   3   6  -1    3.37    0.47
   3   6  -1    2.68    0.38
   3   6  -1    3.58    0.39
   3   6  -1    3.39    0.44
  -3  -6   1    3.38    0.38
  -3  -6   1    3.35    0.43
  -3  -6   1    3.60    0.39
  -3  -6   1    3.29    0.44
  -3  -6   1    3.15    0.28
  -3  -6   1    3.49    0.46
  -3  -6   1    4.99    0.63
  -3  -6   1    2.84    0.45
  -3  -6   1    3.32    0.51
  -3  -6   1    3.28    0.28
  -3  -6   1    3.37    0.40
  -3  -6   1    3.73    0.39
   2   6  -1    1.60    0.35
   2   6  -1    1.77    0.35
   2   6  -1    0.75    0.41
   2   6  -1    1.11    0.40
   2   6  -1    1.36    0.32
   2   6  -1    1.21    0.36
   2   6  -1    1.18    0.32
   2   6  -1    1.44    0.43
   2   6  -1    1.17    0.33
  -2  -6   1    1.04    0.34
  -2  -6   1    1.56    0.40
  -2  -6   1    1.67    0.42
  -2  -6   1    2.02    0.41
  -2  -6   1    1.87    0.36
  -2  -6   1    1.19    0.33
  -2  -6   1    0.94    0.33
  -2  -6   1    1.11    0.31
  -2  -6   1    0.74    0.32
   1   6  -1   -0.10    0.34
   1   6  -1   -0.04    0.31
   1   6  -1   -0.50    0.37
   1   6  -1    0.09    0.41
   1   6  -1    0.17    0.33
   1   6  -1   -0.33    0.30
   1   6  -1   -0.13    0.31
  -1  -6   1    0.03    0.32
  -1  -6   1    0.31    0.34
  -1  -6   1   -0.01    0.35
  -1  -6   1    0.50    0.30
  -1  -6   1   -0.12    0.32
  -1  -6   1    0.30    0.34
  -1  -6   1    0.00    0.28
  -1  -6   1    0.17    0.30
   0   6  -1    1.63    0.41
   0   6  -1    2.19    0.42
   0   6  -1    1.88    0.41
   0   6  -1    1.49    0.36
   0   6  -1    1.64    0.17
   0   6  -1    1.26    0.38
   0   6  -1    1.91    0.41
   0   6  -1    1.60    0.42
   0   6  -1    1.03    0.33
   0   6  -1    1.94    0.41
   0  -6   1    1.70    0.40
   0  -6   1    2.08    0.40
   0  -6   1    2.09    0.43
   0  -6   1    1.77    0.21
   0  -6   1    1.48    0.39
   0  -6   1    2.15    0.42
   0  -6   1    1.42    0.37
   0  -6   1    1.22    0.39
   0  -6   1    1.47    0.38
   0  -6   1    1.47    0.38
  -1   6  -1   25.99    0.95
  -1   6  -1   26.02    0.99
  -1   6  -1   25.70    1.02
  -1   6  -1   23.76    1.16
  -1   6  -1   25.82    0.91
  -1   6  -1   25.73    0.99
  -1   6  -1   26.52    0.99
  -1   6  -1   26.93    0.98
  -1   6  -1   26.32    0.67
   1  -6   1   24.36    0.95
   1  -6   1   24.53    0.97
   1  -6   1   25.56    0.67
   1  -6   1   27.44    0.98
   1  -6   1   26.54    1.01
   1  -6   1   25.25    0.98
   1  -6   1   26.46    1.01
   1  -6   1   25.41    1.01
   1  -6   1   27.45    0.98
   1  -6   1   25.09    0.88
  -2   6  -1   60.37    1.47
  -2   6  -1   59.45    1.58
  -2   6  -1   60.42    1.65
  -2   6  -1   60.20    1.32
  -2   6  -1   61.15    1.64
  -2   6  -1   60.58    1.60
  -2   6  -1   58.69    1.62
  -2   6  -1   61.52    1.55
  -2   6  -1   61.24    1.57
   2  -6   1   59.95    1.59
   2  -6   1   59.70    1.33
   2  -6   1   60.69    1.59
   2  -6   1   59.66    1.62
   2  -6   1   60.82    1.56
   2  -6   1   60.61    1.45
   2  -6   1   62.02    1.59
  -3   6  -1    0.16    0.43
  -3   6  -1    0.19    0.38
  -3   6  -1    0.03    0.31
  -3   6  -1    0.00    0.32
  -3   6  -1    0.36    0.46
  -3   6  -1   -0.14    0.43
  -3   6  -1   -0.31    0.37
  -3   6  -1   -0.23    0.41
  -3   6  -1    0.10    0.40
   3  -6   1    1.23    0.47
   3  -6   1    0.02    0.42
   3  -6   1    0.27    0.54
   3  -6   1   -0.49    0.38
   3  -6   1    0.14    0.52
   3  -6   1    0.10    0.41
   3  -6   1   -0.27    0.34
   3  -6   1   -0.37    0.37
   3  -6   1    0.20    0.42
   3  -6   1   -0.55    0.54
  -4   6  -1    0.11    0.47
  -4   6  -1    0.70    0.50
  -4   6  -1    0.45    0.49
  -4   6  -1   -0.22    0.40
  -4   6  -1    0.02    0.44
  -4   6  -1    0.28    0.44
  -4   6  -1    0.45    0.32
  -4   6  -1   -0.18    0.35
  -4   6  -1   -0.66    0.45
  -4   6  -1   -0.02    0.41
   4  -6   1    0.44    0.47
   4  -6   1    0.97    0.38
   4  -6   1    0.12    0.35
   4  -6   1    0.37    0.66
   4  -6   1    0.25    0.43
   4  -6   1    0.50    0.47
   4  -6   1   -0.33    0.42
   4  -6   1    0.13    0.52
   4  -6   1    0.23    0.44
   4  -6   1    0.08    0.41
  -5   6  -1    2.51    0.77
  -5   6  -1    1.65    0.49
  -5   6  -1    1.07    0.50
  -5   6  -1    2.39    0.61
  -5   6  -1    1.63    0.55
  -5   6  -1    1.51    0.56
  -5   6  -1    1.59    0.46
  -5   6  -1    1.62    0.58
  -5   6  -1    2.33    0.60
   5  -6   1    2.22    0.51
   5  -6   1    3.93    1.04
   5  -6   1    1.50    0.50
   5  -6   1    1.88    0.33
   5  -6   1    0.92    0.50
   5  -6   1    1.49    0.52
   5  -6   1    1.05    0.48
   5  -6   1    1.62    0.56
   5  -6   1    2.45    0.59
   5  -6   1    1.54    0.49
  -6   6  -1   -0.03    0.58
  -6   6  -1   -0.08    0.45
  -6   6  -1    0.28    0.28
  -6   6  -1    0.64    0.56
  -6   6  -1   -0.32    0.48
  -6   6  -1    0.82    0.57
  -6   6  -1    0.16    0.53
  -6   6  -1    0.28    0.50
  -6   6  -1    1.18    0.61
  -6   6  -1   -0.76    0.55
   6  -6   1   -0.07    0.48
   6  -6   1    0.27    0.29
   6  -6   1    0.24    0.50
   6  -6   1   -0.28    0.52
   6  -6   1   -0.45    0.56
   6  -6   1   -0.60    0.58
   6  -6   1   -0.33    0.50
   6  -6   1    0.38    0.58
   6  -6   1   -0.67    0.87
   6  -6   1    0.33    0.29
   6  -6   1   -0.52    0.69
  -7   6  -1   17.75    1.26
  -7   6  -1   16.66    1.14
  -7   6  -1   13.95    1.21
  -7   6  -1   19.30    1.18
  -7   6  -1   18.83    1.30
  -7   6  -1   15.22    1.15
  -7   6  -1   18.35    1.31
  -7   6  -1   16.48    1.21
  -7   6  -1   19.06    1.14
   7  -6   1   16.07    1.16
   7  -6   1   16.04    1.15
   7  -6   1   20.49    1.50
   7  -6   1   17.37    0.60
   7  -6   1   17.54    1.14
   7  -6   1   15.93    1.32
   7  -6   1   17.06    0.62
   7  -6   1   17.13    1.17
   7  -6   1   17.75    1.16
   7  -6   1   14.03    1.18
   7  -6   1   15.69    1.27
  -8   6  -1   -0.99    0.77
  -8   6  -1   -1.18    0.71
  -8   6  -1    1.09    1.04
  -8   6  -1    0.57    0.67
  -8   6  -1   -0.73    0.55
  -8   6  -1   -0.36    0.59
  -8   6  -1    0.23    0.78
  -8   6  -1   -0.37    0.64
  -8   6  -1    0.24    0.62
   8  -6   1   -0.63    0.73
   8  -6   1   -1.25    0.58
   8  -6   1    0.46    0.71
   8  -6   1   -0.59    0.68
   8  -6   1    0.98    0.72
   8  -6   1   -0.32    0.64
   8  -6   1   -0.31    0.79
   8  -6   1    0.34    0.23
   8  -6   1    0.70    0.68
   8  -6   1    0.22    0.72
   8  -6   1    0.02    0.21
  -9   6  -1    3.35    0.79
  -9   6  -1    4.17    0.87
  -9   6  -1    3.69    0.77
  -9   6  -1    2.58    0.81
  -9   6  -1    4.60    0.95
  -9   6  -1    3.27    0.79
   9  -6   1    4.81    0.82
   9  -6   1    3.20    1.01
   9  -6   1    3.94    0.83
   9  -6   1    4.11    0.97
   9  -6   1    3.09    0.88
   9  -6   1    4.74    0.90
   9  -6   1    4.13    0.87
 -10   6  -1    0.93    0.88
 -10   6  -1    0.22    0.79
 -10   6  -1    2.27    0.99
 -10   6  -1    2.33    0.81
 -10   6  -1    1.88    0.86
 -10   6  -1   -0.54    0.91
  10  -6   1    1.99    0.88
  10  -6   1    0.49    0.89
  10  -6   1    0.36    0.82
  10  -6   1    2.48    0.84
  10  -6   1    1.63    0.85
  10  -6   1    0.30    0.93
 -11   6  -1    0.37    0.93
 -11   6  -1   -0.57    0.92
 -11   6  -1    0.42    0.93
 -11   6  -1   -0.86    0.99
 -11   6  -1   -0.77    1.03
  11  -6   1    0.87    0.85
  11  -6   1   -0.91    0.84
  11  -6   1   -0.93    1.03
  11  -6   1    0.81    1.02
  11  -6   1    0.11    1.17
  11  -6   1    1.55    0.91
 -12   6  -1   -0.70    1.11
 -12   6  -1    1.14    1.07
 -12   6  -1   -0.56    0.99
  12  -6   1    0.32    0.94
  12  -6   1   -0.24    1.11
  12  -6   1    0.47    0.98
  12  -6   1   -0.21    0.95
 -13   6  -1   -1.97    1.16
 -13   6  -1   -0.86    1.21
 -13   6  -1   -1.44    1.19
  13  -6   1    0.19    1.30
  13  -6   1    0.47    1.14
  13  -6   1   -0.51    1.30
  13  -6   1    0.94    1.11
 -14   6  -1    3.02    1.45
 -14   6  -1    1.84    1.39
 -14   6  -1   -1.29    1.45
  14  -6   1   -1.11    1.40
  14  -6   1    0.11    1.27
  14  -6   1    2.03    1.50
  14  -6   1    0.96    1.39
  16   5  -1   -0.15    0.98
  16   5  -1   -0.45    1.32
 -16  -5   1    0.81    1.34
 -16  -5   1    1.60    0.99
 -16  -5   1    2.45    1.38
  15   5  -1    0.77    1.24
  15   5  -1   -0.95    0.83
 -15  -5   1    0.69    1.15
 -15  -5   1    1.03    1.23
 -15  -5   1    0.20    0.88
  14   5  -1   -0.02    0.75
  14   5  -1    1.48    1.06
  14   5  -1    0.06    0.73
  14   5  -1   -0.88    0.66
 -14  -5   1   -0.16    0.75
 -14  -5   1    1.44    1.12
 -14  -5   1   -0.02    0.72
 -14  -5   1    0.94    0.77
 -14  -5   1   -0.29    0.61
 -14  -5   1   -1.25    1.00
  13   5  -1    1.45    0.65
  13   5  -1    1.41    0.68
  13   5  -1    2.76    0.76
  13   5  -1    2.88    1.00
  13   5  -1    3.31    0.69
 -13  -5   1    1.97    0.68
 -13  -5   1    2.15    0.72
 -13  -5   1    3.00    0.72
 -13  -5   1    1.86    0.63
 -13  -5   1    3.29    0.99
 -13  -5   1    1.40    0.57
 -13  -5   1    2.53    1.08
 -13  -5   1    2.04    0.53
 -13  -5   1    1.88    0.82
  12   5  -1    0.44    0.54
  12   5  -1   -0.53    0.57
  12   5  -1   -0.33    0.59
  12   5  -1   -0.06    0.89
  12   5  -1   -0.09    0.57
 -12  -5   1    0.29    0.79
 -12  -5   1    0.45    0.48
 -12  -5   1   -0.17    0.58
 -12  -5   1   -0.09    0.91
 -12  -5   1   -0.80    0.52
 -12  -5   1    0.01    0.45
 -12  -5   1    0.09    0.71
 -12  -5   1    0.90    0.57
 -12  -5   1    0.45    0.54
  11   5  -1    0.07    0.73
  11   5  -1   -0.39    0.48
  11   5  -1    0.23    0.51
  11   5  -1    0.59    0.52
  11   5  -1   -0.05    0.47
 -11  -5   1    0.13    0.63
 -11  -5   1    0.15    0.51
 -11  -5   1    0.27    0.50
 -11  -5   1   -0.19    0.44
 -11  -5   1    0.32    0.48
 -11  -5   1    0.65    0.50
 -11  -5   1    0.07    0.40
 -11  -5   1   -0.69    0.74
 -11  -5   1    0.32    0.67
  10   5  -1    3.69    0.57
  10   5  -1    2.98    0.46
  10   5  -1    3.11    0.58
  10   5  -1    2.84    0.55
  10   5  -1    2.48    0.75
  10   5  -1    1.58    0.76
 -10  -5   1    2.21    0.76
 -10  -5   1    3.07    0.62
 -10  -5   1    3.00    0.50
 -10  -5   1    3.64    0.47
 -10  -5   1    2.72    0.53
 -10  -5   1    3.51    0.55
 -10  -5   1    3.46    0.71
 -10  -5   1    3.20    0.44
   9   5  -1    0.47    0.40
   9   5  -1    0.57    0.39
   9   5  -1    0.74    0.34
   9   5  -1    0.35    0.34
   9   5  -1   -0.39    0.59
   9   5  -1    1.00    0.60
   9   5  -1    0.49    0.45
  -9  -5   1    0.61    0.40
  -9  -5   1    1.00    0.77
  -9  -5   1    0.78    0.37
  -9  -5   1    0.60    0.42
  -9  -5   1   -0.11    0.61
  -9  -5   1    0.58    0.50
  -9  -5   1    0.73    0.37
  -9  -5   1    1.49    0.51
  -9  -5   1    0.06    0.36
  -9  -5   1    0.58    0.71
  -9  -5   1    0.41    0.32
   8   5  -1    0.33    0.29
   8   5  -1    0.59    0.32
   8   5  -1    0.91    0.44
   8   5  -1    0.36    0.36
   8   5  -1    0.93    0.54
   8   5  -1    0.44    0.37
   8   5  -1    1.18    0.53
  -8  -5   1    0.66    0.32
  -8  -5   1    0.43    0.34
  -8  -5   1    0.51    0.48
  -8  -5   1    1.29    0.47
  -8  -5   1    0.83    0.33
  -8  -5   1    2.03    0.68
  -8  -5   1    0.86    0.25
  -8  -5   1    0.27    0.60
  -8  -5   1    0.86    0.37
  -8  -5   1    0.66    0.35
  -8  -5   1   -0.07    0.64
  -8  -5   1    1.04    0.31
   7   5  -1    1.74    0.61
   7   5  -1    2.29    0.47
   7   5  -1    2.42    0.57
   7   5  -1    2.06    0.37
   7   5  -1    1.91    0.52
   7   5  -1    2.59    0.48
   7   5  -1    2.05    0.33
  -7  -5   1    2.20    0.31
  -7  -5   1    2.37    0.27
  -7  -5   1    1.83    0.39
  -7  -5   1    2.39    0.34
  -7  -5   1    2.06    0.34
  -7  -5   1    2.18    0.45
  -7  -5   1    2.78    0.49
  -7  -5   1    2.08    0.37
  -7  -5   1    1.79    0.54
  -7  -5   1    2.33    0.60
  -7  -5   1    1.82    0.36
  -7  -5   1    2.75    0.59
  -7  -5   1    2.46    0.28
   6   5  -1    0.37    0.29
   6   5  -1    0.24    0.38
   6   5  -1    0.29    0.25
   6   5  -1    0.32    0.25
   6   5  -1    0.69    0.35
   6   5  -1    0.40    0.47
  -6  -5   1    0.56    0.29
  -6  -5   1    0.43    0.40
  -6  -5   1    0.39    0.21
  -6  -5   1    0.49    0.26
  -6  -5   1    0.87    0.29
  -6  -5   1    0.62    0.25
  -6  -5   1    0.19    0.45
  -6  -5   1   -0.22    0.50
  -6  -5   1   -0.05    0.41
  -6  -5   1    0.29    0.29
  -6  -5   1    0.00    0.31
  -6  -5   1    0.67    0.27
   5   5  -1    1.26    0.28
   5   5  -1    1.46    0.51
   5   5  -1    1.36    0.45
   5   5  -1    1.35    0.27
   5   5  -1    1.08    0.29
   5   5  -1    1.44    0.30
   5   5  -1    1.80    0.34
   5   5  -1    1.01    0.41
   5   5  -1    1.63    0.28
  -5  -5   1    1.31    0.30
  -5  -5   1    1.77    0.29
  -5  -5   1    1.53    0.28
  -5  -5   1    1.15    0.22
  -5  -5   1    1.43    0.24
  -5  -5   1    1.15    0.44
  -5  -5   1    1.49    0.44
  -5  -5   1    0.96    0.24
  -5  -5   1    1.24    0.30
  -5  -5   1    0.65    0.41
   4   5  -1   38.40    0.97
   4   5  -1   37.30    1.19
   4   5  -1   37.83    1.16
   4   5  -1   37.44    0.94
   4   5  -1   38.36    0.96
   4   5  -1   38.86    0.93
   4   5  -1   38.08    1.19
   4   5  -1   38.59    0.93
   4   5  -1   40.06    0.98
   4   5  -1   37.79    0.97
  -4  -5   1   38.53    0.89
  -4  -5   1   38.58    0.94
  -4  -5   1   38.02    1.18
  -4  -5   1   38.22    0.94
  -4  -5   1   38.12    0.95
  -4  -5   1   36.84    0.97
  -4  -5   1   38.95    0.90
  -4  -5   1   38.80    0.94
  -4  -5   1   39.18    1.15
  -4  -5   1   39.19    1.21
  -4  -5   1   39.97    0.98
   3   5  -1    0.76    0.26
   3   5  -1    0.33    0.35
   3   5  -1    0.68    0.25
   3   5  -1    0.74    0.27
   3   5  -1    0.79    0.26
   3   5  -1    0.96    0.28
   3   5  -1    0.56    0.24
  -3  -5   1    0.31    0.33
  -3  -5   1    0.64    0.27
  -3  -5   1    0.42    0.35
  -3  -5   1    0.94    0.41
  -3  -5   1    0.27    0.24
  -3  -5   1    0.38    0.20
  -3  -5   1    0.73    0.25
  -3  -5   1    0.85    0.20
  -3  -5   1    0.50    0.26
  -3  -5   1    0.35    0.25
  -3  -5   1   -0.01    0.37
  -3  -5   1    0.60    0.26
   2   5  -1   65.39    1.43
   2   5  -1   60.26    1.55
   2   5  -1   66.98    1.52
   2   5  -1   64.59    1.42
   2   5  -1   61.61    1.41
   2   5  -1   64.04    1.53
   2   5  -1   63.52    1.40
  -2  -5   1   64.78    1.42
  -2  -5   1   58.27    1.72
  -2  -5   1   63.42    1.49
  -2  -5   1   65.91    1.42
  -2  -5   1   67.38    1.54
  -2  -5   1   59.35    1.49
  -2  -5   1   64.55    1.39
  -2  -5   1   65.07    1.16
  -2  -5   1   66.04    1.43
  -2  -5   1   61.74    1.42
  -2  -5   1   63.92    1.55
  -2  -5   1   65.94    1.16
   1   5  -1   11.32    0.59
   1   5  -1   10.90    0.66
   1   5  -1   10.79    0.79
   1   5  -1   10.53    0.59
   1   5  -1   10.61    0.58
   1   5  -1   11.08    0.62
   1   5  -1   10.74    0.60
  -1  -5   1   10.82    0.58
  -1  -5   1   10.94    0.57
  -1  -5   1   12.12    0.65
  -1  -5   1   11.46    0.61
  -1  -5   1   11.55    0.60
  -1  -5   1   11.37    0.57
  -1  -5   1   10.83    0.64
  -1  -5   1   11.36    0.60
   0   5  -1   22.49    0.82
   0   5  -1   22.68    0.86
   0   5  -1   22.81    0.49
   0   5  -1   21.40    0.81
   0   5  -1   22.15    0.82
   0   5  -1   21.13    0.83
   0   5  -1   23.63    0.87
   0   5  -1   23.60    0.83
   0   5  -1   23.08    0.81
   0  -5   1   22.31    0.81
   0  -5   1   22.35    0.49
   0  -5   1   24.16    0.84
   0  -5   1   23.99    0.83
   0  -5   1   23.83    0.83
   0  -5   1   22.85    0.85
   0  -5   1   22.57    0.83
   0  -5   1   22.98    0.84
  -1   5  -1   31.37    1.02
  -1   5  -1   31.88    1.03
  -1   5  -1   31.96    0.96
  -1   5  -1   32.47    0.75
  -1   5  -1   33.01    1.03
  -1   5  -1   33.16    1.07
  -1   5  -1   31.49    1.05
  -1   5  -1   32.36    1.01
   1  -5   1   33.67    1.05
   1  -5   1   30.34    0.98
   1  -5   1   30.29    1.00
   1  -5   1   32.09    0.75
   1  -5   1   33.21    1.05
   1  -5   1   31.62    1.18
   1  -5   1   33.47    1.03
   1  -5   1   32.08    0.95
   1  -5   1   31.45    1.00
   1  -5   1   32.54    1.03
  -2   5  -1   11.34    0.91
  -2   5  -1    9.02    0.70
  -2   5  -1    9.94    0.68
  -2   5  -1    7.95    0.65
  -2   5  -1    8.26    0.66
  -2   5  -1    9.27    0.49
   2  -5   1    9.10    0.66
   2  -5   1    7.86    0.67
   2  -5   1    8.51    0.69
   2  -5   1    7.59    0.63
   2  -5   1    8.64    0.49
   2  -5   1    8.99    0.69
   2  -5   1    9.03    0.67
   2  -5   1    8.50    0.55
   2  -5   1    8.10    0.65
  -3   5  -1   12.36    0.81
  -3   5  -1   12.34    0.77
  -3   5  -1   13.15    0.81
  -3   5  -1   11.72    0.75
  -3   5  -1   12.24    0.77
  -3   5  -1   13.66    0.81
  -3   5  -1   14.12    0.62
  -3   5  -1   14.00    0.80
   3  -5   1   12.63    0.78
   3  -5   1   13.41    0.79
   3  -5   1   13.36    0.64
   3  -5   1   14.53    0.79
   3  -5   1   12.10    0.75
   3  -5   1   13.74    0.78
   3  -5   1   12.77    0.82
   3  -5   1   12.39    0.80
   3  -5   1   12.85    0.59
  -4   5  -1    5.44    0.57
  -4   5  -1    5.58    0.60
  -4   5  -1    5.40    1.05
  -4   5  -1    4.37    0.59
  -4   5  -1    4.88    0.47
  -4   5  -1    4.81    0.57
  -4   5  -1    4.80    0.55
  -4   5  -1    5.67    0.75
  -4   5  -1    4.64    0.54
  -4   5  -1    5.59    0.60
   4  -5   1    5.53    0.71
   4  -5   1    4.60    0.60
   4  -5   1    5.79    0.60
   4  -5   1    4.86    0.65
   4  -5   1    5.44    0.73
   4  -5   1    6.03    0.68
   4  -5   1    5.51    0.47
   4  -5   1    5.49    0.70
   4  -5   1    7.45    0.87
   4  -5   1    7.04    0.94
  -5   5  -1    4.94    0.63
  -5   5  -1    3.10    0.97
  -5   5  -1    5.67    0.66
  -5   5  -1    4.87    0.59
  -5   5  -1    5.24    0.45
  -5   5  -1    4.74    0.65
  -5   5  -1    5.77    0.65
  -5   5  -1    5.56    0.64
  -5   5  -1    4.96    0.68
  -5   5  -1    4.75    0.53
   5  -5   1    4.71    0.43
   5  -5   1    6.35    0.76
   5  -5   1    4.26    0.53
   5  -5   1    4.42    0.58
   5  -5   1    4.13    0.57
   5  -5   1    4.61    0.57
   5  -5   1    6.02    0.65
   5  -5   1    3.88    0.56
   5  -5   1    6.09    0.66
   5  -5   1    6.49    0.77
  -6   5  -1    1.30    0.56
  -6   5  -1    1.38    0.49
  -6   5  -1    0.60    0.53
  -6   5  -1    1.25    0.58
  -6   5  -1    1.22    0.56
  -6   5  -1    0.95    0.46
  -6   5  -1    0.64    0.56
  -6   5  -1    0.99    0.49
  -6   5  -1    1.45    0.57
   6  -5   1    0.81    0.95
   6  -5   1    1.30    0.27
   6  -5   1    0.50    0.52
   6  -5   1    2.17    0.78
   6  -5   1    1.32    0.63
   6  -5   1    0.74    0.45
   6  -5   1    1.44    0.50
   6  -5   1    0.73    0.51
   6  -5   1    1.15    0.51
   6  -5   1    0.39    0.43
   6  -5   1    0.68    0.25
  -7   5  -1    2.10    0.64
  -7   5  -1    1.04    0.61
  -7   5  -1    1.39    0.51
  -7   5  -1    1.30    0.52
  -7   5  -1    1.42    0.64
  -7   5  -1    1.38    0.54
  -7   5  -1    1.11    0.61
  -7   5  -1    0.25    0.58
  -7   5  -1    2.31    0.59
   7  -5   1    0.94    0.57
   7  -5   1    2.31    0.63
   7  -5   1    0.99    0.59
   7  -5   1    1.75    0.63
   7  -5   1    1.27    0.23
   7  -5   1    1.41    0.60
   7  -5   1    1.42    0.63
   7  -5   1    1.61    0.25
   7  -5   1    1.14    0.56
   7  -5   1    0.73    0.55
   7  -5   1    0.55    0.59
  -8   5  -1    2.97    0.85
  -8   5  -1    3.49    0.82
  -8   5  -1    1.22    0.63
  -8   5  -1    2.54    0.76
  -8   5  -1    1.61    0.78
  -8   5  -1    2.26    0.63
  -8   5  -1    2.94    0.75
  -8   5  -1    3.11    0.67
  -8   5  -1    2.38    0.57
   8  -5   1    1.33    0.73
   8  -5   1    2.34    0.75
   8  -5   1    2.62    0.72
   8  -5   1    2.44    0.64
   8  -5   1    2.44    0.70
   8  -5   1    3.59    0.77
   8  -5   1    1.54    0.54
   8  -5   1    0.67    0.63
   8  -5   1    2.57    0.76
  -9   5  -1    3.07    0.78
  -9   5  -1    2.26    0.91
  -9   5  -1    3.18    0.83
  -9   5  -1    2.35    0.77
  -9   5  -1    2.49    0.77
  -9   5  -1    4.32    0.88
  -9   5  -1    2.60    0.84
  -9   5  -1    3.59    0.81
  -9   5  -1    3.37    0.76
   9  -5   1    2.55    0.72
   9  -5   1    4.27    0.86
   9  -5   1    2.26    0.77
   9  -5   1    1.65    0.83
   9  -5   1    3.34    0.68
   9  -5   1    3.92    0.82
   9  -5   1    1.32    0.76
   9  -5   1    3.41    0.75
 -10   5  -1    9.23    1.01
 -10   5  -1    9.37    1.05
 -10   5  -1    9.02    1.12
 -10   5  -1    7.52    1.01
 -10   5  -1    8.16    0.99
 -10   5  -1    9.57    1.25
  10  -5   1    9.58    1.04
  10  -5   1    8.78    0.99
  10  -5   1    9.23    1.15
  10  -5   1    8.80    1.08
  10  -5   1   10.19    1.33
  10  -5   1    9.75    1.02
 -11   5  -1   -2.29    0.89
 -11   5  -1   -0.37    0.81
 -11   5  -1    1.08    0.84
 -11   5  -1   -0.29    0.89
 -11   5  -1    0.49    0.84
 -11   5  -1   -0.96    0.97
  11  -5   1   -1.01    0.82
  11  -5   1    1.17    1.08
  11  -5   1    1.06    0.84
  11  -5   1   -0.44    0.90
  11  -5   1   -1.13    0.85
  11  -5   1    0.52    0.76
 -12   5  -1   -0.23    1.03
 -12   5  -1    0.10    0.93
 -12   5  -1    0.90    1.21
 -12   5  -1   -0.71    0.96
  12  -5   1   -0.29    0.87
  12  -5   1   -0.07    1.05
  12  -5   1    1.45    0.96
  12  -5   1   -0.96    1.00
 -13   5  -1   -2.97    1.11
 -13   5  -1    0.79    1.08
 -13   5  -1    0.01    1.14
  13  -5   1    1.14    1.03
  13  -5   1    1.20    1.21
  13  -5   1   -1.17    1.05
  13  -5   1   -0.77    1.16
 -14   5  -1    0.53    1.38
 -14   5  -1   -0.96    1.20
 -14   5  -1   -0.25    1.34
  14  -5   1    1.10    1.41
  14  -5   1    0.60    1.26
  14  -5   1    0.63    1.24
  14  -5   1    1.50    1.19
 -15   5  -1    4.08    1.44
 -15   5  -1   -0.10    1.50
 -15   5  -1   -1.12    1.46
  15  -5   1    2.90    1.59
  15  -5   1   -1.97    1.28
  15  -5   1    0.63    1.36
  15  -5   1    2.16    1.40
  16   4  -1   -0.65    1.35
  16   4  -1   -0.80    1.01
 -16  -4   1    0.67    1.40
 -16  -4   1   -0.05    0.98
 -16  -4   1   -1.05    1.37
  15   4  -1   -1.84    1.14
  15   4  -1   -1.41    0.85
 -15  -4   1   -1.27    1.11
 -15  -4   1    1.11    0.85
 -15  -4   1    2.92    1.29
  14   4  -1   -0.12    0.82
  14   4  -1   -0.22    0.74
  14   4  -1   -0.73    1.01
 -14  -4   1   -0.74    0.68
 -14  -4   1   -0.76    0.71
 -14  -4   1   -0.65    0.98
 -14  -4   1    1.23    0.63
 -14  -4   1    0.71    0.75
 -14  -4   1    0.96    0.68
 -14  -4   1    2.95    1.17
  13   4  -1    0.45    0.68
  13   4  -1    1.70    0.58
  13   4  -1    0.96    0.93
  13   4  -1    0.30    0.67
  13   4  -1    1.46    0.70
 -13  -4   1    0.98    1.01
 -13  -4   1    0.98    0.69
 -13  -4   1    1.29    0.58
 -13  -4   1    0.44    0.65
 -13  -4   1   -0.39    0.92
 -13  -4   1    1.30    0.58
 -13  -4   1    1.44    0.67
 -13  -4   1    0.29    0.63
 -13  -4   1    0.76    0.69
  12   4  -1    0.57    0.56
  12   4  -1   -0.24    0.48
  12   4  -1    1.11    0.58
  12   4  -1    1.11    0.49
  12   4  -1    0.96    0.61
 -12  -4   1    0.41    0.56
 -12  -4   1    1.23    0.60
 -12  -4   1    0.33    0.57
 -12  -4   1    0.71    0.56
 -12  -4   1   -0.16    0.47
 -12  -4   1    1.30    0.94
 -12  -4   1    0.33    0.57
 -12  -4   1    0.78    0.80
 -12  -4   1    0.86    0.46
 -12  -4   1   -0.36    0.50
  11   4  -1   -0.31    0.68
  11   4  -1    0.22    0.45
  11   4  -1   -0.17    0.49
  11   4  -1    0.46    0.53
  11   4  -1   -0.32    0.45
  11   4  -1   -0.09    0.39
 -11  -4   1    0.17    0.46
 -11  -4   1   -0.09    0.48
 -11  -4   1   -0.21    0.66
 -11  -4   1   -0.47    0.72
 -11  -4   1    0.09    0.42
 -11  -4   1    0.32    0.40
 -11  -4   1    0.94    0.54
 -11  -4   1    0.14    0.50
 -11  -4   1    0.74    0.51
 -11  -4   1   -0.50    0.47
  10   4  -1    5.54    0.88
  10   4  -1    4.67    0.62
  10   4  -1    4.54    0.57
  10   4  -1    6.90    0.76
  10   4  -1    5.20    0.60
  10   4  -1    4.28    0.58
  10   4  -1    6.38    0.67
  10   4  -1    6.18    0.87
 -10  -4   1    5.34    0.54
 -10  -4   1    4.18    0.54
 -10  -4   1    5.11    0.58
 -10  -4   1    7.68    0.99
 -10  -4   1    4.51    0.74
 -10  -4   1    4.98    0.54
 -10  -4   1    5.95    0.77
 -10  -4   1    5.31    0.60
 -10  -4   1    4.56    0.88
 -10  -4   1    5.53    0.57
 -10  -4   1    6.10    0.56
 -10  -4   1    5.27    0.62
   9   4  -1    1.15    0.66
   9   4  -1    1.03    0.43
   9   4  -1    1.57    0.68
   9   4  -1    1.56    0.39
   9   4  -1    0.66    0.40
   9   4  -1    0.84    0.44
   9   4  -1    1.19    0.37
  -9  -4   1    0.86    0.41
  -9  -4   1    1.11    0.39
  -9  -4   1    0.72    0.75
  -9  -4   1    1.05    0.33
  -9  -4   1    1.42    0.36
  -9  -4   1    1.12    0.37
  -9  -4   1    0.82    0.30
  -9  -4   1    0.99    0.46
  -9  -4   1    0.13    0.74
  -9  -4   1    1.61    0.57
  -9  -4   1    0.96    0.42
  -9  -4   1    1.09    0.65
  -9  -4   1    0.89    0.36
   8   4  -1    0.82    0.40
   8   4  -1    2.16    0.59
   8   4  -1    1.07    0.45
   8   4  -1    1.59    0.38
   8   4  -1    1.52    0.34
   8   4  -1    0.91    0.53
   8   4  -1    1.31    0.32
  -8  -4   1    1.12    0.34
  -8  -4   1    1.66    0.35
  -8  -4   1    1.85    0.39
  -8  -4   1    1.48    0.44
  -8  -4   1    1.87    0.67
  -8  -4   1    1.34    0.46
  -8  -4   1    1.47    0.39
  -8  -4   1    0.97    0.61
  -8  -4   1    2.25    0.33
  -8  -4   1    2.06    0.69
  -8  -4   1    1.37    0.28
  -8  -4   1    1.92    0.30
  -8  -4   1    1.75    0.39
   7   4  -1    1.64    0.40
   7   4  -1    1.53    0.41
   7   4  -1    1.96    0.47
   7   4  -1    1.38    0.35
   7   4  -1    1.55    0.29
   7   4  -1    1.50    0.30
   7   4  -1    1.49    0.51
  -7  -4   1    1.18    0.40
  -7  -4   1    1.23    0.30
  -7  -4   1    2.20    0.57
  -7  -4   1    1.37    0.25
  -7  -4   1    1.27    0.53
  -7  -4   1    0.66    0.39
  -7  -4   1    1.47    0.32
  -7  -4   1    1.48    0.33
  -7  -4   1    1.57    0.29
  -7  -4   1    1.43    0.52
  -7  -4   1    1.93    0.57
  -7  -4   1    1.75    0.25
   6   4  -1    9.23    0.66
   6   4  -1    9.61    0.52
   6   4  -1    9.48    0.53
   6   4  -1    9.95    0.46
   6   4  -1    9.24    0.74
   6   4  -1    9.63    0.47
   6   4  -1    9.15    0.68
  -6  -4   1    9.46    0.51
  -6  -4   1    9.23    0.52
  -6  -4   1    9.56    0.41
  -6  -4   1    9.11    0.51
  -6  -4   1    9.57    0.40
  -6  -4   1    8.83    0.65
  -6  -4   1    8.53    0.50
  -6  -4   1   10.27    0.85
  -6  -4   1    9.60    0.81
  -6  -4   1    9.62    0.49
  -6  -4   1    9.39    0.51
  -6  -4   1   10.98    0.83
  -6  -4   1    9.68    0.64
   5   4  -1    3.11    0.34
   5   4  -1    2.41    0.45
   5   4  -1    3.22    0.44
   5   4  -1    2.59    0.31
   5   4  -1    3.13    0.34
  -5  -4   1    2.80    0.36
  -5  -4   1    2.96    0.38
  -5  -4   1    3.30    0.53
  -5  -4   1    2.94    0.32
  -5  -4   1    3.04    0.37
  -5  -4   1    3.80    0.55
  -5  -4   1    2.93    0.30
  -5  -4   1    2.97    0.40
  -5  -4   1    2.93    0.30
  -5  -4   1    3.17    0.30
  -5  -4   1    3.60    0.43
  -5  -4   1    2.79    0.48
  -5  -4   1    2.80    0.31
   4   4  -1    6.50    0.43
   4   4  -1    7.06    0.59
   4   4  -1    5.99    0.63
   4   4  -1    5.70    0.65
   4   4  -1    7.17    0.49
   4   4  -1    6.71    0.44
   4   4  -1    7.30    0.42
   4   4  -1    6.61    0.43
   4   4  -1    7.62    0.39
   4   4  -1    6.90    0.39
  -4  -4   1    6.67    0.41
  -4  -4   1    7.48    0.42
  -4  -4   1    7.11    0.65
  -4  -4   1    7.32    0.42
  -4  -4   1    7.12    0.65
  -4  -4   1    6.81    0.34
  -4  -4   1    6.75    0.41
  -4  -4   1    7.54    0.56
  -4  -4   1    6.88    0.43
  -4  -4   1    7.53    0.48
  -4  -4   1    7.24    0.35
   3   4  -1   89.90    1.75
   3   4  -1   88.18    1.94
   3   4  -1   90.80    1.92
   3   4  -1   87.88    1.89
   3   4  -1   88.12    1.74
   3   4  -1   90.51    1.73
   3   4  -1   90.60    1.74
   3   4  -1   88.75    1.74
   3   4  -1   88.88    1.71
   3   4  -1   89.83    1.71
  -3  -4   1   90.77    1.72
  -3  -4   1   86.54    1.91
  -3  -4   1   90.43    1.75
  -3  -4   1   89.47    1.71
  -3  -4   1   89.53    1.69
  -3  -4   1   85.53    2.08
  -3  -4   1   88.54    1.68
  -3  -4   1   90.11    1.74
  -3  -4   1   88.59    1.74
  -3  -4   1   88.46    1.75
   2   4  -1    2.62    0.30
   2   4  -1    2.62    0.30
   2   4  -1    2.11    0.27
   2   4  -1    2.66    0.36
   2   4  -1    2.95    0.36
   2   4  -1    2.10    0.28
   2   4  -1    2.37    0.28
  -2  -4   1    2.80    0.28
  -2  -4   1    2.31    0.34
  -2  -4   1    2.15    0.27
  -2  -4   1    1.80    0.34
  -2  -4   1    2.32    0.25
  -2  -4   1    2.28    0.28
  -2  -4   1    2.46    0.25
  -2  -4   1    2.38    0.27
  -2  -4   1    2.43    0.30
  -2  -4   1    2.29    0.38
  -2  -4   1    2.15    0.28
   1   4  -1   47.72    1.08
   1   4  -1   46.93    1.08
   1   4  -1   42.35    1.20
   1   4  -1   46.54    1.16
   1   4  -1   47.49    1.09
   1   4  -1   44.61    1.17
   1   4  -1   46.29    1.12
   1   4  -1   45.82    1.09
  -1  -4   1   46.42    1.07
  -1  -4   1   47.42    1.15
  -1  -4   1   41.26    1.18
  -1  -4   1   45.07    1.08
  -1  -4   1   45.96    1.06
  -1  -4   1   47.66    1.10
  -1  -4   1   44.86    1.18
  -1  -4   1   47.49    1.11
  -1  -4   1   47.52    1.09
   0   4  -1    4.85    0.50
   0   4  -1    4.28    0.53
   0   4  -1    4.16    0.48
   0   4  -1    6.09    0.51
   0   4  -1    5.32    0.22
   0   4  -1    4.71    0.46
   0   4  -1    5.14    0.48
   0   4  -1    4.89    0.61
   0   4  -1    4.52    0.50
   0  -4   1    5.29    0.51
   0  -4   1    5.08    0.22
   0  -4   1    5.10    0.47
   0  -4   1    5.74    0.50
   0  -4   1    4.96    0.50
   0  -4   1    4.13    0.49
   0  -4   1    4.41    0.47
   0  -4   1    4.12    0.49
   0  -4   1    5.17    0.48
   0  -4   1    5.66    0.52
  -1   4  -1    0.34    0.29
  -1   4  -1    0.70    0.19
  -1   4  -1    0.14    0.28
  -1   4  -1    0.71    0.32
  -1   4  -1    0.52    0.32
  -1   4  -1    0.31    0.29
  -1   4  -1    0.72    0.31
  -1   4  -1    0.53    0.31
  -1   4  -1    0.48    0.31
  -1   4  -1    0.58    0.31
   1  -4   1    0.65    0.30
   1  -4   1    0.61    0.28
   1  -4   1    1.01    0.33
   1  -4   1    0.54    0.20
   1  -4   1    0.43    0.30
   1  -4   1    0.04    0.27
   1  -4   1    0.51    0.30
   1  -4   1    0.66    0.33
   1  -4   1    0.40    0.30
   1  -4   1    0.56    0.33
  -2   4  -1   16.09    0.71
  -2   4  -1   16.02    0.74
  -2   4  -1   16.54    0.70
  -2   4  -1   14.82    0.71
  -2   4  -1   14.94    0.60
  -2   4  -1   14.62    0.71
  -2   4  -1   15.04    0.72
  -2   4  -1   15.74    0.57
  -2   4  -1   15.26    0.75
   2  -4   1   16.34    0.73
   2  -4   1   15.95    0.57
   2  -4   1   14.97    0.73
   2  -4   1   15.35    0.73
   2  -4   1   16.04    0.74
   2  -4   1   15.66    0.60
   2  -4   1   15.47    0.76
   2  -4   1   15.61    0.74
   2  -4   1   14.47    0.71
  -3   4  -1   11.02    0.68
  -3   4  -1   10.90    0.68
  -3   4  -1   10.27    0.71
  -3   4  -1   11.02    0.72
  -3   4  -1   10.25    0.69
  -3   4  -1    9.96    0.88
  -3   4  -1   10.94    0.50
  -3   4  -1   10.69    0.59
  -3   4  -1   13.73    0.87
  -3   4  -1   10.81    0.68
   3  -4   1   10.11    0.49
   3  -4   1   10.32    0.70
   3  -4   1   10.17    0.71
   3  -4   1    9.98    0.65
   3  -4   1   10.67    0.58
   3  -4   1   10.24    0.69
   3  -4   1   10.61    0.71
   3  -4   1   11.69    0.69
   3  -4   1   10.80    0.68
  -4   4  -1   22.28    0.94
  -4   4  -1   22.50    0.92
  -4   4  -1   22.36    0.93
  -4   4  -1   23.21    0.93
  -4   4  -1   23.36    0.97
  -4   4  -1   22.16    0.65
  -4   4  -1   21.33    0.94
  -4   4  -1   21.44    0.96
  -4   4  -1   22.30    0.85
   4  -4   1   23.04    0.91
   4  -4   1   22.83    0.94
   4  -4   1   22.46    0.98
   4  -4   1   22.03    0.90
   4  -4   1   22.04    0.98
   4  -4   1   22.94    0.66
   4  -4   1   22.81    0.86
   4  -4   1   22.14    0.94
   4  -4   1   20.73    0.88
  -5   4  -1   87.85    2.06
  -5   4  -1   85.60    2.08
  -5   4  -1   86.55    2.02
  -5   4  -1   84.22    1.99
  -5   4  -1   82.26    2.01
  -5   4  -1   85.67    2.04
  -5   4  -1   87.46    2.16
   5  -4   1   87.42    2.15
   5  -4   1   84.37    1.66
   5  -4   1   86.76    2.01
   5  -4   1   84.57    2.12
   5  -4   1   85.07    2.02
   5  -4   1   88.73    2.00
   5  -4   1   89.80    2.12
   5  -4   1   86.41    2.10
   5  -4   1   84.42    2.03
   5  -4   1   86.56    1.66
   5  -4   1   85.06    2.03
  -6   4  -1    4.18    0.60
  -6   4  -1    3.36    0.60
  -6   4  -1    3.83    0.61
  -6   4  -1    3.17    0.56
  -6   4  -1    3.60    0.56
  -6   4  -1    4.30    0.62
  -6   4  -1    4.49    0.63
  -6   4  -1    4.37    0.61
  -6   4  -1    3.80    0.57
   6  -4   1    3.70    0.54
   6  -4   1    3.88    0.55
   6  -4   1    3.25    0.31
   6  -4   1    2.99    0.51
   6  -4   1    4.25    0.54
   6  -4   1    5.28    0.76
   6  -4   1    3.48    0.57
   6  -4   1    3.37    0.31
   6  -4   1    3.53    0.61
   6  -4   1    3.94    0.60
   6  -4   1    3.53    0.54
  -7   4  -1    8.64    0.90
  -7   4  -1    6.83    0.83
  -7   4  -1    7.93    0.93
  -7   4  -1    8.01    0.87
  -7   4  -1    7.44    0.97
  -7   4  -1    9.10    0.89
  -7   4  -1    6.86    0.90
  -7   4  -1    7.46    0.92
  -7   4  -1    7.41    0.90
   7  -4   1    7.15    0.78
   7  -4   1    8.43    0.94
   7  -4   1    6.85    0.92
   7  -4   1    7.66    0.89
   7  -4   1    8.46    0.83
   7  -4   1    8.10    0.84
   7  -4   1    7.22    0.85
   7  -4   1    7.89    0.93
   7  -4   1    9.26    0.91
  -8   4  -1   10.28    1.12
  -8   4  -1   11.30    1.10
  -8   4  -1   10.61    1.07
  -8   4  -1   12.25    1.17
  -8   4  -1   11.20    1.07
  -8   4  -1   11.44    0.99
  -8   4  -1   11.14    1.00
  -8   4  -1   11.55    1.01
  -8   4  -1   11.15    0.97
   8  -4   1   10.49    1.03
   8  -4   1   13.72    1.13
   8  -4   1   11.15    1.03
   8  -4   1   10.05    0.95
   8  -4   1   12.14    1.07
   8  -4   1   11.55    0.98
   8  -4   1   11.32    1.03
   8  -4   1   11.47    1.14
   8  -4   1   11.94    1.04
  -9   4  -1   -0.01    0.80
  -9   4  -1    0.97    0.77
  -9   4  -1   -0.06    0.52
  -9   4  -1   -0.03    0.58
  -9   4  -1    0.10    0.64
  -9   4  -1   -0.34    0.66
  -9   4  -1   -0.09    0.57
  -9   4  -1   -0.58    0.66
  -9   4  -1   -0.43    0.63
   9  -4   1    1.21    0.65
   9  -4   1    0.31    0.74
   9  -4   1   -0.85    0.58
   9  -4   1    0.38    0.56
   9  -4   1   -0.25    0.70
   9  -4   1   -0.83    0.61
   9  -4   1    1.14    0.64
   9  -4   1   -0.09    0.64
 -10   4  -1    0.42    0.67
 -10   4  -1    1.66    0.72
 -10   4  -1    0.72    0.70
 -10   4  -1    0.47    0.70
 -10   4  -1    0.25    0.67
 -10   4  -1    0.57    0.66
  10  -4   1    1.04    0.77
  10  -4   1   -0.25    0.62
  10  -4   1    0.84    0.76
  10  -4   1   -1.50    0.65
  10  -4   1   -0.14    0.69
  10  -4   1    2.27    0.75
  10  -4   1    0.41    0.63
 -11   4  -1    3.74    0.86
 -11   4  -1    3.58    0.84
 -11   4  -1    4.54    0.97
 -11   4  -1    5.13    1.02
 -11   4  -1    3.79    0.89
 -11   4  -1    5.32    0.95
  11  -4   1    5.28    0.95
  11  -4   1    4.82    0.99
  11  -4   1    4.40    0.83
  11  -4   1    3.91    0.85
  11  -4   1    3.89    1.01
  11  -4   1    4.73    1.06
 -12   4  -1    0.56    0.90
 -12   4  -1    0.86    0.84
 -12   4  -1   -1.81    0.83
 -12   4  -1   -0.19    0.93
 -12   4  -1    0.45    0.95
 -12   4  -1   -0.39    0.85
  12  -4   1    0.20    0.81
  12  -4   1   -0.23    1.00
  12  -4   1    0.24    0.97
  12  -4   1    0.69    0.90
  12  -4   1    0.28    1.00
 -13   4  -1    0.72    1.00
 -13   4  -1    0.16    1.02
 -13   4  -1    1.56    1.80
 -13   4  -1    0.35    1.04
  13  -4   1    0.84    1.04
  13  -4   1   -0.69    0.90
  13  -4   1   -1.03    1.03
  13  -4   1    0.91    1.14
 -14   4  -1    1.25    1.22
 -14   4  -1    1.55    1.17
 -14   4  -1   -0.03    1.22
  14  -4   1   -0.16    1.31
  14  -4   1    2.45    1.17
  14  -4   1    1.21    1.16
  14  -4   1    1.34    1.12
 -15   4  -1   -0.51    1.37
 -15   4  -1   -0.66    1.27
 -15   4  -1   -0.77    1.39
  15  -4   1    2.40    1.54
  15  -4   1   -2.18    1.24
  15  -4   1   -0.04    1.28
  15  -4   1    0.04    1.26
  16   3  -1    0.72    1.04
  16   3  -1    0.27    1.36
 -16  -3   1   -1.04    1.32
 -16  -3   1   -0.97    1.45
 -16  -3   1   -0.93    1.02
  15   3  -1    0.68    1.20
  15   3  -1    1.40    0.93
 -15  -3   1    0.36    1.29
 -15  -3   1    2.78    1.34
 -15  -3   1   -0.67    0.84
  14   3  -1    0.35    1.00
  14   3  -1    1.26    0.73
  14   3  -1    0.57    0.79
  14   3  -1   -1.80    1.19
 -14  -3   1    0.41    1.10
 -14  -3   1    1.02    1.25
 -14  -3   1    0.21    0.70
 -14  -3   1   -0.15    0.74
 -14  -3   1   -0.43    0.99
 -14  -3   1    0.06    0.82
  13   3  -1    0.08    0.62
  13   3  -1    1.23    0.74
  13   3  -1    1.38    0.72
  13   3  -1    2.36    0.96
  13   3  -1    1.82    0.71
 -13  -3   1    1.86    0.96
 -13  -3   1    0.96    0.71
 -13  -3   1    2.04    1.00
 -13  -3   1    2.41    0.62
 -13  -3   1    1.12    0.54
 -13  -3   1    2.14    0.75
 -13  -3   1    2.72    0.82
 -13  -3   1    1.36    0.66
 -13  -3   1    1.16    0.65
  12   3  -1    0.58    0.45
  12   3  -1    0.37    0.80
  12   3  -1    0.93    0.61
  12   3  -1    0.04    0.60
  12   3  -1    0.34    0.59
  12   3  -1    0.15    0.54
 -12  -3   1    0.51    0.54
 -12  -3   1    0.16    0.83
 -12  -3   1   -0.60    0.63
 -12  -3   1    0.71    0.55
 -12  -3   1    0.67    0.86
 -12  -3   1    0.63    0.60
 -12  -3   1    0.97    0.59
 -12  -3   1   -0.46    0.58
 -12  -3   1    0.31    0.51
  11   3  -1   -0.45    0.50
  11   3  -1    0.33    0.42
  11   3  -1   -0.32    0.67
  11   3  -1   -0.04    0.45
  11   3  -1    0.57    0.54
 -11  -3   1    0.63    0.71
 -11  -3   1   -0.03    0.52
 -11  -3   1    0.17    0.49
 -11  -3   1    0.36    0.51
 -11  -3   1    0.19    0.47
 -11  -3   1   -0.09    0.44
 -11  -3   1   -0.08    0.77
 -11  -3   1   -0.52    0.45
 -11  -3   1    0.65    0.56
  10   3  -1    0.48    0.75
  10   3  -1   -0.46    0.38
  10   3  -1    0.60    0.49
  10   3  -1   -0.02    0.65
  10   3  -1    0.38    0.51
  10   3  -1    0.34    0.48
  10   3  -1   -0.16    0.39
 -10  -3   1   -0.29    0.44
 -10  -3   1    0.15    0.41
 -10  -3   1    0.75    0.40
 -10  -3   1   -0.03    0.45
 -10  -3   1    1.48    0.80
 -10  -3   1   -0.62    0.40
 -10  -3   1   -0.16    0.66
 -10  -3   1   -0.08    0.59
 -10  -3   1    0.47    0.47
 -10  -3   1    0.01    0.38
 -10  -3   1   -0.65    0.43
   9   3  -1   13.46    0.72
   9   3  -1   12.31    1.10
   9   3  -1   13.32    1.04
   9   3  -1   13.31    0.72
   9   3  -1   12.06    0.81
   9   3  -1   11.56    0.72
  -9  -3   1   13.44    0.68
  -9  -3   1   14.26    1.23
  -9  -3   1   13.02    0.77
  -9  -3   1   11.90    0.73
  -9  -3   1   13.03    0.74
  -9  -3   1   12.16    1.11
  -9  -3   1   12.09    0.81
  -9  -3   1   12.71    0.80
  -9  -3   1   13.47    0.66
  -9  -3   1   13.85    1.12
  -9  -3   1   14.21    1.06
  -9  -3   1   11.84    0.76
   8   3  -1    0.74    0.52
   8   3  -1    0.89    0.56
   8   3  -1    1.52    0.39
   8   3  -1    1.44    0.35
   8   3  -1    0.45    0.36
   8   3  -1    1.73    0.42
   8   3  -1    1.70    0.41
   8   3  -1    1.62    0.36
  -8  -3   1    2.31    0.64
  -8  -3   1    1.27    0.38
  -8  -3   1    1.70    0.32
  -8  -3   1    1.23    0.60
  -8  -3   1    1.10    0.63
  -8  -3   1    1.48    0.38
  -8  -3   1    1.40    0.49
  -8  -3   1    1.08    0.36
  -8  -3   1    1.31    0.35
  -8  -3   1    1.23    0.39
  -8  -3   1    1.01    0.31
   7   3  -1   26.17    1.09
   7   3  -1   25.65    0.87
   7   3  -1   26.82    0.78
   7   3  -1   26.91    1.08
   7   3  -1   26.94    0.82
   7   3  -1   27.29    0.85
   7   3  -1   27.76    0.79
   7   3  -1   25.76    0.88
  -7  -3   1   26.17    0.88
  -7  -3   1   25.34    0.86
  -7  -3   1   25.14    0.94
  -7  -3   1   27.93    0.75
  -7  -3   1   27.09    0.86
  -7  -3   1   25.93    0.81
  -7  -3   1   26.45    1.25
  -7  -3   1   25.43    1.19
  -7  -3   1   25.31    1.03
  -7  -3   1   28.42    1.13
  -7  -3   1   25.79    0.82
  -7  -3   1   24.62    1.00
   6   3  -1    3.88    0.38
   6   3  -1    3.93    0.53
   6   3  -1    3.11    0.41
   6   3  -1    3.51    0.37
   6   3  -1    4.21    0.42
   6   3  -1    3.80    0.49
   6   3  -1    3.50    0.37
   6   3  -1    3.61    0.42
  -6  -3   1    3.77    0.36
  -6  -3   1    3.29    0.36
  -6  -3   1    3.92    0.43
  -6  -3   1    3.76    0.45
  -6  -3   1    4.68    0.43
  -6  -3   1    2.75    0.53
  -6  -3   1    3.73    0.55
  -6  -3   1    3.80    0.43
  -6  -3   1    4.76    0.59
  -6  -3   1    4.16    0.34
  -6  -3   1    3.71    0.34
  -6  -3   1    4.42    0.49
   5   3  -1   99.60    1.91
   5   3  -1   99.18    2.07
   5   3  -1   95.85    1.91
   5   3  -1   99.60    1.86
   5   3  -1   95.37    2.15
   5   3  -1   96.31    1.84
  -5  -3   1   99.49    1.92
  -5  -3   1   96.78    2.21
  -5  -3   1   96.25    2.06
  -5  -3   1  102.51    2.23
  -5  -3   1   95.21    1.91
  -5  -3   1  100.26    1.91
  -5  -3   1   97.27    1.90
  -5  -3   1   98.83    1.80
  -5  -3   1   98.28    1.90
  -5  -3   1   99.72    2.18
  -5  -3   1   95.31    1.91
  -5  -3   1   99.89    2.02
  -5  -3   1  100.13    1.80
   4   3  -1   36.49    0.85
   4   3  -1   37.54    0.80
   4   3  -1   37.88    1.00
   4   3  -1   35.66    0.88
   4   3  -1   36.09    1.09
   4   3  -1   37.96    0.98
  -4  -3   1   36.87    1.12
  -4  -3   1   36.23    0.87
  -4  -3   1   37.10    0.76
  -4  -3   1   36.47    0.84
  -4  -3   1   36.86    0.87
  -4  -3   1   36.71    0.97
  -4  -3   1   36.59    0.87
  -4  -3   1   36.69    0.77
  -4  -3   1   36.40    0.85
  -4  -3   1   37.35    0.87
  -4  -3   1   37.63    0.99
   3   3  -1    1.86    0.21
   3   3  -1    1.90    0.25
   3   3  -1    1.49    0.32
   3   3  -1    1.87    0.23
   3   3  -1    1.91    0.21
   3   3  -1    1.84    0.27
   3   3  -1    1.81    0.22
   3   3  -1    1.55    0.37
   3   3  -1    1.61    0.35
   3   3  -1    1.57    0.24
  -3  -3   1    1.77    0.22
  -3  -3   1    1.77    0.24
  -3  -3   1    1.48    0.41
  -3  -3   1    1.69    0.36
  -3  -3   1    1.70    0.22
  -3  -3   1    1.48    0.18
  -3  -3   1    1.95    0.18
  -3  -3   1    1.82    0.23
  -3  -3   1    1.57    0.26
  -3  -3   1    2.00    0.34
   2   3  -1    6.73    0.50
   2   3  -1    6.74    0.34
   2   3  -1    6.59    0.33
   2   3  -1    6.44    0.39
   2   3  -1    6.20    0.34
   2   3  -1    7.21    0.39
   2   3  -1    6.76    0.34
   2   3  -1    6.58    0.49
  -2  -3   1    6.76    0.35
  -2  -3   1    6.57    0.50
  -2  -3   1    6.50    0.48
  -2  -3   1    6.22    0.33
  -2  -3   1    6.45    0.33
  -2  -3   1    6.60    0.37
  -2  -3   1    6.21    0.35
  -2  -3   1    7.46    0.49
  -2  -3   1    6.21    0.31
  -2  -3   1    6.65    0.32
  -2  -3   1    6.92    0.38
   1   3  -1    7.56    0.44
   1   3  -1    6.61    0.38
   1   3  -1    6.27    0.34
   1   3  -1    7.30    0.49
   1   3  -1    6.67    0.41
   1   3  -1    6.97    0.46
   1   3  -1    6.57    0.36
   1   3  -1    6.18    0.22
   1   3  -1    6.86    0.37
   1   3  -1    6.83    0.40
  -1  -3   1    6.07    0.40
  -1  -3   1    5.72    0.40
  -1  -3   1    6.63    0.47
  -1  -3   1    6.25    0.37
  -1  -3   1    7.72    0.42
  -1  -3   1    6.66    0.36
  -1  -3   1    6.77    0.36
  -1  -3   1    6.54    0.37
  -1  -3   1    6.61    0.23
   0   3  -1  488.76    8.34
   0   3  -1  481.64    8.33
   0   3  -1  488.49    8.34
   0   3  -1  481.91    8.30
   0   3  -1  490.19    8.36
   0   3  -1  486.90    8.33
   0   3  -1  481.06    8.34
   0   3  -1  477.30    8.14
   0  -3   1  475.40    8.14
   0  -3   1  474.41    8.34
   0  -3   1  488.09    8.34
   0  -3   1  488.51    8.33
   0  -3   1  498.40    8.34
   0  -3   1  490.41    8.33
   0  -3   1  483.74    8.33
   0  -3   1  479.40    8.30
   0  -3   1  487.69    8.36
   0  -3   1  494.98    8.35
  -1   3  -1   10.05    0.53
  -1   3  -1   10.10    0.55
  -1   3  -1   10.55    0.55
  -1   3  -1   10.96    0.52
  -1   3  -1   10.86    0.54
  -1   3  -1   10.88    0.39
  -1   3  -1   10.80    0.54
  -1   3  -1   10.95    0.48
   1  -3   1    9.41    0.50
   1  -3   1   10.16    0.56
   1  -3   1   10.66    0.54
   1  -3   1    9.95    0.53
   1  -3   1   10.50    0.53
   1  -3   1   10.78    0.38
   1  -3   1   10.91    0.57
   1  -3   1   10.09    0.48
   1  -3   1   11.19    0.56
   1  -3   1    9.77    0.52
  -2   3  -1   11.50    0.47
  -2   3  -1   10.80    0.59
  -2   3  -1   11.26    0.61
  -2   3  -1   10.70    0.59
  -2   3  -1   10.57    0.57
  -2   3  -1   10.98    0.59
  -2   3  -1   11.70    0.61
  -2   3  -1   11.24    0.48
  -2   3  -1   11.31    0.57
   2  -3   1   12.20    0.62
   2  -3   1   10.46    0.56
   2  -3   1   11.11    0.60
   2  -3   1   11.37    0.61
   2  -3   1   11.67    0.60
   2  -3   1   13.57    0.77
   2  -3   1   10.81    0.47
   2  -3   1   11.17    0.49
   2  -3   1   11.03    0.62
   2  -3   1   11.01    0.70
  -3   3  -1   55.61    1.40
  -3   3  -1   53.18    1.37
  -3   3  -1   54.96    1.34
  -3   3  -1   55.08    1.38
  -3   3  -1   56.38    1.34
  -3   3  -1   54.95    1.34
  -3   3  -1   57.13    1.35
  -3   3  -1   55.71    1.15
  -3   3  -1   55.41    1.28
   3  -3   1   56.06    1.28
   3  -3   1   55.51    1.35
   3  -3   1   56.39    1.40
   3  -3   1   54.24    1.38
   3  -3   1   55.59    1.38
   3  -3   1   55.63    1.15
   3  -3   1   56.39    1.34
   3  -3   1   57.19    1.42
   3  -3   1   55.56    1.37
  -4   3  -1    0.72    0.35
  -4   3  -1    0.59    0.36
  -4   3  -1    1.09    0.36
  -4   3  -1    0.99    0.35
  -4   3  -1    0.35    0.39
  -4   3  -1    1.04    0.45
  -4   3  -1    0.46    0.38
  -4   3  -1    0.76    0.19
  -4   3  -1    1.09    0.37
  -4   3  -1    0.18    0.38
   4  -3   1    0.53    0.37
   4  -3   1    0.64    0.19
   4  -3   1    0.64    0.32
   4  -3   1    0.51    0.34
   4  -3   1    1.18    0.41
   4  -3   1    0.58    0.35
   4  -3   1    0.44    0.50
   4  -3   1    0.61    0.20
   4  -3   1    0.56    0.41
   4  -3   1    0.59    0.40
   4  -3   1    0.56    0.31
  -5   3  -1    2.71    0.46
  -5   3  -1    2.40    0.48
  -5   3  -1    2.61    0.46
  -5   3  -1    1.59    0.43
  -5   3  -1    2.49    0.50
  -5   3  -1    1.88    0.44
  -5   3  -1    1.96    0.44
  -5   3  -1    1.52    0.40
  -5   3  -1    1.60    0.40
   5  -3   1    1.41    0.42
   5  -3   1    2.28    0.43
   5  -3   1    2.23    0.26
   5  -3   1    2.50    0.46
   5  -3   1    2.07    0.48
   5  -3   1    2.53    0.55
   5  -3   1    2.02    0.44
   5  -3   1    2.43    0.44
   5  -3   1    1.83    0.44
   5  -3   1    2.41    0.44
   5  -3   1    2.08    0.26
  -6   3  -1    2.66    0.47
  -6   3  -1    3.49    0.51
  -6   3  -1    3.11    0.50
  -6   3  -1    3.48    0.57
  -6   3  -1    5.45    0.85
  -6   3  -1    3.37    0.49
  -6   3  -1    3.44    0.56
  -6   3  -1    4.11    0.53
  -6   3  -1    3.92    0.54
   6  -3   1    3.84    0.58
   6  -3   1    4.87    0.54
   6  -3   1    2.91    0.53
   6  -3   1    3.23    0.22
   6  -3   1    3.49    0.56
   6  -3   1    3.74    0.49
   6  -3   1    4.35    0.61
   6  -3   1    4.33    0.56
   6  -3   1    3.08    0.22
   6  -3   1    3.12    0.47
   6  -3   1    4.88    0.59
  -7   3  -1    0.78    0.45
  -7   3  -1    0.04    0.48
  -7   3  -1    0.37    0.43
  -7   3  -1   -0.53    0.43
  -7   3  -1   -0.30    0.44
  -7   3  -1    0.08    0.50
  -7   3  -1    0.07    0.42
  -7   3  -1   -0.03    0.53
  -7   3  -1   -0.27    0.46
   7  -3   1    0.18    0.40
   7  -3   1   -0.03    0.47
   7  -3   1   -0.40    0.36
   7  -3   1    0.40    0.42
   7  -3   1    0.54    0.51
   7  -3   1   -0.08    0.35
   7  -3   1    0.04    0.45
   7  -3   1    0.18    0.50
   7  -3   1   -0.17    0.38
  -8   3  -1    5.71    0.75
  -8   3  -1    4.90    0.68
  -8   3  -1    5.19    0.64
  -8   3  -1    5.87    0.77
  -8   3  -1    4.75    0.70
  -8   3  -1    5.53    0.75
  -8   3  -1    4.61    0.66
  -8   3  -1    4.28    0.65
  -8   3  -1    4.02    0.56
   8  -3   1    4.56    0.68
   8  -3   1    3.39    0.64
   8  -3   1    4.97    0.62
   8  -3   1    4.24    0.73
   8  -3   1    4.56    0.75
   8  -3   1    4.45    0.66
   8  -3   1    5.50    0.64
   8  -3   1    5.57    0.73
   8  -3   1    4.40    0.67
  -9   3  -1    1.08    0.60
  -9   3  -1    0.65    0.71
  -9   3  -1    0.25    0.56
  -9   3  -1   -0.16    0.55
  -9   3  -1    0.32    0.62
  -9   3  -1   -0.03    0.56
  -9   3  -1    0.65    0.53
  -9   3  -1    0.53    0.56
  -9   3  -1    0.44    0.73
   9  -3   1   -0.33    0.54
   9  -3   1   -0.51    0.58
   9  -3   1    0.54    0.61
   9  -3   1   -0.02    0.61
   9  -3   1   -0.27    0.48
   9  -3   1   -1.10    0.45
   9  -3   1   -0.17    0.56
   9  -3   1    0.09    0.59
   9  -3   1    0.55    0.71
 -10   3  -1    8.98    0.96
 -10   3  -1    9.09    0.99
 -10   3  -1    8.96    1.22
 -10   3  -1    8.00    0.89
 -10   3  -1    8.06    0.87
 -10   3  -1    8.24    1.04
 -10   3  -1    8.16    0.88
  10  -3   1   10.09    1.31
  10  -3   1    8.44    1.12
  10  -3   1    8.82    1.02
  10  -3   1    9.17    0.94
  10  -3   1    7.91    0.94
  10  -3   1    9.63    1.06
 -11   3  -1   15.39    1.42
 -11   3  -1   17.57    1.32
 -11   3  -1   17.35    1.42
 -11   3  -1   13.52    1.28
 -11   3  -1   17.60    1.53
 -11   3  -1   16.49    1.35
  11  -3   1   16.21    1.51
  11  -3   1   16.48    1.51
  11  -3   1   14.31    1.34
  11  -3   1   17.63    1.54
  11  -3   1   17.25    1.36
  11  -3   1   19.19    1.43
 -12   3  -1    2.36    0.93
 -12   3  -1    2.53    0.91
 -12   3  -1    3.02    0.84
 -12   3  -1    2.70    0.92
 -12   3  -1    4.13    0.95
 -12   3  -1    1.64    0.85
  12  -3   1    2.66    0.83
  12  -3   1    4.30    1.01
  12  -3   1    3.75    0.89
  12  -3   1    2.36    0.86
  12  -3   1    2.33    1.05
 -13   3  -1    3.88    1.06
 -13   3  -1    4.37    1.03
 -13   3  -1    3.45    1.01
 -13   3  -1    3.51    1.05
  13  -3   1    3.08    0.93
  13  -3   1    3.37    1.04
  13  -3   1    3.69    1.11
  13  -3   1    0.80    1.17
 -14   3  -1    0.24    1.10
 -14   3  -1   -0.23    1.03
 -14   3  -1   -1.38    1.84
 -14   3  -1   -1.63    1.09
  14  -3   1   -0.73    1.02
  14  -3   1   -2.17    1.14
  14  -3   1    1.07    1.06
  14  -3   1    0.95    1.16
 -15   3  -1   -0.05    1.25
 -15   3  -1    0.18    1.33
 -15   3  -1   -0.23    1.21
  15  -3   1    3.48    1.38
  15  -3   1   -0.66    1.22
  15  -3   1    0.57    1.41
  15  -3   1   -0.69    1.20
 -16   3  -1   -2.78    1.50
 -16   3  -1   -1.64    1.43
 -16   3  -1    0.63    1.36
  16  -3   1    0.69    1.51
  16  -3   1   -0.33    1.34
  16  -3   1    3.04    1.76
  16   2  -1    0.60    1.15
  16   2  -1    1.42    1.40
 -16  -2   1    0.91    1.08
 -16  -2   1    0.01    1.68
 -16  -2   1    0.09    1.39
  15   2  -1    1.67    0.95
  15   2  -1    2.00    1.31
 -15  -2   1    1.65    1.26
 -15  -2   1    0.86    0.91
 -15  -2   1    0.60    0.89
 -15  -2   1    1.36    1.41
  14   2  -1    1.99    0.89
  14   2  -1    0.38    1.01
  14   2  -1    1.09    0.85
 -14  -2   1    2.86    1.15
 -14  -2   1    0.38    1.11
 -14  -2   1    3.03    0.99
 -14  -2   1    2.21    0.80
 -14  -2   1    2.59    1.16
 -14  -2   1    2.06    0.83
  13   2  -1    1.02    0.64
  13   2  -1    1.05    0.77
  13   2  -1   -0.30    0.91
  13   2  -1    0.72    0.72
  13   2  -1    0.01    0.75
  13   2  -1    0.30    0.69
 -13  -2   1    0.40    0.67
 -13  -2   1   -0.62    0.91
 -13  -2   1    2.90    1.13
 -13  -2   1    0.28    0.71
 -13  -2   1   -0.40    0.71
 -13  -2   1    1.25    0.74
  12   2  -1    0.82    0.69
  12   2  -1    0.27    0.77
  12   2  -1    1.02    0.73
  12   2  -1    0.00    0.62
  12   2  -1    1.37    0.62
  12   2  -1    0.20    0.58
 -12  -2   1    1.23    0.65
 -12  -2   1    0.43    1.30
 -12  -2   1    0.68    0.39
 -12  -2   1    0.83    0.56
 -12  -2   1    1.04    0.63
 -12  -2   1    1.01    0.37
 -12  -2   1    0.76    0.61
 -12  -2   1    0.78    0.86
  11   2  -1    1.25    0.57
  11   2  -1   -0.13    0.69
  11   2  -1    1.19    0.51
  11   2  -1    0.63    0.55
  11   2  -1    1.45    0.59
 -11  -2   1    1.32    0.53
 -11  -2   1    1.17    0.39
 -11  -2   1    1.81    0.58
 -11  -2   1   -0.05    0.77
 -11  -2   1    0.76    0.70
 -11  -2   1    1.50    0.60
 -11  -2   1    1.12    0.58
 -11  -2   1    0.96    0.38
  10   2  -1    2.75    0.40
  10   2  -1    2.99    0.51
  10   2  -1    2.19    0.55
  10   2  -1    3.55    0.57
  10   2  -1    2.35    0.76
  10   2  -1    2.74    0.51
  10   2  -1    2.60    0.54
  10   2  -1    1.65    0.67
 -10  -2   1    2.91    0.82
 -10  -2   1    1.38    0.71
 -10  -2   1    1.46    0.51
 -10  -2   1    2.22    0.51
 -10  -2   1    1.32    0.64
 -10  -2   1    2.45    0.52
 -10  -2   1    2.85    0.58
 -10  -2   1    3.21    0.58
 -10  -2   1    2.60    0.41
   9   2  -1    4.29    0.50
   9   2  -1    4.01    0.42
   9   2  -1    4.43    0.56
   9   2  -1    3.25    0.53
   9   2  -1    3.89    0.50
   9   2  -1    3.51    0.48
   9   2  -1    5.05    0.55
   9   2  -1    4.42    0.71
   9   2  -1    4.26    0.79
   9   2  -1    3.48    0.77
  -9  -2   1    4.08    0.42
  -9  -2   1    4.55    0.86
  -9  -2   1    3.67    0.50
  -9  -2   1    4.09    0.54
  -9  -2   1    5.05    0.50
  -9  -2   1    4.61    0.83
  -9  -2   1    4.08    0.68
  -9  -2   1    3.25    0.49
  -9  -2   1    4.38    0.48
  -9  -2   1    3.52    0.52
  -9  -2   1    3.61    0.79
[truncated: 4,447,598 more chars]
